# Supplementary material
Source: publisher figshare collection journal article supplement (https://gsajournals.figshare.com/articles/dataset/_/14450454)
Supplement: Supplementary file 1 [file 1]

**Supplementary file 5.** The whole genome linkage maps developed in ND495 × Largo RIL recombinant inbred line population.

|    | Chr. | Index on 90K SNP<br>iSelect array | Marker Name | SNP Name                     | NDLargo<br>Dist. (cM) |
|----|------|-----------------------------------|-------------|------------------------------|-----------------------|
| 1  | 1A   | 12147                             | IWB12147    | BS00100774_51                | 0.0                   |
| 2  | 1A   | 6234                              | IWB6234     | BS00010488_51                | 0.3                   |
| 3  | 1A   | 80188                             | IWA6644     | wsnp_Ku_c1818_3557408        | 1.4                   |
| 4  | 1A   | 74213                             | IWB74213    | tplb0025b13_150              | 1.4                   |
| 5  | 1A   | 48747                             | IWB48747    | Kukri_rep_c102231_265        | 4.3                   |
| 6  | 1A   | 42635                             | IWB42635    | Kukri_c22349_754             | 4.3                   |
| 7  | 1A   | 32244                             | IWB32244    | GENE-1118_58                 | 4.3                   |
| 8  | 1A   | 7436                              | IWB7436     | BS00023130_51                | 4.3                   |
| 9  | 1A   | 17894                             | IWB17894    | D_GA8KES402HR8TV_187         | 5.1                   |
| 10 | 1A   | 81583                             | IWA8622     | wsnp_RFL_Contig4735_5673999  | 5.1                   |
| 11 | 1A   | 31867                             | IWB31867    | GENE-0411_807                | 5.7                   |
| 12 | 1A   | 79135                             | IWA5150     | wsnp_Ex_rep_c106111_90308719 | 5.7                   |
| 13 | 1A   | 31866                             | IWB31866    | GENE-0411_723                | 5.7                   |
| 14 | 1A   | 8796                              | IWB8796     | BS00060058_51                | 6.8                   |
| 15 | 1A   | 29039                             | IWB29039    | Excalibur_c82557_201         | 8.0                   |
| 16 | 1A   | 37531                             | IWB37531    | JD_c49343_475                | 8.0                   |
| 17 | 1A   | 29562                             | IWB29562    | Excalibur_c9676_163          | 8.0                   |
| 18 | 1A   | 6172                              | IWB6172     | BS00010128_51                | 8.0                   |
| 19 | 1A   | 54411                             | IWB54411    | RAC875_c1710_376             | 8.0                   |
| 20 | 1A   | 27228                             | IWB27228    | Excalibur_c5139_198          | 8.0                   |
| 21 | 1A   | 73128                             | IWB73128    | Tdurum_contig68827_118       | 8.6                   |
| 22 | 1A   | 43759                             | IWB43759    | Kukri_c29655_239             | 8.6                   |
| 23 | 1A   | 23623                             | IWB23623    | Excalibur_c21298_515         | 14.5                  |
| 24 | 1A   | 6195                              | IWB6195     | BS00010267_51                | 14.5                  |
| 25 | 1A   | 61182                             | IWB61182    | RAC875_c97040_104            | 14.7                  |
| 26 | 1A   | 69234                             | IWB69234    | Tdurum_contig26035_231       | 14.7                  |
| 27 | 1A   | 59323                             | IWB59323    | RAC875_c57939_78             | 14.7                  |
| 28 | 1A   | 20818                             | IWB20818    | Ex_c4876_1221                | 16.5                  |
| 29 | 1A   | 42452                             | IWB42452    | Kukri_c2121_2345             | 16.5                  |
| 30 | 1A   | 71175                             | IWB71175    | Tdurum_contig42479_3800      | 16.5                  |
| 31 | 1A   | 35649                             | IWB35649    | IACX11001                    | 16.5                  |
| 32 | 1A   | 39517                             | IWB39517    | Ku_c4823_673                 | 16.8                  |
| 33 | 1A   | 24273                             | IWB24273    | Excalibur_c25175_512         | 16.8                  |
| 34 | 1A   | 27788                             | IWB27788    | Excalibur_c58154_84          | 16.8                  |
| 35 | 1A   | 34835                             | IWB34835    | IAAV4132                     | 16.8                  |
| 36 | 1A   | 11301                             | IWB11301    | BS00083459_51                | 16.8                  |
| 37 | 1A   | 45180                             | IWB45180    | Kukri_c41943_535             | 16.8                  |
| 38 | 1A   | 73615                             | IWB73615    | Tdurum_contig83113_134       | 18.4                  |
| 39 | 1A   | 22004                             | IWB22004    | Excalibur_c11941_612         | 28.4                  |
| 40 | 1A   | 76219                             | IWA1388     | wsnp_Ex_c10783_17555091      | 28.7                  |
| 41 | 1A   | 14137                             | IWB14137    | CAP7_c4833_141               | 28.7                  |
| 42 | 1A   | 76218                             | IWA1387     | wsnp_Ex_c10783_17554146      | 28.7                  |
| 43 | 1A   | 54031                             | IWB54031    | RAC875_c14926_589            | 29.2                  |
| 44 | 1A   | 72066                             | IWB72066    | Tdurum_contig50355_685       | 30.7                  |
| 45 | 1A   | 69751                             | IWB69751    | Tdurum_contig29280_216       | 31.3                  |
| 46 | 1A   | 35770                             | IWB35770    | IACX1592                     | 31.8                  |
| 47 | 1A   | 60704                             | IWB60704    | RAC875_c826_2186             | 32.1                  |
| 48 | 1A   | 35066                             | IWB35066    | IAAV5652                     | 32.4                  |
| 49 | 1A   | 6538                              | IWB6538     | BS00012210_51                | 32.4                  |

|     |    |       |          |                              |      |
|-----|----|-------|----------|------------------------------|------|
| 50  | 1A | 64888 | IWB64888 | RFL_Contig5090_1510          | 32.7 |
| 51  | 1A | 71771 | IWB71771 | Tdurum_contig47183_205       | 32.7 |
| 52  | 1A | 30674 | IWB30674 | Excalibur_rep_c114535_55     | 33.2 |
| 53  | 1A | 42898 | IWB42898 | Kukri_c23985_166             | 33.2 |
| 54  | 1A | 43982 | IWB43982 | Kukri_c3150_341              | 33.2 |
| 55  | 1A | 73155 | IWB73155 | Tdurum_contig69753_513       | 33.2 |
| 56  | 1A | 38267 | IWB38267 | Ku_c11769_252                | 33.2 |
| 57  | 1A | 72041 | IWB72041 | Tdurum_contig5008_556        | 33.2 |
| 58  | 1A | 74997 | IWB74997 | tplb0052b04_1651             | 33.2 |
| 59  | 1A | 7075  | IWB7075  | BS00022426_51                | 33.2 |
| 60  | 1A | 10025 | IWB10025 | BS00067339_51                | 33.2 |
| 61  | 1A | 49291 | IWB49291 | Kukri_rep_c107771_588        | 33.2 |
| 62  | 1A | 64273 | IWB64273 | RFL_Contig3232_1224          | 33.2 |
| 63  | 1A | 72042 | IWB72042 | Tdurum_contig5008_635        | 33.2 |
| 64  | 1A | 46021 | IWB46021 | Kukri_c49776_192             | 33.2 |
| 65  | 1A | 42899 | IWB42899 | Kukri_c23985_229             | 33.2 |
| 66  | 1A | 6583  | IWB6583  | BS00013227_51                | 33.2 |
| 67  | 1A | 7300  | IWB7300  | BS00022870_51                | 33.2 |
| 68  | 1A | 12486 | IWB12486 | BS00110151_51                | 33.2 |
| 69  | 1A | 9220  | IWB9220  | BS00064197_51                | 33.5 |
| 70  | 1A | 26888 | IWB26888 | Excalibur_c47654_70          | 33.5 |
| 71  | 1A | 59114 | IWB59114 | RAC875_c5544_4156            | 34.1 |
| 72  | 1A | 48980 | IWB48980 | Kukri_rep_c104386_273        | 34.1 |
| 73  | 1A | 35115 | IWB35115 | IAAV5931                     | 35.3 |
| 74  | 1A | 75447 | IWA164   | wsnp_BE445121A_Ta_1_8        | 35.3 |
| 75  | 1A | 58229 | IWB58229 | RAC875_c46269_387            | 35.8 |
| 76  | 1A | 57257 | IWB57257 | RAC875_c37183_331            | 36.7 |
| 77  | 1A | 77388 | IWA2921  | wsnp_Ex_c24686_33941368      | 36.7 |
| 78  | 1A | 77208 | IWA2656  | wsnp_Ex_c2181_4089788        | 36.7 |
| 79  | 1A | 27624 | IWB27624 | Excalibur_c5606_1192         | 36.7 |
| 80  | 1A | 77207 | IWA2655  | wsnp_Ex_c2181_4089639        | 36.7 |
| 81  | 1A | 77389 | IWA2922  | wsnp_Ex_c24686_33942264      | 36.7 |
| 82  | 1A | 21167 | IWB21167 | Ex_c68770_506                | 36.7 |
| 83  | 1A | 34853 | IWB34853 | IAAV4243                     | 36.7 |
| 84  | 1A | 80781 | IWA7421  | wsnp_Ku_rep_c107796_93118214 | 37.0 |
| 85  | 1A | 35435 | IWB35435 | IAAV814                      | 37.2 |
| 86  | 1A | 43050 | IWB43050 | Kukri_c24897_140             | 37.2 |
| 87  | 1A | 76270 | IWA1450  | wsnp_Ex_c111741_93530669     | 37.2 |
| 88  | 1A | 77722 | IWA3346  | wsnp_Ex_c31525_40302140      | 37.2 |
| 89  | 1A | 20438 | IWB20438 | Ex_c29914_480                | 37.2 |
| 90  | 1A | 34698 | IWB34698 | IAAV3306                     | 37.2 |
| 91  | 1A | 79077 | IWA5080  | wsnp_Ex_rep_c103028_88077819 | 37.2 |
| 92  | 1A | 81405 | IWA8307  | wsnp_RFL_Contig2185_1520256  | 37.2 |
| 93  | 1A | 20986 | IWB20986 | Ex_c60135_528                | 37.2 |
| 94  | 1A | 35478 | IWB35478 | IAAV8458                     | 37.2 |
| 95  | 1A | 45088 | IWB45088 | Kukri_c4099_321              | 37.2 |
| 96  | 1A | 77537 | IWA3115  | wsnp_Ex_c2749_5091813        | 37.2 |
| 97  | 1A | 1215  | IWB1215  | BobWhite_c18773_75           | 37.2 |
| 98  | 1A | 52278 | IWB52278 | Ra_c5696_1556                | 37.2 |
| 99  | 1A | 77723 | IWA3347  | wsnp_Ex_c31525_40302747      | 37.2 |
| 100 | 1A | 76373 | IWA1580  | wsnp_Ex_c12101_19360213      | 37.2 |
| 101 | 1A | 34385 | IWB34385 | IAAV1463                     | 37.2 |
| 102 | 1A | 45874 | IWB45874 | Kukri_c48434_88              | 37.8 |
| 103 | 1A | 2715  | IWB2715  | BobWhite_c34661_208          | 37.8 |

|     |    |       |          |                              |      |
|-----|----|-------|----------|------------------------------|------|
| 104 | 1A | 75674 | IWA492   | wsnp_BF478737A_Ta_2_1        | 37.8 |
| 105 | 1A | 8965  | IWB8965  | BS00062969_51                | 37.8 |
| 106 | 1A | 46905 | IWB46905 | Kukri_c6106_470              | 37.8 |
| 107 | 1A | 9043  | IWB9043  | BS00063363_51                | 37.8 |
| 108 | 1A | 8098  | IWB8098  | BS00037255_51                | 37.8 |
| 109 | 1A | 78142 | IWA3882  | wsnp_Ex_c44049_50205457      | 37.8 |
| 110 | 1A | 78902 | IWA4852  | wsnp_Ex_c8885_14842394       | 37.8 |
| 111 | 1A | 64861 | IWB64861 | RFL_Contig5001_1099          | 37.8 |
| 112 | 1A | 30957 | IWB30957 | Excalibur_rep_c68424_255     | 37.8 |
| 113 | 1A | 3033  | IWB3033  | BobWhite_c39091_286          | 37.8 |
| 114 | 1A | 31877 | IWB31877 | GENE-0431_601                | 38.9 |
| 115 | 1A | 45682 | IWB45682 | Kukri_c46608_277             | 38.9 |
| 116 | 1A | 76562 | IWA1811  | wsnp_Ex_c13783_21613564      | 38.9 |
| 117 | 1A | 54969 | IWB54969 | RAC875_c2021_1417            | 38.9 |
| 118 | 1A | 1568  | IWB1568  | BobWhite_c22256_79           | 38.9 |
| 119 | 1A | 48097 | IWB48097 | Kukri_c8682_360              | 38.9 |
| 120 | 1A | 31634 | IWB31634 | GENE-0041_182                | 38.9 |
| 121 | 1A | 25588 | IWB25588 | Excalibur_c35312_109         | 38.9 |
| 122 | 1A | 7700  | IWB7700  | BS00028874_51                | 38.9 |
| 123 | 1A | 79199 | IWA5226  | wsnp_Ex_rep_c66382_64577768  | 38.9 |
| 124 | 1A | 77868 | IWA3534  | wsnp_Ex_c3567_6526582        | 38.9 |
| 125 | 1A | 7945  | IWB7945  | BS00033760_51                | 38.9 |
| 126 | 1A | 35516 | IWB35516 | IAAV8664                     | 38.9 |
| 127 | 1A | 42962 | IWB42962 | Kukri_c24402_564             | 38.9 |
| 128 | 1A | 36287 | IWB36287 | IACX8300                     | 38.9 |
| 129 | 1A | 79936 | IWA6260  | wsnp_JD_rep_c49359_33578909  | 38.9 |
| 130 | 1A | 75973 | IWA948   | wsnp_CAP12_c2645_1267978     | 38.9 |
| 131 | 1A | 11427 | IWB11427 | BS00085851_51                | 38.9 |
| 132 | 1A | 6128  | IWB6128  | BS00009866_51                | 38.9 |
| 133 | 1A | 81112 | IWA7879  | wsnp_Ra_c34203_42948357      | 38.9 |
| 134 | 1A | 6744  | IWB6744  | BS00021730_51                | 38.9 |
| 135 | 1A | 55216 | IWB55216 | RAC875_c21620_1359           | 38.9 |
| 136 | 1A | 55447 | IWB55447 | RAC875_c2313_410             | 38.9 |
| 137 | 1A | 48331 | IWB48331 | Kukri_c93273_605             | 38.9 |
| 138 | 1A | 44534 | IWB44534 | Kukri_c362_151               | 38.9 |
| 139 | 1A | 31380 | IWB31380 | Excalibur_rep_c88290_94      | 38.9 |
| 140 | 1A | 7637  | IWB7637  | BS00026777_51                | 38.9 |
| 141 | 1A | 80792 | IWA7439  | wsnp_Ku_rep_c68419_67400635  | 38.9 |
| 142 | 1A | 10001 | IWB10001 | BS00067277_51                | 38.9 |
| 143 | 1A | 81371 | IWA8255  | wsnp_RFL_Contig1736_858448   | 38.9 |
| 144 | 1A | 78992 | IWA4974  | wsnp_Ex_c9872_16271161       | 38.9 |
| 145 | 1A | 78280 | IWA4061  | wsnp_Ex_c49829_54319220      | 38.9 |
| 146 | 1A | 77992 | IWA3690  | wsnp_Ex_c39661_46902689      | 38.9 |
| 147 | 1A | 76658 | IWA1934  | wsnp_Ex_c14733_22819625      | 38.9 |
| 148 | 1A | 43323 | IWB43323 | Kukri_c26669_515             | 38.9 |
| 149 | 1A | 35544 | IWB35544 | IAAV8824                     | 38.9 |
| 150 | 1A | 11503 | IWB11503 | BS00087437_51                | 38.9 |
| 151 | 1A | 6200  | IWB6200  | BS00010287_51                | 38.9 |
| 152 | 1A | 1803  | IWB1803  | BobWhite_c24113_529          | 38.9 |
| 153 | 1A | 6380  | IWB6380  | BS00011286_51                | 38.9 |
| 154 | 1A | 28360 | IWB28360 | Excalibur_c65280_322         | 38.9 |
| 155 | 1A | 28236 | IWB28236 | Excalibur_c63753_211         | 38.9 |
| 156 | 1A | 79120 | IWA5133  | wsnp_Ex_rep_c105244_89727546 | 38.9 |
| 157 | 1A | 81054 | IWA7804  | wsnp_Ra_c26956_36503468      | 38.9 |

|     |    |       |          |                              |      |
|-----|----|-------|----------|------------------------------|------|
| 158 | 1A | 79098 | IWA5109  | wsnp_Ex_rep_c104050_88861052 | 38.9 |
| 159 | 1A | 77839 | IWA3499  | wsnp_Ex_c34821_43076533      | 38.9 |
| 160 | 1A | 76933 | IWA2289  | wsnp_Ex_c18196_27006489      | 38.9 |
| 161 | 1A | 76756 | IWA2057  | wsnp_Ex_c15722_24074399      | 38.9 |
| 162 | 1A | 65677 | IWB65677 | TA003382-0407                | 38.9 |
| 163 | 1A | 33065 | IWB33065 | GENE-2795_120                | 38.9 |
| 164 | 1A | 31971 | IWB31971 | GENE-0561_311                | 38.9 |
| 165 | 1A | 30482 | IWB30482 | Excalibur_rep_c110450_286    | 38.9 |
| 166 | 1A | 25221 | IWB25221 | Excalibur_c32608_64          | 38.9 |
| 167 | 1A | 23434 | IWB23434 | Excalibur_c20133_87          | 38.9 |
| 168 | 1A | 22559 | IWB22559 | Excalibur_c15098_591         | 38.9 |
| 169 | 1A | 9258  | IWB9258  | BS00064357_51                | 38.9 |
| 170 | 1A | 43194 | IWB43194 | Kukri_c25839_487             | 38.9 |
| 171 | 1A | 79365 | IWA5435  | wsnp_Ex_rep_c67665_66326492  | 38.9 |
| 172 | 1A | 78196 | IWA3952  | wsnp_Ex_c45880_51550172      | 38.9 |
| 173 | 1A | 11660 | IWB11660 | BS00090408_51                | 38.9 |
| 174 | 1A | 27561 | IWB27561 | Excalibur_c55370_192         | 38.9 |
| 175 | 1A | 76905 | IWA2247  | wsnp_Ex_c17684_26426672      | 38.9 |
| 176 | 1A | 75874 | IWA764   | wsnp_CAP11_c3968_1874257     | 38.9 |
| 177 | 1A | 7604  | IWB7604  | BS00026015_51                | 38.9 |
| 178 | 1A | 34368 | IWB34368 | IAAV1368                     | 38.9 |
| 179 | 1A | 78659 | IWA4555  | wsnp_Ex_c66106_64268316      | 38.9 |
| 180 | 1A | 48617 | IWB48617 | Kukri_rep_c101218_200        | 38.9 |
| 181 | 1A | 20214 | IWB20214 | Ex_c2389_1633                | 38.9 |
| 182 | 1A | 78135 | IWA3875  | wsnp_Ex_c43586_49862663      | 38.9 |
| 183 | 1A | 43755 | IWB43755 | Kukri_c29652_858             | 38.9 |
| 184 | 1A | 21432 | IWB21432 | Ex_c9201_714                 | 38.9 |
| 185 | 1A | 34812 | IWB34812 | IAAV3998                     | 38.9 |
| 186 | 1A | 45313 | IWB45313 | Kukri_c4318_101              | 38.9 |
| 187 | 1A | 9773  | IWB9773  | BS00066308_51                | 38.9 |
| 188 | 1A | 76766 | IWA2070  | wsnp_Ex_c15852_24239968      | 38.9 |
| 189 | 1A | 3143  | IWB3143  | BobWhite_c40914_538          | 38.9 |
| 190 | 1A | 20564 | IWB20564 | Ex_c3567_1048                | 38.9 |
| 191 | 1A | 25829 | IWB25829 | Excalibur_c37474_179         | 38.9 |
| 192 | 1A | 25830 | IWB25830 | Excalibur_c37474_242         | 38.9 |
| 193 | 1A | 60543 | IWB60543 | RAC875_c7891_426             | 38.9 |
| 194 | 1A | 77816 | IWA3472  | wsnp_Ex_c34260_42602649      | 38.9 |
| 195 | 1A | 80183 | IWA6636  | wsnp_Ku_c17726_26872129      | 38.9 |
| 196 | 1A | 8963  | IWB8963  | BS00062965_51                | 38.9 |
| 197 | 1A | 8993  | IWB8993  | BS00063063_51                | 38.9 |
| 198 | 1A | 10020 | IWB10020 | BS00067330_51                | 38.9 |
| 199 | 1A | 12821 | IWB12821 | CAP11_c2984_419              | 38.9 |
| 200 | 1A | 21853 | IWB21853 | Excalibur_c11374_1126        | 38.9 |
| 201 | 1A | 26580 | IWB26580 | Excalibur_c44731_1000        | 38.9 |
| 202 | 1A | 28821 | IWB28821 | Excalibur_c7692_139          | 38.9 |
| 203 | 1A | 31970 | IWB31970 | GENE-0561_101                | 38.9 |
| 204 | 1A | 34538 | IWB34538 | IAAV2342                     | 38.9 |
| 205 | 1A | 35339 | IWB35339 | IAAV742                      | 38.9 |
| 206 | 1A | 36259 | IWB36259 | IACX7921                     | 38.9 |
| 207 | 1A | 39079 | IWB39079 | Ku_c2898_1284                | 38.9 |
| 208 | 1A | 43938 | IWB43938 | Kukri_c31093_387             | 38.9 |
| 209 | 1A | 77341 | IWA2850  | wsnp_Ex_c2389_4477880        | 38.9 |
| 210 | 1A | 79172 | IWA5194  | wsnp_Ex_rep_c66282_64438053  | 38.9 |
| 211 | 1A | 54664 | IWB54664 | RAC875_c18355_804            | 38.9 |

|     |    |       |          |                              |      |
|-----|----|-------|----------|------------------------------|------|
| 212 | 1A | 57230 | IWB57230 | RAC875_c37025_2027           | 38.9 |
| 213 | 1A | 60520 | IWB60520 | RAC875_c7847_1352            | 38.9 |
| 214 | 1A | 61297 | IWB61297 | RAC875_c9965_354             | 38.9 |
| 215 | 1A | 69335 | IWB69335 | Tdurum_contig27840_865       | 38.9 |
| 216 | 1A | 75789 | IWA639   | wsnp_CAP11_c1029_611774      | 38.9 |
| 217 | 1A | 78032 | IWA3740  | wsnp_Ex_c40942_47886087      | 38.9 |
| 218 | 1A | 78247 | IWA4020  | wsnp_Ex_c48375_53299028      | 38.9 |
| 219 | 1A | 78286 | IWA4071  | wsnp_Ex_c50235_54588957      | 38.9 |
| 220 | 1A | 78556 | IWA4417  | wsnp_Ex_c6075_10637792       | 38.9 |
| 221 | 1A | 76335 | IWA1530  | wsnp_Ex_c11697_18821490      | 38.9 |
| 222 | 1A | 77640 | IWA3249  | wsnp_Ex_c2972_5477975        | 38.9 |
| 223 | 1A | 78589 | IWA4466  | wsnp_Ex_c6278_10941843       | 38.9 |
| 224 | 1A | 78678 | IWA4578  | wsnp_Ex_c6826_11774795       | 38.9 |
| 225 | 1A | 78842 | IWA4775  | wsnp_Ex_c8162_13799067       | 38.9 |
| 226 | 1A | 78858 | IWA4798  | wsnp_Ex_c8374_14111734       | 38.9 |
| 227 | 1A | 79057 | IWA5054  | wsnp_Ex_rep_c102155_87382570 | 38.9 |
| 228 | 1A | 79514 | IWA5636  | wsnp_Ex_rep_c69775_68731015  | 38.9 |
| 229 | 1A | 80992 | IWA7716  | wsnp_Ra_c20163_29413615      | 38.9 |
| 230 | 1A | 81144 | IWA7922  | wsnp_Ra_c41581_48764320      | 38.9 |
| 231 | 1A | 81357 | IWA8230  | wsnp_RFL_Contig1186_254286   | 38.9 |
| 232 | 1A | 6148  | IWB6148  | BS00010004_51                | 38.9 |
| 233 | 1A | 6962  | IWB6962  | BS00022201_51                | 38.9 |
| 234 | 1A | 8080  | IWB8080  | BS00037007_51                | 38.9 |
| 235 | 1A | 10894 | IWB10894 | BS00076668_51                | 38.9 |
| 236 | 1A | 12461 | IWB12461 | BS00110039_51                | 38.9 |
| 237 | 1A | 19851 | IWB19851 | Ex_c14515_220                | 38.9 |
| 238 | 1A | 20204 | IWB20204 | Ex_c23451_720                | 38.9 |
| 239 | 1A | 28052 | IWB28052 | Excalibur_c6141_1337         | 38.9 |
| 240 | 1A | 28329 | IWB28329 | Excalibur_c64855_328         | 38.9 |
| 241 | 1A | 34461 | IWB34461 | IAAV1851                     | 38.9 |
| 242 | 1A | 34787 | IWB34787 | IAAV3846                     | 38.9 |
| 243 | 1A | 35337 | IWB35337 | IAAV7414                     | 38.9 |
| 244 | 1A | 35579 | IWB35579 | IAAV9022                     | 38.9 |
| 245 | 1A | 39019 | IWB39019 | Ku_c2742_638                 | 38.9 |
| 246 | 1A | 39078 | IWB39078 | Ku_c2898_1247                | 38.9 |
| 247 | 1A | 39080 | IWB39080 | Ku_c2898_221                 | 38.9 |
| 248 | 1A | 44535 | IWB44535 | Kukri_c362_91                | 38.9 |
| 249 | 1A | 50585 | IWB50585 | Kukri_rep_c99813_69          | 38.9 |
| 250 | 1A | 51652 | IWB51652 | Ra_c272_1632                 | 38.9 |
| 251 | 1A | 55280 | IWB55280 | RAC875_c2202_1097            | 38.9 |
| 252 | 1A | 63226 | IWB63226 | RAC875_rep_c85118_294        | 38.9 |
| 253 | 1A | 76294 | IWA1482  | wsnp_Ex_c11374_18361760      | 38.9 |
| 254 | 1A | 76657 | IWA1933  | wsnp_Ex_c14733_22819350      | 38.9 |
| 255 | 1A | 76906 | IWA2248  | wsnp_Ex_c17684_26426785      | 38.9 |
| 256 | 1A | 76967 | IWA2337  | wsnp_Ex_c18662_27538313      | 38.9 |
| 257 | 1A | 77058 | IWA2456  | wsnp_Ex_c19730_28728245      | 38.9 |
| 258 | 1A | 77342 | IWA2851  | wsnp_Ex_c2389_4478238        | 38.9 |
| 259 | 1A | 77417 | IWA2957  | wsnp_Ex_c25220_34487119      | 38.9 |
| 260 | 1A | 77716 | IWA3338  | wsnp_Ex_c3142_5808330        | 38.9 |
| 261 | 1A | 77717 | IWA3339  | wsnp_Ex_c3142_5808713        | 38.9 |
| 262 | 1A | 77794 | IWA3442  | wsnp_Ex_c3365_6183009        | 38.9 |
| 263 | 1A | 77929 | IWA3612  | wsnp_Ex_c3747_6824863        | 38.9 |
| 264 | 1A | 77991 | IWA3689  | wsnp_Ex_c39661_46902650      | 38.9 |
| 265 | 1A | 78155 | IWA3898  | wsnp_Ex_c44498_50537128      | 38.9 |

|     |    |       |          |                              |      |
|-----|----|-------|----------|------------------------------|------|
| 266 | 1A | 78620 | IWA4508  | wsnp_Ex_c645_1273590         | 38.9 |
| 267 | 1A | 78621 | IWA4509  | wsnp_Ex_c645_1273901         | 38.9 |
| 268 | 1A | 78838 | IWA4769  | wsnp_Ex_c8101_13712260       | 38.9 |
| 269 | 1A | 78887 | IWA4834  | wsnp_Ex_c8666_14522816       | 38.9 |
| 270 | 1A | 79121 | IWA5134  | wsnp_Ex_rep_c105244_89727666 | 38.9 |
| 271 | 1A | 79122 | IWA5135  | wsnp_Ex_rep_c105244_89727820 | 38.9 |
| 272 | 1A | 79377 | IWA5451  | wsnp_Ex_rep_c67763_66441222  | 38.9 |
| 273 | 1A | 81222 | IWA8035  | wsnp_Ra_c6474_11298858       | 38.9 |
| 274 | 1A | 12189 | IWB12189 | BS00102492_51                | 38.9 |
| 275 | 1A | 7788  | IWB7788  | BS00030644_51                | 38.9 |
| 276 | 1A | 21347 | IWB21347 | Ex_c801_820                  | 38.9 |
| 277 | 1A | 54199 | IWB54199 | RAC875_c15998_53             | 38.9 |
| 278 | 1A | 76557 | IWA1806  | wsnp_Ex_c1374_2630830        | 38.9 |
| 279 | 1A | 76400 | IWA1613  | wsnp_Ex_c12352_19708127      | 38.9 |
| 280 | 1A | 31690 | IWB31690 | GENE-0126_140                | 38.9 |
| 281 | 1A | 35469 | IWB35469 | IAAV839                      | 38.9 |
| 282 | 1A | 79176 | IWA5199  | wsnp_Ex_rep_c66318_64485410  | 38.9 |
| 283 | 1A | 60818 | IWB60818 | RAC875_c85778_184            | 38.9 |
| 284 | 1A | 68883 | IWB68883 | Tdurum_contig20581_256       | 38.9 |
| 285 | 1A | 61932 | IWB61932 | RAC875_rep_c110052_194       | 38.9 |
| 286 | 1A | 31018 | IWB31018 | Excalibur_rep_c69012_742     | 38.9 |
| 287 | 1A | 35050 | IWB35050 | IAAV5581                     | 38.9 |
| 288 | 1A | 28151 | IWA5194  | wsnp_Ex_rep_c66282_64438053  | 38.9 |
| 289 | 1A | 52514 | IWB52514 | Ra_c7062_430                 | 38.9 |
| 290 | 1A | 28131 | IWB28131 | Excalibur_c6255_1119         | 38.9 |
| 291 | 1A | 11756 | IWB11756 | BS00092422_51                | 38.9 |
| 292 | 1A | 8634  | IWB8634  | BS00053718_51                | 38.9 |
| 293 | 1A | 8491  | IWB8491  | BS00048118_51                | 38.9 |
| 294 | 1A | 6966  | IWB6966  | BS00022207_51                | 38.9 |
| 295 | 1A | 74462 | IWB74462 | tplb0032d09_1393             | 38.9 |
| 296 | 1A | 10935 | IWB10935 | BS00077504_51                | 38.9 |
| 297 | 1A | 77802 | IWA3451  | wsnp_Ex_c33831_42253707      | 38.9 |
| 298 | 1A | 78143 | IWA3883  | wsnp_Ex_c44049_50205614      | 38.9 |
| 299 | 1A | 79729 | IWA5952  | wsnp_JD_c24506_20670773      | 38.9 |
| 300 | 1A | 11130 | IWB11130 | BS00080438_51                | 38.9 |
| 301 | 1A | 10889 | IWB10889 | BS00076538_51                | 38.9 |
| 302 | 1A | 8519  | IWB8519  | BS00048887_51                | 38.9 |
| 303 | 1A | 6784  | IWB6784  | BS00021895_51                | 38.9 |
| 304 | 1A | 5898  | IWB5898  | BS00003813_51                | 38.9 |
| 305 | 1A | 5887  | IWB5887  | BS00003758_51                | 38.9 |
| 306 | 1A | 81251 | IWA8071  | wsnp_Ra_c7847_13421750       | 38.9 |
| 307 | 1A | 80776 | IWA7413  | wsnp_Ku_rep_c104517_90964418 | 38.9 |
| 308 | 1A | 79419 | IWA5509  | wsnp_Ex_rep_c68183_66958099  | 38.9 |
| 309 | 1A | 79276 | IWA5320  | wsnp_Ex_rep_c66875_65276404  | 38.9 |
| 310 | 1A | 79127 | IWA5140  | wsnp_Ex_rep_c105541_89932598 | 38.9 |
| 311 | 1A | 78679 | IWA4579  | wsnp_Ex_c6826_11775106       | 38.9 |
| 312 | 1A | 78464 | IWA4302  | wsnp_Ex_c5634_9907829        | 38.9 |
| 313 | 1A | 78463 | IWA4301  | wsnp_Ex_c5634_9906981        | 38.9 |
| 314 | 1A | 78051 | IWA3766  | wsnp_Ex_c41237_48104282      | 38.9 |
| 315 | 1A | 77345 | IWA2854  | wsnp_Ex_c2389_4479352        | 38.9 |
| 316 | 1A | 77344 | IWA2853  | wsnp_Ex_c2389_4479047        | 38.9 |
| 317 | 1A | 77340 | IWA2849  | wsnp_Ex_c2389_4477621        | 38.9 |
| 318 | 1A | 76700 | IWA1990  | wsnp_Ex_c15188_23387523      | 38.9 |
| 319 | 1A | 65824 | IWB65824 | TA004365-0417                | 38.9 |

|     |    |       |          |                           |      |
|-----|----|-------|----------|---------------------------|------|
| 320 | 1A | 65010 | IWB65010 | RFL_Contig5450_993        | 38.9 |
| 321 | 1A | 62689 | IWB62689 | RAC875_rep_c70404_755     | 38.9 |
| 322 | 1A | 61408 | IWB61408 | RAC875_rep_c105092_114    | 38.9 |
| 323 | 1A | 60332 | IWB60332 | RAC875_c7305_75           | 38.9 |
| 324 | 1A | 58896 | IWB58896 | RAC875_c53095_51          | 38.9 |
| 325 | 1A | 55795 | IWB55795 | RAC875_c25442_231         | 38.9 |
| 326 | 1A | 51646 | IWB51646 | Ra_c26970_1740            | 38.9 |
| 327 | 1A | 50397 | IWB50397 | Kukri_rep_c81206_235      | 38.9 |
| 328 | 1A | 43481 | IWB43481 | Kukri_c27717_316          | 38.9 |
| 329 | 1A | 42800 | IWB42800 | Kukri_c23382_1431         | 38.9 |
| 330 | 1A | 35297 | IWB35297 | IAAV7131                  | 38.9 |
| 331 | 1A | 31842 | IWB31842 | GENE-0379_108             | 38.9 |
| 332 | 1A | 31787 | IWB31787 | GENE-0287_28              | 38.9 |
| 333 | 1A | 31507 | IWB31507 | Excalibur_s107771_77      | 38.9 |
| 334 | 1A | 27755 | IWB27755 | Excalibur_c57766_92       | 38.9 |
| 335 | 1A | 76558 | IWA1807  | wsnp_Ex_c1374_2630879     | 38.9 |
| 336 | 1A | 76543 | IWA1785  | wsnp_Ex_c13564_21327699   | 38.9 |
| 337 | 1A | 80963 | IWA7677  | wsnp_Ra_c18045_27024765   | 38.9 |
| 338 | 1A | 79788 | IWA6044  | wsnp_JD_c40990_29127031   | 38.9 |
| 339 | 1A | 77870 | IWA3536  | wsnp_Ex_c3572_6531810     | 38.9 |
| 340 | 1A | 77187 | IWA2630  | wsnp_Ex_c21592_30743815   | 38.9 |
| 341 | 1A | 13493 | IWB13493 | CAP12_c6266_339           | 38.9 |
| 342 | 1A | 44145 | IWB44145 | Kukri_c32885_145          | 38.9 |
| 343 | 1A | 21584 | IWB21584 | Excalibur_c102582_360     | 38.9 |
| 344 | 1A | 78144 | IWA3884  | wsnp_Ex_c44049_50205904   | 38.9 |
| 345 | 1A | 77817 | IWA3473  | wsnp_Ex_c34260_42602746   | 38.9 |
| 346 | 1A | 59770 | IWB59770 | RAC875_c6338_2719         | 38.9 |
| 347 | 1A | 57676 | IWB57676 | RAC875_c41113_144         | 38.9 |
| 348 | 1A | 54694 | IWB54694 | RAC875_c18539_1159        | 38.9 |
| 349 | 1A | 39871 | IWB39871 | Ku_c6979_182              | 38.9 |
| 350 | 1A | 23847 | IWB23847 | Excalibur_c22728_610      | 38.9 |
| 351 | 1A | 21835 | IWB21835 | Excalibur_c11273_284      | 38.9 |
| 352 | 1A | 20606 | IWB20606 | Ex_c3799_2429             | 38.9 |
| 353 | 1A | 19850 | IWB19850 | Ex_c14515_218             | 38.9 |
| 354 | 1A | 14948 | IWB14948 | CAP8_c806_297             | 38.9 |
| 355 | 1A | 3358  | IWB3358  | BobWhite_c44224_71        | 38.9 |
| 356 | 1A | 30170 | IWB30170 | Excalibur_rep_c106065_511 | 38.9 |
| 357 | 1A | 36350 | IWB36350 | IACX9106                  | 38.9 |
| 358 | 1A | 9345  | IWB9345  | BS00064679_51             | 38.9 |
| 359 | 1A | 78690 | IWA4591  | wsnp_Ex_c6934_11953178    | 38.9 |
| 360 | 1A | 77715 | IWA3337  | wsnp_Ex_c3142_5808220     | 38.9 |
| 361 | 1A | 63072 | IWB63072 | RAC875_rep_c76047_63      | 38.9 |
| 362 | 1A | 21346 | IWB21346 | Ex_c801_555               | 38.9 |
| 363 | 1A | 3462  | IWB3462  | BobWhite_c45409_389       | 38.9 |
| 364 | 1A | 80416 | IWA6942  | wsnp_Ku_c3468_6420199     | 38.9 |
| 365 | 1A | 38904 | IWB38904 | Ku_c2449_578              | 38.9 |
| 366 | 1A | 35084 | IWB35084 | IAAV5756                  | 38.9 |
| 367 | 1A | 77343 | IWA2852  | wsnp_Ex_c2389_4478587     | 38.9 |
| 368 | 1A | 77338 | IWA2847  | wsnp_Ex_c2389_4477096     | 38.9 |
| 369 | 1A | 20215 | IWB20215 | Ex_c2389_1634             | 38.9 |
| 370 | 1A | 77989 | IWA3686  | wsnp_Ex_c3963_7179957     | 38.9 |
| 371 | 1A | 20216 | IWB20216 | Ex_c2389_1828             | 38.9 |
| 372 | 1A | 8490  | IWB8490  | BS00048117_51             | 38.9 |
| 373 | 1A | 77558 | IWA3147  | wsnp_Ex_c28165_37310070   | 38.9 |

|     |    |       |          |                              |      |
|-----|----|-------|----------|------------------------------|------|
| 374 | 1A | 59768 | IWB59768 | RAC875_c6338_1887            | 38.9 |
| 375 | 1A | 80448 | IWA6985  | wsnp_Ku_c3844_7053669        | 38.9 |
| 376 | 1A | 13492 | IWB13492 | CAP12_c6266_298              | 38.9 |
| 377 | 1A | 13491 | IWB13491 | CAP12_c6266_187              | 38.9 |
| 378 | 1A | 65705 | IWB65705 | TA003542-0511                | 38.9 |
| 379 | 1A | 60215 | IWB60215 | RAC875_c68797_400            | 38.9 |
| 380 | 1A | 53086 | IWB53086 | RAC875_c10506_434            | 38.9 |
| 381 | 1A | 81337 | IWA8198  | wsnp_Ra_rep_c74936_72685894  | 38.9 |
| 382 | 1A | 77871 | IWA3538  | wsnp_Ex_c3572_6533892        | 38.9 |
| 383 | 1A | 77186 | IWA2629  | wsnp_Ex_c21592_30743513      | 38.9 |
| 384 | 1A | 31366 | IWB31366 | Excalibur_rep_c86757_244     | 39.5 |
| 385 | 1A | 27889 | IWB27889 | Excalibur_c59486_172         | 39.8 |
| 386 | 1A | 48847 | IWB48847 | Kukri_rep_c103147_745        | 40.1 |
| 387 | 1A | 22518 | IWB22518 | Excalibur_c14943_695         | 40.1 |
| 388 | 1A | 75360 | IWA42    | wsnp_BE403956A_Ta_2_3        | 40.3 |
| 389 | 1A | 6779  | IWB6779  | BS00021878_51                | 40.3 |
| 390 | 1A | 8273  | IWB8273  | BS00041358_51                | 40.3 |
| 391 | 1A | 9465  | IWB9465  | BS00065146_51                | 40.3 |
| 392 | 1A | 16658 | IWB16658 | D_contig35755_111            | 40.3 |
| 393 | 1A | 53037 | IWB53037 | RAC875_c10400_791            | 40.3 |
| 394 | 1A | 53598 | IWB53598 | RAC875_c12808_182            | 40.3 |
| 395 | 1A | 65452 | IWB65452 | TA001772-0625                | 40.3 |
| 396 | 1A | 78677 | IWA4577  | wsnp_Ex_c6817_11762714       | 40.3 |
| 397 | 1A | 79021 | IWA5010  | wsnp_Ex_rep_c101414_86780996 | 40.3 |
| 398 | 1A | 80440 | IWA6971  | wsnp_Ku_c37925_46678703      | 40.3 |
| 399 | 1A | 80512 | IWA7065  | wsnp_Ku_c4413_8008008        | 40.3 |
| 400 | 1A | 414   | IWB414   | BobWhite_c12841_56           | 40.3 |
| 401 | 1A | 21126 | IWB21126 | Ex_c6765_2118                | 40.3 |
| 402 | 1A | 35883 | IWB35883 | IACX293                      | 40.3 |
| 403 | 1A | 48626 | IWB48626 | Kukri_rep_c101316_375        | 40.3 |
| 404 | 1A | 49136 | IWB49136 | Kukri_rep_c106037_96         | 40.3 |
| 405 | 1A | 55677 | IWB55677 | RAC875_c24560_604            | 40.3 |
| 406 | 1A | 35410 | IWB35410 | IAAV7929                     | 40.3 |
| 407 | 1A | 76140 | IWA1279  | wsnp_Ex_c10100_16600633      | 40.3 |
| 408 | 1A | 77996 | IWA3695  | wsnp_Ex_c3986_7217641        | 40.3 |
| 409 | 1A | 81162 | IWA7945  | wsnp_Ra_c4481_8119609        | 40.3 |
| 410 | 1A | 11893 | IWB11893 | BS00094681_51                | 40.3 |
| 411 | 1A | 78198 | IWA3956  | wsnp_Ex_c4605_8240189        | 40.3 |
| 412 | 1A | 80441 | IWA6972  | wsnp_Ku_c37925_46679146      | 40.3 |
| 413 | 1A | 10918 | IWB10918 | BS00077199_51                | 40.3 |
| 414 | 1A | 46963 | IWB46963 | Kukri_c61766_907             | 40.3 |
| 415 | 1A | 53107 | IWB53107 | RAC875_c105730_397           | 40.3 |
| 416 | 1A | 77435 | IWA2981  | wsnp_Ex_c25628_34888253      | 40.3 |
| 417 | 1A | 35945 | IWB35945 | IACX4168                     | 40.3 |
| 418 | 1A | 78197 | IWA3955  | wsnp_Ex_c4605_8239915        | 40.3 |
| 419 | 1A | 81214 | IWA8026  | wsnp_Ra_c6182_10833256       | 40.3 |
| 420 | 1A | 43760 | IWB43760 | Kukri_c29668_338             | 40.3 |
| 421 | 1A | 49698 | IWB49698 | Kukri_rep_c115954_137        | 40.3 |
| 422 | 1A | 79036 | IWA5031  | wsnp_Ex_rep_c101746_87053634 | 40.3 |
| 423 | 1A | 12595 | IWB12595 | BS00110766_51                | 40.3 |
| 424 | 1A | 66112 | IWB66112 | TA013367-0455                | 40.3 |
| 425 | 1A | 25621 | IWB25621 | Excalibur_c3565_2673         | 40.3 |
| 426 | 1A | 56573 | IWB56573 | RAC875_c31168_238            | 40.3 |
| 427 | 1A | 77863 | IWA3528  | wsnp_Ex_c35563_43690084      | 40.3 |



|     |    |       |          |                              |      |
|-----|----|-------|----------|------------------------------|------|
| 428 | 1A | 79079 | IWA5083  | wsnp_Ex_rep_c103087_88123733 | 40.3 |
| 429 | 1A | 30251 | IWB30251 | Excalibur_rep_c107144_405    | 40.3 |
| 430 | 1A | 31640 | IWB31640 | GENE-0053_224                | 40.3 |
| 431 | 1A | 40764 | IWB40764 | Kukri_c12165_1148            | 40.3 |
| 432 | 1A | 77436 | IWA2982  | wsnp_Ex_c25628_34888439      | 40.3 |
| 433 | 1A | 77867 | IWA3533  | wsnp_Ex_c3565_6521098        | 40.3 |
| 434 | 1A | 79080 | IWA5084  | wsnp_Ex_rep_c103087_88124573 | 40.3 |
| 435 | 1A | 79235 | IWA5268  | wsnp_Ex_rep_c66562_64849366  | 40.3 |
| 436 | 1A | 80543 | IWA7104  | wsnp_Ku_c47386_53862969      | 40.3 |
| 437 | 1A | 42121 | IWB42121 | Kukri_c19389_97              | 40.3 |
| 438 | 1A | 77973 | IWA3666  | wsnp_Ex_c3906_7086294        | 40.3 |
| 439 | 1A | 10292 | IWB10292 | BS00068358_51                | 40.3 |
| 440 | 1A | 78439 | IWA4265  | wsnp_Ex_c5543_9763520        | 40.3 |
| 441 | 1A | 30625 | IWB30625 | Excalibur_rep_c113303_500    | 40.3 |
| 442 | 1A | 78676 | IWA4576  | wsnp_Ex_c6817_11761300       | 40.3 |
| 443 | 1A | 71889 | IWB71889 | Tdurum_contig48416_335       | 40.3 |
| 444 | 1A | 14772 | IWB14772 | CAP8_c4897_397               | 40.3 |
| 445 | 1A | 55848 | IWB55848 | RAC875_c25799_457            | 40.3 |
| 446 | 1A | 3707  | IWB3707  | BobWhite_c4942_140           | 40.6 |
| 447 | 1A | 31887 | IWB31887 | GENE-0446_243                | 40.6 |
| 448 | 1A | 31781 | IWB31781 | GENE-0283_330                | 40.6 |
| 449 | 1A | 65579 | IWB65579 | TA002594-0782                | 41.2 |
| 450 | 1A | 64970 | IWB64970 | RFL_Contig530_2305           | 41.2 |
| 451 | 1A | 60037 | IWB60037 | RAC875_c6664_63              | 42.0 |
| 452 | 1A | 35842 | IWB35842 | IACX219                      | 42.0 |
| 453 | 1A | 42791 | IWB42791 | Kukri_c23350_433             | 42.0 |
| 454 | 1A | 20671 | IWB20671 | Ex_c4121_1205                | 42.0 |
| 455 | 1A | 35117 | IWB35117 | IAAV5939                     | 42.0 |
| 456 | 1A | 76159 | IWA1307  | wsnp_Ex_c10257_16825240      | 42.0 |
| 457 | 1A | 2927  | IWB2927  | BobWhite_c37802_547          | 42.0 |
| 458 | 1A | 76623 | IWA1888  | wsnp_Ex_c14361_22341570      | 42.0 |
| 459 | 1A | 38877 | IWB38877 | Ku_c23960_333                | 42.0 |
| 460 | 1A | 19752 | IWB19752 | Ex_c12584_2014               | 42.0 |
| 461 | 1A | 20307 | IWB20307 | Ex_c25689_1606               | 42.0 |
| 462 | 1A | 52241 | IWB52241 | Ra_c54249_1031               | 42.0 |
| 463 | 1A | 20306 | IWB20306 | Ex_c25689_1603               | 42.0 |
| 464 | 1A | 7929  | IWB7929  | BS00033469_51                | 46.2 |
| 465 | 1A | 21382 | IWB21382 | Ex_c8514_1342                | 46.2 |
| 466 | 1A | 4741  | IWB4741  | BobWhite_rep_c49207_243      | 46.2 |
| 467 | 1A | 8994  | IWB8994  | BS00063068_51                | 46.2 |
| 468 | 1A | 54092 | IWB54092 | RAC875_c15426_1713           | 46.2 |
| 469 | 1A | 20387 | IWB20387 | Ex_c28144_1843               | 46.2 |
| 470 | 1A | 77447 | IWA2995  | wsnp_Ex_c25734_34995416      | 46.2 |
| 471 | 1A | 34506 | IWB34506 | IAAV213                      | 46.2 |
| 472 | 1A | 80597 | IWA7173  | wsnp_Ku_c557_1166684         | 46.2 |
| 473 | 1A | 78456 | IWA4292  | wsnp_Ex_c56097_58352130      | 46.2 |
| 474 | 1A | 52305 | IWB52305 | Ra_c58315_265                | 46.2 |
| 475 | 1A | 35927 | IWB35927 | IACX3496                     | 46.2 |
| 476 | 1A | 57702 | IWB57702 | RAC875_c41275_131            | 46.4 |
| 477 | 1A | 30746 | IWB30746 | Excalibur_rep_c66449_1588    | 48.1 |
| 478 | 1A | 35955 | IWB35955 | IACX4378                     | 48.1 |
| 479 | 1A | 77551 | IWA3134  | wsnp_Ex_c27940_37101775      | 48.1 |
| 480 | 1A | 27052 | IWB27052 | Excalibur_c49421_443         | 48.1 |
| 481 | 1A | 70213 | IWB70213 | Tdurum_contig31304_527       | 48.1 |

|     |    |       |          |                              |      |
|-----|----|-------|----------|------------------------------|------|
| 482 | 1A | 34656 | IWB34656 | IAAV3049                     | 48.1 |
| 483 | 1A | 31604 | IWB31604 | GENE-0004_635                | 48.1 |
| 484 | 1A | 24988 | IWB24988 | Excalibur_c30591_637         | 48.1 |
| 485 | 1A | 12736 | IWB12736 | CAP11_c1972_285              | 48.1 |
| 486 | 1A | 11516 | IWB11516 | BS00087601_51                | 48.1 |
| 487 | 1A | 30576 | IWB30576 | Excalibur_rep_c112145_271    | 48.1 |
| 488 | 1A | 75520 | IWA268   | wsnp_BE495786A_Ta_2_1        | 48.1 |
| 489 | 1A | 54214 | IWB54214 | RAC875_c16080_777            | 48.1 |
| 490 | 1A | 7216  | IWB7216  | BS00022698_51                | 48.1 |
| 491 | 1A | 81125 | IWA7898  | wsnp_Ra_c37745_45806931      | 48.1 |
| 492 | 1A | 77820 | IWA3477  | wsnp_Ex_c34344_42677360      | 48.1 |
| 493 | 1A | 76385 | IWA1594  | wsnp_Ex_c12165_19452361      | 48.1 |
| 494 | 1A | 69488 | IWB69488 | Tdurum_contig28296_243       | 48.1 |
| 495 | 1A | 3806  | IWB3806  | BobWhite_c5356_1272          | 48.1 |
| 496 | 1A | 1228  | IWB1228  | BobWhite_c18881_338          | 48.1 |
| 497 | 1A | 64265 | IWB64265 | RFL_Contig3203_1971          | 48.1 |
| 498 | 1A | 28550 | IWB28550 | Excalibur_c7033_159          | 48.1 |
| 499 | 1A | 80896 | IWA7577  | wsnp_Ra_c12148_19539667      | 48.1 |
| 500 | 1A | 78330 | IWA4126  | wsnp_Ex_c5216_9235964        | 48.1 |
| 501 | 1A | 5360  | IWB5360  | BobWhite_rep_c63278_349      | 48.1 |
| 502 | 1A | 31863 | IWB31863 | GENE-0410_71                 | 51.1 |
| 503 | 1A | 35691 | IWB35691 | IACX11338                    | 51.1 |
| 504 | 1A | 19625 | IWB19625 | Ex_c105443_895               | 52.2 |
| 505 | 1A | 11883 | IWB11883 | BS00094553_51                | 57.7 |
| 506 | 1A | 81102 | IWA7868  | wsnp_Ra_c3270_6136110        | 57.7 |
| 507 | 1A | 49731 | IWB49731 | Kukri_rep_c117029_125        | 57.7 |
| 508 | 1A | 2320  | IWB2320  | BobWhite_c29908_113          | 57.7 |
| 509 | 1A | 81103 | IWA7869  | wsnp_Ra_c3270_6136601        | 57.7 |
| 510 | 1A | 36026 | IWB36026 | IACX5793                     | 57.7 |
| 511 | 1A | 35541 | IWB35541 | IAAV8804                     | 57.7 |
| 512 | 1A | 64537 | IWB64537 | RFL_Contig3919_1348          | 57.7 |
| 513 | 1A | 36076 | IWB36076 | IACX5960                     | 57.7 |
| 514 | 1A | 56355 | IWB56355 | RAC875_c29540_413            | 58.3 |
| 515 | 1A | 56353 | IWB56353 | RAC875_c29540_1109           | 58.3 |
| 516 | 1A | 79151 | IWA5169  | wsnp_Ex_rep_c108951_91954190 | 58.3 |
| 517 | 1A | 7079  | IWB7079  | BS00022432_51                | 58.3 |
| 518 | 1A | 6974  | IWB6974  | BS00022220_51                | 58.8 |
| 519 | 1A | 31939 | IWB31939 | GENE-0511_403                | 58.8 |
| 520 | 1A | 44038 | IWB44038 | Kukri_c31891_1355            | 58.8 |
| 521 | 1A | 77767 | IWA3406  | wsnp_Ex_c32590_41222878      | 58.8 |
| 522 | 1A | 9588  | IWB9588  | BS00065601_51                | 58.8 |
| 523 | 1A | 75965 | IWA931   | wsnp_CAP12_c1960_972031      | 58.8 |
| 524 | 1A | 58517 | IWB58517 | RAC875_c49074_374            | 58.8 |
| 525 | 1A | 13718 | IWB13718 | CAP7_c1083_283               | 58.8 |
| 526 | 1A | 6944  | IWB6944  | BS00022173_51                | 58.8 |
| 527 | 1A | 45341 | IWB45341 | Kukri_c43410_348             | 58.8 |
| 528 | 1A | 49095 | IWB49095 | Kukri_rep_c105589_73         | 58.8 |
| 529 | 1A | 77836 | IWA3496  | wsnp_Ex_c3475_6362087        | 58.8 |
| 530 | 1A | 59527 | IWB59527 | RAC875_c60514_90             | 58.8 |
| 531 | 1A | 46385 | IWB46385 | Kukri_c53935_265             | 58.8 |
| 532 | 1A | 43647 | IWB43647 | Kukri_c29121_226             | 58.8 |
| 533 | 1A | 40889 | IWB40889 | Kukri_c12758_617             | 58.8 |
| 534 | 1A | 11543 | IWB11543 | BS00088035_51                | 58.8 |
| 535 | 1A | 11087 | IWB11087 | BS00079538_51                | 58.8 |

|     |    |       |          |                         |      |
|-----|----|-------|----------|-------------------------|------|
| 536 | 1A | 3489  | IWB3489  | BobWhite_c46007_582     | 58.8 |
| 537 | 1A | 56065 | IWB56065 | RAC875_c27417_150       | 58.8 |
| 538 | 1A | 7753  | IWB7753  | BS00030036_51           | 58.8 |
| 539 | 1A | 78622 | IWA4511  | wsnp_Ex_c6452_11213329  | 58.8 |
| 540 | 1A | 46448 | IWB46448 | Kukri_c54678_88         | 58.8 |
| 541 | 1A | 77124 | IWA2540  | wsnp_Ex_c20489_29564938 | 58.8 |
| 542 | 1A | 45961 | IWB45961 | Kukri_c49170_655        | 59.4 |
| 543 | 1A | 77085 | IWA2491  | wsnp_Ex_c1997_3757721   | 59.4 |
| 544 | 1A | 77244 | IWA2703  | wsnp_Ex_c22284_31478675 | 59.4 |
| 545 | 1A | 35171 | IWB35171 | IAAV6234                | 59.4 |
| 546 | 1A | 40049 | IWB40049 | Ku_c809_2419            | 59.4 |
| 547 | 1A | 79854 | IWA6144  | wsnp_JD_c6544_7697235   | 59.4 |
| 548 | 1A | 77081 | IWA2485  | wsnp_Ex_c1997_3756118   | 59.4 |
| 549 | 1A | 60627 | IWB60627 | RAC875_c80876_67        | 59.4 |
| 550 | 1A | 49402 | IWB49402 | Kukri_rep_c109473_80    | 59.4 |
| 551 | 1A | 33406 | IWB33406 | GENE-3454_74            | 59.4 |
| 552 | 1A | 79855 | IWA6145  | wsnp_JD_c6544_7697412   | 59.4 |
| 553 | 1A | 38172 | IWB38172 | Ku_c10813_1122          | 59.4 |
| 554 | 1A | 36631 | IWB36631 | Jagger_c5280_407        | 59.4 |
| 555 | 1A | 52379 | IWB52379 | Ra_c64515_242           | 59.4 |
| 556 | 1A | 79856 | IWA6146  | wsnp_JD_c6544_7697578   | 59.4 |
| 557 | 1A | 77083 | IWA2489  | wsnp_Ex_c1997_3757496   | 59.4 |
| 558 | 1A | 80253 | IWA6729  | wsnp_Ku_c23012_32893918 | 59.7 |
| 559 | 1A | 13265 | IWB13265 | CAP12_c1979_117         | 59.9 |
| 560 | 1A | 65551 | IWB65551 | TA002402-1350           | 60.2 |
| 561 | 1A | 26566 | IWB26566 | Excalibur_c44668_382    | 60.2 |
| 562 | 1A | 11547 | IWB11547 | BS00088136_51           | 60.2 |
| 563 | 1A | 34600 | IWB34600 | IAAV2694                | 62.2 |
| 564 | 1A | 55    | IWB55    | BobWhite_c104_89        | 62.2 |
| 565 | 1A | 77125 | IWA2541  | wsnp_Ex_c20495_29571203 | 63.0 |
| 566 | 1A | 77718 | IWA3340  | wsnp_Ex_c3145_5812670   | 63.0 |
| 567 | 1A | 31945 | IWB31945 | GENE-0527_92            | 63.9 |
| 568 | 1A | 28682 | IWB28682 | Excalibur_c7370_179     | 63.9 |
| 569 | 1A | 75699 | IWA530   | wsnp_BG263358A_Ta_2_1   | 64.1 |
| 570 | 1A | 75700 | IWA531   | wsnp_BG263358A_Ta_2_3   | 64.1 |
| 571 | 1A | 38341 | IWB38341 | Ku_c12688_352           | 64.1 |
| 572 | 1A | 13749 | IWB13749 | CAP7_c11581_78          | 65.3 |
| 573 | 1A | 36553 | IWB36553 | Jagger_c3646_235        | 65.3 |
| 574 | 1A | 63334 | IWB63334 | RAC875_rep_c95460_302   | 65.3 |
| 575 | 1A | 6029  | IWB6029  | BS00009104_51           | 67.3 |
| 576 | 1A | 21700 | IWB21700 | Excalibur_c1066_303     | 67.3 |
| 577 | 1A | 78645 | IWA4538  | wsnp_Ex_c6563_11378915  | 67.3 |
| 578 | 1A | 52960 | IWB52960 | RAC875_c102343_204      | 67.3 |
| 579 | 1A | 7676  | IWB7676  | BS00028146_51           | 67.3 |
| 580 | 1A | 76041 | IWA1081  | wsnp_CAP7_c3472_1623955 | 67.3 |
| 581 | 1A | 12479 | IWB12479 | BS00110130_51           | 68.1 |
| 582 | 1A | 55855 | IWB55855 | RAC875_c25814_361       | 68.7 |
| 583 | 1A | 12315 | IWB12315 | BS00107306_51           | 68.7 |
| 584 | 1A | 12579 | IWB12579 | BS00110627_51           | 68.7 |
| 585 | 1A | 7289  | IWB7289  | BS00022848_51           | 68.9 |
| 586 | 1A | 59223 | IWB59223 | RAC875_c56690_320       | 69.2 |
| 587 | 1A | 10668 | IWB10668 | BS00073413_51           | 69.5 |
| 588 | 1A | 81018 | IWA7754  | wsnp_Ra_c22110_31550370 | 69.8 |
| 589 | 1A | 29579 | IWB29579 | Excalibur_c97157_137    | 69.8 |

|     |    |       |          |                              |      |
|-----|----|-------|----------|------------------------------|------|
| 590 | 1A | 65422 | IWB65422 | TA001600-1603                | 69.8 |
| 591 | 1A | 23855 | IWB23855 | Excalibur_c22768_963         | 69.8 |
| 592 | 1A | 36087 | IWB36087 | IACX5994                     | 69.8 |
| 593 | 1A | 77789 | IWA3434  | wsnp_Ex_c33452_41938013      | 69.8 |
| 594 | 1A | 78075 | IWA3805  | wsnp_Ex_c41953_48658353      | 69.8 |
| 595 | 1A | 4307  | IWB4307  | BobWhite_c721_74             | 69.8 |
| 596 | 1A | 62911 | IWB62911 | RAC875_rep_c72890_63         | 69.8 |
| 597 | 1A | 78074 | IWA3804  | wsnp_Ex_c41953_48657850      | 69.8 |
| 598 | 1A | 47502 | IWB47502 | Kukri_c7119_392              | 69.8 |
| 599 | 1A | 55184 | IWB55184 | RAC875_c21411_162            | 69.8 |
| 600 | 1A | 35025 | IWB35025 | IAAV544                      | 69.8 |
| 601 | 1A | 79787 | IWA6042  | wsnp_JD_c3973_5044238        | 69.8 |
| 602 | 1A | 4075  | IWB4075  | BobWhite_c6046_304           | 69.8 |
| 603 | 1A | 31650 | IWB31650 | GENE-0069_107                | 69.8 |
| 604 | 1A | 77790 | IWA3435  | wsnp_Ex_c33452_41938159      | 69.8 |
| 605 | 1A | 29580 | IWB29580 | Excalibur_c97157_65          | 69.8 |
| 606 | 1A | 50892 | IWB50892 | Ra_c110766_321               | 70.6 |
| 607 | 1A | 3160  | IWB3160  | BobWhite_c41272_159          | 70.9 |
| 608 | 1A | 75424 | IWA136   | wsnp_BE443588A_Ta_2_2        | 70.9 |
| 609 | 1A | 75423 | IWA135   | wsnp_BE443588A_Ta_2_1        | 70.9 |
| 610 | 1A | 78203 | IWA3962  | wsnp_Ex_c4612_8254533        | 70.9 |
| 611 | 1A | 31625 | IWB31625 | GENE-0033_233                | 70.9 |
| 612 | 1A | 72493 | IWB72493 | Tdurum_contig56158_60        | 70.9 |
| 613 | 1A | 64983 | IWB64983 | RFL_Contig5334_1969          | 70.9 |
| 614 | 1A | 79050 | IWA5047  | wsnp_Ex_rep_c102067_87314043 | 70.9 |
| 615 | 1A | 73951 | IWB73951 | Tdurum_contig96086_74        | 70.9 |
| 616 | 1A | 53529 | IWB53529 | RAC875_c12348_720            | 70.9 |
| 617 | 1A | 1562  | IWB1562  | BobWhite_c22134_398          | 71.4 |
| 618 | 1A | 68854 | IWB68854 | Tdurum_contig20183_507       | 71.4 |
| 619 | 1A | 75825 | IWA691   | wsnp_CAP11_c1815_982483      | 71.4 |
| 620 | 1A | 20162 | IWB20162 | Ex_c2226_244                 | 71.4 |
| 621 | 1A | 10300 | IWB10300 | BS00068391_51                | 71.4 |
| 622 | 1A | 10986 | IWB10986 | BS00078085_51                | 71.4 |
| 623 | 1A | 75206 | IWB75206 | tplb0059d21_1032             | 71.4 |
| 624 | 1A | 11109 | IWB11109 | BS00080076_51                | 71.4 |
| 625 | 1A | 56724 | IWB56724 | RAC875_c32379_216            | 71.4 |
| 626 | 1A | 11932 | IWB11932 | BS00095510_51                | 71.4 |
| 627 | 1A | 72959 | IWB72959 | Tdurum_contig63715_235       | 72.2 |
| 628 | 1A | 66484 | IWB66484 | Tdurum_contig10365_341       | 72.2 |
| 629 | 1A | 68479 | IWB68479 | Tdurum_contig15967_90        | 72.2 |
| 630 | 1A | 54223 | IWB54223 | RAC875_c16136_129            | 72.8 |
| 631 | 1A | 13164 | IWB13164 | CAP11_s8920_357              | 72.8 |
| 632 | 1A | 36967 | IWB36967 | JD_c13024_360                | 72.8 |
| 633 | 1A | 5566  | IWB5566  | BobWhite_rep_c65812_710      | 72.8 |
| 634 | 1A | 79816 | IWA6081  | wsnp_JD_c4904_6034093        | 72.8 |
| 635 | 1A | 34750 | IWB34750 | IAAV3650                     | 72.8 |
| 636 | 1A | 79287 | IWA5333  | wsnp_Ex_rep_c66919_65342127  | 72.8 |
| 637 | 1A | 79601 | IWA5754  | wsnp_Ex_rep_c81556_76277906  | 72.8 |
| 638 | 1A | 79649 | IWA5822  | wsnp_JD_c13024_13129681      | 72.8 |
| 639 | 1A | 46495 | IWB46495 | Kukri_c55266_242             | 72.8 |
| 640 | 1A | 59500 | IWB59500 | RAC875_c60162_129            | 72.8 |
| 641 | 1A | 76104 | IWA1225  | wsnp_CAP8_rep_c3938_1936666  | 72.8 |
| 642 | 1A | 1856  | IWB1856  | BobWhite_c24825_349          | 72.8 |
| 643 | 1A | 34672 | IWB34672 | IAAV3156                     | 72.8 |

|     |    |       |          |                         |      |
|-----|----|-------|----------|-------------------------|------|
| 644 | 1A | 73305 | IWB73305 | Tdurum_contig75762_377  | 72.8 |
| 645 | 1A | 73306 | IWB73306 | Tdurum_contig75762_406  | 72.8 |
| 646 | 1A | 72556 | IWB72556 | Tdurum_contig5711_174   | 72.8 |
| 647 | 1A | 70514 | IWB70514 | Tdurum_contig34826_234  | 73.1 |
| 648 | 1A | 75349 | IWA24    | wsnp_BE403322A_Ta_1_1   | 73.3 |
| 649 | 1A | 39248 | IWB39248 | Ku_c3523_1959           | 73.3 |
| 650 | 1A | 27962 | IWB27962 | Excalibur_c60388_189    | 73.6 |
| 651 | 1A | 77557 | IWA3146  | wsnp_Ex_c28149_37293173 | 73.6 |
| 652 | 1A | 36607 | IWB36607 | Jagger_c468_53          | 76.9 |
| 653 | 1A | 4804  | IWB4804  | BobWhite_rep_c49755_131 | 76.9 |
| 654 | 1A | 9746  | IWB9746  | BS00066212_51           | 78.0 |
| 655 | 1A | 42176 | IWB42176 | Kukri_c19653_1370       | 78.0 |
| 656 | 1A | 52033 | IWB52033 | Ra_c41164_730           | 78.3 |
| 657 | 1A | 52277 | IWB52277 | Ra_c5683_2584           | 78.3 |
| 658 | 1A | 37168 | IWB37168 | JD_c20553_448           | 78.3 |
| 659 | 1A | 79703 | IWA5910  | wsnp_JD_c20553_18260620 | 78.3 |
| 660 | 1A | 37296 | IWB37296 | JD_c285_1438            | 78.9 |
| 661 | 1A | 66930 | IWB66930 | Tdurum_contig11106_264  | 80.3 |
| 662 | 1A | 66931 | IWB66931 | Tdurum_contig11106_340  | 80.3 |
| 663 | 1B | 8589  | IWB8589  | BS00050522_51           | 0.0  |
| 664 | 1B | 7273  | IWB7273  | BS00022820_51           | 0.3  |
| 665 | 1B | 21697 | IWB21697 | Excalibur_c10657_1280   | 0.3  |
| 666 | 1B | 45437 | IWB45437 | Kukri_c44369_131        | 0.3  |
| 667 | 1B | 23711 | IWB23711 | Excalibur_c21898_1423   | 0.6  |
| 668 | 1B | 11788 | IWB11788 | BS00093078_51           | 0.8  |
| 669 | 1B | 21698 | IWB21698 | Excalibur_c10657_796    | 0.8  |
| 670 | 1B | 42054 | IWB42054 | Kukri_c18951_493        | 1.1  |
| 671 | 1B | 11290 | IWB11290 | BS00083177_51           | 6.8  |
| 672 | 1B | 33252 | IWB33252 | GENE-3142_72            | 6.8  |
| 673 | 1B | 7123  | IWB7123  | BS00022505_51           | 6.8  |
| 674 | 1B | 49209 | IWB49209 | Kukri_rep_c106834_139   | 6.8  |
| 675 | 1B | 47800 | IWB47800 | Kukri_c79308_278        | 6.8  |
| 676 | 1B | 9761  | IWB9761  | BS00066271_51           | 8.8  |
| 677 | 1B | 6303  | IWB6303  | BS00010868_51           | 8.8  |
| 678 | 1B | 7109  | IWB7109  | BS00022482_51           | 8.8  |
| 679 | 1B | 36466 | IWB36466 | Jagger_c1888_277        | 8.8  |
| 680 | 1B | 25090 | IWB25090 | Excalibur_c31375_558    | 8.8  |
| 681 | 1B | 12632 | IWB12632 | BS00111170_51           | 8.8  |
| 682 | 1B | 47978 | IWB47978 | Kukri_c8390_1102        | 8.8  |
| 683 | 1B | 56773 | IWB56773 | RAC875_c32874_1101      | 8.8  |
| 684 | 1B | 26464 | IWB26464 | Excalibur_c43567_633    | 8.8  |
| 685 | 1B | 26242 | IWB26242 | Excalibur_c415_844      | 8.8  |
| 686 | 1B | 61101 | IWB61101 | RAC875_c9457_457        | 10.4 |
| 687 | 1B | 11925 | IWB11925 | BS00095286_51           | 10.4 |
| 688 | 1B | 28576 | IWB28576 | Excalibur_c71158_117    | 10.4 |
| 689 | 1B | 34715 | IWB34715 | IAAV3430                | 10.7 |
| 690 | 1B | 40116 | IWB40116 | Ku_c8810_895            | 10.7 |
| 691 | 1B | 6905  | IWB6905  | BS00022101_51           | 10.7 |
| 692 | 1B | 75373 | IWA61    | wsnp_BE405749B_Ta_2_1   | 10.7 |
| 693 | 1B | 5995  | IWB5995  | BS00005004_51           | 10.7 |
| 694 | 1B | 12157 | IWB12157 | BS00100994_51           | 11.2 |
| 695 | 1B | 5922  | IWB5922  | BS00003917_51           | 11.2 |
| 696 | 1B | 7368  | IWB7368  | BS00023004_51           | 11.2 |
| 697 | 1B | 44529 | IWB44529 | Kukri_c36151_170        | 11.2 |

|     |    |       |          |                         |      |
|-----|----|-------|----------|-------------------------|------|
| 698 | 1B | 57219 | IWB57219 | RAC875_c3692_2287       | 11.2 |
| 699 | 1B | 39278 | IWB39278 | Ku_c36151_460           | 11.5 |
| 700 | 1B | 6008  | IWB6008  | BS00006820_51           | 12.1 |
| 701 | 1B | 17979 | IWB17979 | D_GB5Y7FA01BMOJY_241    | 12.1 |
| 702 | 1B | 31615 | IWB31615 | GENE-0019_1155          | 12.1 |
| 703 | 1B | 35936 | IWB35936 | IACX3811                | 12.1 |
| 704 | 1B | 38368 | IWB38368 | Ku_c1312_1194           | 12.1 |
| 705 | 1B | 59785 | IWB59785 | RAC875_c63624_753       | 12.1 |
| 706 | 1B | 68307 | IWB68307 | Tdurum_contig14847_144  | 12.1 |
| 707 | 1B | 71754 | IWB71754 | Tdurum_contig47083_278  | 12.1 |
| 708 | 1B | 5992  | IWB5992  | BS00004903_51           | 12.1 |
| 709 | 1B | 12208 | IWB12208 | BS00103677_51           | 12.1 |
| 710 | 1B | 73112 | IWB73112 | Tdurum_contig68637_256  | 12.1 |
| 711 | 1B | 12603 | IWB12603 | BS00110900_51           | 12.1 |
| 712 | 1B | 65827 | IWB65827 | TA004380-0460           | 12.1 |
| 713 | 1B | 10312 | IWB10312 | BS00068429_51           | 12.1 |
| 714 | 1B | 26731 | IWB26731 | Excalibur_c46114_572    | 12.1 |
| 715 | 1B | 43758 | IWB43758 | Kukri_c29655_194        | 12.1 |
| 716 | 1B | 52473 | IWB52473 | Ra_c69552_1419          | 12.1 |
| 717 | 1B | 10492 | IWB10492 | BS00070706_51           | 12.1 |
| 718 | 1B | 65069 | IWB65069 | RFL_Contig5637_1008     | 12.1 |
| 719 | 1B | 75613 | IWA406   | wsnp_BE637971B-Ta_1_20  | 12.1 |
| 720 | 1B | 47908 | IWB47908 | Kukri_c8211_401         | 12.1 |
| 721 | 1B | 9378  | IWB9378  | BS00064829_51           | 12.1 |
| 722 | 1B | 72908 | IWB72908 | Tdurum_contig62624_190  | 12.1 |
| 723 | 1B | 12602 | IWB12602 | BS00110896_51           | 12.1 |
| 724 | 1B | 9956  | IWB9956  | BS00067097_51           | 12.1 |
| 725 | 1B | 72083 | IWB72083 | Tdurum_contig50555_1144 | 12.1 |
| 726 | 1B | 72085 | IWB72085 | Tdurum_contig50555_944  | 12.1 |
| 727 | 1B | 9349  | IWB9349  | BS00064698_51           | 12.4 |
| 728 | 1B | 73358 | IWB73358 | Tdurum_contig76266_134  | 12.6 |
| 729 | 1B | 20111 | IWB20111 | Ex_c21139_812           | 14.3 |
| 730 | 1B | 9714  | IWB9714  | BS00066092_51           | 14.3 |
| 731 | 1B | 11202 | IWB11202 | BS00081680_51           | 15.8 |
| 732 | 1B | 14060 | IWB14060 | CAP7_c3847_204          | 15.8 |
| 733 | 1B | 12475 | IWB12475 | BS00110121_51           | 17.2 |
| 734 | 1B | 8104  | IWB8104  | BS00037387_51           | 17.2 |
| 735 | 1B | 72109 | IWB72109 | Tdurum_contig50667_671  | 17.2 |
| 736 | 1B | 616   | IWB616   | BobWhite_c14271_1379    | 17.2 |
| 737 | 1B | 3042  | IWB3042  | BobWhite_c39269_243     | 17.2 |
| 738 | 1B | 34847 | IWB34847 | IAAV4194                | 17.2 |
| 739 | 1B | 80296 | IWA6787  | wsnp_Ku_c2620_4980121   | 18.9 |
| 740 | 1B | 78502 | IWA4349  | wsnp_Ex_c5780_10153638  | 18.9 |
| 741 | 1B | 34093 | IWB34093 | GENE-4668_244           | 19.8 |
| 742 | 1B | 28467 | IWB28467 | Excalibur_c6726_357     | 19.8 |
| 743 | 1B | 25424 | IWB25424 | Excalibur_c34148_481    | 19.8 |
| 744 | 1B | 22398 | IWB22398 | Excalibur_c14273_1928   | 19.8 |
| 745 | 1B | 64708 | IWB64708 | RFL_Contig4520_770      | 20.9 |
| 746 | 1B | 44363 | IWB44363 | Kukri_c34793_360        | 20.9 |
| 747 | 1B | 77155 | IWA2583  | wsnp_Ex_c2117_3976893   | 20.9 |
| 748 | 1B | 21039 | IWB21039 | Ex_c64327_523           | 20.9 |
| 749 | 1B | 10650 | IWB10650 | BS00073199_51           | 20.9 |
| 750 | 1B | 40093 | IWB40093 | Ku_c8505_1424           | 20.9 |
| 751 | 1B | 9977  | IWB9977  | BS00067169_51           | 20.9 |

|     |    |       |          |                         |      |
|-----|----|-------|----------|-------------------------|------|
| 752 | 1B | 74050 | IWB74050 | Tdurum_contig9874_547   | 20.9 |
| 753 | 1B | 69778 | IWB69778 | Tdurum_contig29380_201  | 20.9 |
| 754 | 1B | 18010 | IWB18010 | D_GB5Y7FA01D7RZC_302    | 20.9 |
| 755 | 1B | 67669 | IWB67669 | Tdurum_contig12598_378  | 20.9 |
| 756 | 1B | 70479 | IWB70479 | Tdurum_contig34049_172  | 20.9 |
| 757 | 1B | 24567 | IWB24567 | Excalibur_c2732_929     | 20.9 |
| 758 | 1B | 71165 | IWB71165 | Tdurum_contig42446_1915 | 20.9 |
| 759 | 1B | 67670 | IWB67670 | Tdurum_contig12598_408  | 20.9 |
| 760 | 1B | 9435  | IWB9435  | BS00065053_51           | 21.4 |
| 761 | 1B | 12279 | IWB12279 | BS00106306_51           | 21.4 |
| 762 | 1B | 9932  | IWB9932  | BS00067003_51           | 21.4 |
| 763 | 1B | 72704 | IWB72704 | Tdurum_contig60037_441  | 21.4 |
| 764 | 1B | 7923  | IWB7923  | BS00033333_51           | 21.4 |
| 765 | 1B | 33689 | IWB33689 | GENE-3956_349           | 21.4 |
| 766 | 1B | 7214  | IWB7214  | BS00022690_51           | 21.7 |
| 767 | 1B | 62640 | IWB62640 | RAC875_rep_c70022_1648  | 21.7 |
| 768 | 1B | 60932 | IWB60932 | RAC875_c8849_134        | 21.7 |
| 769 | 1B | 39999 | IWB39999 | Ku_c7557_633            | 21.7 |
| 770 | 1B | 35739 | IWB35739 | IACX13378               | 21.7 |
| 771 | 1B | 34753 | IWB34753 | IAAV3666                | 21.7 |
| 772 | 1B | 39998 | IWB39998 | Ku_c7557_607            | 21.7 |
| 773 | 1B | 38801 | IWB38801 | Ku_c2189_853            | 21.7 |
| 774 | 1B | 20653 | IWB20653 | Ex_c40520_1484          | 21.7 |
| 775 | 1B | 62561 | IWB62561 | RAC875_rep_c69360_259   | 21.7 |
| 776 | 1B | 11819 | IWB11819 | BS00093736_51           | 21.7 |
| 777 | 1B | 76973 | IWA2345  | wsnp_Ex_c18733_27607958 | 21.7 |
| 778 | 1B | 75635 | IWA435   | wsnp_BF291549B_Ta_1_1   | 21.7 |
| 779 | 1B | 7392  | IWB7392  | BS00023044_51           | 21.7 |
| 780 | 1B | 39683 | IWB39683 | Ku_c5960_496            | 21.7 |
| 781 | 1B | 59519 | IWB59519 | RAC875_c60360_389       | 21.7 |
| 782 | 1B | 31649 | IWB31649 | GENE-0065_444           | 21.7 |
| 783 | 1B | 13527 | IWB13527 | CAP12_c715_102          | 21.7 |
| 784 | 1B | 10361 | IWB10361 | BS00068779_51           | 21.7 |
| 785 | 1B | 40638 | IWB40638 | Kukri_c11587_99         | 21.7 |
| 786 | 1B | 6588  | IWB6588  | BS00013824_51           | 21.7 |
| 787 | 1B | 29154 | IWB29154 | Excalibur_c8600_2080    | 21.7 |
| 788 | 1B | 7545  | IWB7545  | BS00024603_51           | 21.7 |
| 789 | 1B | 65684 | IWB65684 | TA003421-0429           | 21.7 |
| 790 | 1B | 38539 | IWB38539 | Ku_c16382_213           | 21.7 |
| 791 | 1B | 6368  | IWB6368  | BS00011205_51           | 21.7 |
| 792 | 1B | 49541 | IWB49541 | Kukri_rep_c112099_98    | 21.7 |
| 793 | 1B | 66013 | IWB66013 | TA005764-0704           | 21.7 |
| 794 | 1B | 46851 | IWB46851 | Kukri_c6027_66          | 21.7 |
| 795 | 1B | 36080 | IWB36080 | IACX5970                | 21.7 |
| 796 | 1B | 5906  | IWB5906  | BS00003839_51           | 21.7 |
| 797 | 1B | 52125 | IWB52125 | Ra_c455_283             | 21.7 |
| 798 | 1B | 41774 | IWB41774 | Kukri_c17540_394        | 21.7 |
| 799 | 1B | 53143 | IWB53143 | RAC875_c10659_570       | 21.7 |
| 800 | 1B | 35366 | IWB35366 | IAAV7575                | 21.7 |
| 801 | 1B | 32353 | IWB32353 | GENE-1276_68            | 21.7 |
| 802 | 1B | 8572  | IWB8572  | BS00049927_51           | 21.7 |
| 803 | 1B | 56246 | IWB56246 | RAC875_c28894_526       | 21.7 |
| 804 | 1B | 11851 | IWB11851 | BS00094017_51           | 21.7 |
| 805 | 1B | 12387 | IWB12387 | BS00108806_51           | 21.7 |

|     |    |       |          |                             |      |
|-----|----|-------|----------|-----------------------------|------|
| 806 | 1B | 69726 | IWB69726 | Tdurum_contig29169_84       | 21.7 |
| 807 | 1B | 13028 | IWB13028 | CAP11_c6999_233             | 21.7 |
| 808 | 1B | 10636 | IWB10636 | BS00073034_51               | 21.7 |
| 809 | 1B | 81153 | IWA7934  | wsnp_Ra_c4296_7819139       | 21.7 |
| 810 | 1B | 80839 | IWA7504  | wsnp_Ku_rep_c71900_71624324 | 21.7 |
| 811 | 1B | 8023  | IWB8023  | BS00035690_51               | 21.7 |
| 812 | 1B | 7186  | IWB7186  | BS00022625_51               | 21.7 |
| 813 | 1B | 54028 | IWB54028 | RAC875_c14902_256           | 21.7 |
| 814 | 1B | 5835  | IWB5835  | BS00003575_51               | 21.7 |
| 815 | 1B | 34993 | IWB34993 | IAAV5246                    | 21.7 |
| 816 | 1B | 5323  | IWB5323  | BobWhite_rep_c62985_546     | 21.7 |
| 817 | 1B | 81338 | IWA8199  | wsnp_Ra_rep_c74968_72704437 | 21.7 |
| 818 | 1B | 65786 | IWB65786 | TA004123-0331               | 21.7 |
| 819 | 1B | 11797 | IWB11797 | BS00093231_51               | 21.7 |
| 820 | 1B | 7004  | IWB7004  | BS00022281_51               | 21.7 |
| 821 | 1B | 46114 | IWB46114 | Kukri_c5098_1902            | 21.7 |
| 822 | 1B | 10699 | IWB10699 | BS00073935_51               | 21.7 |
| 823 | 1B | 12288 | IWB12288 | BS00106581_51               | 21.7 |
| 824 | 1B | 41878 | IWB41878 | Kukri_c18052_356            | 21.7 |
| 825 | 1B | 8300  | IWB8300  | BS00042054_51               | 21.7 |
| 826 | 1B | 7193  | IWB7193  | BS00022648_51               | 21.7 |
| 827 | 1B | 42926 | IWB42926 | Kukri_c24120_83             | 21.7 |
| 828 | 1B | 7321  | IWB7321  | BS00022916_51               | 21.7 |
| 829 | 1B | 10153 | IWB10153 | BS00067800_51               | 21.7 |
| 830 | 1B | 35285 | IWB35285 | IAAV7043                    | 21.7 |
| 831 | 1B | 23525 | IWB23525 | Excalibur_c20610_251        | 21.7 |
| 832 | 1B | 34864 | IWB34864 | IAAV4349                    | 21.7 |
| 833 | 1B | 34561 | IWB34561 | IAAV2452                    | 21.7 |
| 834 | 1B | 11930 | IWB11930 | BS00095477_51               | 21.7 |
| 835 | 1B | 10126 | IWB10126 | BS00067706_51               | 21.7 |
| 836 | 1B | 6592  | IWB6592  | BS00013901_51               | 21.7 |
| 837 | 1B | 11458 | IWB11458 | BS00086576_51               | 21.7 |
| 838 | 1B | 11820 | IWB11820 | BS00093740_51               | 21.7 |
| 839 | 1B | 12000 | IWB12000 | BS00097433_51               | 21.7 |
| 840 | 1B | 10448 | IWB10448 | BS00070198_51               | 21.7 |
| 841 | 1B | 25251 | IWB25251 | Excalibur_c32726_279        | 21.7 |
| 842 | 1B | 9456  | IWB9456  | BS00065117_51               | 21.7 |
| 843 | 1B | 11576 | IWB11576 | BS00088672_51               | 21.7 |
| 844 | 1B | 32836 | IWB32836 | GENE-2162_749               | 21.7 |
| 845 | 1B | 7149  | IWB7149  | BS00022549_51               | 21.7 |
| 846 | 1B | 61004 | IWB61004 | RAC875_c90431_275           | 21.7 |
| 847 | 1B | 23524 | IWB23524 | Excalibur_c20610_149        | 21.7 |
| 848 | 1B | 11931 | IWB11931 | BS00095478_51               | 21.7 |
| 849 | 1B | 35204 | IWB35204 | IAAV6464                    | 21.7 |
| 850 | 1B | 29275 | IWB29275 | Excalibur_c89515_95         | 21.7 |
| 851 | 1B | 7703  | IWB7703  | BS00029013_51               | 21.7 |
| 852 | 1B | 7402  | IWB7402  | BS00023058_51               | 21.7 |
| 853 | 1B | 6324  | IWB6324  | BS00010992_51               | 21.7 |
| 854 | 1B | 3038  | IWB3038  | BobWhite_c39153_131         | 21.7 |
| 855 | 1B | 42309 | IWB42309 | Kukri_c20401_674            | 21.7 |
| 856 | 1B | 48577 | IWB48577 | Kukri_rep_c100936_449       | 22.0 |
| 857 | 1B | 9627  | IWB9627  | BS00065737_51               | 22.0 |
| 858 | 1B | 10080 | IWB10080 | BS00067567_51               | 22.0 |
| 859 | 1B | 31874 | IWB31874 | GENE-0427_115               | 22.0 |



|     |    |       |          |                             |      |
|-----|----|-------|----------|-----------------------------|------|
| 860 | 1B | 72466 | IWB72466 | Tdurum_contig55639_241      | 22.0 |
| 861 | 1B | 35774 | IWB35774 | IACX16577                   | 22.0 |
| 862 | 1B | 7589  | IWB7589  | BS00025736_51               | 22.0 |
| 863 | 1B | 81545 | IWA8557  | wsnp_RFL_Contig4080_4587633 | 22.0 |
| 864 | 1B | 29515 | IWB29515 | Excalibur_c95656_129        | 22.6 |
| 865 | 1B | 6522  | IWB6522  | BS00012068_51               | 22.6 |
| 866 | 1B | 9236  | IWB9236  | BS00064263_51               | 22.8 |
| 867 | 1B | 9420  | IWB9420  | BS00064974_51               | 22.8 |
| 868 | 1B | 60993 | IWB60993 | RAC875_c90169_393           | 22.8 |
| 869 | 1B | 58595 | IWB58595 | RAC875_c49924_324           | 22.8 |
| 870 | 1B | 68665 | IWB68665 | Tdurum_contig17609_117      | 22.8 |
| 871 | 1B | 72487 | IWB72487 | Tdurum_contig56148_382      | 22.8 |
| 872 | 1B | 35982 | IWB35982 | IACX502                     | 22.8 |
| 873 | 1B | 63847 | IWB63847 | RFL_Contig2160_617          | 22.8 |
| 874 | 1B | 9942  | IWB9942  | BS00067043_51               | 22.8 |
| 875 | 1B | 9421  | IWB9421  | BS00064975_51               | 22.8 |
| 876 | 1B | 8781  | IWB8781  | BS00059502_51               | 22.8 |
| 877 | 1B | 24506 | IWB24506 | Excalibur_c26936_636        | 22.8 |
| 878 | 1B | 69962 | IWB69962 | Tdurum_contig30113_214      | 22.8 |
| 879 | 1B | 11695 | IWB11695 | BS00091126_51               | 22.8 |
| 880 | 1B | 9645  | IWB9645  | BS00065844_51               | 22.8 |
| 881 | 1B | 45383 | IWB45383 | Kukri_c4376_388             | 23.1 |
| 882 | 1B | 60710 | IWB60710 | RAC875_c8271_1352           | 23.1 |
| 883 | 1B | 73550 | IWB73550 | Tdurum_contig82187_189      | 23.1 |
| 884 | 1B | 72419 | IWB72419 | Tdurum_contig5501_176       | 23.1 |
| 885 | 1B | 51732 | IWB51732 | Ra_c29142_340               | 23.1 |
| 886 | 1B | 69254 | IWB69254 | Tdurum_contig26281_139      | 23.1 |
| 887 | 1B | 56393 | IWB56393 | RAC875_c29906_275           | 23.1 |
| 888 | 1B | 51586 | IWB51586 | Ra_c24839_215               | 23.1 |
| 889 | 1B | 35375 | IWB35375 | IAAV7704                    | 23.1 |
| 890 | 1B | 35128 | IWB35128 | IAAV6                       | 23.1 |
| 891 | 1B | 28269 | IWB28269 | Excalibur_c6417_938         | 23.1 |
| 892 | 1B | 80045 | IWA6450  | wsnp_Ku_c11987_19473636     | 23.1 |
| 893 | 1B | 24659 | IWB24659 | Excalibur_c28016_132        | 23.1 |
| 894 | 1B | 23213 | IWB23213 | Excalibur_c1886_1288        | 23.1 |
| 895 | 1B | 12252 | IWB12252 | BS00105606_51               | 23.1 |
| 896 | 1B | 63556 | IWB63556 | RFL_Contig1081_570          | 23.1 |
| 897 | 1B | 51241 | IWB51241 | Ra_c16879_977               | 23.1 |
| 898 | 1B | 60711 | IWB60711 | RAC875_c8271_1469           | 23.1 |
| 899 | 1B | 41867 | IWB41867 | Kukri_c18006_1568           | 23.1 |
| 900 | 1B | 60713 | IWB60713 | RAC875_c8271_887            | 23.1 |
| 901 | 1B | 35406 | IWB35406 | IAAV7915                    | 23.1 |
| 902 | 1B | 69668 | IWB69668 | Tdurum_contig28940_690      | 23.1 |
| 903 | 1B | 63352 | IWB63352 | RAC875_rep_c96733_369       | 23.1 |
| 904 | 1B | 73942 | IWB73942 | Tdurum_contig95654_237      | 23.4 |
| 905 | 1B | 73332 | IWB73332 | Tdurum_contig75938_1546     | 23.7 |
| 906 | 1B | 12562 | IWB12562 | BS00110546_51               | 23.9 |
| 907 | 1B | 28216 | IWB28216 | Excalibur_c63563_370        | 24.2 |
| 908 | 1B | 60559 | IWB60559 | RAC875_c79370_378           | 25.3 |
| 909 | 1B | 8598  | IWB8598  | BS00051105_51               | 25.9 |
| 910 | 1B | 5791  | IWB5791  | BS00001364_51               | 26.2 |
| 911 | 1B | 47684 | IWB47684 | Kukri_c7647_1122            | 26.5 |
| 912 | 1B | 65404 | IWB65404 | TA001473-0980               | 26.5 |
| 913 | 1B | 34533 | IWB34533 | IAAV2324                    | 26.5 |

|     |    |       |          |                        |      |
|-----|----|-------|----------|------------------------|------|
| 914 | 1B | 6848  | IWB6848  | BS00021995_51          | 26.5 |
| 915 | 1B | 36013 | IWB36013 | IACX5756               | 26.5 |
| 916 | 1B | 8726  | IWB8726  | BS00057730_51          | 26.5 |
| 917 | 1B | 9083  | IWB9083  | BS00063573_51          | 26.5 |
| 918 | 1B | 9084  | IWB9084  | BS00063574_51          | 26.5 |
| 919 | 1B | 10333 | IWB10333 | BS00068512_51          | 26.5 |
| 920 | 1B | 13048 | IWB13048 | CAP11_c7652_277        | 26.5 |
| 921 | 1B | 21809 | IWB21809 | Excalibur_c111213_145  | 26.5 |
| 922 | 1B | 32835 | IWB32835 | GENE-2162_720          | 26.5 |
| 923 | 1B | 34959 | IWB34959 | IAAV4985               | 26.5 |
| 924 | 1B | 39791 | IWB39791 | Ku_c66951_958          | 26.5 |
| 925 | 1B | 25250 | IWB25250 | Excalibur_c32726_125   | 26.5 |
| 926 | 1B | 34046 | IWB34046 | GENE-4608_569          | 26.5 |
| 927 | 1B | 36003 | IWB36003 | IACX5712               | 26.5 |
| 928 | 1B | 55211 | IWB55211 | RAC875_c21598_248      | 26.5 |
| 929 | 1B | 6304  | IWB6304  | BS00010875_51          | 26.5 |
| 930 | 1B | 6972  | IWB6972  | BS00022218_51          | 26.5 |
| 931 | 1B | 8875  | IWB8875  | BS00062632_51          | 26.5 |
| 932 | 1B | 9735  | IWB9735  | BS00066165_51          | 26.5 |
| 933 | 1B | 10269 | IWB10269 | BS00068246_51          | 26.5 |
| 934 | 1B | 39667 | IWB39667 | Ku_c58871_938          | 26.5 |
| 935 | 1B | 47893 | IWB47893 | Kukri_c81766_107       | 26.5 |
| 936 | 1B | 52544 | IWB52544 | Ra_c71421_387          | 26.5 |
| 937 | 1B | 68891 | IWB68891 | Tdurum_contig20702_326 | 26.5 |
| 938 | 1B | 70181 | IWB70181 | Tdurum_contig31149_408 | 26.5 |
| 939 | 1B | 9464  | IWB9464  | BS00065139_51          | 26.7 |
| 940 | 1B | 14738 | IWB14738 | CAP8_c4506_82          | 26.7 |
| 941 | 1B | 20056 | IWB20056 | Ex_c19477_336          | 26.7 |
| 942 | 1B | 8329  | IWB8329  | BS00043071_51          | 26.7 |
| 943 | 1B | 36294 | IWB36294 | IACX8373               | 27.0 |
| 944 | 1B | 6137  | IWB6137  | BS00009921_51          | 27.0 |
| 945 | 1B | 36303 | IWB36303 | IACX8452               | 27.3 |
| 946 | 1B | 43472 | IWB43472 | Kukri_c27690_411       | 27.3 |
| 947 | 1B | 58569 | IWB58569 | RAC875_c49601_837      | 27.3 |
| 948 | 1B | 8473  | IWB8473  | BS00047700_51          | 27.3 |
| 949 | 1B | 42173 | IWB42173 | Kukri_c19641_477       | 27.3 |
| 950 | 1B | 40730 | IWB40730 | Kukri_c12063_1652      | 27.3 |
| 951 | 1B | 41254 | IWB41254 | Kukri_c147_1620        | 27.3 |
| 952 | 1B | 7228  | IWB7228  | BS00022722_51          | 27.3 |
| 953 | 1B | 7485  | IWB7485  | BS00023302_51          | 27.3 |
| 954 | 1B | 9700  | IWB9700  | BS00066040_51          | 27.3 |
| 955 | 1B | 10134 | IWB10134 | BS00067743_51          | 27.3 |
| 956 | 1B | 34783 | IWB34783 | IAAV3828               | 27.3 |
| 957 | 1B | 11553 | IWB11553 | BS00088264_51          | 27.3 |
| 958 | 1B | 28335 | IWB28335 | Excalibur_c6497_535    | 27.3 |
| 959 | 1B | 48992 | IWB48992 | Kukri_rep_c104432_114  | 27.3 |
| 960 | 1B | 8585  | IWB8585  | BS00050126_51          | 27.3 |
| 961 | 1B | 10923 | IWB10923 | BS00077353_51          | 27.3 |
| 962 | 1B | 75203 | IWB75203 | tplb0059c20_2221       | 27.3 |
| 963 | 1B | 11720 | IWB11720 | BS00091640_51          | 27.3 |
| 964 | 1B | 8041  | IWB8041  | BS00036121_51          | 27.3 |
| 965 | 1B | 3839  | IWB3839  | BobWhite_c5441_151     | 27.3 |
| 966 | 1B | 8588  | IWB8588  | BS00050457_51          | 27.3 |
| 967 | 1B | 9147  | IWB9147  | BS00063866_51          | 27.3 |

|      |    |       |          |                             |      |
|------|----|-------|----------|-----------------------------|------|
| 968  | 1B | 12472 | IWB12472 | BS00110104_51               | 27.3 |
| 969  | 1B | 31006 | IWB31006 | Excalibur_rep_c68921_433    | 27.3 |
| 970  | 1B | 41306 | IWB41306 | Kukri_c14968_674            | 27.3 |
| 971  | 1B | 47264 | IWB47264 | Kukri_c65759_98             | 27.3 |
| 972  | 1B | 58936 | IWB58936 | RAC875_c53382_120           | 27.3 |
| 973  | 1B | 63258 | IWB63258 | RAC875_rep_c87552_86        | 27.3 |
| 974  | 1B | 18084 | IWB18084 | D_GB5Y7FA02GPYE5_185        | 27.3 |
| 975  | 1B | 27619 | IWB27619 | Excalibur_c56029_277        | 27.3 |
| 976  | 1B | 10660 | IWB10660 | BS00073373_51               | 27.3 |
| 977  | 1B | 7369  | IWB7369  | BS00023006_51               | 27.3 |
| 978  | 1B | 7021  | IWB7021  | BS00022317_51               | 27.3 |
| 979  | 1B | 3176  | IWB3176  | BobWhite_c4147_1429         | 27.3 |
| 980  | 1B | 25023 | IWB25023 | Excalibur_c30762_713        | 27.3 |
| 981  | 1B | 10780 | IWB10780 | BS00075036_51               | 27.8 |
| 982  | 1B | 9998  | IWB9998  | BS00067247_51               | 27.8 |
| 983  | 1B | 28303 | IWB28303 | Excalibur_c64533_980        | 27.8 |
| 984  | 1B | 56464 | IWB56464 | RAC875_c30381_573           | 27.8 |
| 985  | 1B | 52679 | IWB52679 | Ra_c7855_49                 | 27.8 |
| 986  | 1B | 81454 | IWA8392  | wsnp_RFL_Contig2794_2564017 | 27.8 |
| 987  | 1B | 52497 | IWB52497 | Ra_c70039_1705              | 27.8 |
| 988  | 1B | 35316 | IWB35316 | IAAV7260                    | 27.8 |
| 989  | 1B | 8141  | IWB8141  | BS00038778_51               | 27.8 |
| 990  | 1B | 75740 | IWA580   | wsnp_BG607036B_Ta_1_1       | 27.8 |
| 991  | 1B | 76620 | IWA1885  | wsnp_Ex_c1429_2745237       | 27.8 |
| 992  | 1B | 21152 | IWB21152 | Ex_c68416_859               | 27.8 |
| 993  | 1B | 58041 | IWB58041 | RAC875_c44452_438           | 27.8 |
| 994  | 1B | 51198 | IWB51198 | Ra_c16069_1820              | 27.8 |
| 995  | 1B | 76619 | IWA1884  | wsnp_Ex_c1429_2744367       | 27.8 |
| 996  | 1B | 38751 | IWB38751 | Ku_c20833_518               | 27.8 |
| 997  | 1B | 8100  | IWB8100  | BS00037306_51               | 27.8 |
| 998  | 1B | 67237 | IWB67237 | Tdurum_contig11692_131      | 27.8 |
| 999  | 1B | 51977 | IWB51977 | Ra_c3837_797                | 27.8 |
| 1000 | 1B | 39338 | IWB39338 | Ku_c3893_771                | 27.8 |
| 1001 | 1B | 57232 | IWB57232 | RAC875_c37031_312           | 27.8 |
| 1002 | 1B | 52671 | IWB52671 | Ra_c7745_1438               | 27.8 |
| 1003 | 1B | 48018 | IWB48018 | Kukri_c84940_106            | 27.8 |
| 1004 | 1B | 6405  | IWB6405  | BS00011450_51               | 28.1 |
| 1005 | 1B | 31942 | IWB31942 | GENE-0522_336               | 28.1 |
| 1006 | 1B | 1270  | IWB1270  | BobWhite_c19327_314         | 28.1 |
| 1007 | 1B | 40931 | IWB40931 | Kukri_c12936_1505           | 28.1 |
| 1008 | 1B | 507   | IWB507   | BobWhite_c13450_2100        | 28.1 |
| 1009 | 1B | 3233  | IWB3233  | BobWhite_c4236_410          | 28.1 |
| 1010 | 1B | 78993 | IWA4975  | wsnp_Ex_c9902_16309166      | 28.1 |
| 1011 | 1B | 13782 | IWB13782 | CAP7_c1241_128              | 28.1 |
| 1012 | 1B | 81581 | IWA8619  | wsnp_RFL_Contig4726_5654774 | 28.1 |
| 1013 | 1B | 74353 | IWB74353 | tplb0029b01_123             | 28.1 |
| 1014 | 1B | 6906  | IWB6906  | BS00022104_51               | 28.1 |
| 1015 | 1B | 81008 | IWA7737  | wsnp_Ra_c21132_30487331     | 28.1 |
| 1016 | 1B | 60321 | IWB60321 | RAC875_c7236_3265           | 28.1 |
| 1017 | 1B | 74352 | IWB74352 | tplb0029b01_1022            | 28.1 |
| 1018 | 1B | 31560 | IWB31560 | Excalibur_s113941_196       | 28.1 |
| 1019 | 1B | 77933 | IWA3620  | wsnp_Ex_c37635_45347415     | 28.1 |
| 1020 | 1B | 9149  | IWB9149  | BS00063885_51               | 28.1 |
| 1021 | 1B | 31756 | IWB31756 | GENE-0227_217               | 28.1 |

|      |    |       |          |                           |      |
|------|----|-------|----------|---------------------------|------|
| 1022 | 1B | 47788 | IWB47788 | Kukri_c7902_438           | 28.1 |
| 1023 | 1B | 25220 | IWB25220 | Excalibur_c32608_500      | 28.1 |
| 1024 | 1B | 30892 | IWB30892 | Excalibur_rep_c67757_264  | 28.1 |
| 1025 | 1B | 30161 | IWB30161 | Excalibur_rep_c106001_513 | 28.1 |
| 1026 | 1B | 669   | IWB669   | BobWhite_c1456_615        | 28.1 |
| 1027 | 1B | 43992 | IWB43992 | Kukri_c31554_437          | 28.1 |
| 1028 | 1B | 78532 | IWA4389  | wsnp_Ex_c5947_10431109    | 28.1 |
| 1029 | 1B | 23218 | IWB23218 | Excalibur_c18876_334      | 28.1 |
| 1030 | 1B | 6209  | IWB6209  | BS00010352_51             | 28.1 |
| 1031 | 1B | 34608 | IWB34608 | IAAV2764                  | 28.1 |
| 1032 | 1B | 9281  | IWB9281  | BS00064438_51             | 28.4 |
| 1033 | 1B | 45947 | IWB45947 | Kukri_c49091_415          | 28.4 |
| 1034 | 1B | 73157 | IWB73157 | Tdurum_contig69821_141    | 28.4 |
| 1035 | 1B | 73504 | IWB73504 | Tdurum_contig81435_288    | 28.4 |
| 1036 | 1B | 80147 | IWA6581  | wsnp_Ku_c16117_24917524   | 28.4 |
| 1037 | 1B | 80372 | IWA6890  | wsnp_Ku_c30982_40765254   | 28.4 |
| 1038 | 1B | 12179 | IWB12179 | BS00101500_51             | 28.4 |
| 1039 | 1B | 461   | IWB461   | BobWhite_c1318_691        | 28.4 |
| 1040 | 1B | 4355  | IWB4355  | BobWhite_c7577_69         | 28.4 |
| 1041 | 1B | 14360 | IWB14360 | CAP7_rep_c10850_139       | 28.4 |
| 1042 | 1B | 20542 | IWB20542 | Ex_c34713_501             | 28.4 |
| 1043 | 1B | 31732 | IWB31732 | GENE-0193_197             | 28.4 |
| 1044 | 1B | 34448 | IWB34448 | IAAV178                   | 28.4 |
| 1045 | 1B | 51549 | IWB51549 | Ra_c23839_884             | 28.4 |
| 1046 | 1B | 72329 | IWB72329 | Tdurum_contig53888_107    | 28.4 |
| 1047 | 1B | 75426 | IWA139   | wsnp_be443797B_Ta_2_1     | 28.4 |
| 1048 | 1B | 6034  | IWB6034  | BS00009270_51             | 28.4 |
| 1049 | 1B | 7211  | IWB7211  | BS00022687_51             | 28.4 |
| 1050 | 1B | 11507 | IWB11507 | BS00087451_51             | 28.4 |
| 1051 | 1B | 22947 | IWB22947 | Excalibur_c1729_841       | 28.4 |
| 1052 | 1B | 35618 | IWB35618 | IACX1008                  | 28.4 |
| 1053 | 1B | 36198 | IWB36198 | IACX7450                  | 28.4 |
| 1054 | 1B | 72174 | IWB72174 | Tdurum_contig51348_326    | 28.4 |
| 1055 | 1B | 820   | IWB820   | BobWhite_c15603_69        | 28.4 |
| 1056 | 1B | 7716  | IWB7716  | BS00029345_51             | 28.4 |
| 1057 | 1B | 8913  | IWB8913  | BS00062740_51             | 28.4 |
| 1058 | 1B | 35383 | IWB35383 | IAAV7757                  | 28.4 |
| 1059 | 1B | 41024 | IWB41024 | Kukri_c13349_176          | 28.4 |
| 1060 | 1B | 41126 | IWB41126 | Kukri_c13976_96           | 28.4 |
| 1061 | 1B | 49892 | IWB49892 | Kukri_rep_c69383_83       | 28.4 |
| 1062 | 1B | 50113 | IWB50113 | Kukri_rep_c71291_155      | 28.4 |
| 1063 | 1B | 57824 | IWB57824 | RAC875_c42206_305         | 28.4 |
| 1064 | 1B | 62725 | IWB62725 | RAC875_rep_c70803_1442    | 28.4 |
| 1065 | 1B | 67337 | IWB67337 | Tdurum_contig11877_429    | 28.4 |
| 1066 | 1B | 77679 | IWA3295  | wsnp_Ex_c30805_39678077   | 28.4 |
| 1067 | 1B | 77940 | IWA3631  | wsnp_Ex_c38116_45719983   | 28.4 |
| 1068 | 1B | 80435 | IWA6965  | wsnp_Ku_c3710_6836438     | 28.4 |
| 1069 | 1B | 6103  | IWB6103  | BS00009731_51             | 28.4 |
| 1070 | 1B | 73662 | IWB73662 | Tdurum_contig84184_124    | 28.4 |
| 1071 | 1B | 76768 | IWA2073  | wsnp_Ex_c15934_24341135   | 28.4 |
| 1072 | 1B | 7114  | IWB7114  | BS00022490_51             | 28.4 |
| 1073 | 1B | 13381 | IWB13381 | CAP12_c3646_110           | 28.4 |
| 1074 | 1B | 55320 | IWB55320 | RAC875_c22244_61          | 28.4 |
| 1075 | 1B | 40376 | IWB40376 | Kukri_c10593_1064         | 28.4 |

|      |    |       |          |                             |      |
|------|----|-------|----------|-----------------------------|------|
| 1076 | 1B | 79264 | IWA5304  | wsnp_Ex_rep_c66802_65172754 | 28.4 |
| 1077 | 1B | 40109 | IWB40109 | Ku_c8767_1245               | 28.4 |
| 1078 | 1B | 49345 | IWB49345 | Kukri_rep_c108436_534       | 28.4 |
| 1079 | 1B | 51448 | IWB51448 | Ra_c21902_654               | 28.4 |
| 1080 | 1B | 72789 | IWB72789 | Tdurum_contig61425_242      | 28.4 |
| 1081 | 1B | 78544 | IWA4402  | wsnp_Ex_c6022_10552811      | 28.4 |
| 1082 | 1B | 44741 | IWB44741 | Kukri_c37856_492            | 28.4 |
| 1083 | 1B | 7205  | IWB7205  | BS00022670_51               | 28.4 |
| 1084 | 1B | 81422 | IWA8337  | wsnp_RFL_Contig2446_2008649 | 28.4 |
| 1085 | 1B | 5843  | IWB5843  | BS00003600_51               | 28.4 |
| 1086 | 1B | 6787  | IWB6787  | BS00021900_51               | 28.4 |
| 1087 | 1B | 58051 | IWB58051 | RAC875_c44575_561           | 28.4 |
| 1088 | 1B | 80717 | IWA7343  | wsnp_Ku_c9014_15193623      | 28.4 |
| 1089 | 1B | 47949 | IWB47949 | Kukri_c8308_245             | 28.4 |
| 1090 | 1B | 77489 | IWA3048  | wsnp_Ex_c26419_35667216     | 28.4 |
| 1091 | 1B | 79445 | IWA5546  | wsnp_Ex_rep_c68573_67416138 | 28.4 |
| 1092 | 1B | 6386  | IWB6386  | BS00011333_51               | 28.4 |
| 1093 | 1B | 44740 | IWB44740 | Kukri_c37856_123            | 28.4 |
| 1094 | 1B | 47697 | IWB47697 | Kukri_c76762_166            | 28.4 |
| 1095 | 1B | 66113 | IWB66113 | TA013374-0567               | 28.4 |
| 1096 | 1B | 71800 | IWB71800 | Tdurum_contig47456_182      | 28.4 |
| 1097 | 1B | 72330 | IWB72330 | Tdurum_contig53888_350      | 28.4 |
| 1098 | 1B | 24786 | IWB24786 | Excalibur_c29029_424        | 28.4 |
| 1099 | 1B | 50050 | IWB50050 | Kukri_rep_c70738_896        | 28.4 |
| 1100 | 1B | 39421 | IWB39421 | Ku_c42700_2798              | 28.4 |
| 1101 | 1B | 49891 | IWB49891 | Kukri_rep_c69383_56         | 28.4 |
| 1102 | 1B | 67338 | IWB67338 | Tdurum_contig11877_785      | 28.4 |
| 1103 | 1B | 70974 | IWB70974 | Tdurum_contig42182_6396     | 28.4 |
| 1104 | 1B | 8611  | IWB8611  | BS00052075_51               | 28.4 |
| 1105 | 1B | 26008 | IWB26008 | Excalibur_c39191_82         | 28.4 |
| 1106 | 1B | 9008  | IWB9008  | BS00063113_51               | 28.4 |
| 1107 | 1B | 39629 | IWB39629 | Ku_c56327_481               | 28.4 |
| 1108 | 1B | 50916 | IWB50916 | Ra_c11303_359               | 28.4 |
| 1109 | 1B | 8257  | IWB8257  | BS00041010_51               | 28.4 |
| 1110 | 1B | 34334 | IWB34334 | IAAV1158                    | 28.4 |
| 1111 | 1B | 6409  | IWB6409  | BS00011465_51               | 28.4 |
| 1112 | 1B | 26258 | IWB26258 | Excalibur_c4163_387         | 29.2 |
| 1113 | 1B | 35461 | IWB35461 | IAAV8347                    | 29.2 |
| 1114 | 1B | 60240 | IWB60240 | RAC875_c6905_776            | 29.2 |
| 1115 | 1B | 10444 | IWB10444 | BS00070139_51               | 29.2 |
| 1116 | 1B | 27852 | IWB27852 | Excalibur_c59016_839        | 29.2 |
| 1117 | 1B | 42397 | IWB42397 | Kukri_c20927_339            | 29.2 |
| 1118 | 1B | 72597 | IWB72597 | Tdurum_contig57731_162      | 29.2 |
| 1119 | 1B | 75400 | IWA106   | wsnp_BE442716B-Ta_2_1       | 29.2 |
| 1120 | 1B | 10555 | IWB10555 | BS00071555_51               | 29.2 |
| 1121 | 1B | 10897 | IWB10897 | BS00076696_51               | 29.2 |
| 1122 | 1B | 12484 | IWB12484 | BS00110148_51               | 29.2 |
| 1123 | 1B | 40763 | IWB40763 | Kukri_c12151_769            | 29.2 |
| 1124 | 1B | 47637 | IWB47637 | Kukri_c75399_226            | 29.2 |
| 1125 | 1B | 70319 | IWB70319 | Tdurum_contig32033_334      | 29.2 |
| 1126 | 1B | 71459 | IWB71459 | Tdurum_contig43910_687      | 29.2 |
| 1127 | 1B | 65324 | IWB65324 | RFL_Contig981_1985          | 29.2 |
| 1128 | 1B | 69081 | IWB69081 | Tdurum_contig25434_209      | 29.2 |
| 1129 | 1B | 71457 | IWB71457 | Tdurum_contig43910_1113     | 29.2 |

|      |    |       |          |                         |      |
|------|----|-------|----------|-------------------------|------|
| 1130 | 1B | 75173 | IWB75173 | tplb0058h11_348         | 29.2 |
| 1131 | 1B | 221   | IWB221   | BobWhite_c11460_291     | 29.2 |
| 1132 | 1B | 12485 | IWB12485 | BS00110149_51           | 29.2 |
| 1133 | 1B | 192   | IWB192   | BobWhite_c11235_370     | 29.2 |
| 1134 | 1B | 8804  | IWB8804  | BS00060270_51           | 29.2 |
| 1135 | 1B | 35253 | IWB35253 | IAAV6825                | 29.2 |
| 1136 | 1B | 56778 | IWB56778 | RAC875_c32894_1038      | 29.2 |
| 1137 | 1B | 59327 | IWB59327 | RAC875_c5796_424        | 29.2 |
| 1138 | 1B | 62805 | IWB62805 | RAC875_rep_c71685_445   | 29.2 |
| 1139 | 1B | 35871 | IWB35871 | IACX2701                | 29.2 |
| 1140 | 1B | 71008 | IWB71008 | Tdurum_contig42217_127  | 29.2 |
| 1141 | 1B | 6815  | IWB6815  | BS00021947_51           | 29.2 |
| 1142 | 1B | 10823 | IWB10823 | BS00075663_51           | 29.2 |
| 1143 | 1B | 69736 | IWB69736 | Tdurum_contig29228_114  | 29.2 |
| 1144 | 1B | 69863 | IWB69863 | Tdurum_contig29676_141  | 29.2 |
| 1145 | 1B | 72598 | IWB72598 | Tdurum_contig57731_225  | 29.2 |
| 1146 | 1B | 75361 | IWA44    | wsnp_BE403956B_Ta_2_3   | 29.2 |
| 1147 | 1B | 40762 | IWB40762 | Kukri_c12151_467        | 29.2 |
| 1148 | 1B | 70318 | IWB70318 | Tdurum_contig32033_125  | 29.2 |
| 1149 | 1B | 73480 | IWB73480 | Tdurum_contig8081_2331  | 29.2 |
| 1150 | 1B | 73732 | IWB73732 | Tdurum_contig87816_268  | 29.2 |
| 1151 | 1B | 11880 | IWB11880 | BS00094498_51           | 29.2 |
| 1152 | 1B | 7163  | IWB7163  | BS00022581_51           | 29.2 |
| 1153 | 1B | 10524 | IWB10524 | BS00071083_51           | 29.2 |
| 1154 | 1B | 27773 | IWB27773 | Excalibur_c57972_116    | 29.2 |
| 1155 | 1B | 37720 | IWB37720 | JD_c64600_281           | 29.2 |
| 1156 | 1B | 11881 | IWB11881 | BS00094499_51           | 29.2 |
| 1157 | 1B | 31759 | IWB31759 | GENE-0235_131           | 29.2 |
| 1158 | 1B | 31782 | IWB31782 | GENE-0283_96            | 29.2 |
| 1159 | 1B | 38394 | IWB38394 | Ku_c13515_171           | 29.2 |
| 1160 | 1B | 36032 | IWB36032 | IACX5814                | 29.2 |
| 1161 | 1B | 6458  | IWB6458  | BS00011712_51           | 29.2 |
| 1162 | 1B | 10049 | IWB10049 | BS00067434_51           | 29.2 |
| 1163 | 1B | 56779 | IWB56779 | RAC875_c32894_1116      | 29.2 |
| 1164 | 1B | 75401 | IWA107   | wsnp_BE442716B_Ta_2_2   | 29.2 |
| 1165 | 1B | 12002 | IWB12002 | BS00097477_51           | 29.2 |
| 1166 | 1B | 33215 | IWB33215 | GENE-3085_533           | 29.2 |
| 1167 | 1B | 69662 | IWB69662 | Tdurum_contig28899_127  | 29.2 |
| 1168 | 1B | 6814  | IWB6814  | BS00021946_51           | 29.2 |
| 1169 | 1B | 26257 | IWB26257 | Excalibur_c4163_176     | 29.2 |
| 1170 | 1B | 7939  | IWB7939  | BS00033681_51           | 29.8 |
| 1171 | 1B | 10997 | IWB10997 | BS00078228_51           | 29.8 |
| 1172 | 1B | 69550 | IWB69550 | Tdurum_contig28530_380  | 29.8 |
| 1173 | 1B | 6921  | IWB6921  | BS00022133_51           | 30.3 |
| 1174 | 1B | 72646 | IWB72646 | Tdurum_contig59449_249  | 32.6 |
| 1175 | 1B | 44100 | IWB44100 | Kukri_c32430_109        | 32.6 |
| 1176 | 1B | 60912 | IWB60912 | RAC875_c87890_234       | 32.6 |
| 1177 | 1B | 65666 | IWB65666 | TA003238-0490           | 32.6 |
| 1178 | 1B | 70166 | IWB70166 | Tdurum_contig31094_386  | 32.6 |
| 1179 | 1B | 80473 | IWA7017  | wsnp_Ku_c39862_48205590 | 32.6 |
| 1180 | 1B | 17725 | IWB17725 | D_GA8KES401BNLTU_253    | 32.9 |
| 1181 | 1B | 7365  | IWB7365  | BS00023001_51           | 32.9 |
| 1182 | 1B | 67838 | IWB67838 | Tdurum_contig13044_268  | 32.9 |
| 1183 | 1B | 69772 | IWB69772 | Tdurum_contig29363_511  | 32.9 |

|      |    |       |          |                             |      |
|------|----|-------|----------|-----------------------------|------|
| 1184 | 1B | 35922 | IWB35922 | IACX3408                    | 32.9 |
| 1185 | 1B | 8272  | IWB8272  | BS00041355_51               | 32.9 |
| 1186 | 1B | 71511 | IWB71511 | Tdurum_contig44232_132      | 32.9 |
| 1187 | 1B | 69973 | IWB69973 | Tdurum_contig30195_318      | 32.9 |
| 1188 | 1B | 65754 | IWB65754 | TA003900-0407               | 35.2 |
| 1189 | 1B | 12819 | IWB12819 | CAP11_c2974_53              | 35.2 |
| 1190 | 1B | 8182  | IWB8182  | BS00039583_51               | 35.2 |
| 1191 | 1B | 7180  | IWB7180  | BS00022615_51               | 35.2 |
| 1192 | 1B | 76778 | IWA2084  | wsnp_Ex_c1600_3051075       | 35.2 |
| 1193 | 1B | 7684  | IWB7684  | BS00028318_51               | 35.2 |
| 1194 | 1B | 80881 | IWA7560  | wsnp_Ra_c11232_18256748     | 35.2 |
| 1195 | 1B | 78392 | IWA4203  | wsnp_Ex_c53976_57027635     | 35.2 |
| 1196 | 1B | 29900 | IWB29900 | Excalibur_rep_c103109_88    | 35.2 |
| 1197 | 1B | 68865 | IWB68865 | Tdurum_contig20299_368      | 35.2 |
| 1198 | 1B | 81187 | IWA7982  | wsnp_Ra_c5088_9081927       | 35.2 |
| 1199 | 1B | 6916  | IWB6916  | BS00022124_51               | 35.2 |
| 1200 | 1B | 6521  | IWB6521  | BS00012056_51               | 35.2 |
| 1201 | 1B | 35635 | IWB35635 | IACX10809                   | 35.2 |
| 1202 | 1B | 68866 | IWB68866 | Tdurum_contig20299_508      | 35.2 |
| 1203 | 1B | 68867 | IWB68867 | Tdurum_contig20299_601      | 35.2 |
| 1204 | 1B | 68864 | IWB68864 | Tdurum_contig20299_142      | 35.2 |
| 1205 | 1B | 72962 | IWB72962 | Tdurum_contig63834_340      | 35.2 |
| 1206 | 1B | 72078 | IWB72078 | Tdurum_contig50473_889      | 35.2 |
| 1207 | 1B | 81042 | IWA7787  | wsnp_Ra_c25590_35156699     | 35.4 |
| 1208 | 1B | 70168 | IWB70168 | Tdurum_contig31102_299      | 35.4 |
| 1209 | 1B | 35683 | IWB35683 | IACX11291                   | 35.4 |
| 1210 | 1B | 5737  | IWB5737  | BS00000066_51               | 35.4 |
| 1211 | 1B | 60940 | IWB60940 | RAC875_c8888_802            | 35.4 |
| 1212 | 1B | 36034 | IWB36034 | IACX5821                    | 35.4 |
| 1213 | 1B | 76679 | IWA1959  | wsnp_Ex_c1495_2864718       | 35.4 |
| 1214 | 1B | 859   | IWB859   | BobWhite_c16005_289         | 35.4 |
| 1215 | 1B | 75733 | IWA573   | wsnp_BG606586B_Ta_2_13      | 35.4 |
| 1216 | 1B | 79618 | IWA5779  | wsnp_JD_c11014_11565501     | 35.4 |
| 1217 | 1B | 12292 | IWB12292 | BS00106626_51               | 35.4 |
| 1218 | 1B | 7235  | IWB7235  | BS00022742_51               | 35.4 |
| 1219 | 1B | 36348 | IWB36348 | IACX9097                    | 35.4 |
| 1220 | 1B | 36395 | IWB36395 | IACX9622                    | 35.4 |
| 1221 | 1B | 6174  | IWB6174  | BS00010130_51               | 35.4 |
| 1222 | 1B | 46559 | IWB46559 | Kukri_c559_193              | 35.4 |
| 1223 | 1B | 6504  | IWB6504  | BS00011973_51               | 36.0 |
| 1224 | 1B | 52956 | IWB52956 | RAC875_c102223_220          | 36.0 |
| 1225 | 1B | 47566 | IWB47566 | Kukri_c73734_175            | 36.3 |
| 1226 | 1B | 9693  | IWB9693  | BS00066007_51               | 36.3 |
| 1227 | 1B | 14729 | IWB14729 | CAP8_c4452_431              | 36.5 |
| 1228 | 1B | 76106 | IWA1231  | wsnp_CAP8_rep_c4452_2170021 | 36.5 |
| 1229 | 1B | 75880 | IWA775   | wsnp_CAP11_c543_375403      | 36.5 |
| 1230 | 1B | 11968 | IWB11968 | BS00096719_51               | 38.5 |
| 1231 | 1B | 71350 | IWB71350 | Tdurum_contig42755_886      | 38.8 |
| 1232 | 1B | 76625 | IWA1890  | wsnp_Ex_c1440_2764867       | 38.8 |
| 1233 | 1B | 73964 | IWB73964 | Tdurum_contig969_209        | 38.8 |
| 1234 | 1B | 49534 | IWB49534 | Kukri_rep_c111991_498       | 38.8 |
| 1235 | 1B | 76624 | IWA1889  | wsnp_Ex_c1440_2764269       | 38.8 |
| 1236 | 1B | 61131 | IWB61131 | RAC875_c95548_156           | 38.8 |
| 1237 | 1B | 11261 | IWB11261 | BS00082521_51               | 39.1 |

|      |    |       |          |                          |      |
|------|----|-------|----------|--------------------------|------|
| 1238 | 1B | 28518 | IWB28518 | Excalibur_c6892_274      | 39.1 |
| 1239 | 1B | 30252 | IWB30252 | Excalibur_rep_c107218_71 | 39.1 |
| 1240 | 1B | 73016 | IWB73016 | Tdurum_contig65046_52    | 39.1 |
| 1241 | 1B | 43583 | IWB43583 | Kukri_c28631_607         | 39.1 |
| 1242 | 1B | 12327 | IWB12327 | BS00107749_51            | 39.1 |
| 1243 | 1B | 31807 | IWB31807 | GENE-0331_314            | 39.1 |
| 1244 | 1B | 11372 | IWB11372 | BS00084570_51            | 39.1 |
| 1245 | 1B | 5184  | IWB5184  | BobWhite_rep_c57575_65   | 39.1 |
| 1246 | 1B | 71596 | IWB71596 | Tdurum_contig45301_876   | 39.4 |
| 1247 | 1B | 45575 | IWB45575 | Kukri_c45852_78          | 39.4 |
| 1248 | 1B | 9175  | IWB9175  | BS00064032_51            | 39.4 |
| 1249 | 1B | 22507 | IWB22507 | Excalibur_c14911_466     | 40.7 |
| 1250 | 1B | 73514 | IWB73514 | Tdurum_contig8158_269    | 40.7 |
| 1251 | 1B | 72551 | IWB72551 | Tdurum_contig57101_1616  | 40.7 |
| 1252 | 1B | 72549 | IWB72549 | Tdurum_contig57101_1235  | 40.7 |
| 1253 | 1B | 72552 | IWB72552 | Tdurum_contig57101_2158  | 40.7 |
| 1254 | 1B | 72550 | IWB72550 | Tdurum_contig57101_1349  | 40.7 |
| 1255 | 1B | 59152 | IWB59152 | RAC875_c55891_659        | 40.7 |
| 1256 | 1B | 8187  | IWB8187  | BS00039740_51            | 41.0 |
| 1257 | 1B | 70037 | IWB70037 | Tdurum_contig30517_174   | 42.1 |
| 1258 | 1B | 29348 | IWB29348 | Excalibur_c9149_1789     | 42.1 |
| 1259 | 1B | 29347 | IWB29347 | Excalibur_c9149_1326     | 42.1 |
| 1260 | 1B | 21824 | IWB21824 | Excalibur_c112015_118    | 42.1 |
| 1261 | 1B | 70039 | IWB70039 | Tdurum_contig30517_578   | 42.1 |
| 1262 | 1B | 70038 | IWB70038 | Tdurum_contig30517_310   | 42.1 |
| 1263 | 1B | 63960 | IWB63960 | RFL_Contig2484_1065      | 42.4 |
| 1264 | 1B | 34848 | IWB34848 | IAAV420                  | 42.4 |
| 1265 | 1B | 67865 | IWB67865 | Tdurum_contig13117_1316  | 42.4 |
| 1266 | 1B | 7846  | IWB7846  | BS00031596_51            | 42.4 |
| 1267 | 1B | 67259 | IWB67259 | Tdurum_contig11720_924   | 42.4 |
| 1268 | 1B | 61640 | IWB61640 | RAC875_rep_c106876_558   | 42.4 |
| 1269 | 1B | 61639 | IWB61639 | RAC875_rep_c106876_446   | 42.4 |
| 1270 | 1B | 24642 | IWB24642 | Excalibur_c27915_560     | 42.9 |
| 1271 | 1B | 9918  | IWB9918  | BS00066944_51            | 44.0 |
| 1272 | 1B | 27934 | IWB27934 | Excalibur_c60106_73      | 44.0 |
| 1273 | 1B | 35875 | IWB35875 | IACX2852                 | 44.0 |
| 1274 | 1B | 5761  | IWB5761  | BS00000651_51            | 44.0 |
| 1275 | 1B | 65947 | IWB65947 | TA005251-0278            | 44.0 |
| 1276 | 1B | 10381 | IWB10381 | BS00069125_51            | 44.0 |
| 1277 | 1B | 7621  | IWB7621  | BS00026338_51            | 44.0 |
| 1278 | 1B | 36152 | IWB36152 | IACX6404                 | 44.0 |
| 1279 | 1B | 5965  | IWB5965  | BS00004328_51            | 44.0 |
| 1280 | 1B | 65251 | IWB65251 | RFL_Contig7_380          | 44.0 |
| 1281 | 1B | 29471 | IWB29471 | Excalibur_c94658_59      | 44.3 |
| 1282 | 1B | 8867  | IWB8867  | BS00062607_51            | 44.3 |
| 1283 | 1B | 9781  | IWB9781  | BS00066338_51            | 44.3 |
| 1284 | 1B | 9548  | IWB9548  | BS00065443_51            | 45.0 |
| 1285 | 1B | 69351 | IWB69351 | Tdurum_contig27860_478   | 45.6 |
| 1286 | 1B | 13742 | IWB13742 | CAP7_c1137_53            | 45.6 |
| 1287 | 1B | 63852 | IWB63852 | RFL_Contig2176_1111      | 46.2 |
| 1288 | 1B | 63853 | IWB63853 | RFL_Contig2176_1163      | 46.2 |
| 1289 | 1B | 41127 | IWB41127 | Kukri_c13978_132         | 46.2 |
| 1290 | 1B | 9208  | IWB9208  | BS00064162_51            | 46.2 |
| 1291 | 1B | 69337 | IWB69337 | Tdurum_contig27843_142   | 46.2 |



|      |    |       |          |                              |      |
|------|----|-------|----------|------------------------------|------|
| 1292 | 1B | 63855 | IWB63855 | RFL_Contig2176_932           | 46.2 |
| 1293 | 1B | 7410  | IWB7410  | BS00023071_51                | 46.2 |
| 1294 | 1B | 73681 | IWB73681 | Tdurum_contig85180_99        | 46.2 |
| 1295 | 1B | 26591 | IWB26591 | Excalibur_c44818_109         | 46.2 |
| 1296 | 1B | 58887 | IWB58887 | RAC875_c52957_154            | 46.2 |
| 1297 | 1B | 64091 | IWB64091 | RFL_Contig2826_1274          | 48.5 |
| 1298 | 1B | 10243 | IWB10243 | BS00068161_51                | 48.5 |
| 1299 | 1B | 2667  | IWB2667  | BobWhite_c34030_646          | 48.5 |
| 1300 | 1B | 64094 | IWB64094 | RFL_Contig2826_614           | 48.5 |
| 1301 | 1B | 58355 | IWB58355 | RAC875_c47427_235            | 48.5 |
| 1302 | 1B | 11283 | IWB11283 | BS00083060_51                | 48.5 |
| 1303 | 1B | 4407  | IWB4407  | BobWhite_c8016_301           | 48.5 |
| 1304 | 1B | 28434 | IWB28434 | Excalibur_c66196_256         | 49.0 |
| 1305 | 1B | 81365 | IWA8246  | wsnp_RFL_Contig1493_681815   | 49.0 |
| 1306 | 1B | 64555 | IWB64555 | RFL_Contig399_859            | 49.3 |
| 1307 | 1B | 72580 | IWB72580 | Tdurum_contig57479_236       | 49.3 |
| 1308 | 1B | 77464 | IWA3017  | wsnp_Ex_c26083_35336771      | 49.3 |
| 1309 | 1B | 18556 | IWB18556 | D_GBUVHFX01API9H_416         | 52.2 |
| 1310 | 1B | 13134 | IWB13134 | CAP11_rep_c7035_189          | 52.2 |
| 1311 | 1B | 11958 | IWB11958 | BS00096498_51                | 53.0 |
| 1312 | 1B | 54063 | IWB54063 | RAC875_c15190_1089           | 53.0 |
| 1313 | 1B | 6808  | IWB6808  | BS00021938_51                | 53.0 |
| 1314 | 1B | 35890 | IWB35890 | IACX2961                     | 53.0 |
| 1315 | 1B | 1416  | IWB1416  | BobWhite_c20621_683          | 53.3 |
| 1316 | 1B | 79597 | IWA5749  | wsnp_Ex_rep_c78209_74462664  | 53.3 |
| 1317 | 1B | 5074  | IWB5074  | BobWhite_rep_c54139_273      | 53.3 |
| 1318 | 1B | 3330  | IWB3330  | BobWhite_c4375_347           | 53.3 |
| 1319 | 1B | 1415  | IWB1415  | BobWhite_c20621_541          | 53.3 |
| 1320 | 1B | 10069 | IWB10069 | BS00067526_51                | 54.1 |
| 1321 | 1B | 23869 | IWB23869 | Excalibur_c22845_180         | 55.2 |
| 1322 | 1B | 41897 | IWB41897 | Kukri_c18109_682             | 55.2 |
| 1323 | 1B | 60344 | IWB60344 | RAC875_c7357_1107            | 55.2 |
| 1324 | 1B | 41896 | IWB41896 | Kukri_c18109_649             | 55.2 |
| 1325 | 1B | 12325 | IWB12325 | BS00107675_51                | 55.2 |
| 1326 | 1B | 6947  | IWB6947  | BS00022176_51                | 55.2 |
| 1327 | 1B | 77837 | IWA3497  | wsnp_Ex_c34765_43024979      | 59.3 |
| 1328 | 1B | 1371  | IWB1371  | BobWhite_c2027_215           | 59.9 |
| 1329 | 1B | 51317 | IWB51317 | Ra_c18630_284                | 59.9 |
| 1330 | 1B | 44898 | IWB44898 | Kukri_c39223_831             | 59.9 |
| 1331 | 1B | 77524 | IWA3097  | wsnp_Ex_c27176_36393952      | 59.9 |
| 1332 | 1B | 1304  | IWB1304  | BobWhite_c19733_149          | 60.1 |
| 1333 | 1B | 56046 | IWB56046 | RAC875_c27273_334            | 60.1 |
| 1334 | 1B | 35108 | IWB35108 | IAAV5863                     | 60.7 |
| 1335 | 1B | 80782 | IWA7422  | wsnp_Ku_rep_c107952_93214466 | 61.5 |
| 1336 | 1B | 35340 | IWB35340 | IAAV7428                     | 61.5 |
| 1337 | 1B | 60663 | IWB60663 | RAC875_c818_1185             | 61.5 |
| 1338 | 1B | 9116  | IWB9116  | BS00063721_51                | 62.1 |
| 1339 | 1B | 26319 | IWB26319 | Excalibur_c42301_54          | 62.4 |
| 1340 | 1B | 5810  | IWB5810  | BS00002484_51                | 63.5 |
| 1341 | 1B | 10454 | IWB10454 | BS00070285_51                | 63.5 |
| 1342 | 1B | 6805  | IWB6805  | BS00021934_51                | 63.8 |
| 1343 | 1B | 69649 | IWB69649 | Tdurum_contig28853_142       | 64.7 |
| 1344 | 1B | 27173 | IWB27173 | Excalibur_c50785_525         | 64.7 |
| 1345 | 1B | 46397 | IWB46397 | Kukri_c5407_192              | 64.7 |

|      |    |       |          |                              |      |
|------|----|-------|----------|------------------------------|------|
| 1346 | 1B | 73738 | IWB73738 | Tdurum_contig8840_575        | 66.7 |
| 1347 | 1B | 73737 | IWB73737 | Tdurum_contig8840_540        | 66.7 |
| 1348 | 1B | 73736 | IWB73736 | Tdurum_contig8840_237        | 66.7 |
| 1349 | 1B | 36293 | IWB36293 | IACX8359                     | 66.7 |
| 1350 | 1B | 11885 | IWB11885 | BS00094562_51                | 66.7 |
| 1351 | 1B | 8840  | IWB8840  | BS00061472_51                | 67.3 |
| 1352 | 1B | 65780 | IWB65780 | TA004059-0492                | 70.3 |
| 1353 | 1B | 44606 | IWB44606 | Kukri_c36758_140             | 70.3 |
| 1354 | 1B | 69701 | IWB69701 | Tdurum_contig29087_628       | 70.5 |
| 1355 | 1B | 69702 | IWB69702 | Tdurum_contig29087_757       | 70.5 |
| 1356 | 1B | 72561 | IWB72561 | Tdurum_contig57153_1356      | 70.5 |
| 1357 | 1B | 31646 | IWB31646 | GENE-0063_68                 | 70.5 |
| 1358 | 1B | 13473 | IWB13473 | CAP12_c590_307               | 70.5 |
| 1359 | 1B | 43860 | IWB43860 | Kukri_c30490_328             | 72.8 |
| 1360 | 1B | 31676 | IWB31676 | GENE-0115_375                | 72.8 |
| 1361 | 1B | 81420 | IWA8332  | wsnp_RFL_Contig2403_1927045  | 72.8 |
| 1362 | 1B | 81191 | IWA7992  | wsnp_Ra_c53181_56932563      | 72.8 |
| 1363 | 1B | 41924 | IWB41924 | Kukri_c18230_1633            | 72.8 |
| 1364 | 1B | 59155 | IWB59155 | RAC875_c55934_165            | 72.8 |
| 1365 | 1B | 4454  | IWB4454  | BobWhite_c8293_236           | 73.1 |
| 1366 | 1B | 75925 | IWA846   | wsnp_CAP11_rep_c4138_1957291 | 73.1 |
| 1367 | 1B | 48895 | IWB48895 | Kukri_rep_c103550_213        | 73.1 |
| 1368 | 1B | 75926 | IWA848   | wsnp_CAP11_rep_c4138_1957470 | 73.1 |
| 1369 | 1B | 8096  | IWB8096  | BS00037246_51                | 73.4 |
| 1370 | 1B | 65512 | IWB65512 | TA002215-1444                | 73.4 |
| 1371 | 1B | 8097  | IWB8097  | BS00037250_51                | 73.4 |
| 1372 | 1B | 78150 | IWA3892  | wsnp_Ex_c4436_7981037        | 73.4 |
| 1373 | 1B | 78151 | IWA3893  | wsnp_Ex_c4436_7981188        | 73.4 |
| 1374 | 1B | 20729 | IWB20729 | Ex_c4436_1947                | 73.4 |
| 1375 | 1B | 22618 | IWB22618 | Excalibur_c15389_501         | 73.4 |
| 1376 | 1B | 47986 | IWB47986 | Kukri_c8395_1352             | 73.4 |
| 1377 | 1B | 34935 | IWB34935 | IAAV4844                     | 73.4 |
| 1378 | 1B | 73865 | IWB73865 | Tdurum_contig93330_263       | 77.2 |
| 1379 | 1B | 78249 | IWA4022  | wsnp_Ex_c48407_53323801      | 77.2 |
| 1380 | 1B | 31941 | IWB31941 | GENE-0514_210                | 77.2 |
| 1381 | 1B | 73912 | IWB73912 | Tdurum_contig94450_255       | 77.2 |
| 1382 | 1B | 66474 | IWB66474 | Tdurum_contig10354_170       | 77.4 |
| 1383 | 1B | 6778  | IWB6778  | BS00021877_51                | 77.4 |
| 1384 | 1B | 41450 | IWB41450 | Kukri_c15757_1117            | 77.4 |
| 1385 | 1B | 56410 | IWB56410 | RAC875_c3001_1236            | 77.4 |
| 1386 | 1B | 21823 | IWB21823 | Excalibur_c11190_617         | 77.4 |
| 1387 | 1B | 66475 | IWB66475 | Tdurum_contig10354_270       | 77.4 |
| 1388 | 1B | 71704 | IWB71704 | Tdurum_contig46647_623       | 77.4 |
| 1389 | 1B | 40850 | IWB40850 | Kukri_c1259_864              | 77.7 |
| 1390 | 1B | 1342  | IWB1342  | BobWhite_c20073_443          | 85.3 |
| 1391 | 1B | 31957 | IWB31957 | GENE-0543_201                | 87.3 |
| 1392 | 1B | 62079 | IWB62079 | RAC875_rep_c111730_97        | 87.5 |
| 1393 | 1B | 49442 | IWB49442 | Kukri_rep_c110309_129        | 87.5 |
| 1394 | 1B | 71898 | IWB71898 | Tdurum_contig4851_653        | 87.5 |
| 1395 | 1B | 9889  | IWB9889  | BS00066805_51                | 87.5 |
| 1396 | 1B | 20993 | IWB20993 | Ex_c6112_1248                | 87.5 |
| 1397 | 1B | 71971 | IWB71971 | Tdurum_contig49509_606       | 87.5 |
| 1398 | 1B | 70859 | IWB70859 | Tdurum_contig42108_958       | 87.5 |
| 1399 | 1B | 11265 | IWB11265 | BS00082577_51                | 87.5 |

|      |    |       |          |                             |      |
|------|----|-------|----------|-----------------------------|------|
| 1400 | 1B | 78964 | IWA4935  | wsnp_Ex_c955_1827567        | 87.5 |
| 1401 | 1B | 38247 | IWB38247 | Ku_c11537_539               | 87.5 |
| 1402 | 1B | 41609 | IWB41609 | Kukri_c16608_659            | 87.8 |
| 1403 | 1B | 72625 | IWB72625 | Tdurum_contig58710_411      | 87.8 |
| 1404 | 1B | 80094 | IWA6511  | wsnp_Ku_c13952_22097856     | 87.8 |
| 1405 | 1B | 12221 | IWB12221 | BS00104270_51               | 87.8 |
| 1406 | 1B | 63988 | IWB63988 | RFL_Contig2550_679          | 87.8 |
| 1407 | 1B | 72218 | IWB72218 | Tdurum_contig51922_676      | 87.8 |
| 1408 | 1B | 72626 | IWB72626 | Tdurum_contig58710_516      | 87.8 |
| 1409 | 1B | 24349 | IWB24349 | Excalibur_c25640_110        | 87.8 |
| 1410 | 1B | 71384 | IWB71384 | Tdurum_contig42960_865      | 87.8 |
| 1411 | 1B | 7641  | IWB7641  | BS00027006_51               | 87.8 |
| 1412 | 1B | 73820 | IWB73820 | Tdurum_contig92835_177      | 87.8 |
| 1413 | 1D | 29495 | IWB29495 | Excalibur_c9509_1180        | 0.0  |
| 1414 | 1D | 11805 | IWB11805 | BS00093336_51               | 0.0  |
| 1415 | 1D | 47116 | IWB47116 | Kukri_c64049_279            | 0.0  |
| 1416 | 1D | 11803 | IWB11803 | BS00093325_51               | 0.0  |
| 1417 | 1D | 44563 | IWB44563 | Kukri_c36351_64             | 0.0  |
| 1418 | 1D | 19471 | IWB19471 | D_GDS7LZN02IXNP1_255        | 0.0  |
| 1419 | 1D | 58459 | IWB58459 | RAC875_c48669_292           | 0.0  |
| 1420 | 1D | 53205 | IWB53205 | RAC875_c10925_1887          | 0.0  |
| 1421 | 1D | 42917 | IWB42917 | Kukri_c2408_784             | 0.0  |
| 1422 | 1D | 46457 | IWB46457 | Kukri_c54820_382            | 0.0  |
| 1423 | 1D | 15585 | IWB15585 | D_contig10739_363           | 1.5  |
| 1424 | 1D | 78041 | IWA3753  | wsnp_Ex_c41048_47969948     | 1.5  |
| 1425 | 1D | 79763 | IWA5996  | wsnp_JD_c3091_4079762       | 1.5  |
| 1426 | 1D | 5769  | IWB5769  | BS00000744_51               | 1.5  |
| 1427 | 1D | 8742  | IWB8742  | BS00058612_51               | 3.8  |
| 1428 | 1D | 5897  | IWB5897  | BS00003806_51               | 4.1  |
| 1429 | 1D | 59230 | IWB59230 | RAC875_c56811_258           | 9.9  |
| 1430 | 1D | 28966 | IWB28966 | Excalibur_c8065_1275        | 10.2 |
| 1431 | 1D | 44725 | IWB44725 | Kukri_c37718_187            | 10.2 |
| 1432 | 1D | 38211 | IWB38211 | Ku_c111306_371              | 10.2 |
| 1433 | 1D | 36527 | IWB36527 | Jagger_c3179_499            | 10.2 |
| 1434 | 1D | 38212 | IWB38212 | Ku_c111306_399              | 10.2 |
| 1435 | 1D | 30124 | IWB30124 | Excalibur_rep_c105429_528   | 10.2 |
| 1436 | 1D | 30125 | IWB30125 | Excalibur_rep_c105429_654   | 10.2 |
| 1437 | 1D | 76546 | IWA1789  | wsnp_Ex_c1358_2602235       | 10.4 |
| 1438 | 1D | 47970 | IWB47970 | Kukri_c837_436              | 10.4 |
| 1439 | 1D | 76921 | IWA2269  | wsnp_Ex_c17884_26647952     | 10.4 |
| 1440 | 1D | 76544 | IWA1787  | wsnp_Ex_c1358_2600929       | 10.4 |
| 1441 | 1D |       | cf15     |                             | 12.1 |
| 1442 | 1D | 576   | IWB576   | BobWhite_c14032_133         | 15.1 |
| 1443 | 1D | 79317 | IWA5371  | wsnp_Ex_rep_c67198_65703538 | 15.1 |
| 1444 | 1D | 577   | IWB577   | BobWhite_c14032_277         | 15.1 |
| 1445 | 1D | 41724 | IWB41724 | Kukri_c17177_1575           | 15.1 |
| 1446 | 1D | 38400 | IWB38400 | Ku_c13622_482               | 15.1 |
| 1447 | 1D | 80174 | IWA6621  | wsnp_Ku_c17177_26216230     | 15.1 |
| 1448 | 1D | 80087 | IWA6500  | wsnp_Ku_c13622_21660346     | 15.1 |
| 1449 | 1D | 22674 | IWB22674 | Excalibur_c15692_532        | 16.2 |
| 1450 | 1D | 75838 | IWA713   | wsnp_CAP11_c2307_1200406    | 16.2 |
| 1451 | 1D | 11602 | IWB11602 | BS00089269_51               | 16.2 |
| 1452 | 1D | 22866 | IWB22866 | Excalibur_c16851_142        | 16.2 |
| 1453 | 1D | 11603 | IWB11603 | BS00089270_51               | 16.2 |

|      |    |       |          |                              |      |
|------|----|-------|----------|------------------------------|------|
| 1454 | 1D | 55539 | IWB55539 | RAC875_c23587_548            | 16.2 |
| 1455 | 1D | 63609 | IWB63609 | RFL_Contig1338_2062          | 16.2 |
| 1456 | 1D | 10735 | IWB10735 | BS00074370_51                | 16.2 |
| 1457 | 1D | 65070 | IWB65070 | RFL_Contig5639_1168          | 16.2 |
| 1458 | 1D | 14612 | IWB14612 | CAP8_c2401_433               | 16.7 |
| 1459 | 1D | 14343 | IWB14343 | CAP7_c973_156                | 16.7 |
| 1460 | 1D | 27614 | IWB27614 | Excalibur_c55959_651         | 16.7 |
| 1461 | 1D | 35395 | IWB35395 | IAAV7856                     | 16.7 |
| 1462 | 1D | 18113 | IWB18113 | D_GB5Y7FA02I369B_378         | 17.0 |
| 1463 | 1D | 60471 | IWB60471 | RAC875_c7752_145             | 17.0 |
| 1464 | 1D | 60470 | IWB60470 | RAC875_c7752_1223            | 17.0 |
| 1465 | 1D | 60473 | IWB60473 | RAC875_c7752_549             | 17.0 |
| 1466 | 1D | 18072 | IWB18072 | D_GB5Y7FA02G8CHU_124         | 17.0 |
| 1467 | 1D | 60472 | IWB60472 | RAC875_c7752_2913            | 17.0 |
| 1468 | 1D | 21002 | IWB21002 | Ex_c6145_2193                | 17.0 |
| 1469 | 1D | 21003 | IWB21003 | Ex_c6145_833                 | 17.0 |
| 1470 | 1D | 15128 | IWB15128 | D_contig00332_312            | 17.3 |
| 1471 | 1D | 31245 | IWB31245 | Excalibur_rep_c75168_337     | 17.9 |
| 1472 | 1D |       | cf61     |                              | 18.2 |
| 1473 | 1D | 13406 | IWB13406 | CAP12_c46_333                | 18.7 |
| 1474 | 1D | 56136 | IWB56136 | RAC875_c27954_378            | 20.1 |
| 1475 | 1D | 17484 | IWB17484 | D_F5XZDLF01A85DT_301         | 21.0 |
| 1476 | 1D | 36377 | IWB36377 | IACX9354                     | 21.0 |
| 1477 | 1D | 35354 | IWB35354 | IAAV7510                     | 21.0 |
| 1478 | 1D | 33350 | IWB33350 | GENE-3348_203                | 27.3 |
| 1479 | 1D | 22792 | IWB22792 | Excalibur_c16452_624         | 28.2 |
| 1480 | 1D | 75586 | IWA362   | wsnp_BE586140D_Ta_2_2        | 31.2 |
| 1481 | 1D | 59651 | IWB59651 | RAC875_c62_1546              | 31.2 |
| 1482 | 1D | 65040 | IWB65040 | RFL_Contig5594_1283          | 31.2 |
| 1483 | 1D | 5768  | IWB5768  | BS00000721_51                | 31.2 |
| 1484 | 1D | 75370 | IWA57    | wsnp_BE405518D_Ta_2_3        | 31.2 |
| 1485 | 1D | 65041 | IWB65041 | RFL_Contig5594_873           | 31.2 |
| 1486 | 1D | 59652 | IWB59652 | RAC875_c62_321               | 31.2 |
| 1487 | 1D | 59650 | IWB59650 | RAC875_c62_1514              | 31.2 |
| 1488 | 1D | 5767  | IWB5767  | BS00000717_51                | 31.2 |
| 1489 | 1D | 79030 | IWA5020  | wsnp_Ex_rep_c101500_86856679 | 31.4 |
| 1490 | 1D | 78694 | IWA4598  | wsnp_Ex_c6974_12025571       | 31.4 |
| 1491 | 1D | 79028 | IWA5018  | wsnp_Ex_rep_c101500_86856089 | 31.4 |
| 1492 | 1D | 36051 | IWB36051 | IACX589                      | 31.7 |
| 1493 | 1D | 6766  | IWB6766  | BS00021851_51                | 37.8 |
| 1494 | 1D | 3828  | IWB3828  | BobWhite_c5419_643           | 38.1 |
| 1495 | 1D | 35153 | IWB35153 | IAAV614                      | 38.1 |
| 1496 | 1D | 16859 | IWB16859 | D_contig52961_535            | 38.4 |
| 1497 | 1D | 35981 | IWB35981 | IACX5018                     | 38.4 |
| 1498 | 1D | 5496  | IWB5496  | BobWhite_rep_c64736_316      | 38.4 |
| 1499 | 1D | 70583 | IWB70583 | Tdurum_contig36962_250       | 38.4 |
| 1500 | 1D | 16721 | IWB16721 | D_contig37339_168            | 38.4 |
| 1501 | 1D | 43011 | IWB43011 | Kukri_c24648_262             | 38.4 |
| 1502 | 1D | 76087 | IWA1193  | wsnp_CAP8_c458_368155        | 38.4 |
| 1503 | 1D | 35012 | IWB35012 | IAAV5348                     | 38.4 |
| 1504 | 1D | 76086 | IWA1192  | wsnp_CAP8_c458_368125        | 38.4 |
| 1505 | 1D | 35669 | IWB35669 | IACX11153                    | 38.4 |
| 1506 | 1D | 9793  | IWB9793  | BS00066395_51                | 38.4 |
| 1507 | 1D | 42544 | IWB42544 | Kukri_c21718_661             | 38.4 |

|      |    |       |          |                       |      |
|------|----|-------|----------|-----------------------|------|
| 1508 | 1D | 35725 | IWB35725 | IACX12270             | 38.4 |
| 1509 | 1D | 25427 | IWB25427 | Excalibur_c34167_128  | 38.4 |
| 1510 | 1D | 23596 | IWB23596 | Excalibur_c21172_952  | 38.4 |
| 1511 | 1D | 9791  | IWB9791  | BS00066391_51         | 38.4 |
| 1512 | 1D | 7925  | IWB7925  | BS00033405_51         | 38.4 |
| 1513 | 1D | 5949  | IWB5949  | BS00004145_51         | 38.4 |
| 1514 | 1D | 63182 | IWB63182 | RAC875_rep_c81479_191 | 38.4 |
| 1515 | 1D | 50368 | IWB50368 | Kukri_rep_c79478_1209 | 38.4 |
| 1516 | 1D | 46138 | IWB46138 | Kukri_c5113_1082      | 38.4 |
| 1517 | 1D | 10099 | IWB10099 | BS00067620_51         | 38.4 |
| 1518 | 1D | 4433  | IWB4433  | BobWhite_c816_289     | 38.4 |
| 1519 | 1D | 19211 | IWB19211 | D_GDRF1KQ02G72YO_156  | 38.4 |
| 1520 | 1D | 62577 | IWB62577 | RAC875_rep_c69508_215 | 38.4 |
| 1521 | 1D | 60962 | IWB60962 | RAC875_c8932_740      | 38.4 |
| 1522 | 1D | 58499 | IWB58499 | RAC875_c48997_1160    | 38.4 |
| 1523 | 1D | 57310 | IWB57310 | RAC875_c3762_710      | 38.4 |
| 1524 | 1D | 46338 | IWB46338 | Kukri_c53398_200      | 38.4 |
| 1525 | 1D | 46003 | IWB46003 | Kukri_c49577_630      | 38.4 |
| 1526 | 1D | 34920 | IWB34920 | IAAV4760              | 38.4 |
| 1527 | 1D | 26805 | IWB26805 | Excalibur_c46695_219  | 38.4 |
| 1528 | 1D | 34926 | IWB34926 | IAAV4794              | 38.4 |
| 1529 | 1D | 10919 | IWB10919 | BS00077237_51         | 38.4 |
| 1530 | 1D | 7530  | IWB7530  | BS00024262_51         | 38.9 |
| 1531 | 1D | 26128 | IWB26128 | Excalibur_c4030_1770  | 38.9 |
| 1532 | 1D | 46950 | IWB46950 | Kukri_c6167_1271      | 38.9 |
| 1533 | 1D | 15847 | IWB15847 | D_contig16934_681     | 39.2 |
| 1534 | 1D | 45478 | IWB45478 | Kukri_c44738_477      | 39.2 |
| 1535 | 1D | 48513 | IWB48513 | Kukri_c9864_1220      | 39.2 |
| 1536 | 1D | 42384 | IWB42384 | Kukri_c20844_116      | 39.2 |
| 1537 | 1D | 43803 | IWB43803 | Kukri_c3008_329       | 39.2 |
| 1538 | 1D | 57040 | IWB57040 | RAC875_c35094_476     | 39.2 |
| 1539 | 1D | 13348 | IWB13348 | CAP12_c2978_93        | 39.2 |
| 1540 | 1D | 9571  | IWB9571  | BS00065510_51         | 39.2 |
| 1541 | 1D | 9623  | IWB9623  | BS00065722_51         | 39.2 |
| 1542 | 1D | 48514 | IWB48514 | Kukri_c9864_936       | 39.2 |
| 1543 | 1D | 10763 | IWB10763 | BS00074817_51         | 39.2 |
| 1544 | 1D | 10598 | IWB10598 | BS00072193_51         | 39.2 |
| 1545 | 1D | 75448 | IWA165   | wsnp_BE445121D_Ta_2_2 | 39.5 |
| 1546 | 1D | 11878 | IWB11878 | BS00094471_51         | 39.5 |
| 1547 | 1D | 27894 | IWB27894 | Excalibur_c5958_1398  | 39.5 |
| 1548 | 1D | 60722 | IWB60722 | RAC875_c82888_83      | 39.5 |
| 1549 | 1D | 9132  | IWB9132  | BS00063799_51         | 39.5 |
| 1550 | 1D | 7851  | IWB7851  | BS00031658_51         | 39.5 |
| 1551 | 1D | 14969 | IWB14969 | CAP8_c879_120         | 39.5 |
| 1552 | 1D | 49565 | IWB49565 | Kukri_rep_c112609_711 | 42.7 |
| 1553 | 1D | 17549 | IWB17549 | D_F5XZDLF01D3SI3_114  | 46.6 |
| 1554 | 1D | 26243 | IWB26243 | Excalibur_c4151_166   | 46.6 |
| 1555 | 1D |       | cf72     |                       | 46.6 |
| 1556 | 1D | 6869  | IWB6869  | BS00022027_51         | 49.6 |
| 1557 | 1D | 15872 | IWB15872 | D_contig17513_167     | 49.9 |
| 1558 | 1D |       | wmc429   |                       | 50.5 |
| 1559 | 1D | 20523 | IWB20523 | Ex_c33668_180         | 51.0 |
| 1560 | 1D | 27449 | IWB27449 | Excalibur_c54055_694  | 53.0 |
| 1561 | 1D | 57780 | IWB57780 | RAC875_c41812_1998    | 53.6 |

|      |    |       |          |                             |      |
|------|----|-------|----------|-----------------------------|------|
| 1562 | 1D | 46903 | IWB46903 | Kukri_c61049_205            | 53.6 |
| 1563 | 1D | 15913 | IWB15913 | D_contig18159_408           | 53.6 |
| 1564 | 1D | 17017 | IWB17017 | D_contig66051_204           | 54.2 |
| 1565 | 1D | 42195 | IWB42195 | Kukri_c19768_568            | 61.2 |
| 1566 | 1D | 15740 | IWB15740 | D_contig14507_369           | 61.8 |
| 1567 | 1D | 17397 | IWB17397 | D_F5MV3MU01AQZAG_388        | 63.2 |
| 1568 | 1D | 75717 | IWA555   | wsnp_BG313767D_Ta_2_1       | 65.2 |
| 1569 | 1D | 11766 | IWB11766 | BS00092585_51               | 66.6 |
| 1570 | 1D | 81390 | IWA8286  | wsnp_RFL_Contig2036_1264133 | 66.6 |
| 1571 | 1D | 205   | IWB205   | BobWhite_c11338_605         | 66.9 |
| 1572 | 1D | 41029 | IWB41029 | Kukri_c1338_646             | 66.9 |
| 1573 | 1D | 65822 | IWB65822 | TA004358-0724               | 71.1 |
| 1574 | 1D | 35382 | IWB35382 | IAAV7745                    | 71.1 |
| 1575 | 1D | 77462 | IWA3013  | wsnp_Ex_c25974_35235456     | 71.1 |
| 1576 | 1D | 76502 | IWA1737  | wsnp_Ex_c1318_2520706       | 71.1 |
| 1577 | 1D | 79885 | IWA6186  | wsnp_JD_c8173_9207415       | 71.1 |
| 1578 | 1D | 78684 | IWA4585  | wsnp_Ex_c6920_11928994      | 71.1 |
| 1579 | 1D | 77531 | IWA3108  | wsnp_Ex_c27290_36498531     | 71.1 |
| 1580 | 1D | 80595 | IWA7171  | wsnp_Ku_c5560_9853214       | 71.1 |
| 1581 | 1D | 80594 | IWA7170  | wsnp_Ku_c5560_9851459       | 71.1 |
| 1582 | 1D | 78686 | IWA4587  | wsnp_Ex_c6920_11929748      | 71.1 |
| 1583 | 1D | 78497 | IWA4343  | wsnp_Ex_c57601_59245549     | 71.1 |
| 1584 | 1D | 80298 | IWA6791  | wsnp_Ku_c2624_4986980       | 71.1 |
| 1585 | 1D | 23271 | IWB23271 | Excalibur_c19237_895        | 71.1 |
| 1586 | 1D | 64429 | IWB64429 | RFL_Contig3622_1217         | 71.1 |
| 1587 | 1D | 2577  | IWB2577  | BobWhite_c3283_54           | 71.1 |
| 1588 | 1D | 7764  | IWB7764  | BS00030252_51               | 71.1 |
| 1589 | 1D | 57155 | IWB57155 | RAC875_c3604_1527           | 71.1 |
| 1590 | 1D | 77530 | IWA3107  | wsnp_Ex_c27290_36498462     | 71.1 |
| 1591 | 1D | 76501 | IWA1736  | wsnp_Ex_c1318_2519998       | 71.1 |
| 1592 | 1D | 52465 | IWB52465 | Ra_c69361_411               | 71.1 |
| 1593 | 1D | 78685 | IWA4586  | wsnp_Ex_c6920_11929171      | 71.1 |
| 1594 | 1D | 59019 | IWB59019 | RAC875_c54260_127           | 71.1 |
| 1595 | 1D | 18403 | IWB18403 | D_GBF1XID01DNWRS_378        | 71.1 |
| 1596 | 1D | 146   | IWB146   | BobWhite_c10977_834         | 71.1 |
| 1597 | 1D | 78496 | IWA4342  | wsnp_Ex_c57601_59245380     | 71.1 |
| 1598 | 1D | 39618 | IWB39618 | Ku_c5560_2665               | 71.1 |
| 1599 | 1D | 15375 | IWB15375 | D_contig06122_208           | 71.1 |
| 1600 | 1D | 11061 | IWB11061 | BS00079095_51               | 71.1 |
| 1601 | 1D | 5962  | IWB5962  | BS00004282_51               | 71.1 |
| 1602 | 1D | 57981 | IWB57981 | RAC875_c43831_91            | 71.1 |
| 1603 | 1D | 78843 | IWA4777  | wsnp_Ex_c8188_13842273      | 72.5 |
| 1604 | 1D | 29010 | IWB29010 | Excalibur_c8188_243         | 72.5 |
| 1605 | 1D | 77947 | IWA3638  | wsnp_Ex_c3831_6966926       | 72.5 |
| 1606 | 1D | 81143 | IWA7921  | wsnp_Ra_c4135_7565040       | 72.5 |
| 1607 | 1D | 57713 | IWB57713 | RAC875_c4135_1028           | 72.5 |
| 1608 | 1D | 43648 | IWB43648 | Kukri_c29121_654            | 72.5 |
| 1609 | 1D | 40888 | IWB40888 | Kukri_c12758_2101           | 72.5 |
| 1610 | 1D | 76726 | IWA2021  | wsnp_Ex_c15396_23659859     | 72.8 |
| 1611 | 1D | 58572 | IWB58572 | RAC875_c49612_102           | 72.8 |
| 1612 | 1D | 46866 | IWB46866 | Kukri_c6051_640             | 72.8 |
| 1613 | 1D | 11260 | IWB11260 | BS00082503_51               | 72.8 |
| 1614 | 1D | 7250  | IWB7250  | BS00022768_51               | 72.8 |
| 1615 | 1D | 31938 | IWB31938 | GENE-0511_161               | 72.8 |

|      |    |       |          |                             |       |
|------|----|-------|----------|-----------------------------|-------|
| 1616 | 1D | 10778 | IWB10778 | BS00075001_51               | 72.8  |
| 1617 | 1D | 8739  | IWB8739  | BS00058554_51               | 72.8  |
| 1618 | 1D | 31940 | IWB31940 | GENE-0511_484               | 72.8  |
| 1619 | 1D | 79467 | IWA5577  | wsnp_Ex_rep_c69024_67924125 | 72.8  |
| 1620 | 1D | 31799 | IWB31799 | GENE-0315_356               | 73.0  |
| 1621 | 1D | 79203 | IWA5232  | wsnp_Ex_rep_c66423_64640941 | 73.0  |
| 1622 | 1D | 36000 | IWB36000 | IACX5695                    | 73.0  |
| 1623 | 1D | 6723  | IWB6723  | BS00021702_51               | 73.0  |
| 1624 | 1D | 12851 | IWB12851 | CAP11_c3464_68              | 73.0  |
| 1625 | 1D | 79204 | IWA5234  | wsnp_Ex_rep_c66423_64641115 | 73.0  |
| 1626 | 1D | 9742  | IWB9742  | BS00066188_51               | 73.6  |
| 1627 | 1D | 7679  | IWB7679  | BS00028216_51               | 74.1  |
| 1628 | 1D | 35261 | IWB35261 | IAAV6873                    | 74.1  |
| 1629 | 1D | 50995 | IWB50995 | Ra_c1211_1656               | 74.1  |
| 1630 | 1D | 40766 | IWB40766 | Kukri_c12183_262            | 74.4  |
| 1631 | 1D | 51772 | IWB51772 | Ra_c3045_1739               | 74.4  |
| 1632 | 1D | 27436 | IWB27436 | Excalibur_c53900_86         | 75.0  |
| 1633 | 1D | 80961 | IWA7675  | wsnp_Ra_c17989_26960545     | 75.2  |
| 1634 | 1D | 50983 | IWB50983 | Ra_c11906_1618              | 75.5  |
| 1635 | 1D | 50981 | IWB50981 | Ra_c11906_1441              | 75.5  |
| 1636 | 1D | 65240 | IWB65240 | RFL_Contig651_953           | 75.5  |
| 1637 | 1D | 5900  | IWB5900  | BS00003816_51               | 77.8  |
| 1638 | 1D | 10655 | IWB10655 | BS00073257_51               | 77.8  |
| 1639 | 1D | 9896  | IWB9896  | BS00066855_51               | 77.8  |
| 1640 | 1D | 14873 | IWB14873 | CAP8_c6630_63               | 88.1  |
| 1641 | 1D | 6958  | IWB6958  | BS00022188_51               | 95.6  |
| 1642 | 1D | 31209 | IWB31209 | Excalibur_rep_c72906_71     | 95.6  |
| 1643 | 1D | 35836 | IWB35836 | IACX21015                   | 95.6  |
| 1644 | 1D | 35902 | IWB35902 | IACX314                     | 104.7 |
| 1645 | 1D | 47464 | IWB47464 | Kukri_c6896_3239            | 107.1 |
| 1646 | 1D | 40950 | IWB40950 | Kukri_c13039_858            | 107.3 |
| 1647 | 1D | 35900 | IWB35900 | IACX310                     | 112.5 |
| 1648 | 1D | 65919 | IWB65919 | TA005039-1480               | 112.5 |
| 1649 | 1D | 10690 | IWB10690 | BS00073763_51               | 112.8 |
| 1650 | 1D | 15906 | IWB15906 | D_contig18068_87            | 113.4 |
| 1651 | 1D | 16637 | IWB16637 | D_contig35303_117           | 114.2 |
| 1652 | 1D | 48119 | IWB48119 | Kukri_c875_126              | 114.2 |
| 1653 | 1D | 24638 | IWB24638 | Excalibur_c27873_266        | 114.2 |
| 1654 | 1D | 644   | IWB644   | BobWhite_c14422_282         | 114.2 |
| 1655 | 1D | 6051  | IWB6051  | BS00009377_51               | 114.2 |
| 1656 | 1D | 9069  | IWB9069  | BS00063511_51               | 115.6 |
| 1657 | 1D | 64331 | IWB64331 | RFL_Contig3395_1575         | 116.8 |
| 1658 | 1D | 7196  | IWB7196  | BS00022654_51               | 119.0 |
| 1659 | 1D | 17626 | IWB17626 | D_F5XZDLF02GY0X2_81         | 119.9 |
| 1660 | 1D | 48805 | IWB48805 | Kukri_rep_c102822_374       | 119.9 |
| 1661 | 1D | 19016 | IWB19016 | D_GDEEGVY01DD44S_389        | 119.9 |
| 1662 | 1D | 19234 | IWB19234 | D_GDRF1KQ02I64JW_273        | 119.9 |
| 1663 | 1D | 6105  | IWB6105  | BS00009738_51               | 119.9 |
| 1664 | 1D | 69918 | IWB69918 | Tdurum_contig29915_167      | 119.9 |
| 1665 | 1D | 6360  | IWB6360  | BS00011168_51               | 119.9 |
| 1666 | 1D | 29609 | IWB29609 | Excalibur_c981_294          | 119.9 |
| 1667 | 1D | 36840 | IWB36840 | Jagger_rep_c10625_88        | 119.9 |
| 1668 | 1D | 2612  | IWB2612  | BobWhite_c33208_98          | 119.9 |
| 1669 | 1D | 48948 | IWB48948 | Kukri_rep_c104078_655       | 119.9 |

|      |    |       |          |                             |       |
|------|----|-------|----------|-----------------------------|-------|
| 1670 | 1D | 25694 | IWB25694 | Excalibur_c36269_513        | 119.9 |
| 1671 | 1D | 5347  | IWB5347  | BobWhite_rep_c63205_143     | 119.9 |
| 1672 | 1D | 8770  | IWB8770  | BS00059313_51               | 119.9 |
| 1673 | 1D | 16627 | IWB16627 | D_contig35004_260           | 119.9 |
| 1674 | 1D | 17052 | IWB17052 | D_contig68025_825           | 120.7 |
| 1675 | 2A | 12250 | IWB12250 | BS00105593_51               | 0.0   |
| 1676 | 2A | 76319 | IWA1511  | wsnp_Ex_c11560_18632698     | 0.3   |
| 1677 | 2A | 14640 | IWB14640 | CAP8_c2783_336              | 0.3   |
| 1678 | 2A | 77034 | IWA2425  | wsnp_Ex_c19516_28481857     | 0.3   |
| 1679 | 2A | 66102 | IWB66102 | TA012412-0412               | 0.3   |
| 1680 | 2A | 80266 | IWA6745  | wsnp_Ku_c23598_33524490     | 0.3   |
| 1681 | 2A | 64569 | IWB64569 | RFL_Contig4030_493          | 0.3   |
| 1682 | 2A | 490   | IWB490   | BobWhite_c13373_250         | 0.3   |
| 1683 | 2A | 63717 | IWB63717 | RFL_Contig174_406           | 0.3   |
| 1684 | 2A | 42601 | IWB42601 | Kukri_c22152_730            | 0.3   |
| 1685 | 2A | 30883 | IWB30883 | Excalibur_rep_c67619_217    | 0.3   |
| 1686 | 2A | 79294 | IWA5340  | wsnp_Ex_rep_c66982_65423289 | 0.3   |
| 1687 | 2A | 79356 | IWA5423  | wsnp_Ex_rep_c67619_66272209 | 0.3   |
| 1688 | 2A | 20060 | IWB20060 | Ex_c19516_3687              | 0.3   |
| 1689 | 2A | 76359 | IWA1563  | wsnp_Ex_c11950_19164191     | 0.3   |
| 1690 | 2A | 72491 | IWB72491 | Tdurum_contig56157_1748     | 0.3   |
| 1691 | 2A | 76320 | IWA1512  | wsnp_Ex_c11560_18632777     | 0.3   |
| 1692 | 2A | 30800 | IWB30800 | Excalibur_rep_c66982_126    | 0.3   |
| 1693 | 2A | 80003 | IWA6391  | wsnp_Ku_c10418_17237935     | 0.3   |
| 1694 | 2A | 79295 | IWA5341  | wsnp_Ex_rep_c66982_65424063 | 0.3   |
| 1695 | 2A | 7398  | IWB7398  | BS00023052_51               | 0.3   |
| 1696 | 2A | 72490 | IWB72490 | Tdurum_contig56157_1595     | 0.3   |
| 1697 | 2A | 17107 | IWB17107 | D_contig71899_62            | 1.5   |
| 1698 | 2A | 4070  | IWB4070  | BobWhite_c6032_343          | 1.5   |
| 1699 | 2A | 37791 | IWB37791 | JD_c7328_640                | 1.5   |
| 1700 | 2A | 5945  | IWB5945  | BS00004089_51               | 1.5   |
| 1701 | 2A | 18862 | IWB18862 | D_GCE8AKX02FU286_163        | 1.5   |
| 1702 | 2A | 7792  | IWB7792  | BS00030721_51               | 1.5   |
| 1703 | 2A | 3678  | IWB3678  | BobWhite_c48552_673         | 1.5   |
| 1704 | 2A | 5374  | IWB5374  | BobWhite_rep_c63376_215     | 1.5   |
| 1705 | 2A | 6542  | IWB6542  | BS00012249_51               | 1.5   |
| 1706 | 2A | 26872 | IWB26872 | Excalibur_c4748_859         | 1.5   |
| 1707 | 2A | 3679  | IWB3679  | BobWhite_c48552_702         | 1.5   |
| 1708 | 2A | 7245  | IWB7245  | BS00022760_51               | 1.5   |
| 1709 | 2A | 22184 | IWB22184 | Excalibur_c12980_2621       | 1.5   |
| 1710 | 2A | 365   | IWB365   | BobWhite_c12426_84          | 1.5   |
| 1711 | 2A | 10561 | IWB10561 | BS00071630_51               | 1.5   |
| 1712 | 2A | 57536 | IWB57536 | RAC875_c39634_370           | 1.5   |
| 1713 | 2A | 77751 | IWA3382  | wsnp_Ex_c322_624793         | 1.5   |
| 1714 | 2A | 35651 | IWB35651 | IACX11028                   | 1.5   |
| 1715 | 2A | 11669 | IWB11669 | BS00090701_51               | 1.5   |
| 1716 | 2A | 57199 | IWB57199 | RAC875_c36586_321           | 1.5   |
| 1717 | 2A | 10983 | IWB10983 | BS00078051_51               | 1.5   |
| 1718 | 2A | 57200 | IWB57200 | RAC875_c36586_360           | 1.5   |
| 1719 | 2A | 23116 | IWB23116 | Excalibur_c18324_390        | 1.5   |
| 1720 | 2A | 12523 | IWB12523 | BS00110397_51               | 1.5   |
| 1721 | 2A | 73231 | IWB73231 | Tdurum_contig74742_822      | 1.5   |
| 1722 | 2A | 32605 | IWB32605 | GENE-1711_304               | 1.5   |
| 1723 | 2A | 24342 | IWB24342 | Excalibur_c25599_358        | 1.5   |



|      |    |       |          |                              |      |
|------|----|-------|----------|------------------------------|------|
| 1724 | 2A | 44018 | IWB44018 | Kukri_c31776_1621            | 1.5  |
| 1725 | 2A | 42762 | IWB42762 | Kukri_c23195_266             | 1.5  |
| 1726 | 2A | 65810 | IWB65810 | TA004277-1088                | 1.5  |
| 1727 | 2A | 39416 | IWB39416 | Ku_c42579_870                | 1.5  |
| 1728 | 2A | 73490 | IWB73490 | Tdurum_contig8121_132        | 1.5  |
| 1729 | 2A | 7056  | IWB7056  | BS00022393_51                | 1.5  |
| 1730 | 2A | 35430 | IWB35430 | IAAV8116                     | 1.5  |
| 1731 | 2A | 73151 | IWB73151 | Tdurum_contig69643_287       | 1.5  |
| 1732 | 2A | 34514 | IWB34514 | IAAV2182                     | 1.5  |
| 1733 | 2A | 7032  | IWB7032  | BS00022331_51                | 1.5  |
| 1734 | 2A | 1987  | IWB1987  | BobWhite_c26296_83           | 1.5  |
| 1735 | 2A | 21361 | IWB21361 | Ex_c8173_453                 | 1.5  |
| 1736 | 2A | 10217 | IWB10217 | BS00068050_51                | 1.5  |
| 1737 | 2A | 73389 | IWB73389 | Tdurum_contig76595_208       | 1.5  |
| 1738 | 2A | 68413 | IWB68413 | Tdurum_contig15440_616       | 1.5  |
| 1739 | 2A | 45191 | IWB45191 | Kukri_c42095_196             | 10.5 |
| 1740 | 2A | 43984 | IWB43984 | Kukri_c31508_91              | 10.7 |
| 1741 | 2A | 53862 | IWB53862 | RAC875_c14082_2606           | 10.7 |
| 1742 | 2A | 59725 | IWB59725 | RAC875_c62936_139            | 10.7 |
| 1743 | 2A | 66103 | IWB66103 | TA012416-0590                | 10.7 |
| 1744 | 2A | 76112 | IWA1242  | wsnp_CAP8_rep_c9132_3977980  | 11.0 |
| 1745 | 2A | 53380 | IWB53380 | RAC875_c11652_544            | 11.3 |
| 1746 | 2A | 1365  | IWB1365  | BobWhite_c2022_245           | 11.3 |
| 1747 | 2A | 12769 | IWB12769 | CAP11_c2293_200              | 11.3 |
| 1748 | 2A | 4006  | IWB4006  | BobWhite_c58481_104          | 11.5 |
| 1749 | 2A | 76079 | IWA1166  | wsnp_CAP8_c2110_1147974      | 11.5 |
| 1750 | 2A | 79604 | IWA5760  | wsnp_Ex_rep_c93362_82371808  | 11.5 |
| 1751 | 2A | 79605 | IWA5762  | wsnp_Ex_rep_c93362_82371891  | 11.5 |
| 1752 | 2A | 15066 | IWB15066 | CAP8_rep_c8022_270           | 11.5 |
| 1753 | 2A | 13159 | IWB13159 | CAP11_rep_c9060_520          | 11.5 |
| 1754 | 2A | 31703 | IWB31703 | GENE-0137_147                | 12.4 |
| 1755 | 2A | 11359 | IWB11359 | BS00084333_51                | 12.4 |
| 1756 | 2A | 16752 | IWB16752 | D_contig38301_325            | 12.7 |
| 1757 | 2A | 7112  | IWB7112  | BS00022487_51                | 12.9 |
| 1758 | 2A | 36297 | IWB36297 | IACX8391                     | 12.9 |
| 1759 | 2A | 44249 | IWB44249 | Kukri_c33779_1069            | 12.9 |
| 1760 | 2A | 47995 | IWB47995 | Kukri_c84087_154             | 12.9 |
| 1761 | 2A | 43373 | IWB43373 | Kukri_c27040_309             | 12.9 |
| 1762 | 2A | 6086  | IWB6086  | BS00009604_51                | 12.9 |
| 1763 | 2A | 54980 | IWB54980 | RAC875_c20273_823            | 12.9 |
| 1764 | 2A | 1280  | IWB1280  | BobWhite_c19433_329          | 12.9 |
| 1765 | 2A | 13985 | IWB13985 | CAP7_c3132_150               | 12.9 |
| 1766 | 2A | 31705 | IWB31705 | GENE-0137_1660               | 12.9 |
| 1767 | 2A | 1830  | IWB1830  | BobWhite_c24495_282          | 12.9 |
| 1768 | 2A | 4418  | IWB4418  | BobWhite_c8085_498           | 12.9 |
| 1769 | 2A | 5988  | IWB5988  | BS00004724_51                | 12.9 |
| 1770 | 2A | 10837 | IWB10837 | BS00075855_51                | 12.9 |
| 1771 | 2A | 79082 | IWA5087  | wsnp_Ex_rep_c103167_88181968 | 14.7 |
| 1772 | 2A | 38844 | IWB38844 | Ku_c23118_149                | 15.6 |
| 1773 | 2A | 29812 | IWB29812 | Excalibur_rep_c102244_1103   | 17.6 |
| 1774 | 2A | 1996  | IWB1996  | BobWhite_c26374_339          | 20.1 |
| 1775 | 2A | 40060 | IWB40060 | Ku_c8180_291                 | 26.0 |
| 1776 | 2A | 10811 | IWB10811 | BS00075524_51                | 26.9 |
| 1777 | 2A | 25267 | IWB25267 | Excalibur_c32875_78          | 26.9 |

|      |    |       |          |                             |      |
|------|----|-------|----------|-----------------------------|------|
| 1778 | 2A | 67791 | IWB67791 | Tdurum_contig12952_263      | 26.9 |
| 1779 | 2A | 40186 | IWB40186 | Ku_c972_560                 | 26.9 |
| 1780 | 2A | 41737 | IWB41737 | Kukri_c1728_1876            | 28.3 |
| 1781 | 2A | 1222  | IWB1222  | BobWhite_c18852_91          | 28.5 |
| 1782 | 2A | 26983 | IWB26983 | Excalibur_c4876_1380        | 28.5 |
| 1783 | 2A | 80070 | IWA6478  | wsnp_Ku_c1292_2572110       | 28.5 |
| 1784 | 2A | 80069 | IWA6477  | wsnp_Ku_c1292_2572053       | 28.5 |
| 1785 | 2A | 8363  | IWB8363  | BS00044274_51               | 28.8 |
| 1786 | 2A | 77856 | IWA3520  | wsnp_Ex_c35331_43499339     | 29.1 |
| 1787 | 2A | 65812 | IWB65812 | TA004293-0913               | 29.1 |
| 1788 | 2A | 72862 | IWB72862 | Tdurum_contig62138_290      | 29.1 |
| 1789 | 2A | 6858  | IWB6858  | BS00022013_51               | 29.1 |
| 1790 | 2A | 11734 | IWB11734 | BS00091830_51               | 29.1 |
| 1791 | 2A | 5782  | IWB5782  | BS00001107_51               | 34.6 |
| 1792 | 2A | 77259 | IWA2730  | wsnp_Ex_c22645_31845530     | 37.5 |
| 1793 | 2A | 54584 | IWB54584 | RAC875_c17991_874           | 37.5 |
| 1794 | 2A | 12494 | IWB12494 | BS00110218_51               | 37.5 |
| 1795 | 2A | 71778 | IWB71778 | Tdurum_contig47258_1039     | 37.5 |
| 1796 | 2A | 80136 | IWA6566  | wsnp_Ku_c15567_24224486     | 37.5 |
| 1797 | 2A | 81474 | IWA8424  | wsnp_RFL_Contig3085_3007861 | 37.5 |
| 1798 | 2A | 77260 | IWA2731  | wsnp_Ex_c22645_31845564     | 37.5 |
| 1799 | 2A | 76764 | IWA2067  | wsnp_Ex_c15822_24204224     | 37.5 |
| 1800 | 2A | 11289 | IWB11289 | BS00083146_51               | 37.5 |
| 1801 | 2A | 63547 | IWB63547 | RFL_Contig1049_1473         | 37.5 |
| 1802 | 2A | 872   | IWB872   | BobWhite_c1611_1685         | 37.5 |
| 1803 | 2A | 73849 | IWB73849 | Tdurum_contig93115_517      | 40.0 |
| 1804 | 2A | 72481 | IWB72481 | Tdurum_contig560_297        | 44.7 |
| 1805 | 2A | 77593 | IWA3194  | wsnp_Ex_c2887_5330787       | 44.7 |
| 1806 | 2A | 79691 | IWA5893  | wsnp_JD_c18695_17091254     | 44.7 |
| 1807 | 2A | 72480 | IWB72480 | Tdurum_contig560_239        | 44.7 |
| 1808 | 2A | 50267 | IWB50267 | Kukri_rep_c73477_888        | 44.7 |
| 1809 | 2A | 77592 | IWA3193  | wsnp_Ex_c2887_5330426       | 44.7 |
| 1810 | 2A | 71526 | IWB71526 | Tdurum_contig44400_1610     | 45.3 |
| 1811 | 2A | 8064  | IWB8064  | BS00036766_51               | 45.3 |
| 1812 | 2A | 25847 | IWB25847 | Excalibur_c37649_125        | 45.3 |
| 1813 | 2A | 45777 | IWB45777 | Kukri_c47534_1509           | 45.3 |
| 1814 | 2A | 55048 | IWB55048 | RAC875_c20700_853           | 45.3 |
| 1815 | 2A | 71879 | IWB71879 | Tdurum_contig48302_532      | 45.3 |
| 1816 | 2A | 8160  | IWB8160  | BS00039209_51               | 45.3 |
| 1817 | 2A | 72304 | IWB72304 | Tdurum_contig5311_67        | 45.3 |
| 1818 | 2A | 9926  | IWB9926  | BS00066978_51               | 45.3 |
| 1819 | 2A | 71880 | IWB71880 | Tdurum_contig48302_539      | 45.3 |
| 1820 | 2A | 53662 | IWB53662 | RAC875_c13116_541           | 45.3 |
| 1821 | 2A | 30556 | IWB30556 | Excalibur_rep_c111743_194   | 45.3 |
| 1822 | 2A | 65942 | IWB65942 | TA005222-0574               | 45.3 |
| 1823 | 2A | 32426 | IWB32426 | GENE-1365_255               | 45.3 |
| 1824 | 2A | 22683 | IWB22683 | Excalibur_c15733_252        | 45.3 |
| 1825 | 2A | 73597 | IWB73597 | Tdurum_contig82812_213      | 45.3 |
| 1826 | 2A | 56082 | IWB56082 | RAC875_c27556_226           | 45.3 |
| 1827 | 2A | 25061 | IWB25061 | Excalibur_c3108_5476        | 45.3 |
| 1828 | 2A | 73981 | IWB73981 | Tdurum_contig9731_121       | 45.3 |
| 1829 | 2A | 72303 | IWB72303 | Tdurum_contig5311_112       | 45.3 |
| 1830 | 2A | 53660 | IWB53660 | RAC875_c13116_116           | 45.3 |
| 1831 | 2A | 35722 | IWB35722 | IACX1216                    | 45.6 |

|      |    |       |          |                              |      |
|------|----|-------|----------|------------------------------|------|
| 1832 | 2A | 44985 | IWB44985 | Kukri_c40035_258             | 46.1 |
| 1833 | 2A | 79630 | IWA5793  | wsnp_JD_c12088_12411845      | 46.1 |
| 1834 | 2A | 75537 | IWA294   | wsnp_BE497494A_Td_2_2        | 46.1 |
| 1835 | 2A | 75536 | IWA293   | wsnp_BE497494A_Td_2_1        | 46.1 |
| 1836 | 2A | 75992 | IWA991   | wsnp_CAP12_c901_472535       | 46.1 |
| 1837 | 2A | 73758 | IWB73758 | Tdurum_contig9070_142        | 46.1 |
| 1838 | 2A | 75952 | IWA901   | wsnp_CAP11_rep_c8768_3788007 | 46.1 |
| 1839 | 2A | 55668 | IWB55668 | RAC875_c24517_558            | 46.4 |
| 1840 | 2A | 39403 | IWB39403 | Ku_c41973_211                | 46.4 |
| 1841 | 2A | 43042 | IWB43042 | Kukri_c24852_466             | 46.4 |
| 1842 | 2A | 6749  | IWB6749  | BS00021739_51                | 46.9 |
| 1843 | 2A | 39193 | IWB39193 | Ku_c33021_109                | 46.9 |
| 1844 | 2A | 27211 | IWB27211 | Excalibur_c5121_930          | 46.9 |
| 1845 | 2A | 27013 | IWB27013 | Excalibur_c48978_98          | 46.9 |
| 1846 | 2A | 11079 | IWB11079 | BS00079443_51                | 46.9 |
| 1847 | 2A | 62989 | IWB62989 | RAC875_rep_c73925_276        | 46.9 |
| 1848 | 2A | 57603 | IWB57603 | RAC875_c40298_394            | 46.9 |
| 1849 | 2A | 32412 | IWB32412 | GENE-1353_136                | 46.9 |
| 1850 | 2A | 32411 | IWB32411 | GENE-1353_120                | 46.9 |
| 1851 | 2A | 28491 | IWB28491 | Excalibur_c6808_959          | 46.9 |
| 1852 | 2A | 35834 | IWB35834 | IACX2067                     | 46.9 |
| 1853 | 2A | 62779 | IWB62779 | RAC875_rep_c71350_1712       | 46.9 |
| 1854 | 2A | 22047 | IWB22047 | Excalibur_c12169_1088        | 46.9 |
| 1855 | 2A | 28719 | IWB28719 | Excalibur_c7444_391          | 46.9 |
| 1856 | 2A | 66114 | IWB66114 | TA013564-0487                | 47.5 |
| 1857 | 2A | 78073 | IWA3803  | wsnp_Ex_c41913_48628389      | 47.5 |
| 1858 | 2A | 653   | IWB653   | BobWhite_c14476_80           | 47.5 |
| 1859 | 2A | 21266 | IWB21266 | Ex_c721_2374                 | 47.5 |
| 1860 | 2A | 77116 | IWA2531  | wsnp_Ex_c20370_29434410      | 47.5 |
| 1861 | 2A | 21265 | IWB21265 | Ex_c721_2127                 | 47.5 |
| 1862 | 2A | 51634 | IWB51634 | Ra_c2655_504                 | 47.5 |
| 1863 | 2A | 78252 | IWA4026  | wsnp_Ex_c4847_8646583        | 47.5 |
| 1864 | 2A | 45503 | IWB45503 | Kukri_c45015_363             | 48.9 |
| 1865 | 2A | 10343 | IWB10343 | BS00068550_51                | 48.9 |
| 1866 | 2A | 5320  | IWB5320  | BobWhite_rep_c62964_459      | 48.9 |
| 1867 | 2A | 27207 | IWB27207 | Excalibur_c51133_246         | 48.9 |
| 1868 | 2A | 76386 | IWA1597  | wsnp_Ex_c12219_19526749      | 48.9 |
| 1869 | 2A | 79042 | IWA5037  | wsnp_Ex_rep_c101866_87158671 | 48.9 |
| 1870 | 2A | 80985 | IWA7705  | wsnp_Ra_c19526_28719561      | 48.9 |
| 1871 | 2A | 78550 | IWA4410  | wsnp_Ex_c60588_60977198      | 48.9 |
| 1872 | 2A | 76915 | IWA2259  | wsnp_Ex_c1782_3365844        | 48.9 |
| 1873 | 2A | 79472 | IWA5585  | wsnp_Ex_rep_c69124_68035485  | 48.9 |
| 1874 | 2A | 79850 | IWA6139  | wsnp_JD_c6436_7600132        | 48.9 |
| 1875 | 2A | 8253  | IWB8253  | BS00040959_51                | 48.9 |
| 1876 | 2A | 79473 | IWA5586  | wsnp_Ex_rep_c69124_68035904  | 48.9 |
| 1877 | 2A | 65638 | IWB65638 | TA003045-1227                | 48.9 |
| 1878 | 2A | 45502 | IWB45502 | Kukri_c45015_145             | 48.9 |
| 1879 | 2A | 21864 | IWB21864 | Excalibur_c11398_913         | 48.9 |
| 1880 | 2A | 80755 | IWA7389  | wsnp_Ku_rep_c102140_89178676 | 48.9 |
| 1881 | 2A | 79986 | IWA6369  | wsnp_JG_c926_520103          | 48.9 |
| 1882 | 2A | 45501 | IWB45501 | Kukri_c44997_377             | 48.9 |
| 1883 | 2A | 5321  | IWB5321  | BobWhite_rep_c62964_873      | 48.9 |
| 1884 | 2A | 80648 | IWA7248  | wsnp_Ku_c6826_11860405       | 48.9 |
| 1885 | 2A | 65777 | IWB65777 | TA004055-0626                | 48.9 |

|      |    |       |          |                             |      |
|------|----|-------|----------|-----------------------------|------|
| 1886 | 2A | 27915 | IWB27915 | Excalibur_c59901_433        | 49.1 |
| 1887 | 2A | 15774 | IWB15774 | D_contig15270_478           | 49.1 |
| 1888 | 2A | 45406 | IWB45406 | Kukri_c441_891              | 49.1 |
| 1889 | 2A | 27678 | IWB27678 | Excalibur_c56792_131        | 49.1 |
| 1890 | 2A | 75994 | IWA994   | wsnp_CAP12_c948_496702      | 49.1 |
| 1891 | 2A | 65456 | IWB65456 | TA001792-1026               | 49.1 |
| 1892 | 2A | 45445 | IWB45445 | Kukri_c44442_274            | 49.1 |
| 1893 | 2A | 49366 | IWB49366 | Kukri_rep_c108875_85        | 49.1 |
| 1894 | 2A | 71756 | IWB71756 | Tdurum_contig47103_94       | 49.1 |
| 1895 | 2A | 47516 | IWB47516 | Kukri_c7169_105             | 49.1 |
| 1896 | 2A | 48967 | IWB48967 | Kukri_rep_c104256_475       | 49.4 |
| 1897 | 2A | 79321 | IWA5378  | wsnp_Ex_rep_c67264_65795361 | 50.3 |
| 1898 | 2A | 9267  | IWB9267  | BS00064392_51               | 50.3 |
| 1899 | 2A | 27083 | IWB27083 | Excalibur_c4978_605         | 52.0 |
| 1900 | 2A | 71845 | IWB71845 | Tdurum_contig4781_1198      | 52.0 |
| 1901 | 2A | 72132 | IWB72132 | Tdurum_contig5094_505       | 52.0 |
| 1902 | 2A | 72639 | IWB72639 | Tdurum_contig59369_133      | 52.0 |
| 1903 | 2A | 54724 | IWB54724 | RAC875_c18698_550           | 52.0 |
| 1904 | 2A | 21883 | IWB21883 | Excalibur_c11437_75         | 52.0 |
| 1905 | 2A | 41389 | IWB41389 | Kukri_c15489_626            | 52.5 |
| 1906 | 2A | 72898 | IWB72898 | Tdurum_contig62559_146      | 52.5 |
| 1907 | 2A | 77741 | IWA3368  | wsnp_Ex_c31900_40635609     | 52.5 |
| 1908 | 2A | 41380 | IWB41380 | Kukri_c15427_119            | 52.5 |
| 1909 | 2A | 68111 | IWB68111 | Tdurum_contig13957_866      | 55.5 |
| 1910 | 2A | 13965 | IWB13965 | CAP7_c2791_231              | 56.1 |
| 1911 | 2A | 72123 | IWB72123 | Tdurum_contig50824_58       | 56.4 |
| 1912 | 2A | 59607 | IWB59607 | RAC875_c6156_428            | 56.4 |
| 1913 | 2A | 7015  | IWB7015  | BS00022301_51               | 57.5 |
| 1914 | 2A | 46634 | IWB46634 | Kukri_c57078_153            | 58.6 |
| 1915 | 2A | 70024 | IWB70024 | Tdurum_contig30451_88       | 58.6 |
| 1916 | 2A | 35417 | IWB35417 | IAAV80                      | 58.6 |
| 1917 | 2A | 71282 | IWB71282 | Tdurum_contig42540_843      | 62.5 |
| 1918 | 2A | 1087  | IWB1087  | BobWhite_c17739_82          | 63.4 |
| 1919 | 2A | 72154 | IWB72154 | Tdurum_contig5114_319       | 70.9 |
| 1920 | 2A | 64479 | IWB64479 | RFL_Contig3780_644          | 74.7 |
| 1921 | 2A | 11139 | IWB11139 | BS00080654_51               | 74.7 |
| 1922 | 2A | 35280 | IWB35280 | IAAV6972                    | 74.7 |
| 1923 | 2A | 31019 | IWB31019 | Excalibur_rep_c69014_112    | 74.7 |
| 1924 | 2A | 79376 | IWA5449  | wsnp_Ex_rep_c67751_66428606 | 74.7 |
| 1925 | 2A | 57080 | IWB57080 | RAC875_c35521_185           | 74.7 |
| 1926 | 2A | 8169  | IWB8169  | BS00039406_51               | 74.7 |
| 1927 | 2A | 36142 | IWB36142 | IACX6337                    | 74.7 |
| 1928 | 2A | 11175 | IWB11175 | BS00081194_51               | 74.7 |
| 1929 | 2A | 79517 | IWA5640  | wsnp_Ex_rep_c69799_68761171 | 74.7 |
| 1930 | 2A | 62635 | IWB62635 | RAC875_rep_c69987_930       | 74.7 |
| 1931 | 2A | 53686 | IWB53686 | RAC875_c13247_1032          | 74.7 |
| 1932 | 2A | 25538 | IWB25538 | Excalibur_c34964_326        | 74.7 |
| 1933 | 2A | 10432 | IWB10432 | BS00070005_51               | 74.7 |
| 1934 | 2A | 79465 | IWA5574  | wsnp_Ex_rep_c69014_67914888 | 74.7 |
| 1935 | 2A | 77598 | IWA3199  | wsnp_Ex_c28942_38018762     | 74.7 |
| 1936 | 2A | 51049 | IWB51049 | Ra_c13247_528               | 74.7 |
| 1937 | 2A | 43378 | IWB43378 | Kukri_c27100_823            | 74.7 |
| 1938 | 2A | 32663 | IWB32663 | GENE-1792_560               | 74.7 |
| 1939 | 2A | 12571 | IWB12571 | BS00110587_51               | 74.7 |

|      |    |       |          |                              |      |
|------|----|-------|----------|------------------------------|------|
| 1940 | 2A | 12570 | IWB12570 | BS00110586_51                | 74.7 |
| 1941 | 2A | 10431 | IWB10431 | BS00070004_51                | 74.7 |
| 1942 | 2A | 78538 | IWA4396  | wsnp_Ex_c5984_10493714       | 74.7 |
| 1943 | 2A | 32664 | IWB32664 | GENE-1792_762                | 74.7 |
| 1944 | 2A | 7051  | IWB7051  | BS00022377_51                | 74.7 |
| 1945 | 2A | 20877 | IWB20877 | Ex_c5280_1429                | 75.0 |
| 1946 | 2A | 11614 | IWB11614 | BS00089497_51                | 83.8 |
| 1947 | 2A | 75472 | IWA200   | wsnp_be471201A_Ta_1_1        | 83.8 |
| 1948 | 2A | 79066 | IWA5064  | wsnp_Ex_rep_c102385_87568304 | 83.8 |
| 1949 | 2A | 47525 | IWB47525 | Kukri_c7193_3176             | 83.8 |
| 1950 | 2A | 76784 | IWA2092  | wsnp_Ex_c1604_3060855        | 83.8 |
| 1951 | 2A | 81441 | IWA8377  | wsnp_RFL_Contig2729_2446041  | 83.8 |
| 1952 | 2A | 22730 | IWB22730 | Excalibur_c1604_2710         | 83.8 |
| 1953 | 2A | 46979 | IWB46979 | Kukri_c62142_683             | 83.8 |
| 1954 | 2A | 81574 | IWA8606  | wsnp_RFL_Contig4594_5459508  | 83.8 |
| 1955 | 2A | 13648 | IWB13648 | CAP12_rep_c6956_169          | 83.8 |
| 1956 | 2A | 5745  | IWB5745  | BS00000297_51                | 84.9 |
| 1957 | 2A | 64643 | IWB64643 | RFL_Contig4324_1348          | 87.1 |
| 1958 | 2A | 22458 | IWB22458 | Excalibur_c14536_1129        | 87.1 |
| 1959 | 2A | 29791 | IWB29791 | Excalibur_rep_c102052_721    | 87.1 |
| 1960 | 2A | 79680 | IWA5878  | wsnp_JD_c169_270144          | 88.2 |
| 1961 | 2A | 28642 | IWB28642 | Excalibur_c7282_482          | 88.5 |
| 1962 | 2A | 29311 | IWB29311 | Excalibur_c907_1643          | 88.5 |
| 1963 | 2A | 38412 | IWB38412 | Ku_c13700_1196               | 88.5 |
| 1964 | 2A | 62504 | IWB62504 | RAC875_rep_c119619_54        | 88.5 |
| 1965 | 2A | 80904 | IWA7593  | wsnp_Ra_c12874_20497763      | 88.5 |
| 1966 | 2A | 1411  | IWB1411  | BobWhite_c2058_367           | 88.5 |
| 1967 | 2A | 5778  | IWB5778  | BS00001059_51                | 88.5 |
| 1968 | 2A | 22408 | IWB22408 | Excalibur_c14317_401         | 88.5 |
| 1969 | 2A | 38411 | IWB38411 | Ku_c13700_1189               | 88.5 |
| 1970 | 2A | 52510 | IWB52510 | Ra_c70418_142                | 88.5 |
| 1971 | 2A | 52511 | IWB52511 | Ra_c70418_147                | 88.5 |
| 1972 | 2A | 65374 | IWB65374 | TA001297-0826                | 88.5 |
| 1973 | 2A | 79388 | IWA5463  | wsnp_Ex_rep_c67848_66550974  | 88.5 |
| 1974 | 2A | 5499  | IWB5499  | BobWhite_rep_c64766_352      | 88.5 |
| 1975 | 2A | 39857 | IWB39857 | Ku_c69608_894                | 88.5 |
| 1976 | 2A | 80868 | IWA7540  | wsnp_Ra_c10658_17500498      | 88.5 |
| 1977 | 2A | 51031 | IWB51031 | Ra_c12874_2478               | 88.5 |
| 1978 | 2A | 64616 | IWB64616 | RFL_Contig4214_1111          | 88.5 |
| 1979 | 2A | 28643 | IWB28643 | Excalibur_c7282_512          | 88.5 |
| 1980 | 2A | 75732 | IWA572   | wsnp_BG605368A_Ta_2_4        | 88.5 |
| 1981 | 2A | 7166  | IWB7166  | BS00022587_51                | 88.5 |
| 1982 | 2A | 26200 | IWB26200 | Excalibur_c41125_360         | 88.5 |
| 1983 | 2A | 14315 | IWB14315 | CAP7_c9218_89                | 88.5 |
| 1984 | 2A | 4615  | IWB4615  | BobWhite_c9505_515           | 88.5 |
| 1985 | 2A | 60477 | IWB60477 | RAC875_c77565_298            | 89.0 |
| 1986 | 2A | 29535 | IWB29535 | Excalibur_c96_670            | 89.0 |
| 1987 | 2A | 81100 | IWA7864  | wsnp_Ra_c32271_41304469      | 89.0 |
| 1988 | 2A | 78522 | IWA4375  | wsnp_Ex_c59095_60108185      | 89.0 |
| 1989 | 2A | 32895 | IWB32895 | GENE-2352_964                | 89.0 |
| 1990 | 2A | 47578 | IWB47578 | Kukri_c74165_204             | 89.0 |
| 1991 | 2A | 78520 | IWA4373  | wsnp_Ex_c59095_60108097      | 89.0 |
| 1992 | 2A | 36821 | IWB36821 | Jagger_c9554_114             | 89.0 |
| 1993 | 2A | 8088  | IWB8088  | BS00037160_51                | 89.3 |

|      |    |       |          |                              |       |
|------|----|-------|----------|------------------------------|-------|
| 1994 | 2A | 12522 | IWB12522 | BS00110386_51                | 89.3  |
| 1995 | 2A | 36583 | IWB36583 | Jagger_c4026_255             | 89.3  |
| 1996 | 2A | 36584 | IWB36584 | Jagger_c4026_328             | 89.3  |
| 1997 | 2A | 76839 | IWA2157  | wsnp_Ex_c16627_25162391      | 89.3  |
| 1998 | 2A | 11193 | IWB11193 | BS00081506_51                | 89.3  |
| 1999 | 2A | 67229 | IWB67229 | Tdurum_contig11678_289       | 90.2  |
| 2000 | 2A | 78186 | IWA3940  | wsnp_Ex_c45487_51267140      | 90.2  |
| 2001 | 2A | 81109 | IWA7876  | wsnp_Ra_c3378_6318431        | 90.4  |
| 2002 | 2A | 7395  | IWB7395  | BS00023048_51                | 104.1 |
| 2003 | 2A | 42586 | IWB42586 | Kukri_c22047_313             | 104.1 |
| 2004 | 2A | 62592 | IWB62592 | RAC875_rep_c69619_145        | 104.1 |
| 2005 | 2A | 62594 | IWB62594 | RAC875_rep_c69619_78         | 104.1 |
| 2006 | 2A | 78040 | IWA3752  | wsnp_Ex_c41007_47932833      | 104.1 |
| 2007 | 2A | 75818 | IWA684   | wsnp_CAP11_c1711_934478      | 104.1 |
| 2008 | 2A | 24443 | IWB24443 | Excalibur_c26462_452         | 104.1 |
| 2009 | 2A | 79067 | IWA5066  | wsnp_Ex_rep_c102390_87572532 | 104.3 |
| 2010 | 2A | 80408 | IWA6931  | wsnp_Ku_c33884_43306422      | 104.3 |
| 2011 | 2A | 53046 | IWB53046 | RAC875_c104160_61            | 105.5 |
| 2012 | 2A | 12391 | IWB12391 | BS00108865_51                | 105.5 |
| 2013 | 2A | 74851 | IWB74851 | tplb0046b02_872              | 105.5 |
| 2014 | 2A | 54915 | IWB54915 | RAC875_c19904_308            | 105.5 |
| 2015 | 2A | 73879 | IWB73879 | Tdurum_contig93508_295       | 108.3 |
| 2016 | 2A | 73878 | IWB73878 | Tdurum_contig93508_119       | 108.3 |
| 2017 | 2A | 71626 | IWB71626 | Tdurum_contig45661_684       | 108.3 |
| 2018 | 2A | 6997  | IWB6997  | BS00022265_51                | 108.3 |
| 2019 | 2A | 6414  | IWB6414  | BS00011478_51                | 108.3 |
| 2020 | 2A | 72722 | IWB72722 | Tdurum_contig60298_219       | 108.6 |
| 2021 | 2A | 31368 | IWB31368 | Excalibur_rep_c86807_132     | 108.6 |
| 2022 | 2A | 10957 | IWB10957 | BS00077769_51                | 108.6 |
| 2023 | 2A | 26296 | IWB26296 | Excalibur_c42110_210         | 108.6 |
| 2024 | 2A | 76750 | IWA2051  | wsnp_Ex_c15681_24015303      | 108.6 |
| 2025 | 2A | 44394 | IWB44394 | Kukri_c34983_190             | 108.6 |
| 2026 | 2A | 26297 | IWB26297 | Excalibur_c42110_66          | 108.6 |
| 2027 | 2A | 10956 | IWB10956 | BS00077768_51                | 108.6 |
| 2028 | 2A | 34772 | IWB34772 | IAAV3791                     | 108.6 |
| 2029 | 2A | 72718 | IWB72718 | Tdurum_contig60205_806       | 108.6 |
| 2030 | 2A | 78170 | IWA3919  | wsnp_Ex_c45_97816            | 108.6 |
| 2031 | 2A | 60040 | IWB60040 | RAC875_c66695_1376           | 108.6 |
| 2032 | 2A | 76993 | IWA2370  | wsnp_Ex_c19003_27913936      | 108.6 |
| 2033 | 2A | 51957 | IWB51957 | Ra_c3750_1082                | 108.6 |
| 2034 | 2A | 11146 | IWB11146 | BS00080760_51                | 108.6 |
| 2035 | 2A | 25799 | IWB25799 | Excalibur_c3727_1773         | 109.7 |
| 2036 | 2A | 73708 | IWB73708 | Tdurum_contig86183_221       | 109.7 |
| 2037 | 2A | 65315 | IWB65315 | RFL_Contig927_1591           | 110.8 |
| 2038 | 2A | 73568 | IWB73568 | Tdurum_contig82404_354       | 110.8 |
| 2039 | 2A | 5740  | IWB5740  | BS00000209_51                | 111.1 |
| 2040 | 2A | 73663 | IWB73663 | Tdurum_contig84245_154       | 111.1 |
| 2041 | 2A | 8907  | IWB8907  | BS00062732_51                | 111.9 |
| 2042 | 2A | 12554 | IWB12554 | BS00110516_51                | 111.9 |
| 2043 | 2A | 35910 | IWB35910 | IACX3245                     | 111.9 |
| 2044 | 2A | 58213 | IWB58213 | RAC875_c4609_1756            | 112.2 |
| 2045 | 2A | 3746  | IWB3746  | BobWhite_c5178_188           | 113.3 |
| 2046 | 2A | 7471  | IWB7471  | BS00023202_51                | 113.3 |
| 2047 | 2A | 34572 | IWB34572 | IAAV2576                     | 113.3 |

|      |    |       |          |                              |       |
|------|----|-------|----------|------------------------------|-------|
| 2048 | 2A | 61119 | IWB61119 | RAC875_c9523_328             | 113.3 |
| 2049 | 2A | 28627 | IWB28627 | Excalibur_c7241_284          | 113.3 |
| 2050 | 2A | 21523 | IWB21523 | Excalibur_c10068_1431        | 113.3 |
| 2051 | 2A | 3440  | IWB3440  | BobWhite_c4517_120           | 113.6 |
| 2052 | 2A | 836   | IWB836   | BobWhite_c15773_166          | 114.1 |
| 2053 | 2A | 28621 | IWB28621 | Excalibur_c72359_56          | 114.1 |
| 2054 | 2A | 35952 | IWB35952 | IACX4320                     | 114.9 |
| 2055 | 2A | 64018 | IWB64018 | RFL_Contig2656_871           | 114.9 |
| 2056 | 2A | 61146 | IWB61146 | RAC875_c96033_191            | 115.2 |
| 2057 | 2A | 72339 | IWB72339 | Tdurum_contig54056_501       | 117.2 |
| 2058 | 2A | 77166 | IWA2601  | wsnp_Ex_c2137_4014287        | 117.2 |
| 2059 | 2A | 13459 | IWB13459 | CAP12_c575_105               | 117.2 |
| 2060 | 2A | 35540 | IWB35540 | IAAV880                      | 117.2 |
| 2061 | 2A | 11978 | IWB11978 | BS00096927_51                | 117.2 |
| 2062 | 2A | 81223 | IWA8036  | wsnp_Ra_c6586_11477949       | 117.2 |
| 2063 | 2A | 77167 | IWA2602  | wsnp_Ex_c2137_4014383        | 117.2 |
| 2064 | 2A | 26001 | IWB26001 | Excalibur_c39151_104         | 118.7 |
| 2065 | 2A | 10540 | IWB10540 | BS00071350_51                | 118.7 |
| 2066 | 2A | 80485 | IWA7031  | wsnp_Ku_c4045_7380115        | 118.7 |
| 2067 | 2A | 55230 | IWB55230 | RAC875_c21750_784            | 118.7 |
| 2068 | 2A | 3216  | IWB3216  | BobWhite_c42181_327          | 118.7 |
| 2069 | 2A | 80303 | IWA6798  | wsnp_Ku_c26323_36285697      | 118.7 |
| 2070 | 2A | 26593 | IWB26593 | Excalibur_c44834_80          | 118.7 |
| 2071 | 2A | 9488  | IWB9488  | BS00065245_51                | 118.9 |
| 2072 | 2A | 67648 | IWB67648 | Tdurum_contig12556_183       | 118.9 |
| 2073 | 2A | 53050 | IWB53050 | RAC875_c1043_258             | 118.9 |
| 2074 | 2A | 72501 | IWB72501 | Tdurum_contig56321_232       | 118.9 |
| 2075 | 2A | 78917 | IWA4870  | wsnp_Ex_c905_1748920         | 118.9 |
| 2076 | 2A | 22893 | IWB22893 | Excalibur_c17000_557         | 118.9 |
| 2077 | 2A | 67649 | IWB67649 | Tdurum_contig12556_431       | 118.9 |
| 2078 | 2A | 72117 | IWB72117 | Tdurum_contig50755_97        | 118.9 |
| 2079 | 2A | 36916 | IWB36916 | JD_c11825_1135               | 118.9 |
| 2080 | 2A | 25211 | IWB25211 | Excalibur_c32514_247         | 118.9 |
| 2081 | 2A | 4353  | IWB4353  | BobWhite_c7551_418           | 118.9 |
| 2082 | 2A | 61340 | IWB61340 | RAC875_rep_c102485_606       | 118.9 |
| 2083 | 2A | 72116 | IWB72116 | Tdurum_contig50755_190       | 118.9 |
| 2084 | 2A | 29338 | IWB29338 | Excalibur_c91176_326         | 118.9 |
| 2085 | 2A | 61157 | IWB61157 | RAC875_c96399_610            | 118.9 |
| 2086 | 2A | 73638 | IWB73638 | Tdurum_contig8350_350        | 120.6 |
| 2087 | 2A | 14668 | IWB14668 | CAP8_c3129_381               | 120.9 |
| 2088 | 2A | 32878 | IWB32878 | GENE-2324_85                 | 121.2 |
| 2089 | 2A | 46343 | IWB46343 | Kukri_c53501_305             | 121.7 |
| 2090 | 2A | 35077 | IWB35077 | IAAV5706                     | 124.3 |
| 2091 | 2A | 32084 | IWB32084 | GENE-0762_808                | 124.3 |
| 2092 | 2A | 79145 | IWA5161  | wsnp_Ex_rep_c108004_91402649 | 124.3 |
| 2093 | 2A | 11730 | IWB11730 | BS00091763_51                | 124.3 |
| 2094 | 2A | 51274 | IWB51274 | Ra_c1757_256                 | 124.3 |
| 2095 | 2A | 36516 | IWB36516 | Jagger_c295_58               | 124.3 |
| 2096 | 2A | 6580  | IWB6580  | BS00012942_51                | 124.3 |
| 2097 | 2A | 56270 | IWB56270 | RAC875_c29056_299            | 124.3 |
| 2098 | 2A | 60386 | IWB60386 | RAC875_c75800_331            | 124.3 |
| 2099 | 2A | 6084  | IWB6084  | BS00009594_51                | 124.3 |
| 2100 | 2B | 315   | IWB315   | BobWhite_c12144_216          | 0.0   |
| 2101 | 2B | 12070 | IWB12070 | BS00099469_51                | 0.0   |

|      |    |       |          |                             |      |
|------|----|-------|----------|-----------------------------|------|
| 2102 | 2B | 46236 | IWB46236 | Kukri_c52263_281            | 0.0  |
| 2103 | 2B | 65686 | IWB65686 | TA003428-0332               | 0.0  |
| 2104 | 2B | 66351 | IWB66351 | Tdurum_contig10208_447      | 0.0  |
| 2105 | 2B | 66352 | IWB66352 | Tdurum_contig10208_452      | 0.0  |
| 2106 | 2B | 991   | IWB991   | BobWhite_c17047_268         | 0.0  |
| 2107 | 2B | 9321  | IWB9321  | BS00064570_51               | 0.0  |
| 2108 | 2B | 54334 | IWB54334 | RAC875_c16656_406           | 0.0  |
| 2109 | 2B | 35447 | IWB35447 | IAAV8205                    | 0.0  |
| 2110 | 2B | 217   | IWB217   | BobWhite_c11397_231         | 0.0  |
| 2111 | 2B | 44633 | IWB44633 | Kukri_c3701_392             | 0.3  |
| 2112 | 2B | 8416  | IWB8416  | BS00046019_51               | 3.5  |
| 2113 | 2B | 50555 | IWB50555 | Kukri_rep_c97239_133        | 5.5  |
| 2114 | 2B | 26054 | IWB26054 | Excalibur_c39493_251        | 5.5  |
| 2115 | 2B | 7669  | IWB7669  | BS00028028_51               | 5.5  |
| 2116 | 2B | 30293 | IWB30293 | Excalibur_rep_c107769_116   | 6.1  |
| 2117 | 2B | 62175 | IWB62175 | RAC875_rep_c112807_403      | 6.1  |
| 2118 | 2B | 21634 | IWB21634 | Excalibur_c10406_1949       | 6.1  |
| 2119 | 2B | 53547 | IWB53547 | RAC875_c12533_2006          | 6.1  |
| 2120 | 2B | 32317 | IWB32317 | GENE-1230_436               | 6.1  |
| 2121 | 2B | 1326  | IWB1326  | BobWhite_c19945_341         | 8.6  |
| 2122 | 2B | 24938 | IWB24938 | Excalibur_c30167_243        | 8.9  |
| 2123 | 2B | 11442 | IWB11442 | BS00086109_51               | 8.9  |
| 2124 | 2B | 71519 | IWB71519 | Tdurum_contig44328_68       | 8.9  |
| 2125 | 2B | 81154 | IWA7936  | wsnp_Ra_c4321_7860456       | 13.7 |
| 2126 | 2B | 39756 | IWB39756 | Ku_c63748_1264              | 14.0 |
| 2127 | 2B | 5813  | IWB5813  | BS00002660_51               | 14.0 |
| 2128 | 2B | 8390  | IWB8390  | BS00045163_51               | 14.0 |
| 2129 | 2B | 43883 | IWB43883 | Kukri_c3067_398             | 14.3 |
| 2130 | 2B | 6356  | IWB6356  | BS00011149_51               | 14.3 |
| 2131 | 2B | 9206  | IWB9206  | BS00064153_51               | 14.3 |
| 2132 | 2B | 4667  | IWB4667  | BobWhite_c9843_117          | 14.3 |
| 2133 | 2B | 76925 | IWA2274  | wsnp_Ex_c1792_3381384       | 18.5 |
| 2134 | 2B | 45990 | IWB45990 | Kukri_c4949_201             | 18.5 |
| 2135 | 2B | 79452 | IWA5555  | wsnp_Ex_rep_c68623_67474935 | 18.5 |
| 2136 | 2B | 32593 | IWB32593 | GENE-1676_57                | 18.5 |
| 2137 | 2B | 12154 | IWB12154 | BS00100939_51               | 18.5 |
| 2138 | 2B | 76795 | IWA2104  | wsnp_Ex_c16144_24583060     | 18.5 |
| 2139 | 2B | 76926 | IWA2275  | wsnp_Ex_c1792_3381544       | 18.5 |
| 2140 | 2B | 69976 | IWB69976 | Tdurum_contig30210_226      | 18.5 |
| 2141 | 2B | 80545 | IWA7106  | wsnp_Ku_c48_103915          | 18.5 |
| 2142 | 2B | 26792 | IWB26792 | Excalibur_c46590_363        | 18.5 |
| 2143 | 2B | 47594 | IWB47594 | Kukri_c74521_181            | 18.5 |
| 2144 | 2B | 36011 | IWB36011 | IACX5750                    | 18.5 |
| 2145 | 2B | 22739 | IWB22739 | Excalibur_c16144_185        | 18.5 |
| 2146 | 2B | 12972 | IWB12972 | CAP11_c585_134              | 18.5 |
| 2147 | 2B | 26791 | IWB26791 | Excalibur_c46590_290        | 18.5 |
| 2148 | 2B | 48989 | IWB48989 | Kukri_rep_c104422_192       | 18.5 |
| 2149 | 2B |       | wmc154   |                             | 22.4 |
| 2150 | 2B | 11823 | IWB11823 | BS00093755_51               | 29.9 |
| 2151 | 2B | 76806 | IWA2115  | wsnp_Ex_c163_320267         | 29.9 |
| 2152 | 2B | 76807 | IWA2116  | wsnp_Ex_c163_320858         | 29.9 |
| 2153 | 2B | 76808 | IWA2117  | wsnp_Ex_c163_321026         | 29.9 |
| 2154 | 2B | 63153 | IWB63153 | RAC875_rep_c79427_59        | 29.9 |
| 2155 | 2B | 57906 | IWB57906 | RAC875_c4314_993            | 34.7 |



|      |    |       |          |                           |      |
|------|----|-------|----------|---------------------------|------|
| 2156 | 2B | 29273 | IWB29273 | Excalibur_c89477_207      | 34.7 |
| 2157 | 2B | 23278 | IWB23278 | Excalibur_c19260_105      | 34.7 |
| 2158 | 2B | 75619 | IWA413   | wsnp_BF146221B_Ta_2_2     | 34.7 |
| 2159 | 2B | 46469 | IWB46469 | Kukri_c5497_312           | 38.0 |
| 2160 | 2B | 73253 | IWB73253 | Tdurum_contig7495_1029    | 38.0 |
| 2161 | 2B | 37705 | IWB37705 | JD_c6368_651              | 38.0 |
| 2162 | 2B | 75713 | IWA546   | wsnp_BG275030A_Td_2_1     | 38.0 |
| 2163 | 2B | 72380 | IWB72380 | Tdurum_contig54704_176    | 38.0 |
| 2164 | 2B | 44373 | IWB44373 | Kukri_c34861_523          | 38.0 |
| 2165 | 2B | 77148 | IWA2572  | wsnp_Ex_c21092_30220702   | 38.0 |
| 2166 | 2B | 77147 | IWA2571  | wsnp_Ex_c21092_30220342   | 38.0 |
| 2167 | 2B | 61862 | IWB61862 | RAC875_rep_c109207_706    | 38.9 |
| 2168 | 2B | 24280 | IWB24280 | Excalibur_c25234_143      | 38.9 |
| 2169 | 2B | 54881 | IWB54881 | RAC875_c19690_358         | 39.2 |
| 2170 | 2B | 51371 | IWB51371 | Ra_c19690_1998            | 39.2 |
| 2171 | 2B | 28342 | IWB28342 | Excalibur_c6502_397       | 39.5 |
| 2172 | 2B | 2427  | IWB2427  | BobWhite_c31129_60        | 39.5 |
| 2173 | 2B | 70087 | IWB70087 | Tdurum_contig30680_120    | 39.5 |
| 2174 | 2B | 69396 | IWB69396 | Tdurum_contig27976_414    | 39.5 |
| 2175 | 2B | 82    | IWB82    | BobWhite_c10578_272       | 39.5 |
| 2176 | 2B | 71313 | IWB71313 | Tdurum_contig42636_1245   | 39.5 |
| 2177 | 2B | 11952 | IWB11952 | BS00096182_51             | 39.5 |
| 2178 | 2B | 25663 | IWB25663 | Excalibur_c36070_300      | 39.5 |
| 2179 | 2B | 39654 | IWB39654 | Ku_c5725_892              | 39.5 |
| 2180 | 2B | 32008 | IWB32008 | GENE-0647_106             | 39.5 |
| 2181 | 2B | 56961 | IWB56961 | RAC875_c34516_316         | 39.5 |
| 2182 | 2B | 6159  | IWB6159  | BS00010055_51             | 39.5 |
| 2183 | 2B | 73904 | IWB73904 | Tdurum_contig94176_65     | 39.5 |
| 2184 | 2B | 78741 | IWA4652  | wsnp_Ex_c7285_12506938    | 39.5 |
| 2185 | 2B | 21742 | IWB21742 | Excalibur_c108170_294     | 39.5 |
| 2186 | 2B | 43156 | IWB43156 | Kukri_c2565_1405          | 39.5 |
| 2187 | 2B | 46810 | IWB46810 | Kukri_c59585_560          | 39.5 |
| 2188 | 2B | 72086 | IWB72086 | Tdurum_contig5056_173     | 39.5 |
| 2189 | 2B | 48595 | IWB48595 | Kukri_rep_c101093_572     | 39.5 |
| 2190 | 2B | 78558 | IWA4420  | wsnp_Ex_c6099_10674406    | 39.5 |
| 2191 | 2B | 81260 | IWA8083  | wsnp_Ra_c8489_14382125    | 39.5 |
| 2192 | 2B | 55384 | IWB55384 | RAC875_c22619_364         | 39.5 |
| 2193 | 2B | 36310 | IWB36310 | IACX8565                  | 39.5 |
| 2194 | 2B | 61142 | IWB61142 | RAC875_c95948_614         | 39.5 |
| 2195 | 2B | 7072  | IWB7072  | BS00022422_51             | 41.6 |
| 2196 | 2B | 10022 | IWB10022 | BS00067333_51             | 41.6 |
| 2197 | 2B | 63381 | IWB63381 | RAC875_rep_c99492_65      | 41.6 |
| 2198 | 2B | 54339 | IWB54339 | RAC875_c16675_580         | 41.6 |
| 2199 | 2B | 45731 | IWB45731 | Kukri_c4710_991           | 41.6 |
| 2200 | 2B | 36919 | IWB36919 | JD_c11869_1297            | 41.9 |
| 2201 | 2B | 7481  | IWB7481  | BS00023221_51             | 41.9 |
| 2202 | 2B | 36550 | IWB36550 | Jagger_c36_213            | 41.9 |
| 2203 | 2B | 36124 | IWB36124 | IACX6223                  | 41.9 |
| 2204 | 2B | 71775 | IWB71775 | Tdurum_contig47202_1699   | 41.9 |
| 2205 | 2B | 7781  | IWB7781  | BS00030497_51             | 41.9 |
| 2206 | 2B | 31001 | IWB31001 | Excalibur_rep_c68899_1400 | 41.9 |
| 2207 | 2B | 44618 | IWB44618 | Kukri_c36879_83           | 41.9 |
| 2208 | 2B | 39832 | IWB39832 | Ku_c68678_924             | 41.9 |
| 2209 | 2B | 72760 | IWB72760 | Tdurum_contig60978_352    | 41.9 |

|      |    |       |          |                             |      |
|------|----|-------|----------|-----------------------------|------|
| 2210 | 2B | 31002 | IWB31002 | Excalibur_rep_c68899_191    | 41.9 |
| 2211 | 2B | 57346 | IWB57346 | RAC875_c37837_889           | 41.9 |
| 2212 | 2B | 34324 | IWB34324 | IAAV1101                    | 41.9 |
| 2213 | 2B | 71597 | IWB71597 | Tdurum_contig45350_605      | 41.9 |
| 2214 | 2B | 60831 | IWB60831 | RAC875_c86069_65            | 41.9 |
| 2215 | 2B | 72894 | IWB72894 | Tdurum_contig62458_179      | 41.9 |
| 2216 | 2B | 2380  | IWB2380  | BobWhite_c30622_180         | 41.9 |
| 2217 | 2B | 10024 | IWB10024 | BS00067337_51               | 42.2 |
| 2218 | 2B | 2338  | IWB2338  | BobWhite_c30112_275         | 42.5 |
| 2219 | 2B | 2818  | IWB2818  | BobWhite_c36072_272         | 42.5 |
| 2220 | 2B | 26450 | IWB26450 | Excalibur_c43482_196        | 42.5 |
| 2221 | 2B | 39513 | IWB39513 | Ku_c4790_797                | 42.5 |
| 2222 | 2B | 28282 | IWB28282 | Excalibur_c64276_565        | 42.5 |
| 2223 | 2B | 3116  | IWB3116  | BobWhite_c40418_289         | 42.5 |
| 2224 | 2B | 72685 | IWB72685 | Tdurum_contig59780_988      | 42.5 |
| 2225 | 2B | 8332  | IWB8332  | BS00043099_51               | 42.5 |
| 2226 | 2B | 8125  | IWB8125  | BS00038217_51               | 42.5 |
| 2227 | 2B | 72915 | IWB72915 | Tdurum_contig62852_538      | 42.5 |
| 2228 | 2B | 32327 | IWB32327 | GENE-1246_417               | 42.5 |
| 2229 | 2B | 79647 | IWA5818  | wsnp_JD_c12687_12877994     | 42.5 |
| 2230 | 2B | 40265 | IWB40265 | Kukri_c1016_1123            | 42.5 |
| 2231 | 2B | 30853 | IWB30853 | Excalibur_rep_c67391_476    | 42.5 |
| 2232 | 2B | 72916 | IWB72916 | Tdurum_contig62852_592      | 42.5 |
| 2233 | 2B | 24312 | IWB24312 | Excalibur_c25430_183        | 42.5 |
| 2234 | 2B | 22043 | IWB22043 | Excalibur_c12135_100        | 42.5 |
| 2235 | 2B | 70370 | IWB70370 | Tdurum_contig32621_437      | 42.5 |
| 2236 | 2B | 45998 | IWB45998 | Kukri_c49522_254            | 42.5 |
| 2237 | 2B | 73598 | IWB73598 | Tdurum_contig82821_324      | 42.5 |
| 2238 | 2B | 73495 | IWB73495 | Tdurum_contig81323_291      | 42.5 |
| 2239 | 2B | 70581 | IWB70581 | Tdurum_contig36804_98       | 42.5 |
| 2240 | 2B | 39862 | IWB39862 | Ku_c69635_2786              | 42.5 |
| 2241 | 2B | 26449 | IWB26449 | Excalibur_c43482_141        | 42.5 |
| 2242 | 2B | 24614 | IWB24614 | Excalibur_c27716_544        | 42.5 |
| 2243 | 2B | 56798 | IWB56798 | RAC875_c3302_1411           | 42.5 |
| 2244 | 2B | 45825 | IWB45825 | Kukri_c4790_923             | 42.5 |
| 2245 | 2B | 45822 | IWB45822 | Kukri_c4790_154             | 42.5 |
| 2246 | 2B | 47284 | IWB47284 | Kukri_c66123_88             | 42.5 |
| 2247 | 2B | 46777 | IWB46777 | Kukri_c5904_80              | 42.5 |
| 2248 | 2B | 22995 | IWB22995 | Excalibur_c17633_111        | 42.5 |
| 2249 | 2B | 12537 | IWB12537 | BS00110442_51               | 42.5 |
| 2250 | 2B | 12205 | IWB12205 | BS00103461_51               | 42.5 |
| 2251 | 2B | 41315 | IWB41315 | Kukri_c15043_326            | 42.5 |
| 2252 | 2B | 54201 | IWB54201 | RAC875_c16009_223           | 42.5 |
| 2253 | 2B | 47380 | IWB47380 | Kukri_c67276_76             | 42.5 |
| 2254 | 2B | 47379 | IWB47379 | Kukri_c67276_103            | 42.5 |
| 2255 | 2B | 12514 | IWB12514 | BS00110319_51               | 42.5 |
| 2256 | 2B | 78338 | IWA4135  | wsnp_Ex_c5239_9272511       | 42.5 |
| 2257 | 2B | 78756 | IWA4673  | wsnp_Ex_c741_1456698        | 42.5 |
| 2258 | 2B | 74841 | IWB74841 | tplb0045o20_1168            | 42.5 |
| 2259 | 2B | 64716 | IWB64716 | RFL_Contig4542_1281         | 42.5 |
| 2260 | 2B | 8126  | IWB8126  | BS00038218_51               | 42.5 |
| 2261 | 2B | 81444 | IWA8381  | wsnp_RFL_Contig2744_2471775 | 42.5 |
| 2262 | 2B | 74844 | IWB74844 | tplb0045o20_699             | 42.5 |
| 2263 | 2B | 73496 | IWB73496 | Tdurum_contig81323_527      | 42.5 |

|      |    |       |          |                              |      |
|------|----|-------|----------|------------------------------|------|
| 2264 | 2B | 63879 | IWB63879 | RFL_Contig2231_346           | 42.5 |
| 2265 | 2B | 58252 | IWB58252 | RAC875_c46454_129            | 42.5 |
| 2266 | 2B | 11072 | IWB11072 | BS00079213_51                | 42.5 |
| 2267 | 2B | 7738  | IWB7738  | BS00029713_51                | 42.5 |
| 2268 | 2B | 6075  | IWB6075  | BS00009540_51                | 42.5 |
| 2269 | 2B | 3877  | IWB3877  | BobWhite_c5511_323           | 42.5 |
| 2270 | 2B | 68550 | IWB68550 | Tdurum_contig1653_190        | 42.5 |
| 2271 | 2B | 60422 | IWB60422 | RAC875_c76533_442            | 42.5 |
| 2272 | 2B | 55924 | IWB55924 | RAC875_c26415_350            | 42.5 |
| 2273 | 2B | 50438 | IWB50438 | Kukri_rep_c85389_715         | 42.5 |
| 2274 | 2B | 5684  | IWB5684  | BobWhite_s65298_124          | 42.5 |
| 2275 | 2B | 45048 | IWB45048 | Kukri_c40637_223             | 42.8 |
| 2276 | 2B | 24241 | IWB24241 | Excalibur_c2496_1141         | 42.8 |
| 2277 | 2B | 57072 | IWB57072 | RAC875_c35438_474            | 42.8 |
| 2278 | 2B | 59095 | IWB59095 | RAC875_c55059_202            | 42.8 |
| 2279 | 2B | 6822  | IWB6822  | BS00021959_51                | 43.3 |
| 2280 | 2B | 26101 | IWB26101 | Excalibur_c40056_59          | 43.3 |
| 2281 | 2B | 48240 | IWB48240 | Kukri_c9102_84               | 43.3 |
| 2282 | 2B | 37019 | IWB37019 | JD_c14855_506                | 43.6 |
| 2283 | 2B | 36727 | IWB36727 | Jagger_c7206_101             | 43.6 |
| 2284 | 2B | 28372 | IWB28372 | Excalibur_c65450_1279        | 43.6 |
| 2285 | 2B | 32482 | IWB32482 | GENE-1430_599                | 43.6 |
| 2286 | 2B | 39369 | IWB39369 | Ku_c4042_1178                | 43.6 |
| 2287 | 2B | 39370 | IWB39370 | Ku_c4042_576                 | 43.6 |
| 2288 | 2B | 42880 | IWB42880 | Kukri_c2387_2011             | 43.6 |
| 2289 | 2B | 42993 | IWB42993 | Kukri_c24586_923             | 43.6 |
| 2290 | 2B | 49035 | IWB49035 | Kukri_rep_c104810_341        | 43.6 |
| 2291 | 2B | 75538 | IWA295   | wsnp_BE497494B_Ta_2_1        | 43.6 |
| 2292 | 2B | 10430 | IWB10430 | BS00070001_51                | 43.6 |
| 2293 | 2B | 32424 | IWB32424 | GENE-1365_16                 | 43.6 |
| 2294 | 2B | 45685 | IWB45685 | Kukri_c46621_143             | 43.6 |
| 2295 | 2B | 59396 | IWB59396 | RAC875_c58652_80             | 43.6 |
| 2296 | 2B | 77137 | IWA2557  | wsnp_Ex_c20786_29875033      | 43.6 |
| 2297 | 2B | 78638 | IWA4531  | wsnp_Ex_c6537_11338763       | 43.6 |
| 2298 | 2B | 81229 | IWA8046  | wsnp_Ra_c67199_65253620      | 43.6 |
| 2299 | 2B | 50839 | IWB50839 | Ra_c107358_279               | 43.6 |
| 2300 | 2B | 63700 | IWB63700 | RFL_Contig1633_304           | 43.6 |
| 2301 | 2B | 76061 | IWA1114  | wsnp_CAP7_rep_c12606_5316797 | 43.6 |
| 2302 | 2B | 78639 | IWA4532  | wsnp_Ex_c6537_11339130       | 43.6 |
| 2303 | 2B | 75872 | IWA762   | wsnp_CAP11_c3947_1866837     | 43.6 |
| 2304 | 2B | 32088 | IWB32088 | GENE-0767_62                 | 43.6 |
| 2305 | 2B | 80484 | IWA7030  | wsnp_Ku_c4042_7375890        | 43.6 |
| 2306 | 2B | 5826  | IWB5826  | BS00003404_51                | 43.6 |
| 2307 | 2B | 7111  | IWB7111  | BS00022486_51                | 43.6 |
| 2308 | 2B | 75873 | IWA763   | wsnp_CAP11_c3947_1867089     | 43.6 |
| 2309 | 2B | 53857 | IWB53857 | RAC875_c14076_287            | 43.6 |
| 2310 | 2B | 62688 | IWB62688 | RAC875_rep_c70402_527        | 43.6 |
| 2311 | 2B | 79456 | IWA5560  | wsnp_Ex_rep_c68704_67559626  | 43.6 |
| 2312 | 2B | 71005 | IWB71005 | Tdurum_contig42214_1195      | 43.6 |
| 2313 | 2B | 73426 | IWB73426 | Tdurum_contig77602_931       | 43.6 |
| 2314 | 2B | 77708 | IWA3329  | wsnp_Ex_c31274_40086873      | 43.6 |
| 2315 | 2B | 75763 | IWA607   | wsnp_BM140364B_Ta_2_1        | 43.6 |
| 2316 | 2B | 3002  | IWB3002  | BobWhite_c38833_197          | 43.6 |
| 2317 | 2B | 38875 | IWB38875 | Ku_c2387_1855                | 43.6 |

|      |    |       |          |                            |      |
|------|----|-------|----------|----------------------------|------|
| 2318 | 2B | 51809 | IWB51809 | Ra_c31463_148              | 43.6 |
| 2319 | 2B | 56915 | IWB56915 | RAC875_c34191_102          | 43.6 |
| 2320 | 2B | 58852 | IWB58852 | RAC875_c52566_447          | 43.6 |
| 2321 | 2B | 6607  | IWB6607  | BS00014923_51              | 43.6 |
| 2322 | 2B | 45644 | IWB45644 | Kukri_c4632_115            | 43.6 |
| 2323 | 2B | 78794 | IWA4720  | wsnp_Ex_c7738_13195349     | 43.6 |
| 2324 | 2B | 4951  | IWB4951  | BobWhite_rep_c51373_453    | 43.6 |
| 2325 | 2B | 35350 | IWB35350 | IAAV7487                   | 43.6 |
| 2326 | 2B | 79709 | IWA5916  | wsnp_JD_c20720_18369335    | 43.6 |
| 2327 | 2B | 46175 | IWB46175 | Kukri_c51619_265           | 43.6 |
| 2328 | 2B | 55177 | IWB55177 | RAC875_c21378_474          | 43.6 |
| 2329 | 2B | 77136 | IWA2556  | wsnp_Ex_c20786_29874875    | 43.6 |
| 2330 | 2B | 75764 | IWA608   | wsnp_BM140364B_Ta_2_3      | 43.6 |
| 2331 | 2B | 22744 | IWB22744 | Excalibur_c16154_246       | 43.6 |
| 2332 | 2B | 80483 | IWA7029  | wsnp_Ku_c4042_7375053      | 43.6 |
| 2333 | 2B | 77369 | IWA2887  | wsnp_Ex_c2430_4546479      | 43.6 |
| 2334 | 2B | 65460 | IWB65460 | TA001821-0411              | 43.6 |
| 2335 | 2B | 41111 | IWB41111 | Kukri_c13884_74            | 43.6 |
| 2336 | 2B | 36153 | IWB36153 | IACX6411                   | 43.9 |
| 2337 | 2B | 61973 | IWB61973 | RAC875_rep_c110493_512     | 43.9 |
| 2338 | 2B | 44605 | IWB44605 | Kukri_c36756_316           | 43.9 |
| 2339 | 2B | 62221 | IWB62221 | RAC875_rep_c113555_122     | 43.9 |
| 2340 | 2B | 73607 | IWB73607 | Tdurum_contig83066_276     | 43.9 |
| 2341 | 2B | 81352 | IWA8221  | wsnp_RFL_Contig1074_103556 | 43.9 |
| 2342 | 2B | 24397 | IWB24397 | Excalibur_c26042_260       | 43.9 |
| 2343 | 2B | 40383 | IWB40383 | Kukri_c106282_114          | 43.9 |
| 2344 | 2B | 37419 | IWB37419 | JD_c39990_130              | 43.9 |
| 2345 | 2B | 22202 | IWB22202 | Excalibur_c1305_662        | 43.9 |
| 2346 | 2B | 32005 | IWB32005 | GENE-0644_370              | 43.9 |
| 2347 | 2B | 62112 | IWB62112 | RAC875_rep_c112008_519     | 43.9 |
| 2348 | 2B | 38861 | IWB38861 | Ku_c23446_2209             | 43.9 |
| 2349 | 2B | 50813 | IWB50813 | Ra_c106376_879             | 43.9 |
| 2350 | 2B | 32006 | IWB32006 | GENE-0644_42               | 43.9 |
| 2351 | 2B | 77183 | IWA2624  | wsnp_Ex_c2153_4043746      | 43.9 |
| 2352 | 2B | 80335 | IWA6838  | wsnp_Ku_c28266_38201643    | 43.9 |
| 2353 | 2B | 47512 | IWB47512 | Kukri_c7139_6288           | 43.9 |
| 2354 | 2B | 11568 | IWB11568 | BS00088575_51              | 43.9 |
| 2355 | 2B | 32007 | IWB32007 | GENE-0644_421              | 43.9 |
| 2356 | 2B | 2285  | IWB2285  | BobWhite_c29572_73         | 43.9 |
| 2357 | 2B | 26119 | IWB26119 | Excalibur_c40229_76        | 43.9 |
| 2358 | 2B | 12063 | IWB12063 | BS00099361_51              | 44.2 |
| 2359 | 2B | 34613 | IWB34613 | IAAV2784                   | 44.2 |
| 2360 | 2B | 56586 | IWB56586 | RAC875_c31252_138          | 44.2 |
| 2361 | 2B | 7334  | IWB7334  | BS00022944_51              | 44.2 |
| 2362 | 2B | 53499 | IWB53499 | RAC875_c12191_77           | 44.2 |
| 2363 | 2B | 60825 | IWB60825 | RAC875_c85927_269          | 44.2 |
| 2364 | 2B | 34771 | IWB34771 | IAAV3789                   | 44.2 |
| 2365 | 2B | 23924 | IWB23924 | Excalibur_c23185_155       | 44.2 |
| 2366 | 2B | 7335  | IWB7335  | BS00022949_51              | 44.2 |
| 2367 | 2B | 22852 | IWB22852 | Excalibur_c16798_244       | 44.2 |
| 2368 | 2B | 47399 | IWB47399 | Kukri_c67546_342           | 44.2 |
| 2369 | 2B | 53925 | IWB53925 | RAC875_c14420_100          | 44.2 |
| 2370 | 2B | 22853 | IWB22853 | Excalibur_c16798_281       | 44.2 |
| 2371 | 2B | 44975 | IWB44975 | Kukri_c39968_221           | 44.2 |

|      |    |       |          |                              |      |
|------|----|-------|----------|------------------------------|------|
| 2372 | 2B | 12056 | IWB12056 | BS00099097_51                | 44.2 |
| 2373 | 2B | 44610 | IWB44610 | Kukri_c36783_91              | 44.4 |
| 2374 | 2B | 54123 | IWB54123 | RAC875_c15649_1101           | 44.4 |
| 2375 | 2B | 68715 | IWB68715 | Tdurum_contig18197_86        | 44.4 |
| 2376 | 2B | 7069  | IWB7069  | BS00022417_51                | 44.4 |
| 2377 | 2B | 35158 | IWB35158 | IAAV6156                     | 44.4 |
| 2378 | 2B | 57695 | IWB57695 | RAC875_c41242_133            | 44.4 |
| 2379 | 2B | 63032 | IWB63032 | RAC875_rep_c74590_606        | 44.4 |
| 2380 | 2B | 21988 | IWB21988 | Excalibur_c11863_289         | 44.4 |
| 2381 | 2B | 32258 | IWB32258 | GENE-1147_226                | 44.4 |
| 2382 | 2B | 23709 | IWB23709 | Excalibur_c21882_599         | 44.4 |
| 2383 | 2B | 33642 | IWB33642 | GENE-3867_1133               | 44.4 |
| 2384 | 2B | 73030 | IWB73030 | Tdurum_contig65756_350       | 44.4 |
| 2385 | 2B | 58343 | IWB58343 | RAC875_c47353_350            | 44.4 |
| 2386 | 2B | 63569 | IWB63569 | RFL_Contig1139_602           | 44.4 |
| 2387 | 2B | 66885 | IWB66885 | Tdurum_contig10994_617       | 44.4 |
| 2388 | 2B | 80092 | IWA6509  | wsnp_Ku_c13905_22034406      | 44.4 |
| 2389 | 2B | 75949 | IWA897   | wsnp_CAP11_rep_c8700_3756682 | 44.4 |
| 2390 | 2B | 10408 | IWB10408 | BS00069627_51                | 44.4 |
| 2391 | 2B | 35020 | IWB35020 | IAAV539                      | 44.4 |
| 2392 | 2B | 63655 | IWB63655 | RFL_Contig1483_1765          | 44.4 |
| 2393 | 2B | 76524 | IWA1763  | wsnp_Ex_c13351_21042379      | 44.4 |
| 2394 | 2B | 35295 | IWB35295 | IAAV7129                     | 44.4 |
| 2395 | 2B | 63570 | IWB63570 | RFL_Contig1139_817           | 44.4 |
| 2396 | 2B | 73834 | IWB73834 | Tdurum_contig92963_204       | 44.4 |
| 2397 | 2B | 74443 | IWB74443 | tplb0031k24_254              | 44.4 |
| 2398 | 2B | 34871 | IWB34871 | IAAV4434                     | 44.4 |
| 2399 | 2B | 4196  | IWB4196  | BobWhite_c662_148            | 44.4 |
| 2400 | 2B | 80953 | IWA7661  | wsnp_Ra_c16822_25566950      | 44.4 |
| 2401 | 2B | 11527 | IWB11527 | BS00087793_51                | 44.4 |
| 2402 | 2B | 73197 | IWB73197 | Tdurum_contig71387_65        | 44.4 |
| 2403 | 2B | 38081 | IWB38081 | Ku_c103035_323               | 44.4 |
| 2404 | 2B | 32069 | IWB32069 | GENE-0724_612                | 45.0 |
| 2405 | 2B | 60513 | IWB60513 | RAC875_c7827_218             | 45.0 |
| 2406 | 2B | 65998 | IWB65998 | TA005635-0459                | 45.0 |
| 2407 | 2B | 24026 | IWB24026 | Excalibur_c23723_141         | 45.0 |
| 2408 | 2B | 77663 | IWA3277  | wsnp_Ex_c3044_5620102        | 45.3 |
| 2409 | 2B | 8294  | IWB8294  | BS00041921_51                | 45.3 |
| 2410 | 2B | 45219 | IWB45219 | Kukri_c42244_809             | 45.8 |
| 2411 | 2B | 13596 | IWB13596 | CAP12_rep_c4483_301          | 46.4 |
| 2412 | 2B | 76047 | IWA1087  | wsnp_CAP7_c402_217331        | 46.4 |
| 2413 | 2B | 65378 | IWB65378 | TA001322-1176                | 46.4 |
| 2414 | 2B | 79043 | IWA5038  | wsnp_Ex_rep_c101906_87187119 | 46.4 |
| 2415 | 2B | 79812 | IWA6075  | wsnp_JD_c4699_5834958        | 46.4 |
| 2416 | 2B | 50518 | IWB50518 | Kukri_rep_c94009_116         | 46.4 |
| 2417 | 2B | 35009 | IWB35009 | IAAV5331                     | 46.4 |
| 2418 | 2B | 40225 | IWB40225 | Kukri_c10054_567             | 46.4 |
| 2419 | 2B | 11686 | IWB11686 | BS00091007_51                | 46.4 |
| 2420 | 2B | 77785 | IWA3428  | wsnp_Ex_c33246_41764093      | 46.4 |
| 2421 | 2B | 79847 | IWA6136  | wsnp_JD_c6350_7517130        | 46.4 |
| 2422 | 2B | 4614  | IWB4614  | BobWhite_c948_52             | 46.4 |
| 2423 | 2B | 8334  | IWB8334  | BS00043103_51                | 46.4 |
| 2424 | 2B | 44901 | IWB44901 | Kukri_c39230_362             | 46.7 |
| 2425 | 2B | 8099  | IWB8099  | BS00037278_51                | 46.7 |

|      |    |       |          |                             |      |
|------|----|-------|----------|-----------------------------|------|
| 2426 | 2B | 61226 | IWB61226 | RAC875_c97988_87            | 46.7 |
| 2427 | 2B | 80327 | IWA6830  | wsnp_Ku_c27759_37702654     | 46.7 |
| 2428 | 2B | 48313 | IWB48313 | Kukri_c9281_71              | 47.0 |
| 2429 | 2B | 6017  | IWB6017  | BS00007901_51               | 47.5 |
| 2430 | 2B | 53627 | IWB53627 | RAC875_c12968_1526          | 47.5 |
| 2431 | 2B | 75453 | IWA170   | wsnp_BE445278B_Ta_2_3       | 47.5 |
| 2432 | 2B | 58269 | IWB58269 | RAC875_c46661_184           | 47.5 |
| 2433 | 2B | 75452 | IWA169   | wsnp_BE445278B_Ta_2_1       | 47.5 |
| 2434 | 2B | 8102  | IWB8102  | BS00037345_51               | 47.5 |
| 2435 | 2B | 29314 | IWB29314 | Excalibur_c90811_88         | 47.5 |
| 2436 | 2B | 22675 | IWB22675 | Excalibur_c15696_1280       | 47.5 |
| 2437 | 2B | 78702 | IWA4606  | wsnp_Ex_c7003_12065828      | 47.5 |
| 2438 | 2B | 58691 | IWB58691 | RAC875_c5080_915            | 47.5 |
| 2439 | 2B | 64964 | IWB64964 | RFL_Contig5290_1493         | 47.5 |
| 2440 | 2B | 19446 | IWB19446 | D_GDS7LZN02HZNCY_321        | 47.5 |
| 2441 | 2B | 57293 | IWB57293 | RAC875_c3752_890            | 47.5 |
| 2442 | 2B | 75877 | IWA771   | wsnp_CAP11_c5240_2436441    | 47.5 |
| 2443 | 2B | 75882 | IWA777   | wsnp_CAP11_c5474_2542616    | 47.5 |
| 2444 | 2B | 76065 | IWA1130  | wsnp_CAP7_rep_c7349_3284058 | 47.5 |
| 2445 | 2B | 76105 | IWA1229  | wsnp_CAP8_rep_c4147_2032009 | 47.5 |
| 2446 | 2B | 78311 | IWA4100  | wsnp_Ex_c51352_55323092     | 47.5 |
| 2447 | 2B | 75881 | IWA776   | wsnp_CAP11_c5474_2542512    | 47.5 |
| 2448 | 2B | 81067 | IWA7821  | wsnp_Ra_c2842_5399988       | 47.5 |
| 2449 | 2B | 22676 | IWB22676 | Excalibur_c15696_737        | 47.5 |
| 2450 | 2B | 39776 | IWB39776 | Ku_c6546_718                | 47.5 |
| 2451 | 2B | 14833 | IWB14833 | CAP8_c5800_150              | 47.5 |
| 2452 | 2B | 14239 | IWB14239 | CAP7_c7349_21               | 47.5 |
| 2453 | 2B | 14712 | IWB14712 | CAP8_c3982_23               | 47.5 |
| 2454 | 2B | 65623 | IWB65623 | TA002964-0938               | 47.5 |
| 2455 | 2B | 60612 | IWB60612 | RAC875_c8045_231            | 47.5 |
| 2456 | 2B | 4546  | IWB4546  | BobWhite_c892_73            | 47.5 |
| 2457 | 2B | 54447 | IWB54447 | RAC875_c17331_129           | 47.5 |
| 2458 | 2B | 59317 | IWB59317 | RAC875_c57901_354           | 47.5 |
| 2459 | 2B | 76110 | IWA1237  | wsnp_CAP8_rep_c5599_2654989 | 47.5 |
| 2460 | 2B | 51511 | IWB51511 | Ra_c23048_474               | 47.5 |
| 2461 | 2B | 5274  | IWB5274  | BobWhite_rep_c61602_139     | 48.7 |
| 2462 | 2B | 27246 | IWB27246 | Excalibur_c5169_598         | 48.7 |
| 2463 | 2B | 8834  | IWB8834  | BS00061268_51               | 48.7 |
| 2464 | 2B | 59746 | IWB59746 | RAC875_c63112_460           | 48.7 |
| 2465 | 2B | 68884 | IWB68884 | Tdurum_contig20589_247      | 48.7 |
| 2466 | 2B | 61926 | IWB61926 | RAC875_rep_c109975_192      | 48.7 |
| 2467 | 2B | 23131 | IWB23131 | Excalibur_c18417_285        | 48.7 |
| 2468 | 2B | 19067 | IWB19067 | D_GDEEGVY02G3Q15_336        | 50.1 |
| 2469 | 2B |       | barc18   |                             | 50.1 |
| 2470 | 2B | 40605 | IWB40605 | Kukri_c11488_874            | 51.0 |
| 2471 | 2B | 17014 | IWB17014 | D_contig65683_344           | 51.0 |
| 2472 | 2B | 685   | IWB685   | BobWhite_c14686_86          | 52.7 |
| 2473 | 2B | 66959 | IWB66959 | Tdurum_contig11172_443      | 52.7 |
| 2474 | 2B | 75562 | IWA326   | wsnp_be499362B_Td_2_1       | 52.7 |
| 2475 | 2B | 14855 | IWB14855 | CAP8_c6219_239              | 52.7 |
| 2476 | 2B | 67903 | IWB67903 | Tdurum_contig13223_701      | 52.7 |
| 2477 | 2B | 64813 | IWB64813 | RFL_Contig4849_702          | 52.7 |
| 2478 | 2B | 72819 | IWB72819 | Tdurum_contig61682_187      | 52.7 |
| 2479 | 2B | 72999 | IWB72999 | Tdurum_contig64751_120      | 52.9 |

|      |    |       |          |                              |      |
|------|----|-------|----------|------------------------------|------|
| 2480 | 2B | 1520  | IWB1520  | BobWhite_c21705_722          | 52.9 |
| 2481 | 2B | 1518  | IWB1518  | BobWhite_c21705_196          | 52.9 |
| 2482 | 2B | 73000 | IWB73000 | Tdurum_contig64751_231       | 52.9 |
| 2483 | 2B | 78067 | IWA3786  | wsnp_Ex_c41558_48356869      | 54.6 |
| 2484 | 2B | 51291 | IWB51291 | Ra_c1799_1066                | 54.6 |
| 2485 | 2B | 39834 | IWB39834 | Ku_c68762_669                | 54.6 |
| 2486 | 2B | 30234 | IWB30234 | Excalibur_rep_c106939_325    | 54.6 |
| 2487 | 2B | 12692 | IWB12692 | CAP11_c1476_128              | 54.6 |
| 2488 | 2B | 80475 | IWA7019  | wsnp_Ku_c4004_7311479        | 54.6 |
| 2489 | 2B | 79662 | IWA5846  | wsnp_JD_c14405_14144807      | 54.6 |
| 2490 | 2B | 78066 | IWA3785  | wsnp_Ex_c41558_48356814      | 54.6 |
| 2491 | 2B | 36462 | IWB36462 | Jagger_c1810_163             | 54.6 |
| 2492 | 2B | 51844 | IWB51844 | Ra_c32699_410                | 54.6 |
| 2493 | 2B | 43105 | IWB43105 | Kukri_c25281_99              | 54.6 |
| 2494 | 2B | 79115 | IWA5128  | wsnp_Ex_rep_c105129_89641882 | 54.6 |
| 2495 | 2B | 79875 | IWA6175  | wsnp_JD_c758_1132463         | 54.6 |
| 2496 | 2B | 80439 | IWA6969  | wsnp_Ku_c3780_6950286        | 54.6 |
| 2497 | 2B | 40624 | IWB40624 | Kukri_c11566_386             | 54.6 |
| 2498 | 2B | 52801 | IWB52801 | Ra_c9190_1384                | 54.6 |
| 2499 | 2B | 62680 | IWB62680 | RAC875_rep_c70357_917        | 54.6 |
| 2500 | 2B | 76458 | IWA1690  | wsnp_Ex_c128_255285          | 54.6 |
| 2501 | 2B | 76910 | IWA2253  | wsnp_Ex_c17700_26446810      | 54.6 |
| 2502 | 2B | 79431 | IWA5525  | wsnp_Ex_rep_c68386_67199155  | 54.6 |
| 2503 | 2B | 21339 | IWB21339 | Ex_c7958_1923                | 54.6 |
| 2504 | 2B | 24879 | IWB24879 | Excalibur_c29734_1152        | 54.6 |
| 2505 | 2B | 69329 | IWB69329 | Tdurum_contig27828_177       | 54.6 |
| 2506 | 2B | 79020 | IWA5008  | wsnp_Ex_rep_c101349_86725007 | 54.6 |
| 2507 | 2B | 46339 | IWB46339 | Kukri_c53402_251             | 54.6 |
| 2508 | 2B | 56421 | IWB56421 | RAC875_c30053_167            | 54.6 |
| 2509 | 2B | 77415 | IWA2955  | wsnp_Ex_c25217_34481787      | 54.6 |
| 2510 | 2B | 67747 | IWB67747 | Tdurum_contig12836_418       | 54.6 |
| 2511 | 2B | 78903 | IWA4853  | wsnp_Ex_c8894_14858193       | 54.6 |
| 2512 | 2B | 3657  | IWB3657  | BobWhite_c4843_282           | 54.6 |
| 2513 | 2B |       | gwm388   |                              | 59.4 |
| 2514 | 2B | 69151 | IWB69151 | Tdurum_contig25629_415       | 60.8 |
| 2515 | 2B | 11849 | IWB11849 | BS00093993_51                | 61.1 |
| 2516 | 2B | 19389 | IWB19389 | D_GDS7LZN02G536K_199         | 61.1 |
| 2517 | 2B | 25875 | IWB25875 | Excalibur_c37804_518         | 61.1 |
| 2518 | 2B | 28529 | IWB28529 | Excalibur_c6922_1393         | 61.1 |
| 2519 | 2B | 43186 | IWB43186 | Kukri_c25815_263             | 61.1 |
| 2520 | 2B | 75491 | IWA226   | wsnp_BE490267A_Ta_2_1        | 61.1 |
| 2521 | 2B | 6667  | IWB6667  | BS00019285_51                | 61.1 |
| 2522 | 2B | 7263  | IWB7263  | BS00022800_51                | 61.1 |
| 2523 | 2B | 35303 | IWB35303 | IAAV717                      | 61.1 |
| 2524 | 2B | 36041 | IWB36041 | IACX5850                     | 61.1 |
| 2525 | 2B | 53996 | IWB53996 | RAC875_c14775_1048           | 61.1 |
| 2526 | 2B | 64817 | IWB64817 | RFL_Contig4856_71            | 61.1 |
| 2527 | 2B | 9286  | IWB9286  | BS00064448_51                | 61.1 |
| 2528 | 2B | 79347 | IWA5411  | wsnp_Ex_rep_c67543_66165372  | 61.1 |
| 2529 | 2B | 35013 | IWB35013 | IAAV5350                     | 61.1 |
| 2530 | 2B | 30756 | IWB30756 | Excalibur_rep_c66577_159     | 61.1 |
| 2531 | 2B | 8009  | IWB8009  | BS00035335_51                | 61.1 |
| 2532 | 2B | 20922 | IWB20922 | Ex_c55735_1012               | 61.7 |
| 2533 | 2B | 11808 | IWB11808 | BS00093403_51                | 61.7 |

|      |    |       |          |                           |      |
|------|----|-------|----------|---------------------------|------|
| 2534 | 2B | 78443 | IWA4275  | wsnp_Ex_c55735_58127324   | 61.7 |
| 2535 | 2B | 49567 | IWB49567 | Kukri_rep_c112675_676     | 61.7 |
| 2536 | 2B | 32126 | IWB32126 | GENE-0872_133             | 61.7 |
| 2537 | 2B | 55736 | IWB55736 | RAC875_c25035_958         | 62.8 |
| 2538 | 2B | 32410 | IWB32410 | GENE-1352_214             | 62.8 |
| 2539 | 2B | 70242 | IWB70242 | Tdurum_contig31414_100    | 62.8 |
| 2540 | 2B | 39865 | IWB39865 | Ku_c6970_2174             | 63.1 |
| 2541 | 2B | 73199 | IWB73199 | Tdurum_contig7144_602     | 63.1 |
| 2542 | 2B | 32140 | IWB32140 | GENE-0910_153             | 63.1 |
| 2543 | 2B | 47474 | IWB47474 | Kukri_c693_87             | 63.1 |
| 2544 | 2B | 6524  | IWB6524  | BS00012071_51             | 63.1 |
| 2545 | 2B | 10507 | IWB10507 | BS00070861_51             | 63.1 |
| 2546 | 2B | 11345 | IWB11345 | BS00084130_51             | 63.1 |
| 2547 | 2B | 76917 | IWA2261  | wsnp_Ex_c17845_26604587   | 63.1 |
| 2548 | 2B | 73198 | IWB73198 | Tdurum_contig7144_248     | 63.1 |
| 2549 | 2B | 10411 | IWB10411 | BS00069685_51             | 63.1 |
| 2550 | 2B | 28591 | IWB28591 | Excalibur_c71500_231      | 63.1 |
| 2551 | 2B | 43828 | IWB43828 | Kukri_c3024_1163          | 63.7 |
| 2552 | 2B | 35244 | IWB35244 | IAAV677                   | 63.7 |
| 2553 | 2B | 47695 | IWB47695 | Kukri_c7666_746           | 63.7 |
| 2554 | 2B | 24309 | IWB24309 | Excalibur_c25414_806      | 63.7 |
| 2555 | 2B | 62876 | IWB62876 | RAC875_rep_c72476_295     | 63.7 |
| 2556 | 2B | 66494 | IWB66494 | Tdurum_contig10380_87     | 63.7 |
| 2557 | 2B | 67609 | IWB67609 | Tdurum_contig12459_664    | 63.7 |
| 2558 | 2B | 68993 | IWB68993 | Tdurum_contig23247_66     | 63.7 |
| 2559 | 2B | 73241 | IWB73241 | Tdurum_contig74826_330    | 63.7 |
| 2560 | 2B | 66493 | IWB66493 | Tdurum_contig10380_278    | 63.7 |
| 2561 | 2B | 72164 | IWB72164 | Tdurum_contig51168_326    | 63.7 |
| 2562 | 2B | 11092 | IWB11092 | BS00079621_51             | 63.7 |
| 2563 | 2B | 47694 | IWB47694 | Kukri_c7666_2637          | 63.7 |
| 2564 | 2B | 1665  | IWB1665  | BobWhite_c23054_1464      | 63.7 |
| 2565 | 2B | 47691 | IWB47691 | Kukri_c7666_1389          | 63.7 |
| 2566 | 2B | 73669 | IWB73669 | Tdurum_contig84620_175    | 63.7 |
| 2567 | 2B | 72096 | IWB72096 | Tdurum_contig50589_867    | 63.7 |
| 2568 | 2B | 1664  | IWB1664  | BobWhite_c23054_1192      | 63.7 |
| 2569 | 2B | 45932 | IWB45932 | Kukri_c49007_501          | 63.9 |
| 2570 | 2B | 78182 | IWA3935  | wsnp_Ex_c4542_8154800     | 63.9 |
| 2571 | 2B | 78932 | IWA4890  | wsnp_Ex_c922_1775246      | 63.9 |
| 2572 | 2B | 11045 | IWB11045 | BS00079013_51             | 63.9 |
| 2573 | 2B | 32487 | IWB32487 | GENE-1444_162             | 63.9 |
| 2574 | 2B | 78972 | IWA4948  | wsnp_Ex_c9628_15927045    | 63.9 |
| 2575 | 2B | 41820 | IWB41820 | Kukri_c1782_1678          | 63.9 |
| 2576 | 2B | 66389 | IWB66389 | Tdurum_contig10237_356    | 63.9 |
| 2577 | 2B | 76220 | IWA1389  | wsnp_Ex_c10796_17575074   | 63.9 |
| 2578 | 2B | 57521 | IWB57521 | RAC875_c3947_441          | 63.9 |
| 2579 | 2B | 309   | IWB309   | BobWhite_c12134_1140      | 63.9 |
| 2580 | 2B | 1661  | IWB1661  | BobWhite_c23046_293       | 63.9 |
| 2581 | 2B | 30332 | IWB30332 | Excalibur_rep_c108225_302 | 64.2 |
| 2582 | 2B | 72542 | IWB72542 | Tdurum_contig5691_596     | 64.5 |
| 2583 | 2B | 72651 | IWB72651 | Tdurum_contig59522_420    | 64.5 |
| 2584 | 2B | 78509 | IWA4357  | wsnp_Ex_c58274_59638884   | 64.5 |
| 2585 | 2B | 78510 | IWA4358  | wsnp_Ex_c58274_59639258   | 64.5 |
| 2586 | 2B | 13870 | IWB13870 | CAP7_c1933_170            | 64.5 |
| 2587 | 2B | 49572 | IWB49572 | Kukri_rep_c112754_101     | 64.5 |



|      |    |       |          |                             |      |
|------|----|-------|----------|-----------------------------|------|
| 2588 | 2B | 53839 | IWB53839 | RAC875_c14039_299           | 64.5 |
| 2589 | 2B | 76954 | IWA2318  | wsnp_Ex_c18503_27349536     | 64.5 |
| 2590 | 2B | 78508 | IWA4356  | wsnp_Ex_c58274_59638635     | 64.5 |
| 2591 | 2B | 1556  | IWB1556  | BobWhite_c22106_204         | 64.5 |
| 2592 | 2B | 72650 | IWB72650 | Tdurum_contig59522_262      | 64.5 |
| 2593 | 2B | 3891  | IWB3891  | BobWhite_c5543_492          | 64.5 |
| 2594 | 2B | 64882 | IWB64882 | RFL_Contig5073_1003         | 64.5 |
| 2595 | 2B | 73114 | IWB73114 | Tdurum_contig68666_570      | 64.5 |
| 2596 | 2B | 12045 | IWB12045 | BS00098739_51               | 64.5 |
| 2597 | 2B | 77760 | IWA3395  | wsnp_Ex_c32493_41138957     | 64.5 |
| 2598 | 2B | 73343 | IWB73343 | Tdurum_contig76090_916      | 64.5 |
| 2599 | 2B | 72541 | IWB72541 | Tdurum_contig5691_526       | 64.5 |
| 2600 | 2B | 81090 | IWA7850  | wsnp_Ra_c31353_40494768     | 64.8 |
| 2601 | 2B | 12654 | IWB12654 | CAP11_c1036_238             | 64.8 |
| 2602 | 2B | 11159 | IWB11159 | BS00080967_51               | 64.8 |
| 2603 | 2B | 51807 | IWB51807 | Ra_c31353_172               | 64.8 |
| 2604 | 2B | 28479 | IWB28479 | Excalibur_c6769_758         | 65.1 |
| 2605 | 2B | 11302 | IWB11302 | BS00083497_51               | 65.1 |
| 2606 | 2B | 28478 | IWB28478 | Excalibur_c6769_1371        | 65.1 |
| 2607 | 2B | 28337 | IWB28337 | Excalibur_c64983_65         | 65.1 |
| 2608 | 2B | 11868 | IWB11868 | BS00094373_51               | 65.1 |
| 2609 | 2B | 74926 | IWB74926 | tplb0049b10_696             | 65.1 |
| 2610 | 2B | 73172 | IWB73172 | Tdurum_contig70510_462      | 65.1 |
| 2611 | 2B | 68759 | IWB68759 | Tdurum_contig18858_324      | 65.1 |
| 2612 | 2B | 65910 | IWB65910 | TA004957-0405               | 65.1 |
| 2613 | 2B | 72911 | IWB72911 | Tdurum_contig62800_207      | 65.1 |
| 2614 | 2B | 8421  | IWB8421  | BS00046166_51               | 65.1 |
| 2615 | 2B | 7131  | IWB7131  | BS00022518_51               | 65.1 |
| 2616 | 2B | 23831 | IWB23831 | Excalibur_c22637_235        | 65.3 |
| 2617 | 2B | 22281 | IWB22281 | Excalibur_c1353_1364        | 65.3 |
| 2618 | 2B | 102   | IWB102   | BobWhite_c1072_100          | 65.3 |
| 2619 | 2B | 67208 | IWB67208 | Tdurum_contig11653_371      | 65.3 |
| 2620 | 2B | 56162 | IWB56162 | RAC875_c28108_400           | 65.3 |
| 2621 | 2B | 4443  | IWB4443  | BobWhite_c8253_397          | 65.6 |
| 2622 | 2B | 5436  | IWB5436  | BobWhite_rep_c64049_232     | 65.6 |
| 2623 | 2B | 6453  | IWB6453  | BS00011630_51               | 65.6 |
| 2624 | 2B | 9117  | IWB9117  | BS00063727_51               | 65.6 |
| 2625 | 2B | 11451 | IWB11451 | BS00086322_51               | 65.6 |
| 2626 | 2B | 48248 | IWB48248 | Kukri_c9118_1774            | 65.6 |
| 2627 | 2B | 51068 | IWB51068 | Ra_c13679_2284              | 65.6 |
| 2628 | 2B | 78034 | IWA3742  | wsnp_Ex_c40976_47910672     | 65.6 |
| 2629 | 2B | 81334 | IWA8195  | wsnp_Ra_rep_c74497_72390803 | 65.6 |
| 2630 | 2B | 73472 | IWB73472 | Tdurum_contig80351_311      | 65.6 |
| 2631 | 2B | 76474 | IWA1708  | wsnp_Ex_c12922_20473104     | 65.6 |
| 2632 | 2B | 77103 | IWA2514  | wsnp_Ex_c20182_29230528     | 65.6 |
| 2633 | 2B | 78033 | IWA3741  | wsnp_Ex_c40976_47910144     | 65.6 |
| 2634 | 2B | 1188  | IWB1188  | BobWhite_c18540_351         | 65.6 |
| 2635 | 2B | 2982  | IWB2982  | BobWhite_c3871_1596         | 65.6 |
| 2636 | 2B | 37190 | IWB37190 | JD_c2156_2040               | 65.6 |
| 2637 | 2B | 35003 | IWB35003 | IAAV5307                    | 65.6 |
| 2638 | 2B | 76473 | IWA1707  | wsnp_Ex_c12922_20472434     | 65.6 |
| 2639 | 2B | 9247  | IWB9247  | BS00064318_51               | 65.6 |
| 2640 | 2B | 32165 | IWB32165 | GENE-0966_173               | 65.6 |
| 2641 | 2B | 43170 | IWB43170 | Kukri_c25716_445            | 65.6 |

|      |    |       |          |                              |      |
|------|----|-------|----------|------------------------------|------|
| 2642 | 2B | 1630  | IWB1630  | BobWhite_c22728_257          | 65.6 |
| 2643 | 2B | 9873  | IWB9873  | BS00066719_51                | 65.9 |
| 2644 | 2B | 46242 | IWB46242 | Kukri_c52356_96              | 65.9 |
| 2645 | 2B | 32190 | IWB32190 | GENE-1012_680                | 65.9 |
| 2646 | 2B | 36270 | IWB36270 | IACX8096                     | 65.9 |
| 2647 | 2B | 68283 | IWB68283 | Tdurum_contig14707_251       | 65.9 |
| 2648 | 2B | 43934 | IWB43934 | Kukri_c31059_130             | 65.9 |
| 2649 | 2B | 81396 | IWA8295  | wsnp_RFL_Contig2123_1397739  | 65.9 |
| 2650 | 2B | 22762 | IWB22762 | Excalibur_c1625_1215         | 67.3 |
| 2651 | 2B | 77358 | IWA2873  | wsnp_Ex_c24135_33382521      | 67.6 |
| 2652 | 2B | 77576 | IWA3176  | wsnp_Ex_c28627_37743031      | 67.6 |
| 2653 | 2B | 36072 | IWB36072 | IACX5941                     | 67.6 |
| 2654 | 2B | 34664 | IWB34664 | IAAV3100                     | 67.6 |
| 2655 | 2B | 68692 | IWB68692 | Tdurum_contig17826_338       | 69.0 |
| 2656 | 2B | 39394 | IWB39394 | Ku_c4168_1399                | 69.0 |
| 2657 | 2B | 25281 | IWB25281 | Excalibur_c32980_169         | 69.9 |
| 2658 | 2B | 9514  | IWB9514  | BS00065327_51                | 69.9 |
| 2659 | 2B | 9560  | IWB9560  | BS00065471_51                | 69.9 |
| 2660 | 2B | 46631 | IWB46631 | Kukri_c57014_168             | 72.6 |
| 2661 | 2B | 516   | IWB516   | BobWhite_c13525_262          | 72.6 |
| 2662 | 2B | 71742 | IWB71742 | Tdurum_contig47_185          | 73.1 |
| 2663 | 2B | 73846 | IWB73846 | Tdurum_contig93103_284       | 73.1 |
| 2664 | 2B | 73196 | IWB73196 | Tdurum_contig71365_233       | 73.1 |
| 2665 | 2B | 11280 | IWB11280 | BS00082967_51                | 81.7 |
| 2666 | 2B | 79078 | IWA5081  | wsnp_Ex_rep_c103064_88104690 | 81.7 |
| 2667 | 2B | 10251 | IWB10251 | BS00068181_51                | 81.7 |
| 2668 | 2B | 11174 | IWB11174 | BS00081189_51                | 82.3 |
| 2669 | 2B | 11366 | IWB11366 | BS00084417_51                | 87.9 |
| 2670 | 2B | 28108 | IWB28108 | Excalibur_c62234_105         | 87.9 |
| 2671 | 2B | 23797 | IWB23797 | Excalibur_c224_1383          | 87.9 |
| 2672 | 2B | 36334 | IWB36334 | IACX8947                     | 87.9 |
| 2673 | 2B | 32416 | IWB32416 | GENE-1355_130                | 87.9 |
| 2674 | 2B | 59983 | IWB59983 | RAC875_c65882_668            | 87.9 |
| 2675 | 2B | 32417 | IWB32417 | GENE-1355_265                | 87.9 |
| 2676 | 2B | 11123 | IWB11123 | BS00080318_51                | 87.9 |
| 2677 | 2B | 28191 | IWB28191 | Excalibur_c63327_110         | 87.9 |
| 2678 | 2B | 36286 | IWB36286 | IACX8298                     | 88.2 |
| 2679 | 2B | 11101 | IWB11101 | BS00079941_51                | 88.2 |
| 2680 | 2B | 6113  | IWB6113  | BS00009791_51                | 88.2 |
| 2681 | 2B | 56526 | IWB56526 | RAC875_c30797_179            | 88.2 |
| 2682 | 2B | 2534  | IWB2534  | BobWhite_c32319_268          | 88.2 |
| 2683 | 2B | 2535  | IWB2535  | BobWhite_c32319_313          | 88.2 |
| 2684 | 2B | 6334  | IWB6334  | BS00011047_51                | 88.2 |
| 2685 | 2B | 5864  | IWB5864  | BS00003673_51                | 88.2 |
| 2686 | 2B | 36753 | IWB36753 | Jagger_c7688_98              | 88.2 |
| 2687 | 2B | 8813  | IWB8813  | BS00060618_51                | 88.2 |
| 2688 | 2B | 34773 | IWB34773 | IAAV3800                     | 94.4 |
| 2689 | 2B | 40501 | IWB40501 | Kukri_c11040_787             | 94.4 |
| 2690 | 2B | 32262 | IWB32262 | GENE-1151_455                | 94.4 |
| 2691 | 2B | 61339 | IWB61339 | RAC875_rep_c102485_468       | 94.4 |
| 2692 | 2B | 46560 | IWB46560 | Kukri_c55909_1109            | 94.4 |
| 2693 | 2B | 54701 | IWB54701 | RAC875_c1858_2693            | 94.4 |
| 2694 | 2B | 47255 | IWB47255 | Kukri_c657_1607              | 95.0 |
| 2695 | 2B | 5427  | IWB5427  | BobWhite_rep_c64004_321      | 95.0 |

|      |    |       |          |                          |       |
|------|----|-------|----------|--------------------------|-------|
| 2696 | 2B | 73375 | IWB73375 | Tdurum_contig76550_1261  | 95.0  |
| 2697 | 2B | 28596 | IWB28596 | Excalibur_c71561_356     | 95.0  |
| 2698 | 2B | 54383 | IWB54383 | RAC875_c1696_991         | 95.0  |
| 2699 | 2B | 61115 | IWB61115 | RAC875_c95081_166        | 95.0  |
| 2700 | 2B | 27625 | IWB27625 | Excalibur_c56062_223     | 95.0  |
| 2701 | 2B | 45108 | IWB45108 | Kukri_c4117_160          | 95.0  |
| 2702 | 2B | 60544 | IWB60544 | RAC875_c78921_228        | 95.0  |
| 2703 | 2B | 60546 | IWB60546 | RAC875_c78921_418        | 95.0  |
| 2704 | 2B | 45109 | IWB45109 | Kukri_c4117_2196         | 95.0  |
| 2705 | 2B | 44451 | IWB44451 | Kukri_c35459_419         | 95.0  |
| 2706 | 2B | 47254 | IWB47254 | Kukri_c657_1514          | 95.0  |
| 2707 | 2B | 68997 | IWB68997 | Tdurum_contig234_1093    | 95.0  |
| 2708 | 2B | 45110 | IWB45110 | Kukri_c4117_2610         | 95.0  |
| 2709 | 2B | 27661 | IWB27661 | Excalibur_c56550_71      | 96.1  |
| 2710 | 2B | 27660 | IWB27660 | Excalibur_c56550_425     | 96.1  |
| 2711 | 2B | 54348 | IWB54348 | RAC875_c16727_1826       | 96.1  |
| 2712 | 2B | 62356 | IWB62356 | RAC875_rep_c116263_97    | 96.1  |
| 2713 | 2B | 40458 | IWB40458 | Kukri_c10869_489         | 96.1  |
| 2714 | 2B | 40455 | IWB40455 | Kukri_c10869_1366        | 96.1  |
| 2715 | 2B | 63210 | IWB63210 | RAC875_rep_c83950_222    | 96.1  |
| 2716 | 2B | 40456 | IWB40456 | Kukri_c10869_1591        | 96.1  |
| 2717 | 2B | 63604 | IWB63604 | RFL_Contig1307_382       | 96.7  |
| 2718 | 2B | 71    | IWB71    | BobWhite_c10520_1517     | 96.7  |
| 2719 | 2B | 1795  | IWB1795  | BobWhite_c24069_152      | 99.3  |
| 2720 | 2B | 27094 | IWB27094 | Excalibur_c49875_479     | 99.3  |
| 2721 | 2B | 1796  | IWB1796  | BobWhite_c24069_257      | 99.3  |
| 2722 | 2B | 29325 | IWB29325 | Excalibur_c910_946       | 99.6  |
| 2723 | 2B | 4319  | IWB4319  | BobWhite_c7274_333       | 99.9  |
| 2724 | 2B | 4318  | IWB4318  | BobWhite_c7274_197       | 99.9  |
| 2725 | 2B | 66206 | IWB66206 | Tdurum_contig10048_447   | 99.9  |
| 2726 | 2B | 32211 | IWB32211 | GENE-1056_55             | 99.9  |
| 2727 | 2B | 55153 | IWB55153 | RAC875_c21269_1225       | 99.9  |
| 2728 | 2B | 72278 | IWB72278 | Tdurum_contig52627_726   | 99.9  |
| 2729 | 2B | 66207 | IWB66207 | Tdurum_contig10048_61    | 99.9  |
| 2730 | 2B | 429   | IWB429   | BobWhite_c12911_788      | 100.1 |
| 2731 | 2B | 4585  | IWB4585  | BobWhite_c923_208        | 100.1 |
| 2732 | 2B | 3073  | IWB3073  | BobWhite_c39769_102      | 100.1 |
| 2733 | 2B | 428   | IWB428   | BobWhite_c12911_649      | 100.1 |
| 2734 | 2B | 12842 | IWB12842 | CAP11_c3226_221          | 100.1 |
| 2735 | 2B | 75860 | IWA746   | wsnp_CAP11_c3226_1588070 | 100.1 |
| 2736 | 2B | 74780 | IWB74780 | tplb0043n06_1748         | 100.1 |
| 2737 | 2B | 8157  | IWB8157  | BS00039187_51            | 100.1 |
| 2738 | 2B | 74399 | IWB74399 | tplb0030f06_593          | 100.1 |
| 2739 | 2B | 62759 | IWB62759 | RAC875_rep_c71149_1446   | 100.1 |
| 2740 | 2B | 62498 | IWB62498 | RAC875_rep_c119322_54    | 100.1 |
| 2741 | 2B | 58205 | IWB58205 | RAC875_c4602_445         | 100.1 |
| 2742 | 2B | 56582 | IWB56582 | RAC875_c31214_58         | 100.1 |
| 2743 | 2B | 55807 | IWB55807 | RAC875_c25513_403        | 100.1 |
| 2744 | 2B | 54751 | IWB54751 | RAC875_c18928_455        | 100.1 |
| 2745 | 2B | 32143 | IWB32143 | GENE-0918_159            | 100.1 |
| 2746 | 2B | 11295 | IWB11295 | BS00083329_51            | 100.1 |
| 2747 | 2B | 62757 | IWB62757 | RAC875_rep_c71149_1113   | 100.1 |
| 2748 | 2B | 12724 | IWB12724 | CAP11_c1820_244          | 100.1 |
| 2749 | 2B | 7106  | IWB7106  | BS00022478_51            | 100.1 |

|      |    |       |          |                             |       |
|------|----|-------|----------|-----------------------------|-------|
| 2750 | 2B | 7580  | IWB7580  | BS00025538_51               | 101.3 |
| 2751 | 2B | 46858 | IWB46858 | Kukri_c60352_344            | 101.3 |
| 2752 | 2B | 41694 | IWB41694 | Kukri_c17_967               | 101.3 |
| 2753 | 2B | 48388 | IWB48388 | Kukri_c94792_127            | 101.3 |
| 2754 | 2B | 54389 | IWB54389 | RAC875_c16993_196           | 101.3 |
| 2755 | 2B | 1354  | IWB1354  | BobWhite_c20158_834         | 101.3 |
| 2756 | 2B | 24905 | IWB24905 | Excalibur_c2993_457         | 101.3 |
| 2757 | 2B | 69343 | IWB69343 | Tdurum_contig27848_179      | 101.3 |
| 2758 | 2B | 53581 | IWB53581 | RAC875_c12741_101           | 101.3 |
| 2759 | 2B | 66438 | IWB66438 | Tdurum_contig10295_374      | 101.3 |
| 2760 | 2B | 36409 | IWB36409 | Jagger_c10188_98            | 101.3 |
| 2761 | 2B | 79371 | IWA5442  | wsnp_Ex_rep_c67697_66363222 | 101.3 |
| 2762 | 2B | 28735 | IWB28735 | Excalibur_c74925_338        | 108.8 |
| 2763 | 2B | 8698  | IWB8698  | BS00056642_51               | 108.8 |
| 2764 | 2B | 31468 | IWB31468 | Excalibur_rep_c99170_89     | 108.8 |
| 2765 | 2B | 13375 | IWB13375 | CAP12_c3549_159             | 109.0 |
| 2766 | 2D | 9640  | IWB9640  | BS00065823_51               | 0.0   |
| 2767 | 2D |       | barc124a |                             | 0.8   |
| 2768 | 2D |       | gwm210   |                             | 2.8   |
| 2769 | 2D |       | Xrwgs46  |                             | 4.2   |
| 2770 | 2D | 44405 | IWB44405 | Kukri_c3507_158             | 4.2   |
| 2771 | 2D | 19115 | IWB19115 | D_GDEEGVY02I0IOX_61         | 4.2   |
| 2772 | 2D |       | Xrwgs47  |                             | 4.2   |
| 2773 | 2D | 19123 | IWB19123 | D_GDEEGVY02IF3IH_412        | 4.2   |
| 2774 | 2D |       | Xrwgs49  |                             | 4.2   |
| 2775 | 2D | 15863 | IWB15863 | D_contig17313_245           | 4.2   |
| 2776 | 2D | 18107 | IWB18107 | D_GB5Y7FA02HSMR1_278        | 4.2   |
| 2777 | 2D | 15798 | IWB15798 | D_contig15948_318           | 4.5   |
| 2778 | 2D | 32345 | IWB32345 | GENE-1273_438               | 4.5   |
| 2779 | 2D | 32346 | IWB32346 | GENE-1273_59                | 4.5   |
| 2780 | 2D | 17693 | IWB17693 | D_GA8KES401A6022_87         | 4.5   |
| 2781 | 2D | 65062 | IWB65062 | RFL_Contig5625_912          | 4.8   |
| 2782 | 2D | 42892 | IWB42892 | Kukri_c23961_636            | 4.8   |
| 2783 | 2D | 27930 | IWB27930 | Excalibur_c60081_474        | 4.8   |
| 2784 | 2D | 24437 | IWB24437 | Excalibur_c26388_776        | 4.8   |
| 2785 | 2D | 25308 | IWB25308 | Excalibur_c33173_557        | 4.8   |
| 2786 | 2D | 29454 | IWB29454 | Excalibur_c94336_103        | 4.8   |
| 2787 | 2D | 29455 | IWB29455 | Excalibur_c94336_68         | 4.8   |
| 2788 | 2D | 43851 | IWB43851 | Kukri_c30439_2407           | 4.8   |
| 2789 | 2D |       | barc95   |                             | 6.5   |
| 2790 | 2D | 8864  | IWB8864  | BS00062567_51               | 6.5   |
| 2791 | 2D |       | cf36     |                             | 7.6   |
| 2792 | 2D |       | gwm455   |                             | 9.9   |
| 2793 | 2D | 11455 | IWB11455 | BS00086387_51               | 13.1  |
| 2794 | 2D | 76594 | IWA1854  | wsnp_Ex_c1408_2704613       | 13.1  |
| 2795 | 2D |       | wmc25a   |                             | 14.0  |
| 2796 | 2D |       | gwm261   |                             | 15.7  |
| 2797 | 2D | 18440 | IWB18440 | D_GBF1XID02GZJU7_294        | 15.9  |
| 2798 | 2D |       | wmc112   |                             | 17.1  |
| 2799 | 2D | 17749 | IWB17749 | D_GA8KES401CIV9Z_240        | 19.6  |
| 2800 | 2D | 66133 | IWB66133 | TA015657-0632               | 20.4  |
| 2801 | 2D | 7313  | IWB7313  | BS00022900_51               | 21.2  |
| 2802 | 2D | 39128 | IWB39128 | Ku_c30824_149               | 21.2  |
| 2803 | 2D | 4030  | IWB4030  | BobWhite_c59161_181         | 21.2  |

|      |    |       |          |                             |      |
|------|----|-------|----------|-----------------------------|------|
| 2804 | 2D | 11986 | IWB11986 | BS00097126_51               | 21.2 |
| 2805 | 2D | 18098 | IWB18098 | D_GB5Y7FA02HINSP_259        | 21.2 |
| 2806 | 2D | 17603 | IWB17603 | D_F5XZDLF02FL9O3_63         | 21.2 |
| 2807 | 2D | 11824 | IWB11824 | BS00093757_51               | 21.2 |
| 2808 | 2D | 17274 | IWB17274 | D_contig95075_76            | 21.2 |
| 2809 | 2D | 74411 | IWB74411 | tplb0030j08_1960            | 21.2 |
| 2810 | 2D | 16431 | IWB16431 | D_contig29912_428           | 22.6 |
| 2811 | 2D | 7001  | IWB7001  | BS00022276_51               | 22.6 |
| 2812 | 2D | 27050 | IWB27050 | Excalibur_c49396_284        | 22.6 |
| 2813 | 2D | 18745 | IWB18745 | D_GBUVHFX02JKG4A_54         | 23.4 |
| 2814 | 2D | 26920 | IWB26920 | Excalibur_c48050_258        | 31.4 |
| 2815 | 2D | 75654 | IWA461   | wsnp_BF428792D_Ta_1_3       | 35.5 |
| 2816 | 2D |       | cf43     |                             | 37.1 |
| 2817 | 2D | 10652 | IWB10652 | BS00073229_51               | 39.7 |
| 2818 | 2D | 78609 | IWA4496  | wsnp_Ex_c6400_11123059      | 39.7 |
| 2819 | 2D | 20902 | IWB20902 | Ex_c54373_394               | 39.7 |
| 2820 | 2D | 39648 | IWB39648 | Ku_c57043_1232              | 39.7 |
| 2821 | 2D | 49647 | IWB49647 | Kukri_rep_c114322_506       | 39.7 |
| 2822 | 2D | 3556  | IWB3556  | BobWhite_c47086_539         | 40.2 |
| 2823 | 2D | 77018 | IWA2406  | wsnp_Ex_c19364_28303089     | 40.5 |
| 2824 | 2D | 62606 | IWB62606 | RAC875_rep_c69728_528       | 40.5 |
| 2825 | 2D |       | gwm102   |                             | 41.3 |
| 2826 | 2D | 32279 | IWB32279 | GENE-1172_825               | 42.7 |
| 2827 | 2D | 37806 | IWB37806 | JD_c7554_234                | 42.7 |
| 2828 | 2D | 9072  | IWB9072  | BS00063517_51               | 42.7 |
| 2829 | 2D | 46874 | IWB46874 | Kukri_c60627_74             | 42.7 |
| 2830 | 2D | 50095 | IWB50095 | Kukri_rep_c71152_906        | 43.2 |
| 2831 | 2D | 56624 | IWB56624 | RAC875_c31560_141           | 44.1 |
| 2832 | 2D | 34311 | IWB34311 | IAAV1002                    | 44.1 |
| 2833 | 2D | 50203 | IWB50203 | Kukri_rep_c72558_961        | 44.6 |
| 2834 | 2D | 11078 | IWB11078 | BS00079440_51               | 47.2 |
| 2835 | 2D | 10084 | IWB10084 | BS00067584_51               | 47.2 |
| 2836 | 2D | 16756 | IWB16756 | D_contig38408_245           | 48.3 |
| 2837 | 2D | 26673 | IWB26673 | Excalibur_c45516_323        | 49.5 |
| 2838 | 2D | 6737  | IWB6737  | BS00021718_51               | 49.7 |
| 2839 | 2D | 28708 | IWB28708 | Excalibur_c74304_438        | 50.0 |
| 2840 | 2D | 17334 | IWB17334 | D_F1BEJMU02FXGZS_209        | 50.0 |
| 2841 | 2D | 1095  | IWB1095  | BobWhite_c17783_72          | 51.4 |
| 2842 | 2D | 27336 | IWB27336 | Excalibur_c5278_1075        | 51.4 |
| 2843 | 2D | 28572 | IWB28572 | Excalibur_c7110_90          | 54.7 |
| 2844 | 2D | 50180 | IWB50180 | Kukri_rep_c72254_186        | 56.1 |
| 2845 | 2D | 45860 | IWB45860 | Kukri_c48285_218            | 57.5 |
| 2846 | 2D | 81403 | IWA8304  | wsnp_RFL_Contig2179_1504740 | 60.3 |
| 2847 | 2D | 65806 | IWB65806 | TA004261-0545               | 60.3 |
| 2848 | 2D | 65480 | IWB65480 | TA001971-1035               | 60.3 |
| 2849 | 2D | 19266 | IWB19266 | D_GDS7LZN01A0SB8_137        | 60.3 |
| 2850 | 2D | 66042 | IWB66042 | TA006024-1567               | 61.4 |
| 2851 | 2D | 17721 | IWB17721 | D_GA8KES401BCXP1_137        | 62.0 |
| 2852 | 2D | 17019 | IWB17019 | D_contig66185_656           | 62.8 |
| 2853 | 2D | 19068 | IWB19068 | D_GDEEGVY02G3V8E_62         | 64.8 |
| 2854 | 2D | 17394 | IWB17394 | D_F5MV3MU01AO39J_375        | 65.1 |
| 2855 | 2D | 18300 | IWB18300 | D_GBB4FNX02IBARI_88         | 65.1 |
| 2856 | 2D | 17978 | IWB17978 | D_GB5Y7FA01BKQUB_129        | 65.1 |
| 2857 | 2D | 52874 | IWB52874 | RAC875_c10004_677           | 65.6 |

|      |    |       |          |                           |       |
|------|----|-------|----------|---------------------------|-------|
| 2858 | 2D | 16692 | IWB16692 | D_contig36649_324         | 65.6  |
| 2859 | 2D | 16082 | IWB16082 | D_contig22169_419         | 65.6  |
| 2860 | 2D | 34403 | IWB34403 | IAAV1553                  | 65.9  |
| 2861 | 2D | 15509 | IWB15509 | D_contig09221_35          | 67.0  |
| 2862 | 2D | 63804 | IWB63804 | RFL_Contig2023_1387       | 67.0  |
| 2863 | 2D | 17200 | IWB17200 | D_contig77675_71          | 67.2  |
| 2864 | 2D | 66097 | IWB66097 | TA011647-0807             | 67.2  |
| 2865 | 2D | 19020 | IWB19020 | D_GDEEGVY01DHB6B_126      | 68.4  |
| 2866 | 2D | 57869 | IWB57869 | RAC875_c42714_775         | 71.3  |
| 2867 | 2D | 15107 | IWB15107 | D_contig00087_156         | 72.7  |
| 2868 | 2D | 78851 | IWA4789  | wsnp_Ex_c8303_14001708    | 73.8  |
| 2869 | 2D | 58648 | IWB58648 | RAC875_c50427_176         | 73.8  |
| 2870 | 2D | 16839 | IWB16839 | D_contig51538_130         | 80.9  |
| 2871 | 2D | 484   | IWB484   | BobWhite_c13315_651       | 80.9  |
| 2872 | 2D | 18804 | IWB18804 | D_GCE8AKX01C844Y_59       | 82.0  |
| 2873 | 2D | 54962 | IWB54962 | RAC875_c20187_1313        | 82.6  |
| 2874 | 2D | 5513  | IWB5513  | BobWhite_rep_c64934_62    | 86.1  |
| 2875 | 2D | 65461 | IWB65461 | TA001826-1418             | 86.9  |
| 2876 | 2D | 29432 | IWB29432 | Excalibur_c93588_271      | 93.2  |
| 2877 | 2D | 3126  | IWB3126  | BobWhite_c40561_305       | 93.2  |
| 2878 | 2D | 19132 | IWB19132 | D_GDEEGVY02J1W0B_74       | 93.2  |
| 2879 | 2D | 29964 | IWB29964 | Excalibur_rep_c103649_61  | 94.3  |
| 2880 | 2D | 40724 | IWB40724 | Kukri_c12032_508          | 95.7  |
| 2881 | 2D | 60317 | IWB60317 | RAC875_c7201_229          | 96.8  |
| 2882 | 2D | 56721 | IWB56721 | RAC875_c32340_462         | 98.4  |
| 2883 | 2D | 75576 | IWA345   | wsnp_BE517946D-Ta_1_2     | 98.7  |
| 2884 | 2D | 33200 | IWB33200 | GENE-3066_157             | 102.2 |
| 2885 | 2D | 44088 | IWB44088 | Kukri_c32355_1089         | 103.6 |
| 2886 | 2D | 39799 | IWB39799 | Ku_c674_915               | 103.6 |
| 2887 | 2D | 75181 | IWB75181 | tplb0058k20_1741          | 103.8 |
| 2888 | 2D | 15775 | IWB15775 | D_contig15273_311         | 103.8 |
| 2889 | 2D | 48051 | IWB48051 | Kukri_c85862_95           | 104.1 |
| 2890 | 2D | 30031 | IWB30031 | Excalibur_rep_c104465_155 | 105.2 |
| 2891 | 2D | 13626 | IWB13626 | CAP12_rep_c5547_123       | 107.4 |
| 2892 | 2D | 60568 | IWB60568 | RAC875_c79540_228         | 110.0 |
| 2893 | 2D | 26538 | IWB26538 | Excalibur_c44325_339      | 110.0 |
| 2894 | 2D | 37221 | IWB37221 | JD_c23444_59              | 113.5 |
| 2895 | 2D | 26227 | IWB26227 | Excalibur_c41445_304      | 115.2 |
| 2896 | 2D | 51195 | IWB51195 | Ra_c1597_2191             | 123.1 |
| 2897 | 2D | 51194 | IWB51194 | Ra_c1597_2155             | 123.1 |
| 2898 | 2D | 20882 | IWB20882 | Ex_c5327_1731             | 123.1 |
| 2899 | 2D | 61260 | IWB61260 | RAC875_c9897_638          | 124.8 |
| 2900 | 2D | 16677 | IWB16677 | D_contig36097_218         | 126.2 |
| 2901 | 2D | 26982 | IWB26982 | Excalibur_c48759_67       | 126.2 |
| 2902 | 2D | 17462 | IWB17462 | D_F5MV3MU01EJU6H_88       | 127.3 |
| 2903 | 2D | 17456 | IWB17456 | D_F5MV3MU01EDEO3_100      | 127.3 |
| 2904 | 2D | 12130 | IWB12130 | BS00100422_51             | 128.7 |
| 2905 | 2D | 14644 | IWB14644 | CAP8_c2833_303            | 128.7 |
| 2906 | 2D | 34359 | IWB34359 | IAAV1322                  | 128.7 |
| 2907 | 2D | 6623  | IWB6623  | BS00015680_51             | 128.7 |
| 2908 | 2D | 30880 | IWB30880 | Excalibur_rep_c67599_242  | 128.7 |
| 2909 | 2D | 30879 | IWB30879 | Excalibur_rep_c67599_2154 | 128.7 |
| 2910 | 2D | 15870 | IWB15870 | D_contig17468_415         | 135.7 |
| 2911 | 2D | 46283 | IWB46283 | Kukri_c5276_447           | 138.2 |

|      |    |       |          |                         |       |
|------|----|-------|----------|-------------------------|-------|
| 2912 | 2D | 78750 | IWA4666  | wsnp_Ex_c7366_12631101  | 139.6 |
| 2913 | 2D | 14819 | IWB14819 | CAP8_c5417_205          | 140.7 |
| 2914 | 2D | 24116 | IWB24116 | Excalibur_c24213_314    | 140.7 |
| 2915 | 2D | 11313 | IWB11313 | BS00083623_51           | 142.1 |
| 2916 | 2D | 26855 | IWB26855 | Excalibur_c4726_1231    | 142.4 |
| 2917 | 2D | 21646 | IWB21646 | Excalibur_c10461_520    | 142.4 |
| 2918 | 2D | 41351 | IWB41351 | Kukri_c1526_616         | 142.4 |
| 2919 | 3A | 13817 | IWB13817 | CAP7_c1467_220          | 0.0   |
| 2920 | 3A | 54475 | IWB54475 | RAC875_c17453_896       | 3.6   |
| 2921 | 3A | 26921 | IWB26921 | Excalibur_c48057_110    | 4.7   |
| 2922 | 3A | 4617  | IWB4617  | BobWhite_c9511_388      | 5.0   |
| 2923 | 3A | 17619 | IWB17619 | D_F5XZDLF02GN47Z_208    | 5.0   |
| 2924 | 3A | 23206 | IWB23206 | Excalibur_c18826_452    | 5.6   |
| 2925 | 3A | 60124 | IWB60124 | RAC875_c67770_822       | 5.6   |
| 2926 | 3A | 8538  | IWB8538  | BS00049420_51           | 5.6   |
| 2927 | 3A | 29214 | IWB29214 | Excalibur_c878_1249     | 6.1   |
| 2928 | 3A | 7659  | IWB7659  | BS00027516_51           | 6.1   |
| 2929 | 3A | 25527 | IWB25527 | Excalibur_c34889_526    | 6.1   |
| 2930 | 3A | 8970  | IWB8970  | BS00062974_51           | 6.1   |
| 2931 | 3A | 11852 | IWB11852 | BS00094057_51           | 6.1   |
| 2932 | 3A | 67382 | IWB67382 | Tdurum_contig12008_1001 | 6.7   |
| 2933 | 3A | 10785 | IWB10785 | BS00075119_51           | 6.7   |
| 2934 | 3A | 10398 | IWB10398 | BS00069355_51           | 7.2   |
| 2935 | 3A | 22161 | IWB22161 | Excalibur_c12875_1573   | 8.1   |
| 2936 | 3A | 7136  | IWB7136  | BS00022524_51           | 8.1   |
| 2937 | 3A | 27973 | IWB27973 | Excalibur_c60530_113    | 8.3   |
| 2938 | 3A | 54698 | IWB54698 | RAC875_c18570_893       | 8.3   |
| 2939 | 3A | 3127  | IWB3127  | BobWhite_c4057_320      | 9.2   |
| 2940 | 3A | 63094 | IWB63094 | RAC875_rep_c77067_347   | 11.0  |
| 2941 | 3A | 8658  | IWB8658  | BS00055211_51           | 11.3  |
| 2942 | 3A | 8502  | IWB8502  | BS00048491_51           | 11.3  |
| 2943 | 3A | 10638 | IWB10638 | BS00073062_51           | 11.3  |
| 2944 | 3A | 12606 | IWB12606 | BS00110921_51           | 11.3  |
| 2945 | 3A | 12967 | IWB12967 | CAP11_c570_73           | 11.3  |
| 2946 | 3A | 11846 | IWB11846 | BS00093975_51           | 11.3  |
| 2947 | 3A | 61740 | IWB61740 | RAC875_rep_c107888_617  | 11.3  |
| 2948 | 3A | 3850  | IWB3850  | BobWhite_c5461_338      | 11.3  |
| 2949 | 3A | 41375 | IWB41375 | Kukri_c15388_1205       | 11.3  |
| 2950 | 3A | 60480 | IWB60480 | RAC875_c77648_367       | 11.3  |
| 2951 | 3A | 60417 | IWB60417 | RAC875_c76367_523       | 11.3  |
| 2952 | 3A | 8501  | IWB8501  | BS00048489_51           | 11.3  |
| 2953 | 3A | 11377 | IWB11377 | BS00084661_51           | 11.3  |
| 2954 | 3A | 77445 | IWA2993  | wsnp_Ex_c2573_4788116   | 11.3  |
| 2955 | 3A | 5950  | IWB5950  | BS00004149_51           | 11.3  |
| 2956 | 3A | 46311 | IWB46311 | Kukri_c53085_574        | 11.3  |
| 2957 | 3A | 7261  | IWB7261  | BS00022798_51           | 11.3  |
| 2958 | 3A | 38606 | IWB38606 | Ku_c17560_146           | 11.3  |
| 2959 | 3A | 38607 | IWB38607 | Ku_c17560_162           | 11.3  |
| 2960 | 3A | 38608 | IWB38608 | Ku_c17560_91            | 11.3  |
| 2961 | 3A | 7003  | IWB7003  | BS00022279_51           | 11.3  |
| 2962 | 3A | 11588 | IWB11588 | BS00088987_51           | 11.6  |
| 2963 | 3A | 63999 | IWB63999 | RFL_Contig2582_455      | 11.6  |
| 2964 | 3A | 24565 | IWB24565 | Excalibur_c27288_413    | 11.6  |
| 2965 | 3A | 50684 | IWB50684 | Kukri_s117068_198       | 11.6  |

|      |    |       |          |                              |      |
|------|----|-------|----------|------------------------------|------|
| 2966 | 3A | 60530 | IWB60530 | RAC875_c787_395              | 11.6 |
| 2967 | 3A | 54955 | IWB54955 | RAC875_c20134_535            | 11.6 |
| 2968 | 3A | 50683 | IWB50683 | Kukri_s117068_130            | 11.6 |
| 2969 | 3A | 44955 | IWB44955 | Kukri_c3982_192              | 11.6 |
| 2970 | 3A | 5952  | IWB5952  | BS00004158_51                | 11.6 |
| 2971 | 3A | 28726 | IWB28726 | Excalibur_c74666_291         | 11.6 |
| 2972 | 3A | 21899 | IWB21899 | Excalibur_c11505_155         | 11.6 |
| 2973 | 3A | 986   | IWB986   | BobWhite_c17021_297          | 11.6 |
| 2974 | 3A | 77323 | IWA2822  | wsnp_Ex_c23633_32868822      | 11.6 |
| 2975 | 3A | 77265 | IWA2737  | wsnp_Ex_c22683_31887736      | 11.6 |
| 2976 | 3A | 81387 | IWA8280  | wsnp_RFL_Contig1999_1190396  | 11.6 |
| 2977 | 3A | 77266 | IWA2738  | wsnp_Ex_c22683_31887799      | 11.6 |
| 2978 | 3A | 12225 | IWB12225 | BS00104401_51                | 11.6 |
| 2979 | 3A | 50548 | IWB50548 | Kukri_rep_c96809_352         | 11.6 |
| 2980 | 3A | 48677 | IWB48677 | Kukri_rep_c101735_236        | 11.6 |
| 2981 | 3A | 34333 | IWB34333 | IAAV1155                     | 11.6 |
| 2982 | 3A | 1704  | IWB1704  | BobWhite_c23392_496          | 11.6 |
| 2983 | 3A | 30427 | IWB30427 | Excalibur_rep_c109599_89     | 11.6 |
| 2984 | 3A | 11545 | IWB11545 | BS00088103_51                | 11.6 |
| 2985 | 3A | 81560 | IWA8587  | wsnp_RFL_Contig4398_5146811  | 11.6 |
| 2986 | 3A | 50434 | IWB50434 | Kukri_rep_c84820_251         | 11.6 |
| 2987 | 3A | 21620 | IWB21620 | Excalibur_c10383_432         | 11.6 |
| 2988 | 3A | 12170 | IWB12170 | BS00101363_51                | 11.6 |
| 2989 | 3A | 29389 | IWB29389 | Excalibur_c92401_157         | 11.8 |
| 2990 | 3A | 12993 | IWB12993 | CAP11_c6193_139              | 11.8 |
| 2991 | 3A | 12994 | IWB12994 | CAP11_c6193_232              | 11.8 |
| 2992 | 3A | 34921 | IWB34921 | IAAV4780                     | 13.8 |
| 2993 | 3A | 29131 | IWB29131 | Excalibur_c85173_190         | 14.4 |
| 2994 | 3A | 52332 | IWB52332 | Ra_c6118_350                 | 15.5 |
| 2995 | 3A | 52333 | IWB52333 | Ra_c6118_450                 | 15.5 |
| 2996 | 3A | 65471 | IWB65471 | TA001885-0568                | 20.0 |
| 2997 | 3A | 31307 | IWB31307 | Excalibur_rep_c80735_81      | 20.0 |
| 2998 | 3A | 26668 | IWB26668 | Excalibur_c4548_2697         | 21.5 |
| 2999 | 3A | 81273 | IWA8105  | wsnp_Ra_c9738_16173810       | 21.5 |
| 3000 | 3A | 81274 | IWA8106  | wsnp_Ra_c9738_16174002       | 21.5 |
| 3001 | 3A | 78185 | IWA3939  | wsnp_Ex_c4548_8166555        | 21.5 |
| 3002 | 3A | 26667 | IWB26667 | Excalibur_c4548_2505         | 21.5 |
| 3003 | 3A | 34361 | IWB34361 | IAAV1328                     | 21.5 |
| 3004 | 3A | 4588  | IWB4588  | BobWhite_c9249_564           | 22.3 |
| 3005 | 3A | 23480 | IWB23480 | Excalibur_c20448_318         | 25.5 |
| 3006 | 3A | 3644  | IWB3644  | BobWhite_c48246_303          | 25.8 |
| 3007 | 3A | 7237  | IWB7237  | BS00022746_51                | 25.8 |
| 3008 | 3A | 63761 | IWB63761 | RFL_Contig1896_1236          | 26.1 |
| 3009 | 3A | 78432 | IWA4257  | wsnp_Ex_c55051_57706127      | 26.4 |
| 3010 | 3A | 79053 | IWA5050  | wsnp_Ex_rep_c102110_87348288 | 26.4 |
| 3011 | 3A | 29612 | IWB29612 | Excalibur_c98205_83          | 26.6 |
| 3012 | 3A | 5723  | IWB5723  | BobWhite_s67516_159          | 27.2 |
| 3013 | 3A | 8523  | IWB8523  | BS00049032_51                | 27.5 |
| 3014 | 3A | 14561 | IWB14561 | CAP8_c1702_71                | 36.0 |
| 3015 | 3A | 75974 | IWA950   | wsnp_CAP12_c2692_1286812     | 36.0 |
| 3016 | 3A | 73771 | IWB73771 | Tdurum_contig91865_242       | 39.9 |
| 3017 | 3A | 10063 | IWB10063 | BS00067499_51                | 41.2 |
| 3018 | 3A | 66127 | IWB66127 | TA015264-0958                | 41.2 |
| 3019 | 3A | 7165  | IWB7165  | BS00022586_51                | 41.2 |



|      |    |       |          |                         |      |
|------|----|-------|----------|-------------------------|------|
| 3020 | 3A | 11450 | IWB11450 | BS00086247_51           | 41.2 |
| 3021 | 3A | 58235 | IWB58235 | RAC875_c46323_1996      | 41.2 |
| 3022 | 3A | 78031 | IWA3739  | wsnp_Ex_c4094_7399975   | 42.7 |
| 3023 | 3A | 466   | IWB466   | BobWhite_c13210_115     | 43.2 |
| 3024 | 3A | 67571 | IWB67571 | Tdurum_contig12371_197  | 43.5 |
| 3025 | 3A | 22751 | IWB22751 | Excalibur_c16197_748    | 43.5 |
| 3026 | 3A | 28136 | IWB28136 | Excalibur_c6264_1054    | 43.7 |
| 3027 | 3A | 73247 | IWB73247 | Tdurum_contig74920_757  | 43.7 |
| 3028 | 3A | 72638 | IWB72638 | Tdurum_contig59358_392  | 43.7 |
| 3029 | 3A | 285   | IWB285   | BobWhite_c11997_246     | 43.7 |
| 3030 | 3A | 28137 | IWB28137 | Excalibur_c6264_249     | 43.7 |
| 3031 | 3A | 50280 | IWB50280 | Kukri_rep_c73936_154    | 44.3 |
| 3032 | 3A | 32370 | IWB32370 | GENE-1300_770           | 44.3 |
| 3033 | 3A | 23249 | IWB23249 | Excalibur_c1905_1117    | 44.3 |
| 3034 | 3A | 4649  | IWB4649  | BobWhite_c9704_273      | 44.3 |
| 3035 | 3A | 40364 | IWB40364 | Kukri_c10511_94         | 44.3 |
| 3036 | 3A | 15006 | IWB15006 | CAP8_rep_c3652_80       | 44.3 |
| 3037 | 3A | 44601 | IWB44601 | Kukri_c3673_2442        | 44.3 |
| 3038 | 3A | 34845 | IWB34845 | IAAV4190                | 44.3 |
| 3039 | 3A | 37966 | IWB37966 | JG_c3077_225            | 44.3 |
| 3040 | 3A | 1102  | IWB1102  | BobWhite_c17852_511     | 44.3 |
| 3041 | 3A | 15056 | IWB15056 | CAP8_rep_c6382_237      | 44.3 |
| 3042 | 3A | 77216 | IWA2664  | wsnp_Ex_c21950_31124594 | 44.3 |
| 3043 | 3A | 29289 | IWB29289 | Excalibur_c9000_209     | 44.3 |
| 3044 | 3A | 58107 | IWB58107 | RAC875_c45016_79        | 44.3 |
| 3045 | 3A | 32591 | IWB32591 | GENE-1674_631           | 44.3 |
| 3046 | 3A | 44372 | IWB44372 | Kukri_c34845_242        | 44.3 |
| 3047 | 3A | 41142 | IWB41142 | Kukri_c14029_117        | 44.3 |
| 3048 | 3A | 47000 | IWB47000 | Kukri_c62467_362        | 44.3 |
| 3049 | 3A | 11867 | IWB11867 | BS00094366_51           | 44.6 |
| 3050 | 3A | 196   | IWB196   | BobWhite_c11298_512     | 44.6 |
| 3051 | 3A | 34591 | IWB34591 | IAAV2646                | 44.6 |
| 3052 | 3A | 24102 | IWB24102 | Excalibur_c24123_165    | 44.6 |
| 3053 | 3A | 21527 | IWB21527 | Excalibur_c10079_1585   | 44.6 |
| 3054 | 3A | 6013  | IWB6013  | BS00007502_51           | 44.6 |
| 3055 | 3A | 8055  | IWB8055  | BS00036492_51           | 44.6 |
| 3056 | 3A | 63098 | IWB63098 | RAC875_rep_c77148_311   | 44.6 |
| 3057 | 3A | 55686 | IWB55686 | RAC875_c2464_274        | 44.6 |
| 3058 | 3A | 33874 | IWB33874 | GENE-4252_246           | 44.6 |
| 3059 | 3A | 7895  | IWB7895  | BS00032524_51           | 44.6 |
| 3060 | 3A | 9559  | IWB9559  | BS00065468_51           | 44.6 |
| 3061 | 3A | 6719  | IWB6719  | BS00021694_51           | 44.6 |
| 3062 | 3A | 73711 | IWB73711 | Tdurum_contig86206_149  | 44.8 |
| 3063 | 3A | 73640 | IWB73640 | Tdurum_contig83561_227  | 47.4 |
| 3064 | 3A | 31551 | IWB31551 | Excalibur_s113043_59    | 47.4 |
| 3065 | 3A | 7130  | IWB7130  | BS00022516_51           | 47.4 |
| 3066 | 3A | 78758 | IWA4676  | wsnp_Ex_c742_1458743    | 47.4 |
| 3067 | 3A | 6837  | IWB6837  | BS00021981_51           | 47.4 |
| 3068 | 3A | 80019 | IWA6413  | wsnp_Ku_c11052_18135847 | 47.4 |
| 3069 | 3A | 36760 | IWB36760 | Jagger_c791_62          | 47.4 |
| 3070 | 3A | 78757 | IWA4675  | wsnp_Ex_c742_1458033    | 47.4 |
| 3071 | 3A | 35234 | IWB35234 | IAAV6676                | 47.4 |
| 3072 | 3A | 61873 | IWB61873 | RAC875_rep_c109288_122  | 49.3 |
| 3073 | 3A | 71477 | IWB71477 | Tdurum_contig44029_144  | 49.6 |

|      |    |       |          |                             |      |
|------|----|-------|----------|-----------------------------|------|
| 3074 | 3A | 14696 | IWB14696 | CAP8_c359_95                | 49.6 |
| 3075 | 3A | 71479 | IWB71479 | Tdurum_contig44029_621      | 49.6 |
| 3076 | 3A | 63578 | IWB63578 | RFL_Contig1170_1827         | 49.6 |
| 3077 | 3A | 71480 | IWB71480 | Tdurum_contig44029_66       | 49.6 |
| 3078 | 3A | 13522 | IWB13522 | CAP12_c700_173              | 49.6 |
| 3079 | 3A | 30975 | IWB30975 | Excalibur_rep_c68583_689    | 49.6 |
| 3080 | 3A | 2330  | IWB2330  | BobWhite_c30009_285         | 49.6 |
| 3081 | 3A | 65782 | IWB65782 | TA004095-0446               | 49.6 |
| 3082 | 3A | 67277 | IWB67277 | Tdurum_contig11748_889      | 49.9 |
| 3083 | 3A | 68183 | IWB68183 | Tdurum_contig14318_680      | 49.9 |
| 3084 | 3A | 56476 | IWB56476 | RAC875_c30443_966           | 49.9 |
| 3085 | 3A | 71252 | IWB71252 | Tdurum_contig42523_1988     | 49.9 |
| 3086 | 3A | 35588 | IWB35588 | IAAV9068                    | 49.9 |
| 3087 | 3A | 66111 | IWB66111 | TA013323-0732               | 49.9 |
| 3088 | 3A | 65703 | IWB65703 | TA003540-1083               | 49.9 |
| 3089 | 3A | 65580 | IWB65580 | TA002607-0550               | 49.9 |
| 3090 | 3A | 38093 | IWB38093 | Ku_c103671_362              | 49.9 |
| 3091 | 3A | 10464 | IWB10464 | BS00070464_51               | 50.4 |
| 3092 | 3A | 8477  | IWB8477  | BS00047836_51               | 50.4 |
| 3093 | 3A | 70107 | IWB70107 | Tdurum_contig30790_154      | 51.0 |
| 3094 | 3A | 71453 | IWB71453 | Tdurum_contig43850_675      | 51.0 |
| 3095 | 3A | 71452 | IWB71452 | Tdurum_contig43850_140      | 51.0 |
| 3096 | 3A | 66101 | IWB66101 | TA012401-0794               | 51.0 |
| 3097 | 3A | 65939 | IWB65939 | TA005199-0585               | 52.1 |
| 3098 | 3A | 11623 | IWB11623 | BS00089744_51               | 52.1 |
| 3099 | 3A | 12051 | IWB12051 | BS00098840_51               | 52.1 |
| 3100 | 3A | 46143 | IWB46143 | Kukri_c51247_322            | 52.1 |
| 3101 | 3A | 7802  | IWB7802  | BS00030876_51               | 52.1 |
| 3102 | 3A | 79918 | IWA6236  | wsnp_JD_c968_1427139        | 52.1 |
| 3103 | 3A | 76563 | IWA1812  | wsnp_Ex_c13802_21639096     | 52.1 |
| 3104 | 3A | 2769  | IWB2769  | BobWhite_c35303_192         | 52.1 |
| 3105 | 3A | 76900 | IWA2239  | wsnp_Ex_c1763_3333974       | 52.1 |
| 3106 | 3A | 29610 | IWB29610 | Excalibur_c9811_131         | 52.1 |
| 3107 | 3A | 76724 | IWA2019  | wsnp_Ex_c1538_2937905       | 52.4 |
| 3108 | 3A | 30707 | IWB30707 | Excalibur_rep_c116073_259   | 52.4 |
| 3109 | 3A | 67595 | IWB67595 | Tdurum_contig12430_156      | 52.4 |
| 3110 | 3A | 26160 | IWB26160 | Excalibur_c40694_473        | 52.6 |
| 3111 | 3A | 78239 | IWA4009  | wsnp_Ex_c48136_53140385     | 52.9 |
| 3112 | 3A | 34987 | IWB34987 | IAAV5207                    | 52.9 |
| 3113 | 3A | 68071 | IWB68071 | Tdurum_contig13734_1070     | 52.9 |
| 3114 | 3A | 19997 | IWB19997 | Ex_c17586_108               | 52.9 |
| 3115 | 3A | 27966 | IWB27966 | Excalibur_c60452_196        | 52.9 |
| 3116 | 3A | 79335 | IWA5399  | wsnp_Ex_rep_c67460_66057400 | 52.9 |
| 3117 | 3A | 11609 | IWB11609 | BS00089400_51               | 53.7 |
| 3118 | 3A | 20642 | IWB20642 | Ex_c3994_1294               | 53.7 |
| 3119 | 3A | 39272 | IWB39272 | Ku_c3602_226                | 53.7 |
| 3120 | 3A | 2241  | IWB2241  | BobWhite_c28950_147         | 53.7 |
| 3121 | 3A | 72601 | IWB72601 | Tdurum_contig57753_138      | 53.7 |
| 3122 | 3A | 22700 | IWB22700 | Excalibur_c15848_960        | 53.7 |
| 3123 | 3A | 55328 | IWB55328 | RAC875_c22333_504           | 53.7 |
| 3124 | 3A | 67553 | IWB67553 | Tdurum_contig12319_165      | 53.7 |
| 3125 | 3A | 72529 | IWB72529 | Tdurum_contig56748_632      | 53.7 |
| 3126 | 3A | 9817  | IWB9817  | BS00066475_51               | 53.7 |
| 3127 | 3A | 37891 | IWB37891 | JD_c9434_297                | 53.7 |

|      |    |       |          |                              |      |
|------|----|-------|----------|------------------------------|------|
| 3128 | 3A | 41095 | IWB41095 | Kukri_c13793_1152            | 53.7 |
| 3129 | 3A | 77281 | IWA2763  | wsnp_Ex_c22888_32105519      | 53.7 |
| 3130 | 3A | 21407 | IWB21407 | Ex_c8871_1318                | 53.7 |
| 3131 | 3A | 4947  | IWB4947  | BobWhite_rep_c51301_1261     | 53.7 |
| 3132 | 3A | 5126  | IWB5126  | BobWhite_rep_c55551_53       | 53.7 |
| 3133 | 3A | 9886  | IWB9886  | BS00066800_51                | 53.7 |
| 3134 | 3A | 14697 | IWB14697 | CAP8_c36_459                 | 53.7 |
| 3135 | 3A | 67857 | IWB67857 | Tdurum_contig13098_184       | 53.7 |
| 3136 | 3A | 39273 | IWB39273 | Ku_c3602_325                 | 53.7 |
| 3137 | 3A | 73154 | IWB73154 | Tdurum_contig697_73          | 53.7 |
| 3138 | 3A | 76765 | IWA2069  | wsnp_Ex_c15848_24235835      | 53.7 |
| 3139 | 3A | 79496 | IWA5616  | wsnp_Ex_rep_c69567_68516173  | 53.7 |
| 3140 | 3A | 39542 | IWB39542 | Ku_c50158_1323               | 53.7 |
| 3141 | 3A | 76787 | IWA2095  | wsnp_Ex_c16079_24507688      | 53.7 |
| 3142 | 3A | 72895 | IWB72895 | Tdurum_contig62502_90        | 53.7 |
| 3143 | 3A | 79328 | IWA5387  | wsnp_Ex_rep_c67349_65914945  | 53.7 |
| 3144 | 3A | 48393 | IWB48393 | Kukri_c94845_415             | 53.7 |
| 3145 | 3A | 65628 | IWB65628 | TA002997-0276                | 53.7 |
| 3146 | 3A | 8105  | IWB8105  | BS00037400_51                | 53.7 |
| 3147 | 3A | 29336 | IWB29336 | Excalibur_c91154_175         | 54.3 |
| 3148 | 3A | 8262  | IWB8262  | BS00041121_51                | 54.3 |
| 3149 | 3A | 79018 | IWA5006  | wsnp_Ex_rep_c101340_86719239 | 54.3 |
| 3150 | 3A | 2801  | IWB2801  | BobWhite_c35789_281          | 54.3 |
| 3151 | 3A | 36921 | IWB36921 | JD_c1187_1398                | 54.3 |
| 3152 | 3A | 79624 | IWA5786  | wsnp_JD_c1187_1731186        | 54.3 |
| 3153 | 3A | 20753 | IWB20753 | Ex_c45438_377                | 54.3 |
| 3154 | 3A | 77838 | IWA3498  | wsnp_Ex_c3478_6369892        | 54.3 |
| 3155 | 3A | 29859 | IWB29859 | Excalibur_rep_c102727_407    | 54.3 |
| 3156 | 3A | 35157 | IWB35157 | IAAV6152                     | 54.3 |
| 3157 | 3A | 79017 | IWA5005  | wsnp_Ex_rep_c101340_86719115 | 54.3 |
| 3158 | 3A | 48979 | IWB48979 | Kukri_rep_c104383_1216       | 54.3 |
| 3159 | 3A | 71668 | IWB71668 | Tdurum_contig46252_1395      | 54.3 |
| 3160 | 3A | 38609 | IWB38609 | Ku_c17569_905                | 54.3 |
| 3161 | 3A | 78947 | IWA4913  | wsnp_Ex_c943_1808577         | 54.6 |
| 3162 | 3A | 49539 | IWB49539 | Kukri_rep_c112061_617        | 54.6 |
| 3163 | 3A | 76248 | IWA1422  | wsnp_Ex_c11039_17902115      | 54.6 |
| 3164 | 3A | 78946 | IWA4912  | wsnp_Ex_c943_1808232         | 54.6 |
| 3165 | 3A | 2205  | IWB2205  | BobWhite_c28464_814          | 54.6 |
| 3166 | 3A | 76647 | IWA1922  | wsnp_Ex_c14681_22747500      | 54.6 |
| 3167 | 3A | 37650 | IWB37650 | JD_c5699_676                 | 54.6 |
| 3168 | 3A | 22237 | IWB22237 | Excalibur_c13242_1178        | 54.6 |
| 3169 | 3A | 77564 | IWA3156  | wsnp_Ex_c28310_37444843      | 54.6 |
| 3170 | 3A | 54860 | IWB54860 | RAC875_c19570_671            | 54.6 |
| 3171 | 3A | 77416 | IWA2956  | wsnp_Ex_c2522_4708394        | 54.6 |
| 3172 | 3A | 77869 | IWA3535  | wsnp_Ex_c3571_6530739        | 54.6 |
| 3173 | 3A | 14495 | IWB14495 | CAP8_c1093_136               | 54.6 |
| 3174 | 3A | 76838 | IWA2156  | wsnp_Ex_c16615_25147492      | 54.6 |
| 3175 | 3A | 75706 | IWA538   | wsnp_BG263769A_Td_2_1        | 54.6 |
| 3176 | 3A | 79497 | IWA5617  | wsnp_Ex_rep_c69577_68526990  | 54.6 |
| 3177 | 3A | 81563 | IWA8590  | wsnp_RFL_Contig4404_5157920  | 54.6 |
| 3178 | 3A | 49444 | IWB49444 | Kukri_rep_c110312_376        | 54.6 |
| 3179 | 3A | 79621 | IWA5782  | wsnp_JD_c11273_11770307      | 54.6 |
| 3180 | 3A | 79834 | IWA6108  | wsnp_JD_c5699_6859527        | 54.6 |
| 3181 | 3A | 81388 | IWA8283  | wsnp_RFL_Contig2011_1216801  | 54.6 |

|      |    |       |          |                              |      |
|------|----|-------|----------|------------------------------|------|
| 3182 | 3A | 42984 | IWB42984 | Kukri_c2454_59               | 54.6 |
| 3183 | 3A | 71028 | IWB71028 | Tdurum_contig42234_2052      | 54.8 |
| 3184 | 3A | 38468 | IWB38468 | Ku_c1485_980                 | 55.4 |
| 3185 | 3A | 68422 | IWB68422 | Tdurum_contig15529_135       | 55.4 |
| 3186 | 3A | 75704 | IWA536   | wsnp_BG263758A_Ta_1_1        | 55.4 |
| 3187 | 3A | 76466 | IWA1699  | wsnp_Ex_c12850_20377830      | 56.5 |
| 3188 | 3A | 76259 | IWA1435  | wsnp_Ex_c11085_17973016      | 57.3 |
| 3189 | 3A | 53805 | IWB53805 | RAC875_c13895_763            | 57.3 |
| 3190 | 3A | 75506 | IWA249   | wsnp_BE494474A_Ta_2_2        | 57.6 |
| 3191 | 3A | 10508 | IWB10508 | BS00070870_51                | 58.2 |
| 3192 | 3A | 63579 | IWB63579 | RFL_Contig1175_354           | 58.2 |
| 3193 | 3A | 11966 | IWB11966 | BS00096642_51                | 58.2 |
| 3194 | 3A | 27319 | IWB27319 | Excalibur_c52446_519         | 58.2 |
| 3195 | 3A | 1175  | IWB1175  | BobWhite_c18408_199          | 58.2 |
| 3196 | 3A | 2350  | IWB2350  | BobWhite_c30232_154          | 58.2 |
| 3197 | 3A | 75421 | IWA132   | wsnp_BE443568A_Ta_2_1        | 58.2 |
| 3198 | 3A | 8196  | IWB8196  | BS00039925_51                | 58.2 |
| 3199 | 3A | 73647 | IWB73647 | Tdurum_contig83663_371       | 58.2 |
| 3200 | 3A | 45790 | IWB45790 | Kukri_c47643_920             | 58.2 |
| 3201 | 3A | 79111 | IWA5124  | wsnp_Ex_rep_c104884_89459472 | 58.2 |
| 3202 | 3A | 75422 | IWA133   | wsnp_BE443568A_Ta_2_2        | 58.2 |
| 3203 | 3A | 56927 | IWB56927 | RAC875_c3427_734             | 58.2 |
| 3204 | 3A | 33677 | IWB33677 | GENE-3939_653                | 58.2 |
| 3205 | 3A | 30072 | IWB30072 | Excalibur_rep_c104884_417    | 58.2 |
| 3206 | 3A | 11773 | IWB11773 | BS00092735_51                | 58.2 |
| 3207 | 3A | 72653 | IWB72653 | Tdurum_contig59531_914       | 58.2 |
| 3208 | 3A | 75858 | IWA743   | wsnp_CAP11_c318_261649       | 58.2 |
| 3209 | 3A | 10203 | IWB10203 | BS00067997_51                | 58.2 |
| 3210 | 3A | 9012  | IWB9012  | BS00063163_51                | 58.2 |
| 3211 | 3A | 7305  | IWB7305  | BS00022882_51                | 58.2 |
| 3212 | 3A | 75497 | IWA234   | wsnp_BE490613A_Ta_2_1        | 58.2 |
| 3213 | 3A | 66938 | IWB66938 | Tdurum_contig11121_739       | 59.3 |
| 3214 | 3A | 66939 | IWB66939 | Tdurum_contig11121_834       | 59.3 |
| 3215 | 3A | 76392 | IWA1605  | wsnp_Ex_c12269_19597415      | 59.6 |
| 3216 | 3A | 80394 | IWA6914  | wsnp_Ku_c3286_6111360        | 59.6 |
| 3217 | 3A | 80794 | IWA7441  | wsnp_Ku_rep_c68484_67500021  | 59.6 |
| 3218 | 3A | 52157 | IWB52157 | Ra_c48730_581                | 59.6 |
| 3219 | 3A | 10468 | IWB10468 | BS00070511_51                | 59.6 |
| 3220 | 3A | 39592 | IWB39592 | Ku_c53625_627                | 59.6 |
| 3221 | 3A | 7381  | IWB7381  | BS00023026_51                | 59.6 |
| 3222 | 3A | 21475 | IWB21475 | Ex_c9685_1264                | 59.6 |
| 3223 | 3A | 78055 | IWA3771  | wsnp_Ex_c41283_48140956      | 59.6 |
| 3224 | 3A | 51985 | IWB51985 | Ra_c38505_544                | 59.6 |
| 3225 | 3A | 80793 | IWA7440  | wsnp_Ku_rep_c68484_67499824  | 59.6 |
| 3226 | 3A | 37155 | IWB37155 | JD_c2026_3994                | 59.6 |
| 3227 | 3A | 63544 | IWB63544 | RFL_Contig1034_2351          | 59.6 |
| 3228 | 3A | 80580 | IWA7150  | wsnp_Ku_c5243_9344536        | 59.6 |
| 3229 | 3A | 39823 | IWB39823 | Ku_c68484_1276               | 59.6 |
| 3230 | 3A | 61453 | IWB61453 | RAC875_rep_c105428_270       | 59.6 |
| 3231 | 3A | 80884 | IWA7564  | wsnp_Ra_c11291_18338838      | 59.6 |
| 3232 | 3A | 76694 | IWA1982  | wsnp_Ex_c15100_23284023      | 59.6 |
| 3233 | 3A | 42389 | IWB42389 | Kukri_c20889_526             | 59.6 |
| 3234 | 3A | 80387 | IWA6907  | wsnp_Ku_c32404_42016343      | 59.6 |
| 3235 | 3A | 78962 | IWA4930  | wsnp_Ex_c9510_15761235       | 59.6 |

|      |    |       |          |                             |      |
|------|----|-------|----------|-----------------------------|------|
| 3236 | 3A | 81181 | IWA7970  | wsnp_Ra_c4858_8709000       | 59.6 |
| 3237 | 3A | 76315 | IWA1507  | wsnp_Ex_c1149_2206471       | 59.6 |
| 3238 | 3A | 34362 | IWB34362 | IAAV1334                    | 59.6 |
| 3239 | 3A | 33344 | IWB33344 | GENE-3343_183               | 59.6 |
| 3240 | 3A | 55513 | IWB55513 | RAC875_c23470_220           | 59.6 |
| 3241 | 3A | 26905 | IWB26905 | Excalibur_c47907_517        | 59.6 |
| 3242 | 3A | 19612 | IWB19612 | Ex_c104581_457              | 59.6 |
| 3243 | 3A | 8115  | IWB8115  | BS00037537_51               | 59.6 |
| 3244 | 3A | 6449  | IWB6449  | BS00011612_51               | 59.6 |
| 3245 | 3A | 60602 | IWB60602 | RAC875_c8010_155            | 59.6 |
| 3246 | 3A | 34552 | IWB34552 | IAAV242                     | 59.6 |
| 3247 | 3A | 11027 | IWB11027 | BS00078669_51               | 59.6 |
| 3248 | 3A | 78056 | IWA3772  | wsnp_Ex_c41283_48141201     | 59.6 |
| 3249 | 3A | 77392 | IWA2925  | wsnp_Ex_c24731_33983680     | 59.6 |
| 3250 | 3A | 76391 | IWA1604  | wsnp_Ex_c12269_19597341     | 59.6 |
| 3251 | 3A | 35184 | IWB35184 | IAAV6317                    | 59.6 |
| 3252 | 3A | 34172 | IWB34172 | GENE-4795_75                | 59.6 |
| 3253 | 3A | 26728 | IWB26728 | Excalibur_c46082_440        | 59.6 |
| 3254 | 3A | 6301  | IWB6301  | BS00010854_51               | 59.6 |
| 3255 | 3A | 81120 | IWA7891  | wsnp_Ra_c35889_44345459     | 59.6 |
| 3256 | 3A | 77919 | IWA3600  | wsnp_Ex_c37208_45002588     | 59.6 |
| 3257 | 3A | 52004 | IWB52004 | Ra_c39556_524               | 59.6 |
| 3258 | 3A | 12173 | IWB12173 | BS00101401_51               | 59.6 |
| 3259 | 3A | 38447 | IWB38447 | Ku_c14313_1194              | 59.6 |
| 3260 | 3A | 34963 | IWB34963 | IAAV5030                    | 59.6 |
| 3261 | 3A | 42049 | IWB42049 | Kukri_c18924_528            | 59.9 |
| 3262 | 3A | 52500 | IWB52500 | Ra_c70087_485               | 59.9 |
| 3263 | 3A | 12317 | IWB12317 | BS00107444_51               | 59.9 |
| 3264 | 3A | 79250 | IWA5286  | wsnp_Ex_rep_c66685_65003625 | 59.9 |
| 3265 | 3A | 80271 | IWA6750  | wsnp_Ku_c23901_33846711     | 60.2 |
| 3266 | 3A | 28070 | IWB28070 | Excalibur_c61765_220        | 60.2 |
| 3267 | 3A | 81110 | IWA7877  | wsnp_Ra_c34117_42876812     | 60.2 |
| 3268 | 3A | 72822 | IWB72822 | Tdurum_contig61819_115      | 60.5 |
| 3269 | 3A | 9177  | IWB9177  | BS00064039_51               | 60.5 |
| 3270 | 3A | 35578 | IWB35578 | IAAV902                     | 60.5 |
| 3271 | 3A | 4133  | IWB4133  | BobWhite_c6300_169          | 61.1 |
| 3272 | 3A | 67254 | IWB67254 | Tdurum_contig11714_304      | 62.2 |
| 3273 | 3A | 8683  | IWB8683  | BS00056089_51               | 71.5 |
| 3274 | 3A | 8830  | IWB8830  | BS00061173_51               | 72.6 |
| 3275 | 3A | 5751  | IWB5751  | BS00000445_51               | 72.6 |
| 3276 | 3A | 8831  | IWB8831  | BS00061179_51               | 72.6 |
| 3277 | 3A | 78959 | IWA4926  | wsnp_Ex_c9483_15722127      | 72.6 |
| 3278 | 3A | 11835 | IWB11835 | BS00093871_51               | 72.6 |
| 3279 | 3A | 65332 | IWB65332 | TA001038-0975               | 72.6 |
| 3280 | 3A | 5794  | IWB5794  | BS00001478_51               | 72.6 |
| 3281 | 3A | 73345 | IWB73345 | Tdurum_contig76105_201      | 72.6 |
| 3282 | 3A | 73344 | IWB73344 | Tdurum_contig76105_124      | 72.6 |
| 3283 | 3A | 11155 | IWB11155 | BS00080879_51               | 72.9 |
| 3284 | 3A | 60142 | IWB60142 | RAC875_c67998_96            | 73.7 |
| 3285 | 3A | 44225 | IWB44225 | Kukri_c33640_640            | 74.0 |
| 3286 | 3A | 32569 | IWB32569 | GENE-1634_405               | 74.0 |
| 3287 | 3A | 65390 | IWB65390 | TA001383-0516               | 74.0 |
| 3288 | 3A | 27980 | IWB27980 | Excalibur_c60581_62         | 74.0 |
| 3289 | 3A | 10607 | IWB10607 | BS00072296_51               | 85.0 |

|      |    |       |          |                              |       |
|------|----|-------|----------|------------------------------|-------|
| 3290 | 3A | 8806  | IWB8806  | BS00060391_51                | 85.0  |
| 3291 | 3A | 76066 | IWA1136  | wsnp_CAP8_c1007_643393       | 86.4  |
| 3292 | 3A | 73699 | IWB73699 | Tdurum_contig8584_354        | 89.1  |
| 3293 | 3A | 73056 | IWB73056 | Tdurum_contig67196_285       | 89.1  |
| 3294 | 3A | 71562 | IWB71562 | Tdurum_contig44880_134       | 89.1  |
| 3295 | 3A | 71563 | IWB71563 | Tdurum_contig44880_314       | 89.1  |
| 3296 | 3A | 71564 | IWB71564 | Tdurum_contig44880_420       | 89.1  |
| 3297 | 3A | 71660 | IWB71660 | Tdurum_contig4598_249        | 89.3  |
| 3298 | 3A | 71663 | IWB71663 | Tdurum_contig4598_638        | 89.3  |
| 3299 | 3A | 58868 | IWB58868 | RAC875_c52805_182            | 89.3  |
| 3300 | 3A | 35917 | IWB35917 | IACX333                      | 89.3  |
| 3301 | 3A | 67125 | IWB67125 | Tdurum_contig11473_847       | 89.3  |
| 3302 | 3A | 71661 | IWB71661 | Tdurum_contig4598_259        | 89.3  |
| 3303 | 3A | 35450 | IWB35450 | IAAV8218                     | 90.2  |
| 3304 | 3A | 7317  | IWB7317  | BS00022908_51                | 90.2  |
| 3305 | 3A | 3798  | IWB3798  | BobWhite_c5337_225           | 93.4  |
| 3306 | 3A | 33349 | IWB33349 | GENE-3346_506                | 93.4  |
| 3307 | 3A | 8010  | IWB8010  | BS00035364_51                | 93.4  |
| 3308 | 3A | 35125 | IWB35125 | IAAV5984                     | 93.4  |
| 3309 | 3A | 73101 | IWB73101 | Tdurum_contig68305_597       | 93.4  |
| 3310 | 3A | 11581 | IWB11581 | BS00088756_51                | 93.4  |
| 3311 | 3A | 73102 | IWB73102 | Tdurum_contig68305_703       | 93.4  |
| 3312 | 3A | 33347 | IWB33347 | GENE-3346_167                | 93.4  |
| 3313 | 3A | 72897 | IWB72897 | Tdurum_contig62557_263       | 93.4  |
| 3314 | 3A | 11580 | IWB11580 | BS00088755_51                | 93.4  |
| 3315 | 3A | 73103 | IWB73103 | Tdurum_contig68305_796       | 93.4  |
| 3316 | 3A | 72394 | IWB72394 | Tdurum_contig54800_615       | 94.3  |
| 3317 | 3A | 25443 | IWB25443 | Excalibur_c3429_652          | 95.1  |
| 3318 | 3A | 8816  | IWB8816  | BS00060666_51                | 96.3  |
| 3319 | 3A | 31324 | IWB31324 | Excalibur_rep_c82288_36      | 97.1  |
| 3320 | 3A | 26085 | IWB26085 | Excalibur_c39833_567         | 97.1  |
| 3321 | 3A | 12566 | IWB12566 | BS00110564_51                | 97.1  |
| 3322 | 3A | 79025 | IWA5015  | wsnp_Ex_rep_c101457_86818160 | 97.1  |
| 3323 | 3A | 77105 | IWA2518  | wsnp_Ex_c20250_29303152      | 97.1  |
| 3324 | 3A | 80007 | IWA6396  | wsnp_Ku_c10468_17301216      | 101.3 |
| 3325 | 3A | 7623  | IWB7623  | BS00026396_51                | 101.3 |
| 3326 | 3A | 31321 | IWB31321 | Excalibur_rep_c82081_188     | 101.3 |
| 3327 | 3A | 9995  | IWB9995  | BS00067228_51                | 101.9 |
| 3328 | 3A | 39724 | IWB39724 | Ku_c6126_1140                | 102.2 |
| 3329 | 3A | 24136 | IWB24136 | Excalibur_c24354_465         | 103.0 |
| 3330 | 3A | 55268 | IWB55268 | RAC875_c21944_117            | 103.0 |
| 3331 | 3A | 26070 | IWB26070 | Excalibur_c3969_1208         | 104.4 |
| 3332 | 3A | 11287 | IWB11287 | BS00083089_51                | 104.4 |
| 3333 | 3A | 26072 | IWB26072 | Excalibur_c3969_713          | 104.4 |
| 3334 | 3A | 72058 | IWB72058 | Tdurum_contig50253_766       | 104.4 |
| 3335 | 3A | 9626  | IWB9626  | BS00065734_51                | 104.4 |
| 3336 | 3A | 32679 | IWB32679 | GENE-1833_70                 | 105.3 |
| 3337 | 3A | 73551 | IWB73551 | Tdurum_contig82189_87        | 105.5 |
| 3338 | 3A | 32725 | IWB32725 | GENE-1918_152                | 105.5 |
| 3339 | 3A | 33546 | IWB33546 | GENE-3665_61                 | 113.1 |
| 3340 | 3A | 366   | IWB366   | BobWhite_c12428_371          | 113.4 |
| 3341 | 3A | 8288  | IWB8288  | BS00041742_51                | 113.4 |
| 3342 | 3A | 75600 | IWA391   | wsnp_BE604885A_Ta_2_2        | 113.9 |
| 3343 | 3A | 9606  | IWB9606  | BS00065673_51                | 113.9 |

|      |    |       |          |                           |       |
|------|----|-------|----------|---------------------------|-------|
| 3344 | 3A | 6092  | IWB6092  | BS00009649_51             | 113.9 |
| 3345 | 3A | 76202 | IWA1367  | wsnp_Ex_c10630_17338753   | 113.9 |
| 3346 | 3A | 81060 | IWA7812  | wsnp_Ra_c27517_37034553   | 113.9 |
| 3347 | 3A | 10961 | IWB10961 | BS00077819_51             | 113.9 |
| 3348 | 3A | 7790  | IWB7790  | BS00030652_51             | 114.2 |
| 3349 | 3A | 13994 | IWB13994 | CAP7_c3178_52             | 114.2 |
| 3350 | 3A | 11837 | IWB11837 | BS00093889_51             | 114.2 |
| 3351 | 3A | 6953  | IWB6953  | BS00022182_51             | 114.2 |
| 3352 | 3A | 8509  | IWB8509  | BS00048633_51             | 116.9 |
| 3353 | 3A | 61868 | IWB61868 | RAC875_rep_c109228_400    | 117.4 |
| 3354 | 3A | 10817 | IWB10817 | BS00075598_51             | 117.4 |
| 3355 | 3A | 34789 | IWB34789 | IAAV3851                  | 118.9 |
| 3356 | 3A | 39004 | IWB39004 | Ku_c26872_269             | 119.7 |
| 3357 | 3A | 77888 | IWA3559  | wsnp_Ex_c361_707953       | 121.2 |
| 3358 | 3A | 77889 | IWA3560  | wsnp_Ex_c361_708712       | 121.2 |
| 3359 | 3A | 56227 | IWB56227 | RAC875_c28721_290         | 122.4 |
| 3360 | 3A | 14312 | IWB14312 | CAP7_c915_121             | 124.2 |
| 3361 | 3B | 51276 | IWB51276 | Ra_c17608_960             | 0.0   |
| 3362 | 3B | 12141 | IWB12141 | BS00100706_51             | 0.8   |
| 3363 | 3B | 1959  | IWB1959  | BobWhite_c260_197         | 0.8   |
| 3364 | 3B | 53982 | IWB53982 | RAC875_c14696_980         | 1.1   |
| 3365 | 3B | 66970 | IWB66970 | Tdurum_contig11192_373    | 1.7   |
| 3366 | 3B | 66050 | IWB66050 | TA006079-0893             | 1.7   |
| 3367 | 3B | 14318 | IWB14318 | CAP7_c9234_109            | 1.7   |
| 3368 | 3B | 8756  | IWB8756  | BS00058861_51             | 1.7   |
| 3369 | 3B | 80063 | IWA6471  | wsnp_Ku_c12698_20441325   | 1.7   |
| 3370 | 3B | 62540 | IWB62540 | RAC875_rep_c69171_92      | 3.0   |
| 3371 | 3B | 59693 | IWB59693 | RAC875_c62483_112         | 4.2   |
| 3372 | 3B | 72136 | IWB72136 | Tdurum_contig50954_394    | 4.2   |
| 3373 | 3B | 57554 | IWB57554 | RAC875_c39793_452         | 4.2   |
| 3374 | 3B | 26097 | IWB26097 | Excalibur_c39985_68       | 4.2   |
| 3375 | 3B | 72137 | IWB72137 | Tdurum_contig50954_475    | 4.2   |
| 3376 | 3B | 72138 | IWB72138 | Tdurum_contig50954_880    | 4.2   |
| 3377 | 3B | 34942 | IWB34942 | IAAV4876                  | 4.2   |
| 3378 | 3B | 44132 | IWB44132 | Kukri_c32803_150          | 4.2   |
| 3379 | 3B | 34636 | IWB34636 | IAAV2929                  | 20.7  |
| 3380 | 3B | 56684 | IWB56684 | RAC875_c32005_247         | 20.7  |
| 3381 | 3B | 41804 | IWB41804 | Kukri_c1771_715           | 20.7  |
| 3382 | 3B | 65347 | IWB65347 | TA001137-1058             | 20.7  |
| 3383 | 3B | 64431 | IWB64431 | RFL_Contig3626_521        | 20.7  |
| 3384 | 3B | 62088 | IWB62088 | RAC875_rep_c111781_179    | 20.7  |
| 3385 | 3B | 30660 | IWB30660 | Excalibur_rep_c114249_187 | 22.1  |
| 3386 | 3B | 72133 | IWB72133 | Tdurum_contig50954_1095   | 22.1  |
| 3387 | 3B | 6062  | IWB6062  | BS00009440_51             | 22.1  |
| 3388 | 3B | 73423 | IWB73423 | Tdurum_contig77551_586    | 22.1  |
| 3389 | 3B | 74350 | IWB74350 | tplb0028p23_852           | 22.1  |
| 3390 | 3B | 74349 | IWB74349 | tplb0028p23_691           | 22.1  |
| 3391 | 3B | 35950 | IWB35950 | IACX4260                  | 22.1  |
| 3392 | 3B | 3685  | IWB3685  | BobWhite_c4864_326        | 22.1  |
| 3393 | 3B | 41709 | IWB41709 | Kukri_c17082_378          | 22.1  |
| 3394 | 3B | 41710 | IWB41710 | Kukri_c17082_519          | 22.1  |
| 3395 | 3B | 40900 | IWB40900 | Kukri_c12817_59           | 22.1  |
| 3396 | 3B | 72135 | IWB72135 | Tdurum_contig50954_1393   | 22.1  |
| 3397 | 3B | 72134 | IWB72134 | Tdurum_contig50954_1264   | 22.1  |

|      |    |       |          |                             |      |
|------|----|-------|----------|-----------------------------|------|
| 3398 | 3B | 73424 | IWB73424 | Tdurum_contig77551_589      | 22.1 |
| 3399 | 3B | 8755  | IWB8755  | BS00058860_51               | 25.6 |
| 3400 | 3B | 70488 | IWB70488 | Tdurum_contig34149_219      | 26.7 |
| 3401 | 3B | 79180 | IWA5203  | wsnp_Ex_rep_c66331_64503065 | 26.9 |
| 3402 | 3B | 6491  | IWB6491  | BS00011904_51               | 26.9 |
| 3403 | 3B | 57531 | IWB57531 | RAC875_c3956_275            | 26.9 |
| 3404 | 3B | 5600  | IWB5600  | BobWhite_rep_c66215_299     | 27.2 |
| 3405 | 3B | 2424  | IWB2424  | BobWhite_c3111_636          | 27.5 |
| 3406 | 3B | 78860 | IWA4800  | wsnp_Ex_c8386_14127329      | 29.2 |
| 3407 | 3B | 68173 | IWB68173 | Tdurum_contig14251_431      | 29.4 |
| 3408 | 3B | 79358 | IWA5426  | wsnp_Ex_rep_c67625_66279491 | 29.4 |
| 3409 | 3B | 12111 | IWB12111 | BS00100045_51               | 29.4 |
| 3410 | 3B | 30730 | IWB30730 | Excalibur_rep_c66331_1967   | 29.4 |
| 3411 | 3B | 78861 | IWA4801  | wsnp_Ex_c8386_14128029      | 29.7 |
| 3412 | 3B | 12745 | IWB12745 | CAP11_c2057_200             | 29.7 |
| 3413 | 3B | 29081 | IWB29081 | Excalibur_c8386_1009        | 29.7 |
| 3414 | 3B | 6931  | IWB6931  | BS00022154_51               | 30.5 |
| 3415 | 3B | 12639 | IWB12639 | BS00111294_51               | 30.5 |
| 3416 | 3B | 67376 | IWB67376 | Tdurum_contig11988_459      | 30.5 |
| 3417 | 3B | 12932 | IWB12932 | CAP11_c527_306              | 30.8 |
| 3418 | 3B | 37219 | IWB37219 | JD_c23336_253               | 31.1 |
| 3419 | 3B | 39567 | IWB39567 | Ku_c519_281                 | 31.1 |
| 3420 | 3B | 71460 | IWB71460 | Tdurum_contig43938_291      | 31.1 |
| 3421 | 3B | 60533 | IWB60533 | RAC875_c787_671             | 31.1 |
| 3422 | 3B | 18164 | IWB18164 | D_GBB4FNX01A83VL_408        | 31.1 |
| 3423 | 3B | 46019 | IWB46019 | Kukri_c49752_254            | 31.1 |
| 3424 | 3B | 62455 | IWB62455 | RAC875_rep_c118229_56       | 31.1 |
| 3425 | 3B | 4653  | IWB4653  | BobWhite_c9711_71           | 31.3 |
| 3426 | 3B | 58931 | IWB58931 | RAC875_c53353_78            | 31.3 |
| 3427 | 3B | 73453 | IWB73453 | Tdurum_contig79629_538      | 31.6 |
| 3428 | 3B | 73471 | IWB73471 | Tdurum_contig80344_144      | 31.6 |
| 3429 | 3B | 74764 | IWB74764 | tplb0043c20_1046            | 31.6 |
| 3430 | 3B | 13827 | IWB13827 | CAP7_c1576_371              | 31.6 |
| 3431 | 3B | 32683 | IWB32683 | GENE-1851_76                | 31.6 |
| 3432 | 3B | 28657 | IWB28657 | Excalibur_c7321_741         | 35.2 |
| 3433 | 3B | 29378 | IWB29378 | Excalibur_c9206_836         | 37.8 |
| 3434 | 3B | 77087 | IWA2493  | wsnp_Ex_c19993_29024127     | 37.8 |
| 3435 | 3B | 35202 | IWB35202 | IAAV6442                    | 37.8 |
| 3436 | 3B | 30033 | IWB30033 | Excalibur_rep_c104498_194   | 37.8 |
| 3437 | 3B | 31375 | IWB31375 | Excalibur_rep_c87664_233    | 37.8 |
| 3438 | 3B | 39782 | IWB39782 | Ku_c663_1896                | 37.8 |
| 3439 | 3B | 77649 | IWA3260  | wsnp_Ex_c3005_5548573       | 37.8 |
| 3440 | 3B | 26991 | IWB26991 | Excalibur_c48841_1380       | 39.0 |
| 3441 | 3B | 8774  | IWB8774  | BS00059385_51               | 39.0 |
| 3442 | 3B | 52160 | IWB52160 | Ra_c488_923                 | 39.0 |
| 3443 | 3B | 20651 | IWB20651 | Ex_c4040_623                | 39.0 |
| 3444 | 3B | 61221 | IWB61221 | RAC875_c9790_116            | 39.0 |
| 3445 | 3B | 52159 | IWB52159 | Ra_c488_1335                | 39.0 |
| 3446 | 3B | 21073 | IWB21073 | Ex_c66395_270               | 39.0 |
| 3447 | 3B | 8751  | IWB8751  | BS00058753_51               | 39.0 |
| 3448 | 3B | 36123 | IWB36123 | IACX6214                    | 39.3 |
| 3449 | 3B | 35843 | IWB35843 | IACX22                      | 39.3 |
| 3450 | 3B | 72944 | IWB72944 | Tdurum_contig63427_344      | 39.8 |
| 3451 | 3B | 74007 | IWB74007 | Tdurum_contig97656_120      | 39.8 |



|      |    |       |          |                             |      |
|------|----|-------|----------|-----------------------------|------|
| 3452 | 3B | 73014 | IWB73014 | Tdurum_contig6501_503       | 39.8 |
| 3453 | 3B | 73013 | IWB73013 | Tdurum_contig6501_449       | 39.8 |
| 3454 | 3B | 8426  | IWB8426  | BS00046375_51               | 40.1 |
| 3455 | 3B | 68098 | IWB68098 | Tdurum_contig13898_648      | 40.1 |
| 3456 | 3B | 60454 | IWB60454 | RAC875_c7724_1312           | 40.1 |
| 3457 | 3B | 76738 | IWA2037  | wsnp_Ex_c1558_2976128       | 40.1 |
| 3458 | 3B | 50786 | IWB50786 | Ra_c10565_1109              | 40.1 |
| 3459 | 3B | 50787 | IWB50787 | Ra_c10565_1214              | 40.1 |
| 3460 | 3B | 64404 | IWB64404 | RFL_Contig3591_1832         | 42.1 |
| 3461 | 3B | 72675 | IWB72675 | Tdurum_contig59668_415      | 42.4 |
| 3462 | 3B | 72015 | IWB72015 | Tdurum_contig49753_191      | 42.4 |
| 3463 | 3B | 9189  | IWB9189  | BS00064077_51               | 42.4 |
| 3464 | 3B | 73813 | IWB73813 | Tdurum_contig92781_536      | 42.4 |
| 3465 | 3B | 10462 | IWB10462 | BS00070455_51               | 45.9 |
| 3466 | 3B | 73558 | IWB73558 | Tdurum_contig82242_224      | 45.9 |
| 3467 | 3B | 2169  | IWB2169  | BobWhite_c28090_175         | 46.4 |
| 3468 | 3B | 34181 | IWB34181 | GENE-4824_212               | 46.4 |
| 3469 | 3B | 39127 | IWB39127 | Ku_c30806_235               | 47.0 |
| 3470 | 3B | 64362 | IWB64362 | RFL_Contig3455_629          | 50.5 |
| 3471 | 3B | 66165 | IWB66165 | Tdurum_contig100212_141     | 50.5 |
| 3472 | 3B | 64363 | IWB64363 | RFL_Contig3455_700          | 50.5 |
| 3473 | 3B | 56030 | IWB56030 | RAC875_c27152_476           | 50.8 |
| 3474 | 3B | 54838 | IWB54838 | RAC875_c19475_61            | 51.3 |
| 3475 | 3B | 9883  | IWB9883  | BS00066797_51               | 51.6 |
| 3476 | 3B | 9884  | IWB9884  | BS00066798_51               | 51.6 |
| 3477 | 3B | 7019  | IWB7019  | BS00022315_51               | 51.6 |
| 3478 | 3B | 11529 | IWB11529 | BS00087825_51               | 51.9 |
| 3479 | 3B | 8689  | IWB8689  | BS00056258_51               | 51.9 |
| 3480 | 3B | 28930 | IWB28930 | Excalibur_c79902_439        | 51.9 |
| 3481 | 3B | 8688  | IWB8688  | BS00056257_51               | 51.9 |
| 3482 | 3B | 10687 | IWB10687 | BS00073732_51               | 52.1 |
| 3483 | 3B | 25620 | IWB25620 | Excalibur_c35645_587        | 55.4 |
| 3484 | 3B | 36611 | IWB36611 | Jagger_c4901_95             | 56.0 |
| 3485 | 3B | 26916 | IWB26916 | Excalibur_c48030_405        | 56.0 |
| 3486 | 3B | 70232 | IWB70232 | Tdurum_contig31379_183      | 56.0 |
| 3487 | 3B | 73992 | IWB73992 | Tdurum_contig97412_270      | 56.0 |
| 3488 | 3B | 41649 | IWB41649 | Kukri_c16792_662            | 56.0 |
| 3489 | 3B | 81493 | IWA8460  | wsnp_RFL_Contig3344_3442711 | 56.0 |
| 3490 | 3B | 35458 | IWB35458 | IAAV8287                    | 56.8 |
| 3491 | 3B | 35437 | IWB35437 | IAAV8162                    | 56.8 |
| 3492 | 3B | 30710 | IWB30710 | Excalibur_rep_c116253_245   | 56.8 |
| 3493 | 3B | 6626  | IWB6626  | BS00016407_51               | 56.8 |
| 3494 | 3B | 30709 | IWB30709 | Excalibur_rep_c116253_175   | 56.8 |
| 3495 | 3B | 5120  | IWB5120  | BobWhite_rep_c55395_200     | 56.8 |
| 3496 | 3B | 34239 | IWB34239 | GENE-4918_402               | 57.0 |
| 3497 | 3B | 80179 | IWA6632  | wsnp_Ku_c17659_26797674     | 57.9 |
| 3498 | 3B | 3423  | IWB3423  | BobWhite_c4502_252          | 58.1 |
| 3499 | 3B | 73082 | IWB73082 | Tdurum_contig67690_183      | 58.1 |
| 3500 | 3B | 38850 | IWB38850 | Ku_c23207_988               | 60.7 |
| 3501 | 3B | 75861 | IWA747   | wsnp_CAP11_c323_263628      | 60.7 |
| 3502 | 3B | 49982 | IWB49982 | Kukri_rep_c70103_146        | 60.7 |
| 3503 | 3B | 14564 | IWB14564 | CAP8_c1799_237              | 60.7 |
| 3504 | 3B | 75862 | IWA748   | wsnp_CAP11_c323_263800      | 60.7 |
| 3505 | 3B | 5902  | IWB5902  | BS00003822_51               | 61.5 |

|      |    |       |          |                             |      |
|------|----|-------|----------|-----------------------------|------|
| 3506 | 3B | 79891 | IWA6192  | wsnp_JD_c828_1226159        | 63.0 |
| 3507 | 3B | 32713 | IWB32713 | GENE-1900_115               | 63.0 |
| 3508 | 3B | 52965 | IWB52965 | RAC875_c10246_839           | 63.0 |
| 3509 | 3B | 24683 | IWB24683 | Excalibur_c2820_889         | 63.0 |
| 3510 | 3B | 62555 | IWB62555 | RAC875_rep_c69316_1516      | 63.0 |
| 3511 | 3B | 21926 | IWB21926 | Excalibur_c11594_246        | 63.0 |
| 3512 | 3B | 33758 | IWB33758 | GENE-4064_715               | 63.0 |
| 3513 | 3B | 11046 | IWB11046 | BS00079014_51               | 63.0 |
| 3514 | 3B | 63252 | IWB63252 | RAC875_rep_c86950_103       | 63.0 |
| 3515 | 3B | 24678 | IWB24678 | Excalibur_c2820_1626        | 63.0 |
| 3516 | 3B | 28825 | IWB28825 | Excalibur_c7706_1936        | 63.0 |
| 3517 | 3B | 245   | IWB245   | BobWhite_c11621_123         | 63.0 |
| 3518 | 3B | 56124 | IWB56124 | RAC875_c2787_1260           | 63.0 |
| 3519 | 3B | 23066 | IWB23066 | Excalibur_c1806_1251        | 63.0 |
| 3520 | 3B | 65864 | IWB65864 | TA004649-0518               | 63.0 |
| 3521 | 3B | 56125 | IWB56125 | RAC875_c2787_470            | 63.0 |
| 3522 | 3B | 35832 | IWB35832 | IACX2048                    | 63.0 |
| 3523 | 3B | 27781 | IWB27781 | Excalibur_c58066_180        | 63.0 |
| 3524 | 3B | 3459  | IWB3459  | BobWhite_c45376_417         | 65.3 |
| 3525 | 3B | 34980 | IWB34980 | IAAV5166                    | 71.0 |
| 3526 | 3B | 14070 | IWB14070 | CAP7_c3916_256              | 71.0 |
| 3527 | 3B | 37878 | IWB37878 | JD_c9193_412                | 71.0 |
| 3528 | 3B | 79220 | IWA5251  | wsnp_Ex_rep_c66509_64776295 | 71.0 |
| 3529 | 3B | 12042 | IWB12042 | BS00098496_51               | 71.0 |
| 3530 | 3B | 8317  | IWB8317  | BS00042337_51               | 71.0 |
| 3531 | 3B | 44271 | IWB44271 | Kukri_c34038_562            | 71.0 |
| 3532 | 3B | 12003 | IWB12003 | BS00097481_51               | 71.0 |
| 3533 | 3B | 75849 | IWA729   | wsnp_CAP11_c272_234769      | 71.0 |
| 3534 | 3B | 79626 | IWA5788  | wsnp_JD_c119_190135         | 71.0 |
| 3535 | 3B | 64490 | IWB64490 | RFL_Contig3799_987          | 71.0 |
| 3536 | 3B | 79219 | IWA5250  | wsnp_Ex_rep_c66509_64775661 | 71.0 |
| 3537 | 3B | 63500 | IWB63500 | RAC875_s119223_94           | 71.0 |
| 3538 | 3B | 7733  | IWB7733  | BS00029548_51               | 71.0 |
| 3539 | 3B | 79304 | IWA5351  | wsnp_Ex_rep_c67067_65534806 | 71.0 |
| 3540 | 3B | 62875 | IWB62875 | RAC875_rep_c72470_124       | 71.0 |
| 3541 | 3B | 41047 | IWB41047 | Kukri_c13537_2069           | 71.0 |
| 3542 | 3B | 34941 | IWB34941 | IAAV4869                    | 71.0 |
| 3543 | 3B | 75481 | IWA211   | wsnp_BE489326B_Ta_2_2       | 71.0 |
| 3544 | 3B | 10391 | IWB10391 | BS00069274_51               | 71.0 |
| 3545 | 3B | 10723 | IWB10723 | BS00074287_51               | 71.0 |
| 3546 | 3B | 36501 | IWB36501 | Jagger_c2707_152            | 71.0 |
| 3547 | 3B | 36923 | IWB36923 | JD_c119_119                 | 71.0 |
| 3548 | 3B | 65427 | IWB65427 | TA001646-1356               | 71.0 |
| 3549 | 3B | 79515 | IWA5638  | wsnp_Ex_rep_c69783_68742690 | 71.0 |
| 3550 | 3B | 27477 | IWB27477 | Excalibur_c54388_193        | 71.0 |
| 3551 | 3B | 75480 | IWA210   | wsnp_BE489326B_Ta_2_1       | 71.0 |
| 3552 | 3B | 80229 | IWA6698  | wsnp_Ku_c210_413608         | 71.0 |
| 3553 | 3B | 57216 | IWB57216 | RAC875_c36859_235           | 71.0 |
| 3554 | 3B | 35317 | IWB35317 | IAAV7265                    | 71.0 |
| 3555 | 3B | 56769 | IWB56769 | RAC875_c32832_411           | 71.0 |
| 3556 | 3B | 40893 | IWB40893 | Kukri_c128_103              | 71.0 |
| 3557 | 3B | 56946 | IWB56946 | RAC875_c34454_334           | 71.0 |
| 3558 | 3B | 79682 | IWA5880  | wsnp_JD_c17082_16025440     | 71.0 |
| 3559 | 3B | 23195 | IWB23195 | Excalibur_c18785_447        | 71.0 |

|      |    |       |          |                             |      |
|------|----|-------|----------|-----------------------------|------|
| 3560 | 3B | 61346 | IWB61346 | RAC875_rep_c102709_719      | 71.0 |
| 3561 | 3B | 63250 | IWB63250 | RAC875_rep_c86918_170       | 71.0 |
| 3562 | 3B | 53619 | IWB53619 | RAC875_c12934_650           | 71.0 |
| 3563 | 3B | 75886 | IWA781   | wsnp_CAP11_c558_382875      | 71.0 |
| 3564 | 3B | 29291 | IWB29291 | Excalibur_c9001_569         | 71.0 |
| 3565 | 3B | 35608 | IWB35608 | IAAV958                     | 71.0 |
| 3566 | 3B | 55764 | IWB55764 | RAC875_c2525_266            | 71.0 |
| 3567 | 3B | 4909  | IWB4909  | BobWhite_rep_c50835_441     | 71.0 |
| 3568 | 3B | 32491 | IWB32491 | GENE-1460_304               | 71.0 |
| 3569 | 3B | 44131 | IWB44131 | Kukri_c32802_706            | 71.0 |
| 3570 | 3B | 55272 | IWB55272 | RAC875_c21955_719           | 71.0 |
| 3571 | 3B | 66842 | IWB66842 | Tdurum_contig10958_356      | 71.0 |
| 3572 | 3B | 45547 | IWB45547 | Kukri_c45609_882            | 71.0 |
| 3573 | 3B | 55765 | IWB55765 | RAC875_c2525_894            | 71.0 |
| 3574 | 3B | 27206 | IWB27206 | Excalibur_c51116_77         | 71.0 |
| 3575 | 3B | 79644 | IWA5813  | wsnp_JD_c12451_12690261     | 71.0 |
| 3576 | 3B | 42550 | IWB42550 | Kukri_c21759_1035           | 71.0 |
| 3577 | 3B | 65362 | IWB65362 | TA001218-0519               | 71.0 |
| 3578 | 3B | 54100 | IWB54100 | RAC875_c15509_436           | 71.0 |
| 3579 | 3B | 55775 | IWB55775 | RAC875_c25305_754           | 71.0 |
| 3580 | 3B | 79625 | IWA5787  | wsnp_JD_c119_190079         | 71.0 |
| 3581 | 3B | 73922 | IWB73922 | Tdurum_contig94838_196      | 71.0 |
| 3582 | 3B | 73051 | IWB73051 | Tdurum_contig6693_787       | 71.0 |
| 3583 | 3B | 967   | IWB967   | BobWhite_c16847_343         | 71.5 |
| 3584 | 3B | 968   | IWB968   | BobWhite_c16847_99          | 71.5 |
| 3585 | 3B | 35464 | IWB35464 | IAAV8368                    | 71.5 |
| 3586 | 3B | 45079 | IWB45079 | Kukri_c40909_784            | 71.8 |
| 3587 | 3B | 54463 | IWB54463 | RAC875_c17404_1160          | 72.1 |
| 3588 | 3B | 28234 | IWB28234 | Excalibur_c63730_660        | 72.1 |
| 3589 | 3B | 49980 | IWB49980 | Kukri_rep_c70097_286        | 72.1 |
| 3590 | 3B | 1448  | IWB1448  | BobWhite_c20876_475         | 72.4 |
| 3591 | 3B | 13654 | IWB13654 | CAP12_rep_c7901_114         | 72.4 |
| 3592 | 3B | 72454 | IWB72454 | Tdurum_contig55486_333      | 72.6 |
| 3593 | 3B | 72453 | IWB72453 | Tdurum_contig55486_176      | 72.6 |
| 3594 | 3B | 8550  | IWB8550  | BS00049639_51               | 72.6 |
| 3595 | 3B | 10591 | IWB10591 | BS00072151_51               | 72.6 |
| 3596 | 3B | 41807 | IWB41807 | Kukri_c17718_145            | 72.6 |
| 3597 | 3B | 36726 | IWB36726 | Jagger_c7188_67             | 73.2 |
| 3598 | 3B | 53943 | IWB53943 | RAC875_c14529_815           | 73.2 |
| 3599 | 3B | 77088 | IWA2494  | wsnp_Ex_c19994_29025586     | 73.2 |
| 3600 | 3B | 5831  | IWB5831  | BS00003522_51               | 73.2 |
| 3601 | 3B | 66740 | IWB66740 | Tdurum_contig10786_280      | 73.2 |
| 3602 | 3B | 64939 | IWB64939 | RFL_Contig5246_1091         | 73.5 |
| 3603 | 3B | 32652 | IWB32652 | GENE-1781_719               | 73.5 |
| 3604 | 3B | 64191 | IWB64191 | RFL_Contig304_729           | 73.7 |
| 3605 | 3B | 81502 | IWA8480  | wsnp_RFL_Contig3529_3696847 | 73.7 |
| 3606 | 3B | 77452 | IWA3000  | wsnp_Ex_c2580_4800027       | 74.0 |
| 3607 | 3B | 40103 | IWB40103 | Ku_c8631_308                | 74.0 |
| 3608 | 3B | 80906 | IWA7595  | wsnp_Ra_c12935_20587578     | 74.0 |
| 3609 | 3B | 80299 | IWA6793  | wsnp_Ku_c26257_36216869     | 74.0 |
| 3610 | 3B | 76269 | IWA1449  | wsnp_Ex_c1116_2138756       | 74.0 |
| 3611 | 3B | 236   | IWB236   | BobWhite_c11540_60          | 74.0 |
| 3612 | 3B | 80300 | IWA6794  | wsnp_Ku_c26257_36216976     | 74.0 |
| 3613 | 3B | 24866 | IWB24866 | Excalibur_c29625_222        | 74.5 |

|      |    |       |          |                           |      |
|------|----|-------|----------|---------------------------|------|
| 3614 | 3B | 24867 | IWB24867 | Excalibur_c29625_243      | 74.5 |
| 3615 | 3B | 30529 | IWB30529 | Excalibur_rep_c111297_98  | 74.5 |
| 3616 | 3B | 49991 | IWB49991 | Kukri_rep_c70198_1436     | 74.5 |
| 3617 | 3B | 77752 | IWA3383  | wsnp_Ex_c3227_5948436     | 74.5 |
| 3618 | 3B | 28828 | IWB28828 | Excalibur_c77101_90       | 74.5 |
| 3619 | 3B | 79820 | IWA6086  | wsnp_JD_c5067_6187376     | 74.5 |
| 3620 | 3B | 81130 | IWA7905  | wsnp_Ra_c38981_46788555   | 74.5 |
| 3621 | 3B | 677   | IWB677   | BobWhite_c14606_452       | 74.5 |
| 3622 | 3B | 22863 | IWB22863 | Excalibur_c16842_743      | 74.5 |
| 3623 | 3B | 4228  | IWB4228  | BobWhite_c6740_481        | 74.5 |
| 3624 | 3B | 35700 | IWB35700 | IACX11401                 | 74.5 |
| 3625 | 3B | 79685 | IWA5886  | wsnp_JD_c1816_2522844     | 74.5 |
| 3626 | 3B | 63202 | IWB63202 | RAC875_rep_c83245_239     | 74.5 |
| 3627 | 3B | 32748 | IWB32748 | GENE-1966_110             | 74.5 |
| 3628 | 3B | 7782  | IWB7782  | BS00030534_51             | 74.5 |
| 3629 | 3B | 62162 | IWB62162 | RAC875_rep_c112642_422    | 74.5 |
| 3630 | 3B | 76960 | IWA2329  | wsnp_Ex_c18624_27492167   | 74.5 |
| 3631 | 3B | 77451 | IWA2999  | wsnp_Ex_c2580_4799370     | 74.5 |
| 3632 | 3B | 80213 | IWA6677  | wsnp_Ku_c19631_29148397   | 74.5 |
| 3633 | 3B | 35272 | IWB35272 | IAAV6934                  | 74.5 |
| 3634 | 3B | 77453 | IWA3001  | wsnp_Ex_c2580_4800249     | 74.5 |
| 3635 | 3B | 370   | IWB370   | BobWhite_c12457_433       | 74.5 |
| 3636 | 3B | 41868 | IWB41868 | Kukri_c18009_398          | 74.5 |
| 3637 | 3B | 729   | IWB729   | BobWhite_c1499_59         | 74.5 |
| 3638 | 3B | 35074 | IWB35074 | IAAV5687                  | 74.5 |
| 3639 | 3B | 35331 | IWB35331 | IAAV738                   | 74.5 |
| 3640 | 3B | 45112 | IWB45112 | Kukri_c41191_703          | 74.5 |
| 3641 | 3B | 77843 | IWA3504  | wsnp_Ex_c34975_43204180   | 74.5 |
| 3642 | 3B | 7502  | IWB7502  | BS00023645_51             | 74.5 |
| 3643 | 3B | 79903 | IWA6213  | wsnp_JD_c9042_9950637     | 74.5 |
| 3644 | 3B | 66016 | IWB66016 | TA005793-0515             | 74.5 |
| 3645 | 3B | 24522 | IWB24522 | Excalibur_c27055_1326     | 74.5 |
| 3646 | 3B | 1028  | IWB1028  | BobWhite_c17332_325       | 74.5 |
| 3647 | 3B | 72358 | IWB72358 | Tdurum_contig54463_316    | 74.5 |
| 3648 | 3B | 63776 | IWB63776 | RFL_Contig1945_110        | 74.5 |
| 3649 | 3B | 71036 | IWB71036 | Tdurum_contig42234_6222   | 74.5 |
| 3650 | 3B | 29694 | IWB29694 | Excalibur_rep_c100805_157 | 74.5 |
| 3651 | 3B | 25353 | IWB25353 | Excalibur_c33550_75       | 74.5 |
| 3652 | 3B | 36387 | IWB36387 | IACX9430                  | 74.5 |
| 3653 | 3B | 26271 | IWB26271 | Excalibur_c41752_392      | 74.8 |
| 3654 | 3B | 8716  | IWB8716  | BS00057451_51             | 74.8 |
| 3655 | 3B | 281   | IWB281   | BobWhite_c1196_297        | 75.1 |
| 3656 | 3B | 1846  | IWB1846  | BobWhite_c24718_225       | 75.4 |
| 3657 | 3B | 34827 | IWB34827 | IAAV4105                  | 75.4 |
| 3658 | 3B | 49662 | IWB49662 | Kukri_rep_c114738_144     | 75.4 |
| 3659 | 3B | 77615 | IWA3218  | wsnp_Ex_c2920_5385184     | 75.4 |
| 3660 | 3B | 3471  | IWB3471  | BobWhite_c45623_215       | 75.4 |
| 3661 | 3B | 54999 | IWB54999 | RAC875_c2044_170          | 75.4 |
| 3662 | 3B | 54764 | IWB54764 | RAC875_c19030_112         | 75.4 |
| 3663 | 3B | 3264  | IWB3264  | BobWhite_c42781_98        | 75.4 |
| 3664 | 3B | 65116 | IWB65116 | RFL_Contig5758_757        | 75.4 |
| 3665 | 3B | 73763 | IWB73763 | Tdurum_contig9132_102     | 75.4 |
| 3666 | 3B | 22528 | IWB22528 | Excalibur_c14999_712      | 75.4 |
| 3667 | 3B | 60623 | IWB60623 | RAC875_c8081_435          | 75.4 |

|      |    |       |          |                              |      |
|------|----|-------|----------|------------------------------|------|
| 3668 | 3B | 58223 | IWB58223 | RAC875_c46237_294            | 75.4 |
| 3669 | 3B | 71417 | IWB71417 | Tdurum_contig43378_256       | 75.4 |
| 3670 | 3B | 4085  | IWB4085  | BobWhite_c609_414            | 75.4 |
| 3671 | 3B | 67789 | IWB67789 | Tdurum_contig12941_1413      | 75.4 |
| 3672 | 3B | 75767 | IWA611   | wsnp_BQ159467B_Ta_2_2        | 75.4 |
| 3673 | 3B | 52943 | IWB52943 | RAC875_c10203_2620           | 75.4 |
| 3674 | 3B | 75705 | IWA537   | wsnp_BG263758B_Ta_2_1        | 75.4 |
| 3675 | 3B | 7773  | IWB7773  | BS00030430_51                | 75.4 |
| 3676 | 3B | 79651 | IWA5826  | wsnp_JD_c1316_1891903        | 75.4 |
| 3677 | 3B | 75766 | IWA610   | wsnp_BQ159467B_Ta_2_1        | 75.4 |
| 3678 | 3B | 39029 | IWB39029 | Ku_c27771_508                | 75.4 |
| 3679 | 3B | 80863 | IWA7534  | wsnp_Ra_c10203_16850924      | 75.4 |
| 3680 | 3B | 65622 | IWB65622 | TA002954-0682                | 75.4 |
| 3681 | 3B | 65234 | IWB65234 | RFL_Contig622_1601           | 75.4 |
| 3682 | 3B | 26723 | IWB26723 | Excalibur_c46052_695         | 75.4 |
| 3683 | 3B | 18115 | IWB18115 | D_GB5Y7FA02I44NU_340         | 75.6 |
| 3684 | 3B | 56763 | IWB56763 | RAC875_c32792_231            | 75.9 |
| 3685 | 3B | 12064 | IWB12064 | BS00099364_51                | 76.5 |
| 3686 | 3B | 66265 | IWB66265 | Tdurum_contig10107_580       | 76.5 |
| 3687 | 3B | 32129 | IWB32129 | GENE-0875_57                 | 76.7 |
| 3688 | 3B | 4885  | IWB4885  | BobWhite_rep_c50457_813      | 77.0 |
| 3689 | 3B | 9888  | IWB9888  | BS00066804_51                | 77.0 |
| 3690 | 3B | 28145 | IWB28145 | Excalibur_c62737_51          | 77.0 |
| 3691 | 3B | 57968 | IWB57968 | RAC875_c43717_528            | 77.0 |
| 3692 | 3B | 5282  | IWB5282  | BobWhite_rep_c61884_158      | 77.0 |
| 3693 | 3B | 6527  | IWB6527  | BS00012080_51                | 77.0 |
| 3694 | 3B | 27586 | IWB27586 | Excalibur_c55621_291         | 77.0 |
| 3695 | 3B | 32657 | IWB32657 | GENE-1787_339                | 77.0 |
| 3696 | 3B | 52028 | IWB52028 | Ra_c4096_921                 | 77.0 |
| 3697 | 3B | 75950 | IWA898   | wsnp_CAP11_rep_c8708_3760250 | 77.0 |
| 3698 | 3B | 32565 | IWB32565 | GENE-1624_193                | 77.0 |
| 3699 | 3B | 58823 | IWB58823 | RAC875_c52345_1050           | 77.0 |
| 3700 | 3B | 56431 | IWB56431 | RAC875_c30121_270            | 77.0 |
| 3701 | 3B | 12062 | IWB12062 | BS00099331_51                | 77.0 |
| 3702 | 3B | 32566 | IWB32566 | GENE-1624_198                | 77.0 |
| 3703 | 3B | 8616  | IWB8616  | BS00052423_51                | 77.0 |
| 3704 | 3B | 77336 | IWA2841  | wsnp_Ex_c238_460841          | 77.0 |
| 3705 | 3B | 28144 | IWB28144 | Excalibur_c62737_131         | 77.0 |
| 3706 | 3B | 36281 | IWB36281 | IACX8272                     | 77.0 |
| 3707 | 3B | 65080 | IWB65080 | RFL_Contig5682_86            | 77.0 |
| 3708 | 3B | 12345 | IWB12345 | BS00108055_51                | 77.0 |
| 3709 | 3B | 12510 | IWB12510 | BS00110292_51                | 77.0 |
| 3710 | 3B | 11393 | IWB11393 | BS00084911_51                | 77.6 |
| 3711 | 3B | 37751 | IWB37751 | JD_c6678_319                 | 77.6 |
| 3712 | 3B | 62795 | IWB62795 | RAC875_rep_c71561_619        | 77.6 |
| 3713 | 3B | 76978 | IWA2351  | wsnp_Ex_c1878_3541204        | 77.6 |
| 3714 | 3B | 41148 | IWB41148 | Kukri_c14072_188             | 77.6 |
| 3715 | 3B | 60420 | IWB60420 | RAC875_c76448_253            | 77.6 |
| 3716 | 3B | 7785  | IWB7785  | BS00030581_51                | 77.6 |
| 3717 | 3B | 4038  | IWB4038  | BobWhite_c59494_113          | 77.6 |
| 3718 | 3B | 59720 | IWB59720 | RAC875_c62872_293            | 77.6 |
| 3719 | 3B | 10658 | IWB10658 | BS00073304_51                | 77.6 |
| 3720 | 3B | 7784  | IWB7784  | BS00030580_51                | 77.6 |
| 3721 | 3B | 50586 | IWB50586 | Kukri_rep_c99834_188         | 77.6 |

|      |    |       |          |                             |      |
|------|----|-------|----------|-----------------------------|------|
| 3722 | 3B | 28034 | IWB28034 | Excalibur_c61285_135        | 77.6 |
| 3723 | 3B | 3723  | IWB3723  | BobWhite_c5095_634          | 78.4 |
| 3724 | 3B | 8522  | IWB8522  | BS00049008_51               | 78.4 |
| 3725 | 3B | 35680 | IWB35680 | IACX11287                   | 78.7 |
| 3726 | 3B | 26579 | IWB26579 | Excalibur_c44713_137        | 79.2 |
| 3727 | 3B | 27395 | IWB27395 | Excalibur_c53588_215        | 79.2 |
| 3728 | 3B | 11633 | IWB11633 | BS00089956_51               | 79.2 |
| 3729 | 3B | 35908 | IWB35908 | IACX3190                    | 79.2 |
| 3730 | 3B | 53293 | IWB53293 | RAC875_c11254_79            | 79.2 |
| 3731 | 3B | 62238 | IWB62238 | RAC875_rep_c113906_294      | 79.2 |
| 3732 | 3B | 41410 | IWB41410 | Kukri_c15603_1116           | 79.2 |
| 3733 | 3B | 79956 | IWA6297  | wsnp_JD_rep_c63654_40605158 | 79.2 |
| 3734 | 3B | 53292 | IWB53292 | RAC875_c11254_739           | 79.2 |
| 3735 | 3B | 3526  | IWB3526  | BobWhite_c46650_260         | 79.2 |
| 3736 | 3B | 11632 | IWB11632 | BS00089954_51               | 79.2 |
| 3737 | 3B | 60906 | IWB60906 | RAC875_c87788_155           | 79.2 |
| 3738 | 3B | 8347  | IWB8347  | BS00043664_51               | 79.2 |
| 3739 | 3B | 11907 | IWB11907 | BS00094923_51               | 79.2 |
| 3740 | 3B | 45306 | IWB45306 | Kukri_c4310_489             | 79.2 |
| 3741 | 3B | 47760 | IWB47760 | Kukri_c783_1833             | 79.2 |
| 3742 | 3B | 25775 | IWB25775 | Excalibur_c36999_270        | 79.5 |
| 3743 | 3B | 11894 | IWB11894 | BS00094710_51               | 79.5 |
| 3744 | 3B | 6915  | IWB6915  | BS00022122_51               | 79.5 |
| 3745 | 3B | 65624 | IWB65624 | TA002966-0294               | 79.5 |
| 3746 | 3B | 9814  | IWB9814  | BS00066466_51               | 79.5 |
| 3747 | 3B | 48764 | IWB48764 | Kukri_rep_c102334_1871      | 79.5 |
| 3748 | 3B | 80726 | IWA7353  | wsnp_Ku_c93664_84327484     | 79.8 |
| 3749 | 3B | 80246 | IWA6720  | wsnp_Ku_c21818_31604716     | 80.0 |
| 3750 | 3B | 42559 | IWB42559 | Kukri_c21818_519            | 80.0 |
| 3751 | 3B | 6485  | IWB6485  | BS00011869_51               | 80.0 |
| 3752 | 3B | 80488 | IWA7035  | wsnp_Ku_c4078_7436510       | 80.0 |
| 3753 | 3B | 81335 | IWA8196  | wsnp_Ra_rep_c74606_72470419 | 80.3 |
| 3754 | 3B | 80851 | IWA7519  | wsnp_Ku_rep_c73198_72796386 | 80.3 |
| 3755 | 3B | 28943 | IWB28943 | Excalibur_c80041_400        | 80.6 |
| 3756 | 3B | 32489 | IWB32489 | GENE-1455_114               | 80.6 |
| 3757 | 3B | 27350 | IWB27350 | Excalibur_c5298_171         | 80.9 |
| 3758 | 3B | 76727 | IWA2022  | wsnp_Ex_c15399_23662312     | 80.9 |
| 3759 | 3B | 78009 | IWA3710  | wsnp_Ex_c40060_47197384     | 80.9 |
| 3760 | 3B | 78010 | IWA3711  | wsnp_Ex_c40060_47197713     | 80.9 |
| 3761 | 3B | 81532 | IWA8531  | wsnp_RFL_Contig3896_4291652 | 80.9 |
| 3762 | 3B | 79699 | IWA5902  | wsnp_JD_c19725_17732526     | 80.9 |
| 3763 | 3B | 40700 | IWB40700 | Kukri_c11910_445            | 80.9 |
| 3764 | 3B | 1301  | IWB1301  | BobWhite_c19725_1329        | 80.9 |
| 3765 | 3B | 453   | IWB453   | BobWhite_c13099_755         | 81.1 |
| 3766 | 3B | 65004 | IWB65004 | RFL_Contig5418_347          | 81.4 |
| 3767 | 3B | 48415 | IWB48415 | Kukri_c9571_73              | 81.7 |
| 3768 | 3B | 21557 | IWB21557 | Excalibur_c1014_371         | 81.9 |
| 3769 | 3B | 63703 | IWB63703 | RFL_Contig167_504           | 82.2 |
| 3770 | 3B | 36679 | IWB36679 | Jagger_c6272_100            | 82.2 |
| 3771 | 3B | 7902  | IWB7902  | BS00032694_51               | 82.2 |
| 3772 | 3B | 27902 | IWB27902 | Excalibur_c5977_1409        | 82.2 |
| 3773 | 3B | 7903  | IWB7903  | BS00032695_51               | 82.2 |
| 3774 | 3B | 29033 | IWB29033 | Excalibur_c82403_135        | 82.2 |
| 3775 | 3B | 27905 | IWB27905 | Excalibur_c5977_711         | 82.2 |

|      |    |       |          |                              |      |
|------|----|-------|----------|------------------------------|------|
| 3776 | 3B | 75500 | IWA239   | wsnp_BE490744B_Ta_2_2        | 82.2 |
| 3777 | 3B | 65344 | IWB65344 | TA001128-1276                | 82.2 |
| 3778 | 3B | 49738 | IWB49738 | Kukri_rep_c117846_427        | 82.2 |
| 3779 | 3B | 28150 | IWB28150 | Excalibur_c62826_254         | 82.2 |
| 3780 | 3B | 7901  | IWB7901  | BS00032692_51                | 82.2 |
| 3781 | 3B | 27903 | IWB27903 | Excalibur_c5977_383          | 82.2 |
| 3782 | 3B | 59708 | IWB59708 | RAC875_c62713_656            | 82.2 |
| 3783 | 3B | 27904 | IWB27904 | Excalibur_c5977_440          | 82.2 |
| 3784 | 3B | 22603 | IWB22603 | Excalibur_c15332_1194        | 82.5 |
| 3785 | 3B | 54982 | IWB54982 | RAC875_c20275_1619           | 82.5 |
| 3786 | 3B | 81523 | IWA8520  | wsnp_RFL_Contig383_4163148   | 83.0 |
| 3787 | 3B | 65525 | IWB65525 | TA002266-1244                | 83.0 |
| 3788 | 3B | 36652 | IWB36652 | Jagger_c5649_59              | 83.0 |
| 3789 | 3B | 72934 | IWB72934 | Tdurum_contig63110_433       | 83.0 |
| 3790 | 3B | 71967 | IWB71967 | Tdurum_contig49477_187       | 83.0 |
| 3791 | 3B | 78795 | IWA4721  | wsnp_Ex_c7756_13218814       | 83.0 |
| 3792 | 3B | 71876 | IWB71876 | Tdurum_contig48224_272       | 83.0 |
| 3793 | 3B | 28184 | IWB28184 | Excalibur_c6325_949          | 83.0 |
| 3794 | 3B | 6001  | IWB6001  | BS00005265_51                | 83.0 |
| 3795 | 3B | 71969 | IWB71969 | Tdurum_contig49477_548       | 83.0 |
| 3796 | 3B | 10328 | IWB10328 | BS00068494_51                | 83.0 |
| 3797 | 3B | 60466 | IWB60466 | RAC875_c775_1135             | 83.3 |
| 3798 | 3B | 79160 | IWA5178  | wsnp_Ex_rep_c110375_92775402 | 83.6 |
| 3799 | 3B | 81392 | IWA8290  | wsnp_RFL_Contig2073_1317762  | 83.6 |
| 3800 | 3B | 49602 | IWB49602 | Kukri_rep_c113146_128        | 83.6 |
| 3801 | 3B | 80846 | IWA7512  | wsnp_Ku_rep_c72700_72370664  | 83.6 |
| 3802 | 3B | 73084 | IWB73084 | Tdurum_contig67750_272       | 83.6 |
| 3803 | 3B | 77686 | IWA3305  | wsnp_Ex_c3096_5709257        | 83.6 |
| 3804 | 3B | 27739 | IWB27739 | Excalibur_c57658_54          | 83.6 |
| 3805 | 3B | 77685 | IWA3304  | wsnp_Ex_c3096_5708642        | 83.6 |
| 3806 | 3B | 76470 | IWA1704  | wsnp_Ex_c12887_20427158      | 83.6 |
| 3807 | 3B | 77687 | IWA3306  | wsnp_Ex_c3096_5709369        | 83.6 |
| 3808 | 3B | 14043 | IWB14043 | CAP7_c3667_77                | 83.6 |
| 3809 | 3B | 69308 | IWB69308 | Tdurum_contig27495_111       | 83.8 |
| 3810 | 3B | 32559 | IWB32559 | GENE-1617_188                | 84.1 |
| 3811 | 3B | 32558 | IWB32558 | GENE-1617_131                | 84.1 |
| 3812 | 3B | 36233 | IWB36233 | IACX7741                     | 84.4 |
| 3813 | 3B | 71476 | IWB71476 | Tdurum_contig44013_74        | 84.6 |
| 3814 | 3B | 5515  | IWB5515  | BobWhite_rep_c64944_264      | 84.6 |
| 3815 | 3B | 32668 | IWB32668 | GENE-1802_588                | 84.6 |
| 3816 | 3B | 79568 | IWA5710  | wsnp_Ex_rep_c70809_69689636  | 84.6 |
| 3817 | 3B | 47499 | IWB47499 | Kukri_c7087_896              | 84.6 |
| 3818 | 3B | 71475 | IWB71475 | Tdurum_contig44013_164       | 84.6 |
| 3819 | 3B | 77465 | IWA3018  | wsnp_Ex_c2609_4852360        | 84.6 |
| 3820 | 3B | 11721 | IWB11721 | BS00091643_51                | 84.6 |
| 3821 | 3B | 13369 | IWB13369 | CAP12_c3423_116              | 85.2 |
| 3822 | 3B | 1014  | IWB1014  | BobWhite_c17191_297          | 85.5 |
| 3823 | 3B | 53113 | IWB53113 | RAC875_c10595_473            | 85.5 |
| 3824 | 3B | 44412 | IWB44412 | Kukri_c35105_294             | 85.5 |
| 3825 | 3B | 63113 | IWB63113 | RAC875_rep_c77684_470        | 85.7 |
| 3826 | 3B | 79863 | IWA6158  | wsnp_JD_c6974_8084752        | 85.7 |
| 3827 | 3B | 58449 | IWB58449 | RAC875_c48556_278            | 85.7 |
| 3828 | 3B | 8029  | IWB8029  | BS00035878_51                | 86.0 |
| 3829 | 3B | 74291 | IWB74291 | tplb0026h15_986              | 86.0 |

|      |    |       |          |                              |      |
|------|----|-------|----------|------------------------------|------|
| 3830 | 3B | 71944 | IWB71944 | Tdurum_contig49052_223       | 86.0 |
| 3831 | 3B | 72547 | IWB72547 | Tdurum_contig57086_66        | 86.0 |
| 3832 | 3B | 72215 | IWB72215 | Tdurum_contig51903_680       | 86.0 |
| 3833 | 3B | 71336 | IWB71336 | Tdurum_contig42711_1483      | 86.0 |
| 3834 | 3B | 23665 | IWB23665 | Excalibur_c21604_247         | 86.0 |
| 3835 | 3B | 58033 | IWB58033 | RAC875_c44290_511            | 86.6 |
| 3836 | 3B | 9686  | IWB9686  | BS00065978_51                | 86.6 |
| 3837 | 3B | 44885 | IWB44885 | Kukri_c39081_265             | 86.6 |
| 3838 | 3B | 11998 | IWB11998 | BS00097383_51                | 86.6 |
| 3839 | 3B | 75879 | IWA773   | wsnp_CAP11_c530_369045       | 86.6 |
| 3840 | 3B | 80565 | IWA7131  | wsnp_Ku_c50833_56310020      | 87.1 |
| 3841 | 3B | 79148 | IWA5165  | wsnp_Ex_rep_c108114_91468537 | 87.4 |
| 3842 | 3B | 42741 | IWB42741 | Kukri_c2306_333              | 88.2 |
| 3843 | 3B | 9451  | IWB9451  | BS00065107_51                | 89.3 |
| 3844 | 3B | 57562 | IWB57562 | RAC875_c39926_313            | 89.3 |
| 3845 | 3B | 11501 | IWB11501 | BS00087427_51                | 89.3 |
| 3846 | 3B | 77099 | IWA2510  | wsnp_Ex_c20168_29214721      | 89.3 |
| 3847 | 3B | 9408  | IWB9408  | BS00064940_51                | 89.3 |
| 3848 | 3B | 76813 | IWA2124  | wsnp_Ex_c16378_24870688      | 89.6 |
| 3849 | 3B | 77014 | IWA2399  | wsnp_Ex_c1934_3648048        | 89.6 |
| 3850 | 3B | 54259 | IWB54259 | RAC875_c16281_167            | 89.6 |
| 3851 | 3B | 54327 | IWB54327 | RAC875_c16628_500            | 89.8 |
| 3852 | 3B | 76181 | IWA1334  | wsnp_Ex_c10499_17163260      | 90.1 |
| 3853 | 3B | 76985 | IWA2361  | wsnp_Ex_c18926_27825028      | 90.1 |
| 3854 | 3B | 68357 | IWB68357 | Tdurum_contig15150_2456      | 90.1 |
| 3855 | 3B | 7020  | IWB7020  | BS00022316_51                | 90.1 |
| 3856 | 3B | 81296 | IWA8137  | wsnp_Ra_rep_c108411_91697852 | 90.1 |
| 3857 | 3B | 76179 | IWA1332  | wsnp_Ex_c10499_17162550      | 90.1 |
| 3858 | 3B | 36290 | IWB36290 | IACX8336                     | 90.4 |
| 3859 | 3B | 55620 | IWB55620 | RAC875_c24267_258            | 90.4 |
| 3860 | 3B | 55621 | IWB55621 | RAC875_c24267_775            | 90.4 |
| 3861 | 3B | 80124 | IWA6552  | wsnp_Ku_c15149_23666345      | 90.4 |
| 3862 | 3B | 76180 | IWA1333  | wsnp_Ex_c10499_17162700      | 90.4 |
| 3863 | 3B | 23227 | IWB23227 | Excalibur_c18926_174         | 90.4 |
| 3864 | 3B | 76875 | IWA2204  | wsnp_Ex_c17303_25979191      | 90.4 |
| 3865 | 3B | 53106 | IWB53106 | RAC875_c1057_224             | 90.4 |
| 3866 | 3B | 12186 | IWB12186 | BS00102326_51                | 90.4 |
| 3867 | 3B | 77765 | IWA3402  | wsnp_Ex_c3257_6003626        | 90.4 |
| 3868 | 3B | 76178 | IWA1331  | wsnp_Ex_c10499_17161734      | 90.4 |
| 3869 | 3B | 58890 | IWB58890 | RAC875_c530_354              | 90.4 |
| 3870 | 3B | 20034 | IWB20034 | Ex_c18926_626                | 90.4 |
| 3871 | 3B | 81295 | IWA8136  | wsnp_Ra_rep_c108411_91697657 | 90.4 |
| 3872 | 3B | 81104 | IWA7870  | wsnp_Ra_c3289_6166914        | 90.4 |
| 3873 | 3B | 25163 | IWB25163 | Excalibur_c31960_1492        | 90.4 |
| 3874 | 3B | 24338 | IWB24338 | Excalibur_c25567_225         | 90.4 |
| 3875 | 3B | 77920 | IWA3601  | wsnp_Ex_c3722_6786328        | 90.4 |
| 3876 | 3B | 12466 | IWB12466 | BS00110072_51                | 90.4 |
| 3877 | 3B | 78969 | IWA4942  | wsnp_Ex_c9594_15882022       | 90.6 |
| 3878 | 3B | 7145  | IWB7145  | BS00022540_51                | 90.6 |
| 3879 | 3B | 77255 | IWA2721  | wsnp_Ex_c2250_4216508        | 90.6 |
| 3880 | 3B | 65507 | IWB65507 | TA002179-0963                | 90.9 |
| 3881 | 3B | 2290  | IWB2290  | BobWhite_c29647_243          | 91.2 |
| 3882 | 3B | 7617  | IWB7617  | BS00026264_51                | 91.2 |
| 3883 | 3B | 34730 | IWB34730 | IAAV3519                     | 91.2 |



|      |    |       |          |                             |      |
|------|----|-------|----------|-----------------------------|------|
| 3884 | 3B | 7838  | IWB7838  | BS00031402_51               | 91.2 |
| 3885 | 3B | 69866 | IWB69866 | Tdurum_contig297_200        | 91.2 |
| 3886 | 3B | 8515  | IWB8515  | BS00048754_51               | 91.2 |
| 3887 | 3B | 77918 | IWA3598  | wsnp_Ex_c37115_44930934     | 91.2 |
| 3888 | 3B | 38582 | IWB38582 | Ku_c172_840                 | 91.2 |
| 3889 | 3B | 11839 | IWB11839 | BS00093892_51               | 91.5 |
| 3890 | 3B | 54174 | IWB54174 | RAC875_c15889_109           | 92.0 |
| 3891 | 3B | 35427 | IWB35427 | IAAV8080                    | 92.3 |
| 3892 | 3B | 5637  | IWB5637  | BobWhite_rep_c66990_294     | 92.3 |
| 3893 | 3B | 44729 | IWB44729 | Kukri_c37735_131            | 92.3 |
| 3894 | 3B | 6077  | IWB6077  | BS00009549_51               | 92.3 |
| 3895 | 3B | 8984  | IWB8984  | BS00063034_51               | 92.3 |
| 3896 | 3B | 1827  | IWB1827  | BobWhite_c24457_126         | 92.3 |
| 3897 | 3B | 53503 | IWB53503 | RAC875_c12200_57            | 92.3 |
| 3898 | 3B | 41274 | IWB41274 | Kukri_c14832_407            | 92.3 |
| 3899 | 3B | 9529  | IWB9529  | BS00065376_51               | 92.3 |
| 3900 | 3B | 9522  | IWB9522  | BS00065348_51               | 92.3 |
| 3901 | 3B | 38313 | IWB38313 | Ku_c12345_328               | 92.3 |
| 3902 | 3B | 24193 | IWB24193 | Excalibur_c24617_131        | 92.3 |
| 3903 | 3B | 4320  | IWB4320  | BobWhite_c7281_328          | 92.3 |
| 3904 | 3B | 5635  | IWB5635  | BobWhite_rep_c66990_212     | 92.3 |
| 3905 | 3B | 52107 | IWB52107 | Ra_c44591_213               | 92.3 |
| 3906 | 3B | 55956 | IWB55956 | RAC875_c26639_367           | 92.3 |
| 3907 | 3B | 26853 | IWB26853 | Excalibur_c47250_726        | 92.3 |
| 3908 | 3B | 11298 | IWB11298 | BS00083391_51               | 92.3 |
| 3909 | 3B | 20294 | IWB20294 | Ex_c25520_449               | 92.3 |
| 3910 | 3B | 23085 | IWB23085 | Excalibur_c18172_2105       | 92.3 |
| 3911 | 3B | 26778 | IWB26778 | Excalibur_c46437_169        | 92.3 |
| 3912 | 3B | 29288 | IWB29288 | Excalibur_c8998_469         | 92.3 |
| 3913 | 3B | 54326 | IWB54326 | RAC875_c16625_182           | 92.3 |
| 3914 | 3B | 68    | IWB68    | BobWhite_c10476_790         | 92.3 |
| 3915 | 3B | 75839 | IWA714   | wsnp_CAP11_c2309_1201554    | 92.3 |
| 3916 | 3B | 79958 | IWA6299  | wsnp_JD_rep_c63810_40704815 | 92.3 |
| 3917 | 3B | 79990 | IWA6375  | wsnp_Ku_c10196_16926860     | 92.3 |
| 3918 | 3B | 1639  | IWB1639  | BobWhite_c22794_111         | 92.6 |
| 3919 | 3B | 13058 | IWB13058 | CAP11_c797_273              | 92.6 |
| 3920 | 3B | 25978 | IWB25978 | Excalibur_c38785_222        | 92.6 |
| 3921 | 3B | 22644 | IWB22644 | Excalibur_c15516_1105       | 92.6 |
| 3922 | 3B | 51751 | IWB51751 | Ra_c29672_532               | 92.6 |
| 3923 | 3B | 80882 | IWA7561  | wsnp_Ra_c11243_18269800     | 92.6 |
| 3924 | 3B | 3110  | IWB3110  | BobWhite_c40305_243         | 92.6 |
| 3925 | 3B | 76690 | IWA1974  | wsnp_Ex_c15047_23217632     | 92.6 |
| 3926 | 3B | 80118 | IWA6542  | wsnp_Ku_c14875_23320708     | 92.6 |
| 3927 | 3B | 75414 | IWA125   | wsnp_BE443288B-Ta_2_1       | 92.6 |
| 3928 | 3B | 51749 | IWB51749 | Ra_c29672_518               | 92.6 |
| 3929 | 3B | 27888 | IWB27888 | Excalibur_c59479_514        | 92.6 |
| 3930 | 3B | 76848 | IWA2167  | wsnp_Ex_c1676_3185400       | 92.6 |
| 3931 | 3B | 55101 | IWB55101 | RAC875_c20973_109           | 92.6 |
| 3932 | 3B | 54439 | IWB54439 | RAC875_c17269_541           | 92.6 |
| 3933 | 3B | 33456 | IWB33456 | GENE-3543_165               | 92.6 |
| 3934 | 3B | 49175 | IWB49175 | Kukri_rep_c106420_312       | 92.6 |
| 3935 | 3B | 49708 | IWB49708 | Kukri_rep_c116233_130       | 92.6 |
| 3936 | 3B | 76760 | IWA2063  | wsnp_Ex_c15795_24169367     | 92.6 |
| 3937 | 3B | 76453 | IWA1683  | wsnp_Ex_c12781_20280572     | 92.6 |

|      |    |       |          |                             |      |
|------|----|-------|----------|-----------------------------|------|
| 3938 | 3B | 54440 | IWB54440 | RAC875_c17269_645           | 92.6 |
| 3939 | 3B | 79678 | IWA5871  | wsnp_JD_c16245_15468917     | 93.4 |
| 3940 | 3B | 56230 | IWB56230 | RAC875_c2879_2784           | 93.4 |
| 3941 | 3B | 50871 | IWB50871 | Ra_c109604_751              | 93.4 |
| 3942 | 3B | 77976 | IWA3669  | wsnp_Ex_c39124_46489956     | 93.4 |
| 3943 | 3B | 12192 | IWB12192 | BS00102641_51               | 93.7 |
| 3944 | 3B | 6203  | IWB6203  | BS00010316_51               | 93.9 |
| 3945 | 3B | 4750  | IWB4750  | BobWhite_rep_c49274_425     | 93.9 |
| 3946 | 3B | 12008 | IWB12008 | BS00097541_51               | 93.9 |
| 3947 | 3B | 35905 | IWB35905 | IACX3169                    | 93.9 |
| 3948 | 3B | 59283 | IWB59283 | RAC875_c5739_1262           | 93.9 |
| 3949 | 3B | 14496 | IWB14496 | CAP8_c1113_199              | 93.9 |
| 3950 | 3B | 32512 | IWB32512 | GENE-1511_622               | 93.9 |
| 3951 | 3B | 51746 | IWB51746 | Ra_c2964_1897               | 93.9 |
| 3952 | 3B | 51747 | IWB51747 | Ra_c2964_2254               | 93.9 |
| 3953 | 3B | 38502 | IWB38502 | Ku_c1575_338                | 93.9 |
| 3954 | 3B | 81506 | IWA8490  | wsnp_RFL_Contig3599_3786631 | 93.9 |
| 3955 | 3B | 2271  | IWB2271  | BobWhite_c2937_1426         | 93.9 |
| 3956 | 3B | 65497 | IWB65497 | TA002089-1495               | 93.9 |
| 3957 | 3B | 6868  | IWB6868  | BS00022025_51               | 93.9 |
| 3958 | 3B | 38503 | IWB38503 | Ku_c1575_485                | 93.9 |
| 3959 | 3B | 13886 | IWB13886 | CAP7_c2116_545              | 93.9 |
| 3960 | 3B | 23301 | IWB23301 | Excalibur_c19367_76         | 93.9 |
| 3961 | 3B | 80965 | IWA7679  | wsnp_Ra_c18164_27178459     | 93.9 |
| 3962 | 3B | 80966 | IWA7680  | wsnp_Ra_c18164_27178535     | 93.9 |
| 3963 | 3B | 68888 | IWB68888 | Tdurum_contig20632_210      | 93.9 |
| 3964 | 3B | 76498 | IWA1733  | wsnp_Ex_c13154_20785032     | 94.5 |
| 3965 | 3B | 78610 | IWA4497  | wsnp_Ex_c64005_62986957     | 94.5 |
| 3966 | 3B | 78611 | IWA4499  | wsnp_Ex_c64005_62987067     | 94.5 |
| 3967 | 3B | 79280 | IWA5324  | wsnp_Ex_rep_c66893_65301351 | 94.5 |
| 3968 | 3B | 34933 | IWB34933 | IAAV4835                    | 94.5 |
| 3969 | 3B | 62628 | IWB62628 | RAC875_rep_c69917_755       | 94.5 |
| 3970 | 3B | 76497 | IWA1732  | wsnp_Ex_c13154_20784674     | 94.5 |
| 3971 | 3B | 24723 | IWB24723 | Excalibur_c2850_126         | 94.7 |
| 3972 | 3B | 31908 | IWB31908 | GENE-0477_338               | 94.7 |
| 3973 | 3B | 62468 | IWB62468 | RAC875_rep_c118396_333      | 94.7 |
| 3974 | 3B | 24537 | IWB24537 | Excalibur_c27120_789        | 94.7 |
| 3975 | 3B | 62411 | IWB62411 | RAC875_rep_c117294_342      | 94.7 |
| 3976 | 3B | 79420 | IWA5510  | wsnp_Ex_rep_c68193_66971396 | 94.7 |
| 3977 | 3B | 9581  | IWB9581  | BS00065553_51               | 94.7 |
| 3978 | 3B | 25571 | IWB25571 | Excalibur_c35203_334        | 97.0 |
| 3979 | 3B | 60236 | IWB60236 | RAC875_c69_499              | 97.0 |
| 3980 | 3B | 67684 | IWB67684 | Tdurum_contig12643_514      | 97.3 |
| 3981 | 3B | 47171 | IWB47171 | Kukri_c64639_120            | 97.8 |
| 3982 | 3B | 2844  | IWB2844  | BobWhite_c36548_98          | 97.8 |
| 3983 | 3B | 9227  | IWB9227  | BS00064218_51               | 97.8 |
| 3984 | 3B | 25321 | IWB25321 | Excalibur_c33274_498        | 97.8 |
| 3985 | 3B | 67701 | IWB67701 | Tdurum_contig12682_421      | 97.8 |
| 3986 | 3B | 67103 | IWB67103 | Tdurum_contig11443_978      | 97.8 |
| 3987 | 3B | 57820 | IWB57820 | RAC875_c42186_335           | 97.8 |
| 3988 | 3B | 52444 | IWB52444 | Ra_c69_1443                 | 97.8 |
| 3989 | 3B | 60234 | IWB60234 | RAC875_c69_1583             | 97.8 |
| 3990 | 3B | 81236 | IWA8054  | wsnp_Ra_c69_149518          | 97.8 |
| 3991 | 3B | 77709 | IWA3330  | wsnp_Ex_c3130_5789791       | 97.8 |

|      |    |       |          |                          |       |
|------|----|-------|----------|--------------------------|-------|
| 3992 | 3B | 81235 | IWA8053  | wsnp_Ra_c69_149394       | 97.8  |
| 3993 | 3B | 77711 | IWA3332  | wsnp_Ex_c3130_5790163    | 97.8  |
| 3994 | 3B | 77710 | IWA3331  | wsnp_Ex_c3130_5789888    | 97.8  |
| 3995 | 3B | 60237 | IWB60237 | RAC875_c69_717           | 97.8  |
| 3996 | 3B | 51093 | IWB51093 | Ra_c14132_2575           | 97.8  |
| 3997 | 3B | 60235 | IWB60235 | RAC875_c69_392           | 97.8  |
| 3998 | 3B | 35001 | IWB35001 | IAAV5302                 | 97.8  |
| 3999 | 3B | 51094 | IWB51094 | Ra_c14132_2930           | 97.8  |
| 4000 | 3B | 67102 | IWB67102 | Tdurum_contig11443_1022  | 97.8  |
| 4001 | 3B | 51903 | IWB51903 | Ra_c35_3184              | 98.4  |
| 4002 | 3B | 8244  | IWB8244  | BS00040742_51            | 98.9  |
| 4003 | 3B | 45104 | IWB45104 | Kukri_c41129_344         | 100.4 |
| 4004 | 3B | 38921 | IWB38921 | Ku_c24974_674            | 100.4 |
| 4005 | 3B | 32805 | IWB32805 | GENE-2105_409            | 100.4 |
| 4006 | 3B | 53593 | IWB53593 | RAC875_c12801_410        | 100.9 |
| 4007 | 3B | 12530 | IWB12530 | BS00110416_51            | 100.9 |
| 4008 | 3B | 72180 | IWB72180 | Tdurum_contig51386_128   | 100.9 |
| 4009 | 3B | 2774  | IWB2774  | BobWhite_c35398_181      | 100.9 |
| 4010 | 3B | 9005  | IWB9005  | BS00063105_51            | 100.9 |
| 4011 | 3B | 70345 | IWB70345 | Tdurum_contig32277_121   | 100.9 |
| 4012 | 3B | 11409 | IWB11409 | BS00085434_51            | 100.9 |
| 4013 | 3B | 73555 | IWB73555 | Tdurum_contig82231_204   | 101.2 |
| 4014 | 3B | 11997 | IWB11997 | BS00097374_51            | 101.2 |
| 4015 | 3B | 71098 | IWB71098 | Tdurum_contig42366_944   | 101.2 |
| 4016 | 3B | 71096 | IWB71096 | Tdurum_contig42366_818   | 101.2 |
| 4017 | 3B | 71097 | IWB71097 | Tdurum_contig42366_893   | 101.2 |
| 4018 | 3B | 59671 | IWB59671 | RAC875_c62223_86         | 101.2 |
| 4019 | 3B | 31458 | IWB31458 | Excalibur_rep_c97324_623 | 102.0 |
| 4020 | 3B | 23681 | IWB23681 | Excalibur_c21708_555     | 102.3 |
| 4021 | 3B | 8730  | IWB8730  | BS00057988_51            | 102.8 |
| 4022 | 3B | 71664 | IWB71664 | Tdurum_contig46030_580   | 104.0 |
| 4023 | 3B | 9095  | IWB9095  | BS00063624_51            | 104.0 |
| 4024 | 3B | 48982 | IWB48982 | Kukri_rep_c104399_156    | 104.8 |
| 4025 | 3B | 58482 | IWB58482 | RAC875_c48868_558        | 104.8 |
| 4026 | 3B | 7789  | IWB7789  | BS00030651_51            | 104.8 |
| 4027 | 3B | 44099 | IWB44099 | Kukri_c3243_1065         | 105.1 |
| 4028 | 3B | 2891  | IWB2891  | BobWhite_c3721_78        | 105.1 |
| 4029 | 3B | 2890  | IWB2890  | BobWhite_c3721_224       | 105.1 |
| 4030 | 3B | 81227 | IWA8043  | wsnp_Ra_c67016_65144188  | 105.1 |
| 4031 | 3B | 72728 | IWB72728 | Tdurum_contig60330_126   | 105.1 |
| 4032 | 3B | 44098 | IWB44098 | Kukri_c3243_1016         | 105.1 |
| 4033 | 3B | 52781 | IWB52781 | Ra_c8960_147             | 105.1 |
| 4034 | 3B | 10030 | IWB10030 | BS00067355_51            | 109.3 |
| 4035 | 3B | 7609  | IWB7609  | BS00026064_51            | 114.9 |
| 4036 | 3B | 7539  | IWB7539  | BS00024496_51            | 114.9 |
| 4037 | 3B | 5646  | IWB5646  | BobWhite_rep_c67281_115  | 114.9 |
| 4038 | 3B | 2509  | IWB2509  | BobWhite_c3200_1003      | 114.9 |
| 4039 | 3B | 7540  | IWB7540  | BS00024499_51            | 114.9 |
| 4040 | 3B | 53154 | IWB53154 | RAC875_c10710_87         | 114.9 |
| 4041 | 3B | 61285 | IWB61285 | RAC875_c9930_191         | 114.9 |
| 4042 | 3B | 80870 | IWA7542  | wsnp_Ra_c10710_17570054  | 114.9 |
| 4043 | 3B | 77805 | IWA3454  | wsnp_Ex_c33879_42293206  | 117.0 |
| 4044 | 3B | 63997 | IWB63997 | RFL_Contig2578_862       | 117.0 |
| 4045 | 3B | 75889 | IWA785   | wsnp_CAP11_c59_99317     | 117.2 |

|      |    |       |          |                        |       |
|------|----|-------|----------|------------------------|-------|
| 4046 | 3B | 14720 | IWB14720 | CAP8_c42_161           | 117.2 |
| 4047 | 3B | 8700  | IWB8700  | BS00056737_51          | 117.2 |
| 4048 | 3B | 75890 | IWA786   | wsnp_CAP11_c59_99702   | 117.2 |
| 4049 | 3B | 47870 | IWB47870 | Kukri_c8099_1522       | 117.2 |
| 4050 | 3B | 42624 | IWB42624 | Kukri_c2227_583        | 117.2 |
| 4051 | 3B | 75891 | IWA787   | wsnp_CAP11_c59_99769   | 117.2 |
| 4052 | 3B | 48304 | IWB48304 | Kukri_c9256_1485       | 117.2 |
| 4053 | 3B | 55721 | IWB55721 | RAC875_c24972_708      | 117.2 |
| 4054 | 3B | 12975 | IWB12975 | CAP11_c59_418          | 117.2 |
| 4055 | 3B | 66054 | IWB66054 | TA006103-0916          | 117.5 |
| 4056 | 3B | 10390 | IWB10390 | BS00069273_51          | 117.8 |
| 4057 | 3B | 9228  | IWB9228  | BS00064227_51          | 117.8 |
| 4058 | 3B | 9115  | IWB9115  | BS00063711_51          | 121.4 |
| 4059 | 3B | 32587 | IWB32587 | GENE-1662_108          | 121.7 |
| 4060 | 3B | 3779  | IWB3779  | BobWhite_c5276_631     | 121.7 |
| 4061 | 3B | 26933 | IWB26933 | Excalibur_c4821_1561   | 123.4 |
| 4062 | 3B | 1543  | IWB1543  | BobWhite_c22016_155    | 123.4 |
| 4063 | 3B | 25460 | IWB25460 | Excalibur_c34433_220   | 123.4 |
| 4064 | 3B | 6624  | IWB6624  | BS00015891_51          | 123.4 |
| 4065 | 3B | 68336 | IWB68336 | Tdurum_contig15050_103 | 123.4 |
| 4066 | 3B | 14554 | IWB14554 | CAP8_c1657_183         | 129.5 |
| 4067 | 3B | 73903 | IWB73903 | Tdurum_contig94100_214 | 129.5 |
| 4068 | 3B | 24432 | IWB24432 | Excalibur_c26349_503   | 129.5 |
| 4069 | 3B | 74075 | IWB74075 | Tdurum_contig99764_256 | 129.5 |
| 4070 | 3B | 33033 | IWB33033 | GENE-2712_428          | 129.5 |
| 4071 | 3B | 22558 | IWB22558 | Excalibur_c15095_852   | 129.5 |
| 4072 | 3B | 73670 | IWB73670 | Tdurum_contig84676_145 | 129.5 |
| 4073 | 3B | 69415 | IWB69415 | Tdurum_contig28053_218 | 129.5 |
| 4074 | 3B | 10521 | IWB10521 | BS00071041_51          | 129.5 |
| 4075 | 3B | 33031 | IWB33031 | GENE-2712_367          | 129.5 |
| 4076 | 3B | 32925 | IWB32925 | GENE-2405_488          | 129.5 |
| 4077 | 3B | 72293 | IWB72293 | Tdurum_contig52980_116 | 129.5 |
| 4078 | 3B | 74074 | IWB74074 | Tdurum_contig99764_139 | 129.5 |
| 4079 | 3B | 74076 | IWB74076 | Tdurum_contig99764_60  | 129.5 |
| 4080 | 3B | 73988 | IWB73988 | Tdurum_contig9738_262  | 130.7 |
| 4081 | 3B | 67339 | IWB67339 | Tdurum_contig11881_425 | 133.9 |
| 4082 | 3B | 44195 | IWB44195 | Kukri_c33386_112       | 135.9 |
| 4083 | 3B | 70167 | IWB70167 | Tdurum_contig31097_254 | 136.2 |
| 4084 | 3B | 1858  | IWB1858  | BobWhite_c2486_239     | 136.5 |
| 4085 | 3B | 53715 | IWB53715 | RAC875_c13406_65       | 136.5 |
| 4086 | 3B | 57141 | IWB57141 | RAC875_c35955_210      | 136.5 |
| 4087 | 3B | 42423 | IWB42423 | Kukri_c21041_263       | 136.5 |
| 4088 | 3B | 53714 | IWB53714 | RAC875_c13406_329      | 136.5 |
| 4089 | 3B | 71781 | IWB71781 | Tdurum_contig47292_302 | 136.8 |
| 4090 | 3B | 29374 | IWB29374 | Excalibur_c91987_69    | 138.8 |
| 4091 | 3B | 33965 | IWB33965 | GENE-4458_709          | 138.8 |
| 4092 | 3B | 45212 | IWB45212 | Kukri_c42197_634       | 138.8 |
| 4093 | 3B | 36533 | IWB36533 | Jagger_c3292_145       | 138.8 |
| 4094 | 3B | 28240 | IWB28240 | Excalibur_c63859_285   | 138.8 |
| 4095 | 3B | 44970 | IWB44970 | Kukri_c39915_386       | 138.8 |
| 4096 | 3B | 44969 | IWB44969 | Kukri_c39915_340       | 138.8 |
| 4097 | 3B | 8385  | IWB8385  | BS00044955_51          | 138.8 |
| 4098 | 3B | 8382  | IWB8382  | BS00044942_51          | 138.8 |
| 4099 | 3B | 53689 | IWB53689 | RAC875_c13256_1359     | 138.8 |

|      |    |       |          |                             |       |
|------|----|-------|----------|-----------------------------|-------|
| 4100 | 3B | 55994 | IWB55994 | RAC875_c26839_63            | 138.8 |
| 4101 | 3B | 9386  | IWB9386  | BS00064875_51               | 138.8 |
| 4102 | 3B | 10672 | IWB10672 | BS00073480_51               | 138.8 |
| 4103 | 3B | 49297 | IWB49297 | Kukri_rep_c107896_90        | 138.8 |
| 4104 | 3B | 8383  | IWB8383  | BS00044944_51               | 138.8 |
| 4105 | 3B | 48859 | IWB48859 | Kukri_rep_c103205_101       | 138.8 |
| 4106 | 3B | 45539 | IWB45539 | Kukri_c45513_83             | 138.8 |
| 4107 | 3B | 27534 | IWB27534 | Excalibur_c55096_613        | 138.8 |
| 4108 | 3B | 28241 | IWB28241 | Excalibur_c63859_401        | 138.8 |
| 4109 | 3B | 67247 | IWB67247 | Tdurum_contig11705_400      | 138.8 |
| 4110 | 3B | 75436 | IWA150   | wsnp_BE444579B_Ta_2_2       | 138.8 |
| 4111 | 3B | 8949  | IWB8949  | BS00062914_51               | 139.4 |
| 4112 | 3B | 53720 | IWB53720 | RAC875_c13425_393           | 139.7 |
| 4113 | 3B | 59724 | IWB59724 | RAC875_c6293_237            | 139.7 |
| 4114 | 3B | 10839 | IWB10839 | BS00075879_51               | 139.9 |
| 4115 | 3B | 32732 | IWB32732 | GENE-1925_447               | 140.2 |
| 4116 | 3B | 11049 | IWB11049 | BS00079029_51               | 140.2 |
| 4117 | 3B | 43749 | IWB43749 | Kukri_c29615_377            | 140.5 |
| 4118 | 3B | 6094  | IWB6094  | BS00009671_51               | 140.8 |
| 4119 | 3B | 40708 | IWB40708 | Kukri_c11944_2358           | 140.8 |
| 4120 | 3B | 5211  | IWB5211  | BobWhite_rep_c58425_117     | 140.8 |
| 4121 | 3B | 4591  | IWB4591  | BobWhite_c9277_295          | 140.8 |
| 4122 | 3B | 57331 | IWB57331 | RAC875_c37741_476           | 140.8 |
| 4123 | 3B | 40707 | IWB40707 | Kukri_c11944_1316           | 140.8 |
| 4124 | 3B | 58810 | IWB58810 | RAC875_c5222_245            | 140.8 |
| 4125 | 3B | 76517 | IWA1756  | wsnp_Ex_c13284_20948460     | 140.8 |
| 4126 | 3B | 57330 | IWB57330 | RAC875_c37741_218           | 140.8 |
| 4127 | 3B | 11701 | IWB11701 | BS00091257_51               | 140.8 |
| 4128 | 3B | 59372 | IWB59372 | RAC875_c58399_104           | 140.8 |
| 4129 | 3B | 4890  | IWB4890  | BobWhite_rep_c50492_500     | 142.6 |
| 4130 | 3B | 34409 | IWB34409 | IAAV1595                    | 142.9 |
| 4131 | 3B | 45892 | IWB45892 | Kukri_c48601_98             | 142.9 |
| 4132 | 3B | 28522 | IWB28522 | Excalibur_c6906_2385        | 142.9 |
| 4133 | 3B | 81341 | IWA8203  | wsnp_Ra_rep_c75740_73183118 | 142.9 |
| 4134 | 3B | 35514 | IWB35514 | IAAV8659                    | 142.9 |
| 4135 | 3B | 11520 | IWB11520 | BS00087694_51               | 145.2 |
| 4136 | 3D | 48159 | IWB48159 | Kukri_c8870_721             | 0.0   |
| 4137 | 3D | 42836 | IWB42836 | Kukri_c23591_522            | 0.6   |
| 4138 | 3D | 8818  | IWB8818  | BS00060773_51               | 2.3   |
| 4139 | 3D | 64234 | IWB64234 | RFL_Contig3158_598          | 4.3   |
| 4140 | 3D | 771   | IWB771   | BobWhite_c1527_257          | 4.3   |
| 4141 | 3D | 42979 | IWB42979 | Kukri_c24488_1603           | 5.1   |
| 4142 | 3D | 40813 | IWB40813 | Kukri_c12401_301            | 8.6   |
| 4143 | 3D | 17932 | IWB17932 | D_GA8KES402JX54D_322        | 11.5  |
| 4144 | 3D | 37161 | IWB37161 | JD_c20427_248               | 18.1  |
| 4145 | 3D | 8376  | IWB8376  | BS00044751_51               | 25.2  |
| 4146 | 3D | 14859 | IWB14859 | CAP8_c6336_351              | 25.2  |
| 4147 | 3D | 66028 | IWB66028 | TA005883-0675               | 26.4  |
| 4148 | 3D | 63958 | IWB63958 | RFL_Contig2471_119          | 26.4  |
| 4149 | 3D | 32647 | IWB32647 | GENE-1771_89                | 26.9  |
| 4150 | 3D | 32645 | IWB32645 | GENE-1771_525               | 26.9  |
| 4151 | 3D | 14604 | IWB14604 | CAP8_c2305_193              | 27.2  |
| 4152 | 3D | 17585 | IWB17585 | D_F5XZDLF01EIBB2_65         | 27.2  |
| 4153 | 3D | 17109 | IWB17109 | D_contig72157_427           | 27.2  |

|      |    |       |          |                             |      |
|------|----|-------|----------|-----------------------------|------|
| 4154 | 3D | 17224 | IWB17224 | D_contig79290_372           | 27.2 |
| 4155 | 3D | 15625 | IWB15625 | D_contig11810_446           | 27.2 |
| 4156 | 3D | 76064 | IWA1123  | wsnp_CAP7_rep_c5643_2537213 | 27.2 |
| 4157 | 3D | 26102 | IWB26102 | Excalibur_c40068_522        | 27.2 |
| 4158 | 3D | 59242 | IWB59242 | RAC875_c56975_112           | 27.2 |
| 4159 | 3D | 9674  | IWB9674  | BS00065928_51               | 27.2 |
| 4160 | 3D | 55687 | IWB55687 | RAC875_c24641_720           | 27.2 |
| 4161 | 3D | 43595 | IWB43595 | Kukri_c28730_207            | 27.2 |
| 4162 | 3D | 46404 | IWB46404 | Kukri_c5411_1312            | 27.2 |
| 4163 | 3D | 1069  | IWB1069  | BobWhite_c17617_133         | 27.2 |
| 4164 | 3D | 46263 | IWB46263 | Kukri_c5252_107             | 27.2 |
| 4165 | 3D | 868   | IWB868   | BobWhite_c16071_165         | 27.2 |
| 4166 | 3D | 3494  | IWB3494  | BobWhite_c4607_235          | 27.2 |
| 4167 | 3D | 13411 | IWB13411 | CAP12_c470_361              | 27.2 |
| 4168 | 3D | 53123 | IWB53123 | RAC875_c10628_1037          | 27.2 |
| 4169 | 3D | 53124 | IWB53124 | RAC875_c10628_1079          | 27.2 |
| 4170 | 3D | 15510 | IWB15510 | D_contig09222_937           | 27.2 |
| 4171 | 3D | 17980 | IWB17980 | D_GB5Y7FA01BMVS5_180        | 27.2 |
| 4172 | 3D | 48230 | IWB48230 | Kukri_c908_584              | 27.2 |
| 4173 | 3D | 47841 | IWB47841 | Kukri_c80364_374            | 28.1 |
| 4174 | 3D | 15864 | IWB15864 | D_contig17344_388           | 28.1 |
| 4175 | 3D | 19197 | IWB19197 | D_GDRF1KQ02F7Y6F_336        | 28.1 |
| 4176 | 3D | 76042 | IWA1082  | wsnp_CAP7_c3519_1643682     | 28.6 |
| 4177 | 3D | 47033 | IWB47033 | Kukri_c62907_121            | 28.6 |
| 4178 | 3D | 18689 | IWB18689 | D_GBUVHFX02G2BTK_399        | 42.7 |
| 4179 | 3D | 44143 | IWB44143 | Kukri_c32857_1101           | 43.2 |
| 4180 | 3D | 73071 | IWB73071 | Tdurum_contig67613_465      | 43.2 |
| 4181 | 3D | 76936 | IWA2293  | wsnp_Ex_c18250_27065775     | 49.5 |
| 4182 | 3D | 30686 | IWB30686 | Excalibur_rep_c114833_645   | 49.7 |
| 4183 | 3D | 77091 | IWA2498  | wsnp_Ex_c20011_29041563     | 49.7 |
| 4184 | 3D | 34616 | IWB34616 | IAAV2827                    | 50.0 |
| 4185 | 3D | 15880 | IWB15880 | D_contig17622_230           | 51.4 |
| 4186 | 3D | 79598 | IWA5750  | wsnp_Ex_rep_c78526_74641162 | 51.4 |
| 4187 | 3D | 38826 | IWB38826 | Ku_c22692_1021              | 51.4 |
| 4188 | 3D | 78396 | IWA4209  | wsnp_Ex_c54003_57045475     | 51.4 |
| 4189 | 3D | 79646 | IWA5816  | wsnp_JD_c12604_12812295     | 51.4 |
| 4190 | 3D | 45847 | IWB45847 | Kukri_c48146_554            | 51.4 |
| 4191 | 3D | 78737 | IWA4647  | wsnp_Ex_c7260_12463738      | 51.4 |
| 4192 | 3D | 79910 | IWA6225  | wsnp_JD_c9392_10241235      | 51.4 |
| 4193 | 3D | 45318 | IWB45318 | Kukri_c43208_335            | 51.4 |
| 4194 | 3D | 81325 | IWA8179  | wsnp_Ra_rep_c71290_69343893 | 51.4 |
| 4195 | 3D | 31419 | IWB31419 | Excalibur_rep_c93332_58     | 51.4 |
| 4196 | 3D | 17892 | IWB17892 | D_GA8KES402HQTPI_166        | 51.7 |
| 4197 | 3D | 1034  | IWB1034  | BobWhite_c17386_221         | 51.7 |
| 4198 | 3D | 44015 | IWB44015 | Kukri_c31733_290            | 51.7 |
| 4199 | 3D | 18579 | IWB18579 | D_GBUVHFX01BFAWD_100        | 54.7 |
| 4200 | 3D | 52061 | IWB52061 | Ra_c4231_465                | 54.9 |
| 4201 | 3D | 50128 | IWB50128 | Kukri_rep_c71523_81         | 56.1 |
| 4202 | 3D | 34348 | IWB34348 | IAAV1270                    | 58.7 |
| 4203 | 3D | 24655 | IWB24655 | Excalibur_c27999_500        | 59.0 |
| 4204 | 3D | 65514 | IWB65514 | TA002219-1181               | 61.9 |
| 4205 | 3D | 44854 | IWB44854 | Kukri_c38868_427            | 62.4 |
| 4206 | 3D | 55287 | IWB55287 | RAC875_c22054_1936          | 66.0 |
| 4207 | 3D | 18741 | IWB18741 | D_GBUVHFX02JH8X4_174        | 66.8 |

|      |    |       |          |                              |       |
|------|----|-------|----------|------------------------------|-------|
| 4208 | 3D | 37971 | IWB37971 | JG_c34_270                   | 68.3  |
| 4209 | 3D | 36343 | IWB36343 | IACX905                      | 68.3  |
| 4210 | 3D | 59326 | IWB59326 | RAC875_c57955_726            | 68.3  |
| 4211 | 3D | 79035 | IWA5030  | wsnp_Ex_rep_c101732_87042471 | 68.3  |
| 4212 | 3D | 16307 | IWB16307 | D_contig27028_52             | 68.3  |
| 4213 | 3D | 60076 | IWB60076 | RAC875_c67198_129            | 68.3  |
| 4214 | 3D | 17065 | IWB17065 | D_contig68985_131            | 68.3  |
| 4215 | 3D | 49495 | IWB49495 | Kukri_rep_c111324_198        | 68.3  |
| 4216 | 3D | 17435 | IWB17435 | D_F5MV3MU01D5Z65_148         | 68.3  |
| 4217 | 3D | 63677 | IWB63677 | RFL_Contig1537_638           | 70.3  |
| 4218 | 3D | 18874 | IWB18874 | D_GCE8AKX02GSCVR_40          | 71.7  |
| 4219 | 3D | 30266 | IWB30266 | Excalibur_rep_c107481_157    | 75.2  |
| 4220 | 3D | 50525 | IWB50525 | Kukri_rep_c94512_55          | 75.5  |
| 4221 | 3D | 57558 | IWB57558 | RAC875_c39875_206            | 75.5  |
| 4222 | 3D | 81576 | IWA8610  | wsnp_RFL_Contig463_5510887   | 75.8  |
| 4223 | 3D | 19217 | IWB19217 | D_GDRF1KQ02GV96X_70          | 76.0  |
| 4224 | 3D | 18414 | IWB18414 | D_GBF1XID01ELEX6_151         | 77.2  |
| 4225 | 3D | 61291 | IWB61291 | RAC875_c99415_708            | 78.3  |
| 4226 | 3D | 23678 | IWB23678 | Excalibur_c21708_291         | 82.2  |
| 4227 | 3D | 17930 | IWB17930 | D_GA8KES402JVT1Y_74          | 82.2  |
| 4228 | 3D | 32653 | IWB32653 | GENE-1785_118                | 82.2  |
| 4229 | 3D | 9976  | IWB9976  | BS00067163_51                | 82.2  |
| 4230 | 3D | 13317 | IWB13317 | CAP12_c2615_128              | 87.8  |
| 4231 | 3D | 1418  | IWB1418  | BobWhite_c20641_267          | 96.3  |
| 4232 | 3D | 3090  | IWB3090  | BobWhite_c40017_353          | 107.8 |
| 4233 | 3D | 16791 | IWB16791 | D_contig39749_653            | 108.4 |
| 4234 | 3D | 16202 | IWB16202 | D_contig24884_83             | 109.5 |
| 4235 | 3D | 16687 | IWB16687 | D_contig36392_363            | 110.6 |
| 4236 | 3D | 9019  | IWB9019  | BS00063214_51                | 110.6 |
| 4237 | 3D | 36571 | IWB36571 | Jagger_c3839_60              | 111.7 |
| 4238 | 3D | 18421 | IWB18421 | D_GBF1XID01ETBRB_172         | 113.4 |
| 4239 | 3D | 42714 | IWB42714 | Kukri_c2289_635              | 114.0 |
| 4240 | 3D | 6798  | IWB6798  | BS00021919_51                | 114.0 |
| 4241 | 3D | 19457 | IWB19457 | D_GDS7LZN02IIERD_132         | 116.9 |
| 4242 | 3D | 59163 | IWB59163 | RAC875_c5606_501             | 116.9 |
| 4243 | 3D | 4163  | IWB4163  | BobWhite_c6420_284           | 117.2 |
| 4244 | 3D | 16679 | IWB16679 | D_contig36160_443            | 117.7 |
| 4245 | 3D | 45351 | IWB45351 | Kukri_c43464_89              | 118.0 |
| 4246 | 3D | 56671 | IWB56671 | RAC875_c31922_138            | 118.0 |
| 4247 | 3D | 17317 | IWB17317 | D_F1BEJMU01DVMII_118         | 118.0 |
| 4248 | 3D | 15087 | IWB15087 | CAP8_rep_c9749_188           | 119.1 |
| 4249 | 3D | 65988 | IWB65988 | TA005589-0861                | 119.1 |
| 4250 | 3D | 41302 | IWB41302 | Kukri_c14943_753             | 119.1 |
| 4251 | 3D | 37443 | IWB37443 | JD_c42309_341                | 119.1 |
| 4252 | 3D | 35284 | IWB35284 | IAAV7013                     | 119.1 |
| 4253 | 3D | 15139 | IWB15139 | D_contig00455_358            | 119.1 |
| 4254 | 3D | 10689 | IWB10689 | BS00073760_51                | 119.1 |
| 4255 | 3D | 45229 | IWB45229 | Kukri_c4230_398              | 119.1 |
| 4256 | 3D | 75234 | IWB75234 | tplb0060a09_1160             | 119.1 |
| 4257 | 3D | 80287 | IWA6777  | wsnp_Ku_c25527_35493338      | 119.1 |
| 4258 | 3D | 13582 | IWB13582 | CAP12_rep_c3953_177          | 119.1 |
| 4259 | 3D | 23543 | IWB23543 | Excalibur_c20791_845         | 119.1 |
| 4260 | 3D | 37812 | IWB37812 | JD_c7714_954                 | 119.1 |
| 4261 | 3D | 45698 | IWB45698 | Kukri_c46716_211             | 119.1 |

|      |    |       |          |                             |       |
|------|----|-------|----------|-----------------------------|-------|
| 4262 | 3D | 79197 | IWA5223  | wsnp_Ex_rep_c66380_64574083 | 119.1 |
| 4263 | 3D | 50751 | IWB50751 | Ra_c10378_1677              | 119.1 |
| 4264 | 3D | 18684 | IWB18684 | D_GBUVHFX02FQKHM_48         | 119.1 |
| 4265 | 3D | 52592 | IWB52592 | Ra_c72650_1176              | 119.1 |
| 4266 | 3D | 51827 | IWB51827 | Ra_c32057_95                | 119.1 |
| 4267 | 3D | 52398 | IWB52398 | Ra_c6639_1170               | 119.1 |
| 4268 | 3D | 7555  | IWB7555  | BS00024812_51               | 119.1 |
| 4269 | 3D | 17449 | IWB17449 | D_F5MV3MU01DWT7N_151        | 119.1 |
| 4270 | 3D | 16761 | IWB16761 | D_contig38515_309           | 119.1 |
| 4271 | 3D | 23810 | IWB23810 | Excalibur_c22503_590        | 119.1 |
| 4272 | 3D | 14020 | IWB14020 | CAP7_c3438_196              | 119.1 |
| 4273 | 3D | 60735 | IWB60735 | RAC875_c83182_90            | 119.1 |
| 4274 | 3D | 75437 | IWA153   | wsnp_BE444579D_Ta_2_3       | 119.1 |
| 4275 | 3D | 6645  | IWB6645  | BS00017789_51               | 119.1 |
| 4276 | 3D | 52402 | IWB52402 | Ra_c6639_542                | 119.1 |
| 4277 | 3D | 63653 | IWB63653 | RFL_Contig148_359           | 119.1 |
| 4278 | 3D | 55041 | IWB55041 | RAC875_c20675_268           | 119.1 |
| 4279 | 3D | 26400 | IWB26400 | Excalibur_c4302_2208        | 119.1 |
| 4280 | 3D | 52400 | IWB52400 | Ra_c6639_384                | 119.1 |
| 4281 | 3D | 27218 | IWB27218 | Excalibur_c51312_218        | 119.1 |
| 4282 | 3D | 35402 | IWB35402 | IAAV7897                    | 119.1 |
| 4283 | 3D | 81241 | IWA8059  | wsnp_Ra_c7174_12417331      | 119.1 |
| 4284 | 3D | 76406 | IWA1624  | wsnp_Ex_c12424_19815550     | 119.1 |
| 4285 | 3D | 5027  | IWB5027  | BobWhite_rep_c52911_146     | 119.1 |
| 4286 | 3D | 15765 | IWB15765 | D_contig15178_246           | 119.1 |
| 4287 | 3D | 7920  | IWB7920  | BS00033229_51               | 119.3 |
| 4288 | 3D | 22998 | IWB22998 | Excalibur_c17654_351        | 119.6 |
| 4289 | 3D | 5822  | IWB5822  | BS00003119_51               | 119.9 |
| 4290 | 3D | 19001 | IWB19001 | D_GDEEGVY01CO81T_81         | 119.9 |
| 4291 | 3D | 10438 | IWB10438 | BS00070060_51               | 119.9 |
| 4292 | 3D | 28524 | IWB28524 | Excalibur_c6906_804         | 119.9 |
| 4293 | 3D | 76481 | IWA1715  | wsnp_Ex_c12963_20529964     | 119.9 |
| 4294 | 3D | 80667 | IWA7274  | wsnp_Ku_c7264_12545135      | 119.9 |
| 4295 | 3D | 3769  | IWB3769  | BobWhite_c5246_196          | 119.9 |
| 4296 | 3D | 23615 | IWB23615 | Excalibur_c21265_461        | 119.9 |
| 4297 | 3D | 35051 | IWB35051 | IAAV5582                    | 119.9 |
| 4298 | 3D | 10989 | IWB10989 | BS00078098_51               | 120.2 |
| 4299 | 3D | 12656 | IWB12656 | CAP11_c1051_121             | 120.2 |
| 4300 | 4A | 37183 | IWB37183 | JD_c21248_511               | 0.0   |
| 4301 | 4A | 10748 | IWB10748 | BS00074614_51               | 0.0   |
| 4302 | 4A | 19265 | IWB19265 | D_GDRF1KQ02JZS7N_128        | 0.3   |
| 4303 | 4A | 67708 | IWB67708 | Tdurum_contig12696_528      | 6.3   |
| 4304 | 4A | 68749 | IWB68749 | Tdurum_contig1868_249       | 13.2  |
| 4305 | 4A | 72445 | IWB72445 | Tdurum_contig55438_182      | 14.1  |
| 4306 | 4A | 52625 | IWB52625 | Ra_c74035_586               | 18.0  |
| 4307 | 4A | 40004 | IWB40004 | Ku_c7594_1179               | 18.0  |
| 4308 | 4A | 72314 | IWB72314 | Tdurum_contig53373_192      | 18.0  |
| 4309 | 4A | 21309 | IWB21309 | Ex_c7626_392                | 18.0  |
| 4310 | 4A | 21310 | IWB21310 | Ex_c7626_444                | 18.0  |
| 4311 | 4A | 21402 | IWB21402 | Ex_c883_2618                | 19.1  |
| 4312 | 4A | 8056  | IWB8056  | BS00036493_51               | 19.4  |
| 4313 | 4A | 56757 | IWB56757 | RAC875_c32657_295           | 25.3  |
| 4314 | 4A | 39336 | IWB39336 | Ku_c3891_336                | 25.6  |
| 4315 | 4A | 40011 | IWB40011 | Ku_c766_2284                | 25.6  |



|      |    |       |          |                              |      |
|------|----|-------|----------|------------------------------|------|
| 4316 | 4A | 40013 | IWB40013 | Ku_c766_36                   | 25.6 |
| 4317 | 4A | 56172 | IWB56172 | RAC875_c28178_889            | 25.6 |
| 4318 | 4A | 40010 | IWB40010 | Ku_c766_1798                 | 25.6 |
| 4319 | 4A | 39337 | IWB39337 | Ku_c3891_395                 | 25.6 |
| 4320 | 4A | 80759 | IWA7394  | wsnp_Ku_rep_c102527_89481571 | 25.6 |
| 4321 | 4A | 26155 | IWB26155 | Excalibur_c40618_182         | 26.1 |
| 4322 | 4A | 6860  | IWB6860  | BS00022015_51                | 26.1 |
| 4323 | 4A | 70443 | IWB70443 | Tdurum_contig33628_85        | 26.1 |
| 4324 | 4A | 70442 | IWB70442 | Tdurum_contig33628_129       | 26.1 |
| 4325 | 4A | 11606 | IWB11606 | BS00089283_51                | 26.1 |
| 4326 | 4A | 67355 | IWB67355 | Tdurum_contig11919_360       | 26.1 |
| 4327 | 4A | 76067 | IWA1137  | wsnp_CAP8_c1013_646748       | 26.4 |
| 4328 | 4A | 40358 | IWB40358 | Kukri_c10501_313             | 26.4 |
| 4329 | 4A | 6335  | IWB6335  | BS00011060_51                | 29.7 |
| 4330 | 4A | 42619 | IWB42619 | Kukri_c22231_87              | 29.7 |
| 4331 | 4A | 47589 | IWB47589 | Kukri_c74409_199             | 30.0 |
| 4332 | 4A | 77117 | IWA2533  | wsnp_Ex_c20386_29451037      | 30.0 |
| 4333 | 4A | 75759 | IWA603   | wsnp_BM138178A_Ta_2_1        | 31.4 |
| 4334 | 4A | 60371 | IWB60371 | RAC875_c754_120              | 32.0 |
| 4335 | 4A | 34759 | IWB34759 | IAAV3697                     | 32.3 |
| 4336 | 4A | 3922  | IWB3922  | BobWhite_c5633_59            | 32.3 |
| 4337 | 4A | 5591  | IWB5591  | BobWhite_rep_c66057_98       | 32.3 |
| 4338 | 4A | 79312 | IWA5363  | wsnp_Ex_rep_c67145_65628860  | 32.3 |
| 4339 | 4A | 78478 | IWA4320  | wsnp_Ex_c5690_9994305        | 33.1 |
| 4340 | 4A | 22239 | IWB22239 | Excalibur_c13276_1322        | 33.4 |
| 4341 | 4A | 4316  | IWB4316  | BobWhite_c7260_197           | 33.4 |
| 4342 | 4A | 4310  | IWB4310  | BobWhite_c7235_365           | 33.7 |
| 4343 | 4A | 78596 | IWA4479  | wsnp_Ex_c6320_11003498       | 33.7 |
| 4344 | 4A | 78435 | IWA4260  | wsnp_Ex_c55245_57821389      | 33.7 |
| 4345 | 4A | 6362  | IWB6362  | BS00011173_51                | 33.7 |
| 4346 | 4A | 76702 | IWA1992  | wsnp_Ex_c1520_2906995        | 33.9 |
| 4347 | 4A | 78428 | IWA4252  | wsnp_Ex_c5487_9686018        | 33.9 |
| 4348 | 4A | 32882 | IWB32882 | GENE-2331_126                | 34.5 |
| 4349 | 4A | 77906 | IWA3584  | wsnp_Ex_c36701_44603531      | 35.1 |
| 4350 | 4A | 45543 | IWB45543 | Kukri_c4559_278              | 35.1 |
| 4351 | 4A | 80749 | IWA7382  | wsnp_Ku_rep_c101597_88729428 | 37.1 |
| 4352 | 4A | 20649 | IWB20649 | Ex_c40210_281                | 37.1 |
| 4353 | 4A | 45656 | IWB45656 | Kukri_c46421_168             | 37.4 |
| 4354 | 4A | 65557 | IWB65557 | TA002470-0544                | 37.7 |
| 4355 | 4A | 77539 | IWA3119  | wsnp_Ex_c27570_36762421      | 37.7 |
| 4356 | 4A | 81424 | IWA8342  | wsnp_RFL_Contig2500_2084385  | 37.7 |
| 4357 | 4A | 28071 | IWB28071 | Excalibur_c61788_536         | 37.7 |
| 4358 | 4A | 75590 | IWA371   | wsnp_BE591195A_Ta_1_1        | 37.7 |
| 4359 | 4A | 2521  | IWB2521  | BobWhite_c32217_147          | 37.7 |
| 4360 | 4A | 52375 | IWB52375 | Ra_c64313_1337               | 38.0 |
| 4361 | 4A | 81378 | IWA8265  | wsnp_RFL_Contig1883_1034534  | 38.3 |
| 4362 | 4A | 20670 | IWB20670 | Ex_c41192_1307               | 38.3 |
| 4363 | 4A | 48544 | IWB48544 | Kukri_c9931_1627             | 38.3 |
| 4364 | 4A | 78049 | IWA3763  | wsnp_Ex_c41192_48071978      | 38.3 |
| 4365 | 4A | 75957 | IWA912   | wsnp_CAP12_c124_70843        | 38.3 |
| 4366 | 4A | 80198 | IWA6659  | wsnp_Ku_c18734_28082266      | 38.3 |
| 4367 | 4A | 75864 | IWA750   | wsnp_CAP11_c3346_1639010     | 38.3 |
| 4368 | 4A | 75257 | IWB75257 | tplb0060i01_819              | 38.3 |
| 4369 | 4A | 79173 | IWA5196  | wsnp_Ex_rep_c66304_64468123  | 38.3 |

|      |    |       |          |                              |      |
|------|----|-------|----------|------------------------------|------|
| 4370 | 4A | 41008 | IWB41008 | Kukri_c13260_348             | 38.3 |
| 4371 | 4A | 40264 | IWB40264 | Kukri_c10149_512             | 38.3 |
| 4372 | 4A | 65063 | IWB65063 | RFL_Contig5626_821           | 38.3 |
| 4373 | 4A | 21705 | IWB21705 | Excalibur_c10673_118         | 38.3 |
| 4374 | 4A | 79564 | IWA5705  | wsnp_Ex_rep_c70681_69583486  | 38.3 |
| 4375 | 4A | 14630 | IWB14630 | CAP8_c2552_103               | 38.3 |
| 4376 | 4A | 79114 | IWA5127  | wsnp_Ex_rep_c105114_89631277 | 38.5 |
| 4377 | 4A | 76686 | IWA1969  | wsnp_Ex_c15000_23158167      | 38.5 |
| 4378 | 4A | 60281 | IWB60281 | RAC875_c7053_711             | 38.5 |
| 4379 | 4A | 35511 | IWB35511 | IAAV8640                     | 38.5 |
| 4380 | 4A | 81397 | IWA8296  | wsnp_RFL_Contig2124_1400618  | 38.5 |
| 4381 | 4A | 77689 | IWA3308  | wsnp_Ex_c30989_39836034      | 38.5 |
| 4382 | 4A | 79404 | IWA5490  | wsnp_Ex_rep_c68052_66798492  | 38.5 |
| 4383 | 4A | 13065 | IWB13065 | CAP11_c8388_194              | 38.5 |
| 4384 | 4A | 80524 | IWA7080  | wsnp_Ku_c45402_52441010      | 38.5 |
| 4385 | 4A | 59747 | IWB59747 | RAC875_c6312_156             | 38.5 |
| 4386 | 4A | 32855 | IWB32855 | GENE-2264_72                 | 38.5 |
| 4387 | 4A | 33045 | IWB33045 | GENE-2730_171                | 38.5 |
| 4388 | 4A | 74693 | IWB74693 | tplb0040n03_1154             | 38.5 |
| 4389 | 4A | 79522 | IWA5648  | wsnp_Ex_rep_c69852_68811496  | 38.5 |
| 4390 | 4A | 49921 | IWB49921 | Kukri_rep_c69658_148         | 38.5 |
| 4391 | 4A | 28616 | IWB28616 | Excalibur_c7213_1169         | 38.5 |
| 4392 | 4A | 77978 | IWA3671  | wsnp_Ex_c39168_46522625      | 38.5 |
| 4393 | 4A | 80214 | IWA6678  | wsnp_Ku_c19762_29300876      | 38.5 |
| 4394 | 4A | 77690 | IWA3309  | wsnp_Ex_c30989_39836304      | 38.5 |
| 4395 | 4A | 60280 | IWB60280 | RAC875_c7053_2389            | 38.5 |
| 4396 | 4A | 43496 | IWB43496 | Kukri_c27827_296             | 38.5 |
| 4397 | 4A | 80391 | IWA6911  | wsnp_Ku_c32619_42216179      | 38.8 |
| 4398 | 4A | 74892 | IWB74892 | tplb0047e04_1207             | 38.8 |
| 4399 | 4A | 55642 | IWB55642 | RAC875_c24370_131            | 38.8 |
| 4400 | 4A | 33395 | IWB33395 | GENE-3446_736                | 39.1 |
| 4401 | 4A | 47482 | IWB47482 | Kukri_c6954_152              | 39.1 |
| 4402 | 4A | 75383 | IWA78    | wsnp_BE423455A_Ta_1_2        | 39.1 |
| 4403 | 4A | 35628 | IWB35628 | IACX1042                     | 39.1 |
| 4404 | 4A | 75384 | IWA79    | wsnp_BE423455A_Ta_1_3        | 39.1 |
| 4405 | 4A | 63998 | IWB63998 | RFL_Contig2581_472           | 39.1 |
| 4406 | 4A | 30780 | IWB30780 | Excalibur_rep_c66815_273     | 39.7 |
| 4407 | 4A | 78108 | IWA3845  | wsnp_Ex_c4286_7734046        | 40.0 |
| 4408 | 4A | 80534 | IWA7092  | wsnp_Ku_c46057_52907637      | 40.0 |
| 4409 | 4A | 80567 | IWA7133  | wsnp_Ku_c50991_56423564      | 40.0 |
| 4410 | 4A | 77294 | IWA2781  | wsnp_Ex_c23130_32358433      | 40.0 |
| 4411 | 4A | 80117 | IWA6540  | wsnp_Ku_c14803_23225628      | 40.0 |
| 4412 | 4A | 80663 | IWA7270  | wsnp_Ku_c7197_12439299       | 40.0 |
| 4413 | 4A | 3065  | IWB3065  | BobWhite_c39599_82           | 40.0 |
| 4414 | 4A | 54697 | IWB54697 | RAC875_c18564_222            | 40.0 |
| 4415 | 4A | 80158 | IWA6597  | wsnp_Ku_c16481_25377573      | 40.0 |
| 4416 | 4A | 76187 | IWA1341  | wsnp_Ex_c10527_17198865      | 40.0 |
| 4417 | 4A | 77875 | IWA3542  | wsnp_Ex_c35839_43909849      | 40.0 |
| 4418 | 4A | 80664 | IWA7271  | wsnp_Ku_c7197_12439730       | 40.0 |
| 4419 | 4A | 80568 | IWA7134  | wsnp_Ku_c50991_56423610      | 40.0 |
| 4420 | 4A | 32953 | IWB32953 | GENE-2491_309                | 40.0 |
| 4421 | 4A | 45611 | IWB45611 | Kukri_c46057_646             | 40.0 |
| 4422 | 4A | 76571 | IWA1824  | wsnp_Ex_c1387_2659020        | 40.0 |
| 4423 | 4A | 77735 | IWA3361  | wsnp_Ex_c3178_5868813        | 40.0 |

|      |    |       |          |                              |      |
|------|----|-------|----------|------------------------------|------|
| 4424 | 4A | 81096 | IWA7859  | wsnp_Ra_c31915_40982091      | 40.0 |
| 4425 | 4A | 34799 | IWB34799 | IAAV3906                     | 40.0 |
| 4426 | 4A | 77874 | IWA3541  | wsnp_Ex_c35839_43909163      | 40.0 |
| 4427 | 4A | 77691 | IWA3311  | wsnp_Ex_c31006_39850673      | 40.2 |
| 4428 | 4A | 61774 | IWB61774 | RAC875_rep_c108287_212       | 40.2 |
| 4429 | 4A | 32815 | IWB32815 | GENE-2127_235                | 40.5 |
| 4430 | 4A | 21033 | IWB21033 | Ex_c63544_226                | 40.5 |
| 4431 | 4A | 45447 | IWB45447 | Kukri_c44469_1240            | 40.5 |
| 4432 | 4A | 35538 | IWB35538 | IAAV8784                     | 40.5 |
| 4433 | 4A | 80418 | IWA6944  | wsnp_Ku_c34883_44172415      | 40.5 |
| 4434 | 4A | 45848 | IWB45848 | Kukri_c48155_158             | 40.5 |
| 4435 | 4A | 75539 | IWA296   | wsnp_BE497618A_Ta_1_1        | 40.5 |
| 4436 | 4A | 56922 | IWB56922 | RAC875_c34232_184            | 40.5 |
| 4437 | 4A | 77903 | IWA3581  | wsnp_Ex_c3666_6687275        | 40.5 |
| 4438 | 4A | 78840 | IWA4772  | wsnp_Ex_c8131_13754852       | 40.5 |
| 4439 | 4A | 79582 | IWA5729  | wsnp_Ex_rep_c71305_70087742  | 40.5 |
| 4440 | 4A | 77904 | IWA3582  | wsnp_Ex_c3666_6687919        | 40.5 |
| 4441 | 4A | 55905 | IWB55905 | RAC875_c26184_273            | 40.5 |
| 4442 | 4A | 78839 | IWA4771  | wsnp_Ex_c8131_13753986       | 40.5 |
| 4443 | 4A | 23251 | IWB23251 | Excalibur_c19065_589         | 40.5 |
| 4444 | 4A | 37346 | IWB37346 | JD_c32759_313                | 40.5 |
| 4445 | 4A | 20000 | IWB20000 | Ex_c17894_1159               | 40.5 |
| 4446 | 4A | 79790 | IWA6046  | wsnp_JD_c4217_5322858        | 40.5 |
| 4447 | 4A | 80854 | IWA7522  | wsnp_Ku_rep_c77171_75478137  | 40.5 |
| 4448 | 4A | 77518 | IWA3088  | wsnp_Ex_c27088_36309449      | 40.5 |
| 4449 | 4A | 70517 | IWB70517 | Tdurum_contig34920_104       | 40.5 |
| 4450 | 4A | 74553 | IWB74553 | tplb0035b22_184              | 40.5 |
| 4451 | 4A | 48148 | IWB48148 | Kukri_c88331_423             | 40.5 |
| 4452 | 4A | 78703 | IWA4608  | wsnp_Ex_c7011_12080274       | 41.4 |
| 4453 | 4A | 27970 | IWB27970 | Excalibur_c60487_908         | 42.0 |
| 4454 | 4A | 31313 | IWB31313 | Excalibur_rep_c80895_95      | 42.0 |
| 4455 | 4A | 40072 | IWB40072 | Ku_c8303_880                 | 42.0 |
| 4456 | 4A | 41129 | IWB41129 | Kukri_c13991_279             | 42.0 |
| 4457 | 4A | 72073 | IWB72073 | Tdurum_contig50388_343       | 42.0 |
| 4458 | 4A | 76036 | IWA1074  | wsnp_CAP7_c2931_1395666      | 42.0 |
| 4459 | 4A | 47602 | IWB47602 | Kukri_c74651_223             | 42.0 |
| 4460 | 4A | 26384 | IWB26384 | Excalibur_c4283_201          | 42.0 |
| 4461 | 4A | 43370 | IWB43370 | Kukri_c27037_112             | 42.0 |
| 4462 | 4A | 1356  | IWB1356  | BobWhite_c20163_456          | 42.0 |
| 4463 | 4A | 25105 | IWB25105 | Excalibur_c31484_124         | 42.0 |
| 4464 | 4A | 25147 | IWB25147 | Excalibur_c31814_298         | 42.0 |
| 4465 | 4A | 74979 | IWB74979 | tplb0051b16_1324             | 42.0 |
| 4466 | 4A | 79289 | IWA5335  | wsnp_Ex_rep_c66930_65358529  | 42.0 |
| 4467 | 4A | 1119  | IWB1119  | BobWhite_c17999_112          | 42.0 |
| 4468 | 4A | 80041 | IWA6443  | wsnp_Ku_c11945_19406789      | 42.0 |
| 4469 | 4A | 56209 | IWB56209 | RAC875_c28616_154            | 42.0 |
| 4470 | 4A | 79378 | IWA5453  | wsnp_Ex_rep_c67779_66463916  | 42.0 |
| 4471 | 4A | 35371 | IWB35371 | IAAV7636                     | 42.0 |
| 4472 | 4A | 53229 | IWB53229 | RAC875_c110384_153           | 42.0 |
| 4473 | 4A | 55257 | IWB55257 | RAC875_c21863_233            | 42.0 |
| 4474 | 4A | 76149 | IWA1295  | wsnp_Ex_c10186_16720660      | 42.0 |
| 4475 | 4A | 65188 | IWB65188 | RFL_Contig5998_745           | 42.0 |
| 4476 | 4A | 81292 | IWA8131  | wsnp_Ra_rep_c107017_90667618 | 42.0 |
| 4477 | 4A | 79553 | IWA5687  | wsnp_Ex_rep_c70327_69270561  | 42.0 |

|      |    |       |          |                              |      |
|------|----|-------|----------|------------------------------|------|
| 4478 | 4A | 80620 | IWA7203  | wsnp_Ku_c5979_10559245       | 42.0 |
| 4479 | 4A | 31312 | IWB31312 | Excalibur_rep_c80895_284     | 42.0 |
| 4480 | 4A | 25199 | IWB25199 | Excalibur_c32366_122         | 42.0 |
| 4481 | 4A | 78537 | IWA4395  | wsnp_Ex_c5979_10480527       | 42.0 |
| 4482 | 4A | 81108 | IWA7875  | wsnp_Ra_c33762_42584098      | 42.0 |
| 4483 | 4A | 35170 | IWB35170 | IAAV6223                     | 42.0 |
| 4484 | 4A | 81510 | IWA8495  | wsnp_RFL_Contig3634_3841260  | 42.0 |
| 4485 | 4A | 13450 | IWB13450 | CAP12_c5519_132              | 42.0 |
| 4486 | 4A | 45853 | IWB45853 | Kukri_c48199_102             | 42.5 |
| 4487 | 4A | 58231 | IWB58231 | RAC875_c4629_1344            | 43.1 |
| 4488 | 4A | 79110 | IWA5123  | wsnp_Ex_rep_c104859_89444355 | 43.6 |
| 4489 | 4A | 5380  | IWB5380  | BobWhite_rep_c63429_271      | 43.6 |
| 4490 | 4A | 6945  | IWB6945  | BS00022174_51                | 43.6 |
| 4491 | 4A | 76101 | IWA1219  | wsnp_CAP8_c954_618139        | 43.6 |
| 4492 | 4A | 81423 | IWA8341  | wsnp_RFL_Contig25_2082245    | 43.6 |
| 4493 | 4A | 6937  | IWB6937  | BS00022160_51                | 43.6 |
| 4494 | 4A | 73430 | IWB73430 | Tdurum_contig77704_144       | 43.9 |
| 4495 | 4A | 25985 | IWB25985 | Excalibur_c38910_490         | 43.9 |
| 4496 | 4A | 63363 | IWB63363 | RAC875_rep_c97967_340        | 43.9 |
| 4497 | 4A | 26362 | IWB26362 | Excalibur_c42602_119         | 43.9 |
| 4498 | 4A | 79033 | IWA5026  | wsnp_Ex_rep_c101638_86971861 | 43.9 |
| 4499 | 4A | 76743 | IWA2044  | wsnp_Ex_c1563_2986030        | 43.9 |
| 4500 | 4A | 71275 | IWB71275 | Tdurum_contig42528_1379      | 43.9 |
| 4501 | 4A | 73431 | IWB73431 | Tdurum_contig77704_289       | 43.9 |
| 4502 | 4A | 30558 | IWB30558 | Excalibur_rep_c111789_1040   | 43.9 |
| 4503 | 4A | 79255 | IWA5291  | wsnp_Ex_rep_c66706_65037564  | 43.9 |
| 4504 | 4A | 71278 | IWB71278 | Tdurum_contig42528_767       | 43.9 |
| 4505 | 4A | 485   | IWB485   | BobWhite_c13322_215          | 43.9 |
| 4506 | 4A | 76880 | IWA2211  | wsnp_Ex_c17361_26054611      | 43.9 |
| 4507 | 4A | 76744 | IWA2045  | wsnp_Ex_c1563_2987002        | 43.9 |
| 4508 | 4A | 66958 | IWB66958 | Tdurum_contig11169_401       | 43.9 |
| 4509 | 4A | 79236 | IWA5269  | wsnp_Ex_rep_c66600_64897324  | 43.9 |
| 4510 | 4A | 25253 | IWB25253 | Excalibur_c32735_603         | 44.2 |
| 4511 | 4A | 68644 | IWB68644 | Tdurum_contig17378_1113      | 44.2 |
| 4512 | 4A | 76477 | IWA1711  | wsnp_Ex_c12933_20488438      | 44.2 |
| 4513 | 4A | 78745 | IWA4657  | wsnp_Ex_c7335_12579818       | 44.2 |
| 4514 | 4A | 78850 | IWA4787  | wsnp_Ex_c829_1621908         | 44.2 |
| 4515 | 4A | 81382 | IWA8269  | wsnp_RFL_Contig1910_1074716  | 44.2 |
| 4516 | 4A | 3123  | IWB3123  | BobWhite_c4048_247           | 44.2 |
| 4517 | 4A | 3142  | IWB3142  | BobWhite_c4089_73            | 44.2 |
| 4518 | 4A | 12955 | IWB12955 | CAP11_c5598_321              | 44.2 |
| 4519 | 4A | 28352 | IWB28352 | Excalibur_c65185_665         | 44.2 |
| 4520 | 4A | 20891 | IWB20891 | Ex_c53906_571                | 44.2 |
| 4521 | 4A | 75668 | IWA483   | wsnp_BF474615A_Ta_1_4        | 44.2 |
| 4522 | 4A | 48193 | IWB48193 | Kukri_c89772_150             | 44.2 |
| 4523 | 4A | 6208  | IWB6208  | BS00010339_51                | 44.2 |
| 4524 | 4A | 29546 | IWB29546 | Excalibur_c96303_224         | 44.2 |
| 4525 | 4A | 75367 | IWA53    | wsnp_BE404977A_Ta_1_1        | 44.2 |
| 4526 | 4A | 75729 | IWA568   | wsnp_BG604678A_Ta_1_2        | 44.2 |
| 4527 | 4A | 56169 | IWB56169 | RAC875_c28145_553            | 44.2 |
| 4528 | 4A | 78623 | IWA4512  | wsnp_Ex_c64593_63334637      | 44.2 |
| 4529 | 4A | 75396 | IWA101   | wsnp_BE442666A_Ta_2_1        | 44.2 |
| 4530 | 4A | 78391 | IWA4201  | wsnp_Ex_c53906_56983357      | 44.2 |
| 4531 | 4A | 78847 | IWA4784  | wsnp_Ex_c829_1620518         | 44.2 |

|      |    |       |          |                             |      |
|------|----|-------|----------|-----------------------------|------|
| 4532 | 4A | 20890 | IWB20890 | Ex_c53906_569               | 44.2 |
| 4533 | 4A | 21367 | IWB21367 | Ex_c829_634                 | 44.2 |
| 4534 | 4A | 77353 | IWA2864  | wsnp_Ex_c2403_4502745       | 44.2 |
| 4535 | 4A | 43750 | IWB43750 | Kukri_c29625_198            | 44.2 |
| 4536 | 4A | 80720 | IWA7346  | wsnp_Ku_c9208_15488367      | 44.2 |
| 4537 | 4A | 77971 | IWA3664  | wsnp_Ex_c39021_46412977     | 44.2 |
| 4538 | 4A | 78849 | IWA4786  | wsnp_Ex_c829_1620740        | 44.2 |
| 4539 | 4A | 3706  | IWB3706  | BobWhite_c4931_62           | 44.2 |
| 4540 | 4A | 36471 | IWB36471 | Jagger_c2057_97             | 44.2 |
| 4541 | 4A | 36333 | IWB36333 | IACX8919                    | 44.2 |
| 4542 | 4A | 18669 | IWB18669 | D_GBUVHFX01EZR9Q_294        | 44.2 |
| 4543 | 4A | 3705  | IWB3705  | BobWhite_c4931_170          | 44.2 |
| 4544 | 4A | 851   | IWB851   | BobWhite_c1593_539          | 44.2 |
| 4545 | 4A | 78848 | IWA4785  | wsnp_Ex_c829_1620563        | 44.2 |
| 4546 | 4A | 78566 | IWA4431  | wsnp_Ex_c6139_10739829      | 44.2 |
| 4547 | 4A | 75667 | IWA482   | wsnp_BF474615A_Ta_1_1       | 44.2 |
| 4548 | 4A | 43463 | IWB43463 | Kukri_c2760_804             | 44.2 |
| 4549 | 4A | 14625 | IWB14625 | CAP8_c2527_228              | 44.2 |
| 4550 | 4A | 34865 | IWB34865 | IAAV4351                    | 45.6 |
| 4551 | 4A | 80795 | IWA7442  | wsnp_Ku_rep_c68565_67614479 | 45.6 |
| 4552 | 4A | 4910  | IWB4910  | BobWhite_rep_c50869_1676    | 45.6 |
| 4553 | 4A | 78250 | IWA4023  | wsnp_Ex_c48449_53350799     | 45.6 |
| 4554 | 4A | 6369  | IWB6369  | BS00011224_51               | 45.6 |
| 4555 | 4A | 44533 | IWB44533 | Kukri_c36190_189            | 45.6 |
| 4556 | 4A | 8287  | IWB8287  | BS00041735_51               | 45.6 |
| 4557 | 4A | 43375 | IWB43375 | Kukri_c2706_1424            | 48.3 |
| 4558 | 4A | 58408 | IWB58408 | RAC875_c48107_65            | 48.3 |
| 4559 | 4A | 20842 | IWB20842 | Ex_c50812_358               | 48.5 |
| 4560 | 4A | 4642  | IWB4642  | BobWhite_c9660_938          | 48.8 |
| 4561 | 4A | 11778 | IWB11778 | BS00092859_51               | 49.1 |
| 4562 | 4A | 1321  | IWB1321  | BobWhite_c19919_516         | 49.1 |
| 4563 | 4A | 27809 | IWB27809 | Excalibur_c58393_329        | 49.1 |
| 4564 | 4A | 5803  | IWB5803  | BS00002054_51               | 49.1 |
| 4565 | 4A | 47730 | IWB47730 | Kukri_c7791_99              | 49.1 |
| 4566 | 4A | 32858 | IWB32858 | GENE-2267_428               | 49.1 |
| 4567 | 4A | 34445 | IWB34445 | IAAV1775                    | 49.1 |
| 4568 | 4A | 12329 | IWB12329 | BS00107766_51               | 49.1 |
| 4569 | 4A | 28054 | IWB28054 | Excalibur_c6144_1873        | 49.1 |
| 4570 | 4A | 61099 | IWB61099 | RAC875_c94519_448           | 49.1 |
| 4571 | 4A | 1450  | IWB1450  | BobWhite_c20909_243         | 49.1 |
| 4572 | 4A | 7386  | IWB7386  | BS00023031_51               | 49.1 |
| 4573 | 4A | 12302 | IWB12302 | BS00107069_51               | 49.1 |
| 4574 | 4A | 4821  | IWB4821  | BobWhite_rep_c49931_364     | 49.1 |
| 4575 | 4A | 40107 | IWB40107 | Ku_c8733_458                | 49.1 |
| 4576 | 4A | 12303 | IWB12303 | BS00107097_51               | 49.1 |
| 4577 | 4A | 50854 | IWB50854 | Ra_c1082_1100               | 49.1 |
| 4578 | 4A | 58650 | IWB58650 | RAC875_c50438_637           | 49.1 |
| 4579 | 4A | 5911  | IWB5911  | BS00003866_51               | 49.1 |
| 4580 | 4A | 43499 | IWB43499 | Kukri_c27874_515            | 51.1 |
| 4581 | 4A | 79177 | IWA5200  | wsnp_Ex_rep_c66324_64493429 | 51.1 |
| 4582 | 4A | 40846 | IWB40846 | Kukri_c12563_52             | 51.9 |
| 4583 | 4A | 80506 | IWA7058  | wsnp_Ku_c4342_7887834       | 52.8 |
| 4584 | 4A | 55175 | IWB55175 | RAC875_c21369_425           | 52.8 |
| 4585 | 4A | 80257 | IWA6733  | wsnp_Ku_c2317_4448102       | 55.1 |

|      |    |       |          |                              |       |
|------|----|-------|----------|------------------------------|-------|
| 4586 | 4A | 39801 | IWB39801 | Ku_c6779_1381                | 55.1  |
| 4587 | 4A | 77003 | IWA2383  | wsnp_Ex_c19207_28125072      | 55.1  |
| 4588 | 4A | 78420 | IWA4243  | wsnp_Ex_c5470_9657856        | 55.1  |
| 4589 | 4A | 54572 | IWB54572 | RAC875_c17918_321            | 55.1  |
| 4590 | 4A | 51551 | IWB51551 | Ra_c23848_305                | 55.1  |
| 4591 | 4A | 54916 | IWB54916 | RAC875_c19919_724            | 55.1  |
| 4592 | 4A | 39495 | IWB39495 | Ku_c46953_153                | 55.1  |
| 4593 | 4A | 8103  | IWB8103  | BS00037357_51                | 55.1  |
| 4594 | 4A | 51486 | IWB51486 | Ra_c22675_581                | 55.1  |
| 4595 | 4A | 80386 | IWA6906  | wsnp_Ku_c3237_6024936        | 57.4  |
| 4596 | 4A | 77381 | IWA2904  | wsnp_Ex_c24474_33721784      | 57.4  |
| 4597 | 4A | 71273 | IWB71273 | Tdurum_contig42526_994       | 57.7  |
| 4598 | 4A | 26773 | IWB26773 | Excalibur_c46394_762         | 58.0  |
| 4599 | 4A | 74450 | IWB74450 | tplb0031m13_1902             | 58.0  |
| 4600 | 4A | 30306 | IWB30306 | Excalibur_rep_c107908_308    | 58.0  |
| 4601 | 4A | 72724 | IWB72724 | Tdurum_contig6030_377        | 58.0  |
| 4602 | 4A | 72783 | IWB72783 | Tdurum_contig61343_177       | 58.0  |
| 4603 | 4A | 24172 | IWB24172 | Excalibur_c24511_1196        | 58.0  |
| 4604 | 4A | 74052 | IWB74052 | Tdurum_contig98808_554       | 58.3  |
| 4605 | 4A | 2776  | IWB2776  | BobWhite_c35402_66           | 58.3  |
| 4606 | 4A | 67993 | IWB67993 | Tdurum_contig13489_292       | 58.3  |
| 4607 | 4A | 73994 | IWB73994 | Tdurum_contig97425_92        | 58.8  |
| 4608 | 4A | 5865  | IWB5865  | BS00003674_51                | 58.8  |
| 4609 | 4A | 80692 | IWA7310  | wsnp_Ku_c8059_13763683       | 58.8  |
| 4610 | 4A | 35289 | IWB35289 | IAAV7104                     | 58.8  |
| 4611 | 4A | 10906 | IWB10906 | BS00076874_51                | 58.8  |
| 4612 | 4A | 64452 | IWB64452 | RFL_Contig3679_315           | 58.8  |
| 4613 | 4A | 9237  | IWB9237  | BS00064269_51                | 59.7  |
| 4614 | 4A | 71854 | IWB71854 | Tdurum_contig47858_908       | 64.9  |
| 4615 | 4A | 77587 | IWA3188  | wsnp_Ex_c28728_37832012      | 71.5  |
| 4616 | 4A | 79137 | IWA5152  | wsnp_Ex_rep_c106527_90571247 | 71.5  |
| 4617 | 4A | 75669 | IWA485   | wsnp_BF474862A_Ta_2_1        | 71.5  |
| 4618 | 4A | 73262 | IWB73262 | Tdurum_contig75183_685       | 82.9  |
| 4619 | 4A | 77502 | IWA3068  | wsnp_Ex_c26776_36003586      | 87.5  |
| 4620 | 4A | 73881 | IWB73881 | Tdurum_contig93527_486       | 87.8  |
| 4621 | 4A | 22609 | IWB22609 | Excalibur_c1534_572          | 88.1  |
| 4622 | 4A | 60738 | IWB60738 | RAC875_c83401_115            | 88.9  |
| 4623 | 4A | 66086 | IWB66086 | TA006348-0950                | 88.9  |
| 4624 | 4A | 17614 | IWB17614 | D_F5XZDLF02G9H4M_286         | 88.9  |
| 4625 | 4A | 46085 | IWB46085 | Kukri_c50675_126             | 91.0  |
| 4626 | 4A | 53635 | IWB53635 | RAC875_c12996_2320           | 91.0  |
| 4627 | 4A | 34374 | IWB34374 | IAAV1383                     | 91.0  |
| 4628 | 4A | 51216 | IWB51216 | Ra_c16330_1189               | 91.8  |
| 4629 | 4A | 1080  | IWB1080  | BobWhite_c17731_247          | 91.8  |
| 4630 | 4A | 41759 | IWB41759 | Kukri_c17417_134             | 91.8  |
| 4631 | 4A | 1081  | IWB1081  | BobWhite_c17731_56           | 91.8  |
| 4632 | 4A | 9263  | IWB9263  | BS00064369_51                | 91.8  |
| 4633 | 4A | 6821  | IWB6821  | BS00021957_51                | 92.1  |
| 4634 | 4A | 68606 | IWB68606 | Tdurum_contig17050_547       | 97.6  |
| 4635 | 4A | 34807 | IWB34807 | IAAV3960                     | 98.1  |
| 4636 | 4A | 7898  | IWB7898  | BS00032622_51                | 100.1 |
| 4637 | 4A | 60429 | IWB60429 | RAC875_c7670_219             | 100.7 |
| 4638 | 4A | 25559 | IWB25559 | Excalibur_c35150_108         | 100.7 |
| 4639 | 4A | 51337 | IWB51337 | Ra_c1897_2401                | 100.7 |

|      |    |       |          |                           |       |
|------|----|-------|----------|---------------------------|-------|
| 4640 | 4A | 36257 | IWB36257 | IACX7905                  | 100.7 |
| 4641 | 4A | 45076 | IWB45076 | Kukri_c40856_320          | 100.7 |
| 4642 | 4A | 28894 | IWB28894 | Excalibur_c7897_600       | 100.7 |
| 4643 | 4A | 67551 | IWB67551 | Tdurum_contig12313_290    | 100.7 |
| 4644 | 4A | 47812 | IWB47812 | Kukri_c79627_494          | 100.7 |
| 4645 | 4A | 11041 | IWB11041 | BS00078953_51             | 100.7 |
| 4646 | 4A | 8487  | IWB8487  | BS00048067_51             | 100.7 |
| 4647 | 4A | 45852 | IWB45852 | Kukri_c48194_641          | 100.7 |
| 4648 | 4A | 28848 | IWB28848 | Excalibur_c7753_51        | 100.9 |
| 4649 | 4A | 9301  | IWB9301  | BS00064494_51             | 101.2 |
| 4650 | 4A | 11380 | IWB11380 | BS00084703_51             | 101.5 |
| 4651 | 4A | 61381 | IWB61381 | RAC875_rep_c104791_336    | 112.3 |
| 4652 | 4A | 5798  | IWB5798  | BS00001921_51             | 112.3 |
| 4653 | 4A | 73505 | IWB73505 | Tdurum_contig81450_90     | 112.3 |
| 4654 | 4A | 80227 | IWA6696  | wsnp_Ku_c20949_30631810   | 112.3 |
| 4655 | 4A | 59018 | IWB59018 | RAC875_c54248_724         | 112.3 |
| 4656 | 4A | 6832  | IWB6832  | BS00021973_51             | 112.6 |
| 4657 | 4A | 66663 | IWB66663 | Tdurum_contig10672_117    | 112.6 |
| 4658 | 4A | 9431  | IWB9431  | BS00065030_51             | 114.9 |
| 4659 | 4A | 5461  | IWB5461  | BobWhite_rep_c64377_653   | 114.9 |
| 4660 | 4A | 70620 | IWB70620 | Tdurum_contig39549_245    | 115.1 |
| 4661 | 4A | 62397 | IWB62397 | RAC875_rep_c117027_577    | 116.3 |
| 4662 | 4A | 62395 | IWB62395 | RAC875_rep_c117027_137    | 116.3 |
| 4663 | 4A | 72220 | IWB72220 | Tdurum_contig51959_1408   | 116.5 |
| 4664 | 4A | 78740 | IWA4651  | wsnp_Ex_c7280_12498193    | 116.5 |
| 4665 | 4A | 77800 | IWA3449  | wsnp_Ex_c33778_42210283   | 116.5 |
| 4666 | 4A | 71539 | IWB71539 | Tdurum_contig44771_1001   | 117.6 |
| 4667 | 4A | 30571 | IWB30571 | Excalibur_rep_c112003_621 | 117.6 |
| 4668 | 4A | 66653 | IWB66653 | Tdurum_contig10654_375    | 117.6 |
| 4669 | 4A | 69385 | IWB69385 | Tdurum_contig27944_266    | 117.6 |
| 4670 | 4A | 19549 | IWB19549 | Ex_c101546_128            | 117.6 |
| 4671 | 4A | 70736 | IWB70736 | Tdurum_contig42019_323    | 118.2 |
| 4672 | 4A | 34365 | IWB34365 | IAAV136                   | 119.5 |
| 4673 | 4A | 66435 | IWB66435 | Tdurum_contig10289_1265   | 119.5 |
| 4674 | 4A | 73590 | IWB73590 | Tdurum_contig82636_153    | 119.5 |
| 4675 | 4A | 71145 | IWB71145 | Tdurum_contig42424_238    | 119.5 |
| 4676 | 4A | 66436 | IWB66436 | Tdurum_contig10289_74     | 119.5 |
| 4677 | 4A | 2634  | IWB2634  | BobWhite_c3351_329        | 119.8 |
| 4678 | 4A | 68411 | IWB68411 | Tdurum_contig15425_84     | 119.8 |
| 4679 | 4A | 63095 | IWB63095 | RAC875_rep_c77127_256     | 119.8 |
| 4680 | 4A | 59773 | IWB59773 | RAC875_c63420_397         | 122.5 |
| 4681 | 4A | 65772 | IWB65772 | TA004020-0357             | 122.5 |
| 4682 | 4A | 71768 | IWB71768 | Tdurum_contig47143_241    | 122.8 |
| 4683 | 4A | 34226 | IWB34226 | GENE-4895_66              | 122.8 |
| 4684 | 4A | 34224 | IWB34224 | GENE-4895_249             | 122.8 |
| 4685 | 4A | 71767 | IWB71767 | Tdurum_contig47143_161    | 122.8 |
| 4686 | 4A | 1884  | IWB1884  | BobWhite_c25163_178       | 122.8 |
| 4687 | 4A | 41538 | IWB41538 | Kukri_c1620_779           | 123.0 |
| 4688 | 4A | 70194 | IWB70194 | Tdurum_contig31218_344    | 123.6 |
| 4689 | 4A | 64422 | IWB64422 | RFL_Contig3621_1157       | 123.6 |
| 4690 | 4A | 50440 | IWB50440 | Kukri_rep_c85536_598      | 123.6 |
| 4691 | 4A | 70193 | IWB70193 | Tdurum_contig31218_279    | 123.6 |
| 4692 | 4A | 73933 | IWB73933 | Tdurum_contig9530_69      | 123.6 |
| 4693 | 4A | 68148 | IWB68148 | Tdurum_contig14123_802    | 123.6 |

|      |    |       |          |                          |      |
|------|----|-------|----------|--------------------------|------|
| 4694 | 4B | 80051 | IWA6457  | wsnp_Ku_c12399_20037334  | 0.0  |
| 4695 | 4B | 33242 | IWB33242 | GENE-3126_21             | 0.3  |
| 4696 | 4B | 60835 | IWB60835 | RAC875_c86104_111        | 0.3  |
| 4697 | 4B | 71798 | IWB71798 | Tdurum_contig47429_501   | 0.6  |
| 4698 | 4B | 8693  | IWB8693  | BS00056493_51            | 0.6  |
| 4699 | 4B | 34708 | IWB34708 | IAAV3405                 | 0.6  |
| 4700 | 4B | 59971 | IWB59971 | RAC875_c65707_171        | 0.6  |
| 4701 | 4B | 65491 | IWB65491 | TA002019-0994            | 0.6  |
| 4702 | 4B | 67263 | IWB67263 | Tdurum_contig11733_825   | 0.6  |
| 4703 | 4B | 8694  | IWB8694  | BS00056495_51            | 0.6  |
| 4704 | 4B | 8207  | IWB8207  | BS00040127_51            | 0.6  |
| 4705 | 4B | 6329  | IWB6329  | BS00011038_51            | 0.8  |
| 4706 | 4B | 10565 | IWB10565 | BS00071658_51            | 0.8  |
| 4707 | 4B | 77298 | IWA2785  | wsnp_Ex_c23152_32387271  | 0.8  |
| 4708 | 4B | 35311 | IWB35311 | IAAV7221                 | 0.8  |
| 4709 | 4B | 6954  | IWB6954  | BS00022183_51            | 0.8  |
| 4710 | 4B | 20192 | IWB20192 | Ex_c23152_662            | 0.8  |
| 4711 | 4B | 77697 | IWA3317  | wsnp_Ex_c31121_39955117  | 0.8  |
| 4712 | 4B | 9712  | IWB9712  | BS00066087_51            | 0.8  |
| 4713 | 4B | 9271  | IWB9271  | BS00064403_51            | 2.0  |
| 4714 | 4B | 11911 | IWB11911 | BS00095028_51            | 2.3  |
| 4715 | 4B | 35326 | IWB35326 | IAAV7323                 | 2.3  |
| 4716 | 4B | 34327 | IWB34327 | IAAV1120                 | 2.3  |
| 4717 | 4B | 1847  | IWB1847  | BobWhite_c24745_419      | 2.3  |
| 4718 | 4B | 22429 | IWB22429 | Excalibur_c14401_743     | 2.3  |
| 4719 | 4B | 22425 | IWB22425 | Excalibur_c14401_404     | 2.3  |
| 4720 | 4B | 8981  | IWB8981  | BS00063011_51            | 2.3  |
| 4721 | 4B | 55304 | IWB55304 | RAC875_c22142_333        | 10.6 |
| 4722 | 4B | 34788 | IWB34788 | IAAV3848                 | 10.6 |
| 4723 | 4B | 27569 | IWB27569 | Excalibur_c55463_232     | 10.6 |
| 4724 | 4B | 48970 | IWB48970 | Kukri_rep_c104277_1326   | 10.6 |
| 4725 | 4B | 3541  | IWB3541  | BobWhite_c46938_314      | 10.6 |
| 4726 | 4B | 73905 | IWB73905 | Tdurum_contig94184_313   | 14.3 |
| 4727 | 4B | 63894 | IWB63894 | RFL_Contig2277_1527      | 18.7 |
| 4728 | 4B | 63893 | IWB63893 | RFL_Contig2277_1446      | 18.7 |
| 4729 | 4B | 34257 | IWB34257 | GENE-4933_1085           | 22.9 |
| 4730 | 4B | 34260 | IWB34260 | GENE-4933_489            | 22.9 |
| 4731 | 4B | 31302 | IWB31302 | Excalibur_rep_c79414_306 | 22.9 |
| 4732 | 4B | 73384 | IWB73384 | Tdurum_contig76559_124   | 22.9 |
| 4733 | 4B | 28771 | IWB28771 | Excalibur_c7581_1266     | 22.9 |
| 4734 | 4B | 34258 | IWB34258 | GENE-4933_1095           | 22.9 |
| 4735 | 4B | 28772 | IWB28772 | Excalibur_c7581_791      | 22.9 |
| 4736 | 4B | 36235 | IWB36235 | IACX7746                 | 22.9 |
| 4737 | 4B | 36317 | IWB36317 | IACX8647                 | 22.9 |
| 4738 | 4B | 6068  | IWB6068  | BS00009480_51            | 22.9 |
| 4739 | 4B | 72103 | IWB72103 | Tdurum_contig50625_2342  | 22.9 |
| 4740 | 4B | 6168  | IWB6168  | BS00010115_51            | 22.9 |
| 4741 | 4B | 73354 | IWB73354 | Tdurum_contig76213_958   | 23.2 |
| 4742 | 4B | 73353 | IWB73353 | Tdurum_contig76213_1156  | 23.2 |
| 4743 | 4B | 2333  | IWB2333  | BobWhite_c30050_125      | 24.9 |
| 4744 | 4B | 47849 | IWB47849 | Kukri_c80544_61          | 25.2 |
| 4745 | 4B | 80693 | IWA7311  | wsnp_Ku_c8075_13785546   | 27.2 |
| 4746 | 4B | 17908 | IWB17908 | D_GA8KES402IFV6C_200     | 33.0 |
| 4747 | 4B | 72203 | IWB72203 | Tdurum_contig51688_681   | 35.7 |



|      |    |       |          |                             |      |
|------|----|-------|----------|-----------------------------|------|
| 4748 | 4B | 55324 | IWB55324 | RAC875_c2226_933            | 35.7 |
| 4749 | 4B | 44602 | IWB44602 | Kukri_c36744_353            | 38.0 |
| 4750 | 4B | 56078 | IWB56078 | RAC875_c27536_611           | 38.0 |
| 4751 | 4B | 71280 | IWB71280 | Tdurum_contig42528_884      | 38.0 |
| 4752 | 4B | 71281 | IWB71281 | Tdurum_contig42528_936      | 38.0 |
| 4753 | 4B | 73918 | IWB73918 | Tdurum_contig94674_195      | 38.0 |
| 4754 | 4B | 75728 | IWA566   | wsnp_BG604493B_Ta_1_1       | 38.0 |
| 4755 | 4B | 73919 | IWB73919 | Tdurum_contig94674_207      | 38.0 |
| 4756 | 4B | 66138 | IWB66138 | Tdurum_contig100003_292     | 38.0 |
| 4757 | 4B | 71276 | IWB71276 | Tdurum_contig42528_1416     | 38.0 |
| 4758 | 4B | 14853 | IWB14853 | CAP8_c6159_113              | 38.0 |
| 4759 | 4B | 65937 | IWB65937 | TA005178-0957               | 38.0 |
| 4760 | 4B | 73563 | IWB73563 | Tdurum_contig82378_264      | 38.3 |
| 4761 | 4B | 72949 | IWB72949 | Tdurum_contig63537_2050     | 38.3 |
| 4762 | 4B | 11340 | IWB11340 | BS00084070_51               | 38.3 |
| 4763 | 4B | 70187 | IWB70187 | Tdurum_contig31181_419      | 38.3 |
| 4764 | 4B | 6839  | IWB6839  | BS00021984_51               | 38.3 |
| 4765 | 4B | 7255  | IWB7255  | BS00022785_51               | 38.3 |
| 4766 | 4B | 73564 | IWB73564 | Tdurum_contig82378_561      | 38.3 |
| 4767 | 4B | 66679 | IWB66679 | Tdurum_contig10693_597      | 38.3 |
| 4768 | 4B | 71024 | IWB71024 | Tdurum_contig42229_371      | 38.9 |
| 4769 | 4B | 7934  | IWB7934  | BS00033614_51               | 39.1 |
| 4770 | 4B | 73831 | IWB73831 | Tdurum_contig92931_787      | 39.1 |
| 4771 | 4B | 73832 | IWB73832 | Tdurum_contig92931_882      | 39.1 |
| 4772 | 4B | 12982 | IWB12982 | CAP11_c601_120              | 39.1 |
| 4773 | 4B | 6877  | IWB6877  | BS00022047_51               | 39.1 |
| 4774 | 4B | 71536 | IWB71536 | Tdurum_contig44718_835      | 39.1 |
| 4775 | 4B | 11928 | IWB11928 | BS00095416_51               | 39.1 |
| 4776 | 4B | 8985  | IWB8985  | BS00063035_51               | 40.9 |
| 4777 | 4B | 72801 | IWB72801 | Tdurum_contig6153_192       | 40.9 |
| 4778 | 4B | 71634 | IWB71634 | Tdurum_contig45706_1182     | 41.7 |
| 4779 | 4B | 72936 | IWB72936 | Tdurum_contig63153_343      | 41.7 |
| 4780 | 4B | 71836 | IWB71836 | Tdurum_contig47706_190      | 41.7 |
| 4781 | 4B | 73589 | IWB73589 | Tdurum_contig82633_417      | 42.0 |
| 4782 | 4B | 65619 | IWB65619 | TA002925-3757               | 42.0 |
| 4783 | 4B | 36023 | IWB36023 | IACX5783                    | 42.0 |
| 4784 | 4B | 67456 | IWB67456 | Tdurum_contig12116_297      | 42.0 |
| 4785 | 4B | 72796 | IWB72796 | Tdurum_contig61509_172      | 42.0 |
| 4786 | 4B | 65419 | IWB65419 | TA001590-1389               | 42.0 |
| 4787 | 4B | 68560 | IWB68560 | Tdurum_contig1664_212       | 42.0 |
| 4788 | 4B | 72798 | IWB72798 | Tdurum_contig61509_538      | 42.0 |
| 4789 | 4B | 81376 | IWA8263  | wsnp_RFL_Contig1847_1000121 | 42.0 |
| 4790 | 4B | 71868 | IWB71868 | Tdurum_contig48090_374      | 42.0 |
| 4791 | 4B | 71407 | IWB71407 | Tdurum_contig43279_1088     | 42.0 |
| 4792 | 4B | 43651 | IWB43651 | Kukri_c2913_231             | 42.0 |
| 4793 | 4B | 72612 | IWB72612 | Tdurum_contig58145_743      | 42.0 |
| 4794 | 4B | 73392 | IWB73392 | Tdurum_contig76677_1142     | 42.0 |
| 4795 | 4B | 73393 | IWB73393 | Tdurum_contig76677_265      | 42.0 |
| 4796 | 4B | 6484  | IWB6484  | BS00011859_51               | 42.0 |
| 4797 | 4B | 65933 | IWB65933 | TA005157-0574               | 42.0 |
| 4798 | 4B | 6482  | IWB6482  | BS00011851_51               | 42.0 |
| 4799 | 4B | 45246 | IWB45246 | Kukri_c42458_499            | 42.0 |
| 4800 | 4B | 66324 | IWB66324 | Tdurum_contig10187_1271     | 42.0 |
| 4801 | 4B | 75382 | IWA76    | wsnp_BE422566B_Ta_1_2       | 42.0 |

|      |    |       |          |                           |      |
|------|----|-------|----------|---------------------------|------|
| 4802 | 4B | 24705 | IWB24705 | Excalibur_c28382_336      | 42.0 |
| 4803 | 4B | 72797 | IWB72797 | Tdurum_contig61509_349    | 42.0 |
| 4804 | 4B | 33106 | IWB33106 | GENE-2900_115             | 42.0 |
| 4805 | 4B | 65487 | IWB65487 | TA002011-0754             | 42.0 |
| 4806 | 4B | 72795 | IWB72795 | Tdurum_contig61509_100    | 42.0 |
| 4807 | 4B | 43360 | IWB43360 | Kukri_c26943_862          | 42.0 |
| 4808 | 4B | 65479 | IWB65479 | TA001928-1401             | 42.0 |
| 4809 | 4B | 23513 | IWB23513 | Excalibur_c2056_130       | 42.0 |
| 4810 | 4B | 75381 | IWA75    | wsnp_BE422566B_Ta_1_1     | 42.0 |
| 4811 | 4B | 7822  | IWB7822  | BS00031139_51             | 42.3 |
| 4812 | 4B | 71740 | IWB71740 | Tdurum_contig46987_314    | 42.3 |
| 4813 | 4B | 11391 | IWB11391 | BS00084904_51             | 42.3 |
| 4814 | 4B | 6061  | IWB6061  | BS00009439_51             | 42.3 |
| 4815 | 4B | 71676 | IWB71676 | Tdurum_contig46368_742    | 42.3 |
| 4816 | 4B | 66164 | IWB66164 | Tdurum_contig100205_499   | 42.3 |
| 4817 | 4B | 11999 | IWB11999 | BS00097391_51             | 42.3 |
| 4818 | 4B | 72047 | IWB72047 | Tdurum_contig50123_97     | 42.3 |
| 4819 | 4B | 36016 | IWB36016 | IACX5762                  | 42.3 |
| 4820 | 4B | 71920 | IWB71920 | Tdurum_contig48778_328    | 42.3 |
| 4821 | 4B | 32939 | IWB32939 | GENE-2462_1056            | 42.3 |
| 4822 | 4B | 66545 | IWB66545 | Tdurum_contig10481_91     | 42.3 |
| 4823 | 4B | 72792 | IWB72792 | Tdurum_contig61465_781    | 42.6 |
| 4824 | 4B | 73648 | IWB73648 | Tdurum_contig83679_255    | 42.6 |
| 4825 | 4B | 67887 | IWB67887 | Tdurum_contig13165_767    | 42.6 |
| 4826 | 4B | 73649 | IWB73649 | Tdurum_contig83679_281    | 42.6 |
| 4827 | 4B | 73908 | IWB73908 | Tdurum_contig94240_501    | 42.6 |
| 4828 | 4B | 73915 | IWB73915 | Tdurum_contig94552_326    | 42.6 |
| 4829 | 4B | 67886 | IWB67886 | Tdurum_contig13165_443    | 42.6 |
| 4830 | 4B | 67171 | IWB67171 | Tdurum_contig11603_149    | 42.8 |
| 4831 | 4B | 67485 | IWB67485 | Tdurum_contig12177_380    | 42.8 |
| 4832 | 4B | 67483 | IWB67483 | Tdurum_contig12177_1221   | 42.8 |
| 4833 | 4B | 67487 | IWB67487 | Tdurum_contig12177_607    | 42.8 |
| 4834 | 4B | 30893 | IWB30893 | Excalibur_rep_c67779_2380 | 42.8 |
| 4835 | 4B | 66308 | IWB66308 | Tdurum_contig10160_107    | 42.8 |
| 4836 | 4B | 72005 | IWB72005 | Tdurum_contig4974_2190    | 43.1 |
| 4837 | 4B | 49027 | IWB49027 | Kukri_rep_c104751_388     | 43.1 |
| 4838 | 4B | 27969 | IWB27969 | Excalibur_c60487_1130     | 43.1 |
| 4839 | 4B | 72008 | IWB72008 | Tdurum_contig4974_3193    | 43.1 |
| 4840 | 4B | 65865 | IWB65865 | TA004656-0593             | 43.1 |
| 4841 | 4B | 70202 | IWB70202 | Tdurum_contig31250_273    | 43.1 |
| 4842 | 4B | 72011 | IWB72011 | Tdurum_contig4974_832     | 43.1 |
| 4843 | 4B | 73050 | IWB73050 | Tdurum_contig66820_466    | 43.1 |
| 4844 | 4B | 72003 | IWB72003 | Tdurum_contig4974_1725    | 43.1 |
| 4845 | 4B | 71607 | IWB71607 | Tdurum_contig45395_218    | 43.1 |
| 4846 | 4B | 35101 | IWB35101 | IAAV5831                  | 43.1 |
| 4847 | 4B | 71002 | IWB71002 | Tdurum_contig42211_2142   | 43.1 |
| 4848 | 4B | 9760  | IWB9760  | BS00066270_51             | 43.1 |
| 4849 | 4B | 71003 | IWB71003 | Tdurum_contig42211_2280   | 43.1 |
| 4850 | 4B | 71000 | IWB71000 | Tdurum_contig42211_1634   | 43.1 |
| 4851 | 4B | 72001 | IWB72001 | Tdurum_contig4974_1105    | 43.1 |
| 4852 | 4B | 71001 | IWB71001 | Tdurum_contig42211_1897   | 43.1 |
| 4853 | 4B | 69537 | IWB69537 | Tdurum_contig28490_463    | 43.1 |
| 4854 | 4B | 36244 | IWB36244 | IACX7819                  | 43.1 |
| 4855 | 4B | 6015  | IWB6015  | BS00007684_51             | 43.1 |

|      |    |       |          |                           |      |
|------|----|-------|----------|---------------------------|------|
| 4856 | 4B | 6658  | IWB6658  | BS00018707_51             | 43.1 |
| 4857 | 4B | 35533 | IWB35533 | IAAV8767                  | 43.1 |
| 4858 | 4B | 49151 | IWB49151 | Kukri_rep_c106163_170     | 43.1 |
| 4859 | 4B | 73856 | IWB73856 | Tdurum_contig93168_52     | 43.1 |
| 4860 | 4B | 72852 | IWB72852 | Tdurum_contig62016_241    | 43.1 |
| 4861 | 4B | 7160  | IWB7160  | BS00022576_51             | 43.1 |
| 4862 | 4B | 73026 | IWB73026 | Tdurum_contig65570_163    | 43.1 |
| 4863 | 4B | 72187 | IWB72187 | Tdurum_contig51555_568    | 43.1 |
| 4864 | 4B | 72002 | IWB72002 | Tdurum_contig4974_1386    | 43.1 |
| 4865 | 4B | 72010 | IWB72010 | Tdurum_contig4974_486     | 43.1 |
| 4866 | 4B | 7594  | IWB7594  | BS00025819_51             | 43.1 |
| 4867 | 4B | 67738 | IWB67738 | Tdurum_contig12801_136    | 43.4 |
| 4868 | 4B | 28112 | IWB28112 | Excalibur_c6227_1073      | 43.4 |
| 4869 | 4B | 75563 | IWA327   | wsnp_BE499456B_Ta_1_1     | 43.4 |
| 4870 | 4B | 24398 | IWB24398 | Excalibur_c26046_293      | 43.4 |
| 4871 | 4B | 73207 | IWB73207 | Tdurum_contig71721_147    | 43.4 |
| 4872 | 4B | 42379 | IWB42379 | Kukri_c20822_1029         | 43.4 |
| 4873 | 4B | 72885 | IWB72885 | Tdurum_contig62310_490    | 43.4 |
| 4874 | 4B | 10265 | IWB10265 | BS00068242_51             | 43.4 |
| 4875 | 4B | 71418 | IWB71418 | Tdurum_contig43393_1012   | 43.4 |
| 4876 | 4B | 74043 | IWB74043 | Tdurum_contig98478_494    | 43.4 |
| 4877 | 4B | 73701 | IWB73701 | Tdurum_contig85933_153    | 43.4 |
| 4878 | 4B | 74042 | IWB74042 | Tdurum_contig98478_400    | 43.4 |
| 4879 | 4B | 70250 | IWB70250 | Tdurum_contig31451_173    | 43.4 |
| 4880 | 4B | 69165 | IWB69165 | Tdurum_contig25698_123    | 43.4 |
| 4881 | 4B | 72884 | IWB72884 | Tdurum_contig62310_265    | 43.4 |
| 4882 | 4B | 72225 | IWB72225 | Tdurum_contig51996_894    | 44.2 |
| 4883 | 4B | 26492 | IWB26492 | Excalibur_c4380_1046      | 44.2 |
| 4884 | 4B | 58216 | IWB58216 | RAC875_c46131_146         | 44.2 |
| 4885 | 4B | 29759 | IWB29759 | Excalibur_rep_c101791_575 | 44.2 |
| 4886 | 4B | 80    | IWB80    | BobWhite_c10574_193       | 44.2 |
| 4887 | 4B | 3352  | IWB3352  | BobWhite_c44165_388       | 44.2 |
| 4888 | 4B | 45291 | IWB45291 | Kukri_c42851_60           | 44.2 |
| 4889 | 4B | 45500 | IWB45500 | Kukri_c44967_60           | 44.2 |
| 4890 | 4B | 46169 | IWB46169 | Kukri_c5149_2346          | 44.2 |
| 4891 | 4B | 68259 | IWB68259 | Tdurum_contig14562_607    | 44.2 |
| 4892 | 4B | 35870 | IWB35870 | IACX269                   | 44.2 |
| 4893 | 4B | 27331 | IWB27331 | Excalibur_c52718_1059     | 44.2 |
| 4894 | 4B | 36408 | IWB36408 | Jagger_c10182_85          | 44.2 |
| 4895 | 4B | 40811 | IWB40811 | Kukri_c12398_863          | 44.2 |
| 4896 | 4B | 65875 | IWB65875 | TA004717-0646             | 44.2 |
| 4897 | 4B | 70752 | IWB70752 | Tdurum_contig42038_2589   | 44.2 |
| 4898 | 4B | 70755 | IWB70755 | Tdurum_contig42038_596    | 44.2 |
| 4899 | 4B | 70750 | IWB70750 | Tdurum_contig42038_1770   | 44.2 |
| 4900 | 4B | 70754 | IWB70754 | Tdurum_contig42038_2826   | 44.2 |
| 4901 | 4B | 57047 | IWB57047 | RAC875_c35152_372         | 44.2 |
| 4902 | 4B | 58174 | IWB58174 | RAC875_c45747_87          | 44.2 |
| 4903 | 4B | 72118 | IWB72118 | Tdurum_contig50769_1404   | 44.2 |
| 4904 | 4B | 32822 | IWB32822 | GENE-2129_76              | 44.2 |
| 4905 | 4B | 73115 | IWB73115 | Tdurum_contig68671_492    | 44.2 |
| 4906 | 4B | 61533 | IWB61533 | RAC875_rep_c105972_613    | 44.2 |
| 4907 | 4B | 41751 | IWB41751 | Kukri_c17377_1826         | 44.2 |
| 4908 | 4B | 57889 | IWB57889 | RAC875_c42948_311         | 44.2 |
| 4909 | 4B | 43495 | IWB43495 | Kukri_c27822_55           | 44.2 |

|      |    |       |          |                             |      |
|------|----|-------|----------|-----------------------------|------|
| 4910 | 4B | 68468 | IWB68468 | Tdurum_contig15827_321      | 44.2 |
| 4911 | 4B | 67330 | IWB67330 | Tdurum_contig11874_214      | 44.2 |
| 4912 | 4B | 70063 | IWB70063 | Tdurum_contig30603_99       | 44.2 |
| 4913 | 4B | 71186 | IWB71186 | Tdurum_contig42488_405      | 44.2 |
| 4914 | 4B | 68348 | IWB68348 | Tdurum_contig15091_464      | 44.2 |
| 4915 | 4B | 66569 | IWB66569 | Tdurum_contig10529_614      | 44.2 |
| 4916 | 4B | 70751 | IWB70751 | Tdurum_contig42038_2184     | 44.2 |
| 4917 | 4B | 70749 | IWB70749 | Tdurum_contig42038_1736     | 44.2 |
| 4918 | 4B | 73930 | IWB73930 | Tdurum_contig95221_322      | 44.2 |
| 4919 | 4B | 77160 | IWA2591  | wsnp_Ex_c21217_30347572     | 44.2 |
| 4920 | 4B | 44029 | IWB44029 | Kukri_c31831_551            | 44.2 |
| 4921 | 4B | 69705 | IWB69705 | Tdurum_contig29095_500      | 44.2 |
| 4922 | 4B | 70484 | IWB70484 | Tdurum_contig34076_265      | 44.2 |
| 4923 | 4B | 70047 | IWB70047 | Tdurum_contig30545_715      | 44.2 |
| 4924 | 4B | 31053 | IWB31053 | Excalibur_rep_c69304_402    | 44.2 |
| 4925 | 4B | 53379 | IWB53379 | RAC875_c11649_853           | 44.2 |
| 4926 | 4B | 35802 | IWB35802 | IACX1853                    | 44.2 |
| 4927 | 4B | 14379 | IWB14379 | CAP7_rep_c12626_209         | 44.2 |
| 4928 | 4B | 43967 | IWB43967 | Kukri_c31350_287            | 44.2 |
| 4929 | 4B | 69181 | IWB69181 | Tdurum_contig25780_273      | 44.2 |
| 4930 | 4B | 28667 | IWB28667 | Excalibur_c7343_57          | 44.7 |
| 4931 | 4B | 27487 | IWB27487 | Excalibur_c54493_105        | 45.0 |
| 4932 | 4B | 32941 | IWB32941 | GENE-2463_273               | 45.3 |
| 4933 | 4B | 78565 | IWA4429  | wsnp_Ex_c6129_10723211      | 45.3 |
| 4934 | 4B | 36179 | IWB36179 | IACX69                      | 45.6 |
| 4935 | 4B | 63293 | IWB63293 | RAC875_rep_c91551_80        | 45.6 |
| 4936 | 4B | 58952 | IWB58952 | RAC875_c5351_780            | 45.6 |
| 4937 | 4B | 49431 | IWB49431 | Kukri_rep_c110025_90        | 45.6 |
| 4938 | 4B | 72265 | IWB72265 | Tdurum_contig52356_517      | 45.9 |
| 4939 | 4B | 72287 | IWB72287 | Tdurum_contig52805_183      | 45.9 |
| 4940 | 4B | 72288 | IWB72288 | Tdurum_contig52805_250      | 45.9 |
| 4941 | 4B | 72399 | IWB72399 | Tdurum_contig54854_547      | 48.8 |
| 4942 | 4B | 44068 | IWB44068 | Kukri_c322_1394             | 52.0 |
| 4943 | 4B | 9672  | IWB9672  | BS00065922_51               | 52.0 |
| 4944 | 4B | 40589 | IWB40589 | Kukri_c11415_1074           | 52.3 |
| 4945 | 4B | 7195  | IWB7195  | BS00022653_51               | 52.9 |
| 4946 | 4B | 67166 | IWB67166 | Tdurum_contig11593_170      | 52.9 |
| 4947 | 4B | 23684 | IWB23684 | Excalibur_c21727_851        | 52.9 |
| 4948 | 4B | 81482 | IWA8443  | wsnp_RFL_Contig3236_3262140 | 52.9 |
| 4949 | 4B | 39484 | IWB39484 | Ku_c462_1417                | 53.7 |
| 4950 | 4B | 39342 | IWB39342 | Ku_c39003_290               | 53.7 |
| 4951 | 4B | 25207 | IWB25207 | Excalibur_c32467_676        | 53.7 |
| 4952 | 4B | 26975 | IWB26975 | Excalibur_c48668_341        | 53.7 |
| 4953 | 4B | 55797 | IWB55797 | RAC875_c2545_1127           | 53.7 |
| 4954 | 4B | 70853 | IWB70853 | Tdurum_contig42107_1978     | 53.7 |
| 4955 | 4B | 60481 | IWB60481 | RAC875_c77652_348           | 53.7 |
| 4956 | 4B | 69695 | IWB69695 | Tdurum_contig29060_176      | 53.7 |
| 4957 | 4B | 32927 | IWB32927 | GENE-2422_208               | 53.7 |
| 4958 | 4B | 40899 | IWB40899 | Kukri_c12814_763            | 53.7 |
| 4959 | 4B | 54642 | IWB54642 | RAC875_c1828_1130           | 53.7 |
| 4960 | 4B | 57491 | IWB57491 | RAC875_c39226_131           | 53.7 |
| 4961 | 4B | 69664 | IWB69664 | Tdurum_contig28920_296      | 53.7 |
| 4962 | 4B | 70299 | IWB70299 | Tdurum_contig31737_203      | 53.7 |
| 4963 | 4B | 73144 | IWB73144 | Tdurum_contig69157_448      | 53.7 |

|      |    |       |          |                          |      |
|------|----|-------|----------|--------------------------|------|
| 4964 | 4B | 73855 | IWB73855 | Tdurum_contig93160_155   | 53.7 |
| 4965 | 4B | 77761 | IWA3396  | wsnp_Ex_c32500_41144083  | 53.7 |
| 4966 | 4B | 34846 | IWB34846 | IAAV4191                 | 53.7 |
| 4967 | 4B | 63149 | IWB63149 | RAC875_rep_c79201_153    | 53.7 |
| 4968 | 4B | 81016 | IWA7752  | wsnp_Ra_c22026_31453420  | 53.7 |
| 4969 | 4B | 154   | IWB154   | BobWhite_c11005_236      | 53.7 |
| 4970 | 4B | 21439 | IWB21439 | Ex_c9296_605             | 53.7 |
| 4971 | 4B | 35570 | IWB35570 | IAAV8975                 | 53.7 |
| 4972 | 4B | 41569 | IWB41569 | Kukri_c16392_1468        | 53.7 |
| 4973 | 4B | 78730 | IWA4640  | wsnp_Ex_c72198_70679871  | 53.7 |
| 4974 | 4B | 6562  | IWB6562  | BS00012457_51            | 53.7 |
| 4975 | 4B | 52053 | IWB52053 | Ra_c41921_1056           | 53.7 |
| 4976 | 4B | 58303 | IWB58303 | RAC875_c47018_72         | 53.7 |
| 4977 | 4B | 63337 | IWB63337 | RAC875_rep_c95493_490    | 53.7 |
| 4978 | 4B | 35049 | IWB35049 | IAAV558                  | 53.7 |
| 4979 | 4B | 39883 | IWB39883 | Ku_c700_2585             | 53.7 |
| 4980 | 4B | 77276 | IWA2755  | wsnp_Ex_c22785_31991891  | 53.7 |
| 4981 | 4B | 77926 | IWA3608  | wsnp_Ex_c37437_45183193  | 53.7 |
| 4982 | 4B | 52420 | IWB52420 | Ra_c67368_1218           | 53.7 |
| 4983 | 4B | 62565 | IWB62565 | RAC875_rep_c69370_218    | 53.7 |
| 4984 | 4B | 71859 | IWB71859 | Tdurum_contig4795_439    | 53.7 |
| 4985 | 4B | 77882 | IWA3551  | wsnp_Ex_c35910_43971560  | 53.7 |
| 4986 | 4B | 65899 | IWB65899 | TA004905-0613            | 53.7 |
| 4987 | 4B | 50753 | IWB50753 | Ra_c10455_3226           | 53.7 |
| 4988 | 4B | 21440 | IWB21440 | Ex_c9296_858             | 53.7 |
| 4989 | 4B | 20288 | IWB20288 | Ex_c25467_796            | 53.7 |
| 4990 | 4B | 35187 | IWB35187 | IAAV6327                 | 53.7 |
| 4991 | 4B | 38423 | IWB38423 | Ku_c14007_1088           | 53.7 |
| 4992 | 4B | 51855 | IWB51855 | Ra_c32919_1154           | 53.7 |
| 4993 | 4B | 52054 | IWB52054 | Ra_c41921_951            | 53.7 |
| 4994 | 4B | 53588 | IWB53588 | RAC875_c12762_791        | 53.7 |
| 4995 | 4B | 75464 | IWA187   | wsnp_BE446161B_Td_2_2    | 53.7 |
| 4996 | 4B | 39627 | IWB39627 | Ku_c5611_1705            | 53.7 |
| 4997 | 4B | 72778 | IWB72778 | Tdurum_contig61302_347   | 53.7 |
| 4998 | 4B | 68802 | IWB68802 | Tdurum_contig194_182     | 53.7 |
| 4999 | 4B | 6739  | IWB6739  | BS00021722_51            | 53.7 |
| 5000 | 4B | 20289 | IWB20289 | Ex_c25467_851            | 53.7 |
| 5001 | 4B | 60954 | IWB60954 | RAC875_c89195_138        | 53.7 |
| 5002 | 4B | 76214 | IWA1382  | wsnp_Ex_c107075_90880218 | 53.7 |
| 5003 | 4B | 51856 | IWB51856 | Ra_c32919_1289           | 53.7 |
| 5004 | 4B | 70856 | IWB70856 | Tdurum_contig42107_2295  | 53.7 |
| 5005 | 4B | 39515 | IWB39515 | Ku_c48056_436            | 53.7 |
| 5006 | 4B | 39213 | IWB39213 | Ku_c3385_521             | 53.7 |
| 5007 | 4B | 49052 | IWB49052 | Kukri_rep_c104941_336    | 53.7 |
| 5008 | 4B | 51169 | IWB51169 | Ra_c15473_681            | 53.7 |
| 5009 | 4B | 71858 | IWB71858 | Tdurum_contig4795_404    | 53.7 |
| 5010 | 4B | 73462 | IWB73462 | Tdurum_contig7995_597    | 53.7 |
| 5011 | 4B | 470   | IWB470   | BobWhite_c13247_795      | 53.7 |
| 5012 | 4B | 73143 | IWB73143 | Tdurum_contig69157_375   | 53.7 |
| 5013 | 4B | 77928 | IWA3611  | wsnp_Ex_c37437_45184851  | 53.7 |
| 5014 | 4B | 38540 | IWB38540 | Ku_c16392_2687           | 53.7 |
| 5015 | 4B | 299   | IWB299   | BobWhite_c12067_311      | 53.7 |
| 5016 | 4B | 14529 | IWB14529 | CAP8_c1408_167           | 53.7 |
| 5017 | 4B | 13720 | IWB13720 | CAP7_c10839_300          | 53.7 |

|      |    |       |          |                         |      |
|------|----|-------|----------|-------------------------|------|
| 5018 | 4B | 76849 | IWA2171  | wsnp_Ex_c16825_25387841 | 54.2 |
| 5019 | 4B | 8082  | IWB8082  | BS00037020_51           | 54.2 |
| 5020 | 4B | 36379 | IWB36379 | IACX938                 | 55.1 |
| 5021 | 4B | 1224  | IWB1224  | BobWhite_c18861_292     | 55.1 |
| 5022 | 4B | 71804 | IWB71804 | Tdurum_contig47470_455  | 55.1 |
| 5023 | 4B | 12223 | IWB12223 | BS00104364_51           | 55.1 |
| 5024 | 4B | 26845 | IWB26845 | Excalibur_c47209_87     | 55.1 |
| 5025 | 4B | 42287 | IWB42287 | Kukri_c20236_209        | 55.1 |
| 5026 | 4B | 12276 | IWB12276 | BS00106144_51           | 55.1 |
| 5027 | 4B | 71580 | IWB71580 | Tdurum_contig45125_230  | 55.3 |
| 5028 | 4B | 21707 | IWB21707 | Excalibur_c106884_135   | 55.3 |
| 5029 | 4B | 66587 | IWB66587 | Tdurum_contig10551_648  | 55.3 |
| 5030 | 4B | 13200 | IWB13200 | CAP12_c1416_177         | 55.6 |
| 5031 | 4B | 44944 | IWB44944 | Kukri_c39699_271        | 55.9 |
| 5032 | 4B | 73113 | IWB73113 | Tdurum_contig68640_419  | 55.9 |
| 5033 | 4B | 23337 | IWB23337 | Excalibur_c19547_1012   | 55.9 |
| 5034 | 4B | 6048  | IWB6048  | BS00009342_51           | 55.9 |
| 5035 | 4B | 47105 | IWB47105 | Kukri_c6388_1030        | 55.9 |
| 5036 | 4B | 74077 | IWB74077 | Tdurum_contig9995_493   | 55.9 |
| 5037 | 4B | 15007 | IWB15007 | CAP8_rep_c3658_272      | 55.9 |
| 5038 | 4B | 69632 | IWB69632 | Tdurum_contig28796_163  | 55.9 |
| 5039 | 4B | 13070 | IWB13070 | CAP11_c8620_326         | 55.9 |
| 5040 | 4B | 72310 | IWB72310 | Tdurum_contig5327_470   | 55.9 |
| 5041 | 4B | 14158 | IWB14158 | CAP7_c5374_51           | 55.9 |
| 5042 | 4B | 60004 | IWB60004 | RAC875_c66141_332       | 56.2 |
| 5043 | 4B | 71666 | IWB71666 | Tdurum_contig46247_106  | 56.4 |
| 5044 | 4B | 71667 | IWB71667 | Tdurum_contig46247_300  | 56.4 |
| 5045 | 4B | 73383 | IWB73383 | Tdurum_contig76556_139  | 57.5 |
| 5046 | 4B | 72121 | IWB72121 | Tdurum_contig50783_67   | 57.8 |
| 5047 | 4B | 72120 | IWB72120 | Tdurum_contig50783_285  | 57.8 |
| 5048 | 4B | 77480 | IWA3038  | wsnp_Ex_c26285_35531324 | 57.8 |
| 5049 | 4B | 71883 | IWB71883 | Tdurum_contig48366_1324 | 57.8 |
| 5050 | 4B | 77481 | IWA3039  | wsnp_Ex_c26285_35531493 | 57.8 |
| 5051 | 4B | 47537 | IWB47537 | Kukri_c7241_322         | 57.8 |
| 5052 | 4B | 77484 | IWA3042  | wsnp_Ex_c26285_35532440 | 57.8 |
| 5053 | 4B | 45303 | IWB45303 | Kukri_c4309_407         | 57.8 |
| 5054 | 4B | 77483 | IWA3041  | wsnp_Ex_c26285_35531618 | 57.8 |
| 5055 | 4B | 52254 | IWB52254 | Ra_c5508_706            | 57.8 |
| 5056 | 4B | 6506  | IWB6506  | BS00012006_51           | 57.8 |
| 5057 | 4B | 69929 | IWB69929 | Tdurum_contig29960_91   | 58.1 |
| 5058 | 4B | 71654 | IWB71654 | Tdurum_contig45927_663  | 58.1 |
| 5059 | 4B | 69928 | IWB69928 | Tdurum_contig29960_214  | 58.1 |
| 5060 | 4B | 70997 | IWB70997 | Tdurum_contig42208_263  | 58.1 |
| 5061 | 4B | 56768 | IWB56768 | RAC875_c32826_485       | 58.1 |
| 5062 | 4B | 71655 | IWB71655 | Tdurum_contig45927_677  | 58.1 |
| 5063 | 4B | 61575 | IWB61575 | RAC875_rep_c106322_1091 | 58.1 |
| 5064 | 4B | 73996 | IWB73996 | Tdurum_contig97499_167  | 58.1 |
| 5065 | 4B | 45215 | IWB45215 | Kukri_c4221_1114        | 58.1 |
| 5066 | 4B | 65141 | IWB65141 | RFL_Contig5869_863      | 58.1 |
| 5067 | 4B | 73935 | IWB73935 | Tdurum_contig95381_152  | 58.1 |
| 5068 | 4B | 66095 | IWB66095 | TA011464-0382           | 58.1 |
| 5069 | 4B | 17020 | IWB17020 | D_contig66253_864       | 58.1 |
| 5070 | 4B | 73585 | IWB73585 | Tdurum_contig82603_67   | 58.1 |
| 5071 | 4B | 73629 | IWB73629 | Tdurum_contig8334_1228  | 58.1 |

|      |    |       |          |                             |      |
|------|----|-------|----------|-----------------------------|------|
| 5072 | 4B | 73630 | IWB73630 | Tdurum_contig8334_932       | 58.1 |
| 5073 | 4B | 20754 | IWB20754 | Ex_c45493_761               | 63.2 |
| 5074 | 4B | 77665 | IWA3279  | wsnp_Ex_c30473_39386277     | 63.7 |
| 5075 | 4B | 6828  | IWB6828  | BS00021969_51               | 64.0 |
| 5076 | 4B | 55667 | IWB55667 | RAC875_c24515_602           | 64.0 |
| 5077 | 4B | 72883 | IWB72883 | Tdurum_contig62286_271      | 64.0 |
| 5078 | 4B | 34604 | IWB34604 | IAAV2725                    | 64.0 |
| 5079 | 4B | 29649 | IWB29649 | Excalibur_c9901_251         | 64.0 |
| 5080 | 4B | 29648 | IWB29648 | Excalibur_c9901_163         | 64.0 |
| 5081 | 4B | 11229 | IWB11229 | BS00082063_51               | 64.0 |
| 5082 | 4B | 73977 | IWB73977 | Tdurum_contig97207_435      | 66.7 |
| 5083 | 4B | 32544 | IWB32544 | GENE-1584_692               | 67.5 |
| 5084 | 4B | 45457 | IWB45457 | Kukri_c44559_429            | 68.7 |
| 5085 | 4B | 33076 | IWB33076 | GENE-2826_154               | 69.2 |
| 5086 | 4B | 35551 | IWB35551 | IAAV8848                    | 69.2 |
| 5087 | 4B | 33077 | IWB33077 | GENE-2826_325               | 69.2 |
| 5088 | 4B | 26089 | IWB26089 | Excalibur_c39876_403        | 69.8 |
| 5089 | 4B | 50363 | IWB50363 | Kukri_rep_c78644_408        | 69.8 |
| 5090 | 4B | 75098 | IWB75098 | tplb0056b15_858             | 69.8 |
| 5091 | 4B | 22176 | IWB22176 | Excalibur_c12937_64         | 69.8 |
| 5092 | 4B | 72184 | IWB72184 | Tdurum_contig51521_90       | 70.0 |
| 5093 | 4B | 74188 | IWB74188 | tplb0024i19_322             | 70.3 |
| 5094 | 4B | 77162 | IWA2595  | wsnp_Ex_c21293_30421496     | 70.9 |
| 5095 | 4B | 11859 | IWB11859 | BS00094252_51               | 70.9 |
| 5096 | 4B | 30656 | IWB30656 | Excalibur_rep_c114140_567   | 70.9 |
| 5097 | 4B | 35505 | IWB35505 | IAAV8622                    | 70.9 |
| 5098 | 4B | 79344 | IWA5408  | wsnp_Ex_rep_c67510_66116823 | 70.9 |
| 5099 | 4B | 80057 | IWA6465  | wsnp_Ku_c12557_20249122     | 70.9 |
| 5100 | 4B | 74054 | IWB74054 | Tdurum_contig9893_492       | 70.9 |
| 5101 | 4B | 7266  | IWB7266  | BS00022808_51               | 70.9 |
| 5102 | 4B | 48353 | IWB48353 | Kukri_c93922_206            | 71.1 |
| 5103 | 4B | 3246  | IWB3246  | BobWhite_c4256_213          | 73.7 |
| 5104 | 4B | 4447  | IWB4447  | BobWhite_c8266_510          | 73.7 |
| 5105 | 4B | 44213 | IWB44213 | Kukri_c33550_601            | 73.7 |
| 5106 | 4B | 4448  | IWB4448  | BobWhite_c8266_582          | 73.7 |
| 5107 | 4B | 48622 | IWB48622 | Kukri_rep_c101259_81        | 74.0 |
| 5108 | 4B | 17522 | IWB17522 | D_F5XZDLF01C3B2R_358        | 74.0 |
| 5109 | 4B | 75726 | IWA564   | wsnp_BG604404B_Ta_2_1       | 74.0 |
| 5110 | 4B | 48621 | IWB48621 | Kukri_rep_c101259_159       | 74.0 |
| 5111 | 4B | 27735 | IWB27735 | Excalibur_c57603_523        | 74.0 |
| 5112 | 4B | 32863 | IWB32863 | GENE-2278_444               | 74.0 |
| 5113 | 4B | 12222 | IWB12222 | BS00104279_51               | 74.0 |
| 5114 | 4B | 35335 | IWB35335 | IAAV7394                    | 76.6 |
| 5115 | 4B | 6021  | IWB6021  | BS00008627_51               | 78.6 |
| 5116 | 4B | 8859  | IWB8859  | BS00062304_51               | 79.1 |
| 5117 | 4B | 57507 | IWB57507 | RAC875_c39339_400           | 83.0 |
| 5118 | 4B | 7958  | IWB7958  | BS00034148_51               | 83.3 |
| 5119 | 4B | 7957  | IWB7957  | BS00034147_51               | 83.3 |
| 5120 | 4D | 15465 | IWB15465 | D_contig08192_385           | 0.0  |
| 5121 | 4D | 47181 | IWB47181 | Kukri_c64744_698            | 0.6  |
| 5122 | 4D | 19937 | IWB19937 | Ex_c16174_681               | 0.6  |
| 5123 | 4D | 6670  | IWB6670  | BS00019676_51               | 0.6  |
| 5124 | 4D | 34423 | IWB34423 | IAAV1674                    | 0.6  |
| 5125 | 4D | 53820 | IWB53820 | RAC875_c13945_597           | 20.7 |

|      |    |       |          |                             |       |
|------|----|-------|----------|-----------------------------|-------|
| 5126 | 4D | 41974 | IWB41974 | Kukri_c18444_266            | 30.8  |
| 5127 | 4D | 75865 | IWA752   | wsnp_CAP11_c356_280910      | 34.0  |
| 5128 | 4D | 15038 | IWB15038 | CAP8_rep_c5023_658          | 34.0  |
| 5129 | 4D | 60685 | IWB60685 | RAC875_c8234_293            | 34.5  |
| 5130 | 4D | 30733 | IWB30733 | Excalibur_rep_c66353_598    | 38.3  |
| 5131 | 4D | 20608 | IWB20608 | Ex_c3802_71                 | 39.4  |
| 5132 | 4D | 25533 | IWB25533 | Excalibur_c34923_401        | 39.7  |
| 5133 | 4D | 15933 | IWB15933 | D_contig18653_123           | 44.0  |
| 5134 | 4D | 65603 | IWB65603 | TA002774-0685               | 46.9  |
| 5135 | 4D | 24500 | IWB24500 | Excalibur_c26894_241        | 48.0  |
| 5136 | 4D | 15342 | IWB15342 | D_contig05193_283           | 48.0  |
| 5137 | 4D | 74489 | IWB74489 | tplb0033b01_1188            | 48.0  |
| 5138 | 4D | 81459 | IWA8399  | wsnp_RFL_Contig2828_2623246 | 48.0  |
| 5139 | 4D | 61338 | IWB61338 | RAC875_rep_c102406_829      | 48.0  |
| 5140 | 4D | 18434 | IWB18434 | D_GBF1XID02GDJWC_235        | 48.0  |
| 5141 | 4D | 55348 | IWB55348 | RAC875_c22484_712           | 48.0  |
| 5142 | 4D | 17357 | IWB17357 | D_F1BEJMU02HWGDP_164        | 48.0  |
| 5143 | 4D | 16325 | IWB16325 | D_contig27646_358           | 48.0  |
| 5144 | 4D | 16427 | IWB16427 | D_contig29825_215           | 48.0  |
| 5145 | 4D | 65609 | IWB65609 | TA002864-0595               | 48.0  |
| 5146 | 4D | 62719 | IWB62719 | RAC875_rep_c70720_775       | 49.7  |
| 5147 | 4D | 75631 | IWA430   | wsnp_BF202706D_Ta_1_1       | 49.7  |
| 5148 | 4D | 27974 | IWB27974 | Excalibur_c6055_1930        | 50.5  |
| 5149 | 4D | 57638 | IWB57638 | RAC875_c40619_130           | 51.7  |
| 5150 | 4D | 40326 | IWB40326 | Kukri_c10365_1062           | 51.7  |
| 5151 | 4D | 28812 | IWB28812 | Excalibur_c7672_364         | 52.5  |
| 5152 | 4D | 18825 | IWB18825 | D_GCE8AKX01D6EGT_63         | 54.2  |
| 5153 | 4D | 17169 | IWB17169 | D_contig75565_413           | 54.2  |
| 5154 | 4D | 76775 | IWA2080  | wsnp_Ex_c15977_24392258     | 54.2  |
| 5155 | 4D | 17561 | IWB17561 | D_F5XZDLF01DLRB6_99         | 54.2  |
| 5156 | 4D | 81519 | IWA8514  | wsnp_RFL_Contig3792_4086706 | 54.8  |
| 5157 | 4D | 75531 | IWA286   | wsnp_BE497160D_Ta_2_1       | 61.8  |
| 5158 | 4D | 29166 | IWB29166 | Excalibur_c864_502          | 63.7  |
| 5159 | 4D | 36129 | IWB36129 | IACX624                     | 67.3  |
| 5160 | 4D | 35805 | IWB35805 | IACX1867                    | 67.3  |
| 5161 | 4D | 65535 | IWB65535 | TA002331-0702               | 67.3  |
| 5162 | 4D | 30184 | IWB30184 | Excalibur_rep_c106172_225   | 67.3  |
| 5163 | 4D | 35721 | IWB35721 | IACX1215                    | 67.3  |
| 5164 | 4D | 16381 | IWB16381 | D_contig28771_74            | 67.3  |
| 5165 | 4D | 75594 | IWA382   | wsnp_BE591739D_Ta_2_3       | 67.3  |
| 5166 | 4D | 28897 | IWB28897 | Excalibur_c79009_131        | 82.8  |
| 5167 | 4D | 9285  | IWB9285  | BS00064447_51               | 88.2  |
| 5168 | 4D | 15650 | IWB15650 | D_contig12389_982           | 88.2  |
| 5169 | 4D | 43325 | IWB43325 | Kukri_c26670_493            | 88.2  |
| 5170 | 4D | 19222 | IWB19222 | D_GDRF1KQ02H66WD_341        | 97.0  |
| 5171 | 4D | 49126 | IWB49126 | Kukri_rep_c105952_87        | 97.0  |
| 5172 | 4D | 39068 | IWB39068 | Ku_c2885_1277               | 114.1 |
| 5173 | 4D | 2170  | IWB2170  | BobWhite_c28101_376         | 114.9 |
| 5174 | 5A | 4290  | IWB4290  | BobWhite_c7114_237          | 0.0   |
| 5175 | 5A | 78576 | IWA4445  | wsnp_Ex_c6209_10838456      | 1.1   |
| 5176 | 5A | 65889 | IWB65889 | TA004832-0873               | 1.7   |
| 5177 | 5A | 77894 | IWA3566  | wsnp_Ex_c3620_6612231       | 2.5   |
| 5178 | 5A | 79712 | IWA5923  | wsnp_JD_c2128_2930150       | 3.1   |
| 5179 | 5A | 77895 | IWA3567  | wsnp_Ex_c3620_6612294       | 3.1   |



|      |    |       |          |                              |      |
|------|----|-------|----------|------------------------------|------|
| 5180 | 5A | 55024 | IWB55024 | RAC875_c2061_55              | 6.7  |
| 5181 | 5A | 23799 | IWB23799 | Excalibur_c22411_690         | 6.7  |
| 5182 | 5A | 76829 | IWA2145  | wsnp_Ex_c16551_25061517      | 11.8 |
| 5183 | 5A | 9216  | IWB9216  | BS00064188_51                | 12.1 |
| 5184 | 5A | 6912  | IWB6912  | BS00022116_51                | 12.1 |
| 5185 | 5A | 28466 | IWB28466 | Excalibur_c6714_246          | 14.5 |
| 5186 | 5A | 65732 | IWB65732 | TA003745-0632                | 15.3 |
| 5187 | 5A | 34611 | IWB34611 | IAAV2776                     | 15.3 |
| 5188 | 5A | 64849 | IWB64849 | RFL_Contig4979_4240          | 15.3 |
| 5189 | 5A | 66053 | IWB66053 | TA006089-0703                | 15.9 |
| 5190 | 5A | 80733 | IWA7361  | wsnp_Ku_c9559_16000086       | 21.8 |
| 5191 | 5A | 80732 | IWA7360  | wsnp_Ku_c9559_15999945       | 21.8 |
| 5192 | 5A | 7817  | IWB7817  | BS00031073_51                | 21.8 |
| 5193 | 5A | 77595 | IWA3196  | wsnp_Ex_c28908_37989067      | 23.3 |
| 5194 | 5A | 79056 | IWA5053  | wsnp_Ex_rep_c102143_87374435 | 23.3 |
| 5195 | 5A | 4171  | IWB4171  | BobWhite_c6468_104           | 23.3 |
| 5196 | 5A | 50392 | IWB50392 | Kukri_rep_c80571_265         | 23.3 |
| 5197 | 5A | 77596 | IWA3197  | wsnp_Ex_c28908_37989320      | 23.3 |
| 5198 | 5A | 5245  | IWB5245  | BobWhite_rep_c60372_388      | 23.3 |
| 5199 | 5A | 80056 | IWA6463  | wsnp_Ku_c1254_2498515        | 23.3 |
| 5200 | 5A | 11440 | IWB11440 | BS00086096_51                | 23.3 |
| 5201 | 5A | 56409 | IWB56409 | RAC875_c30001_200            | 23.3 |
| 5202 | 5A | 79315 | IWA5368  | wsnp_Ex_rep_c67179_65674582  | 30.6 |
| 5203 | 5A | 35357 | IWB35357 | IAAV7519                     | 31.1 |
| 5204 | 5A | 11853 | IWB11853 | BS00094095_51                | 32.8 |
| 5205 | 5A | 10967 | IWB10967 | BS00077879_51                | 32.8 |
| 5206 | 5A | 33331 | IWB33331 | GENE-3321_201                | 33.4 |
| 5207 | 5A | 23035 | IWB23035 | Excalibur_c17904_437         | 33.7 |
| 5208 | 5A | 30698 | IWB30698 | Excalibur_rep_c115510_314    | 33.7 |
| 5209 | 5A | 65602 | IWB65602 | TA002772-0920                | 33.7 |
| 5210 | 5A | 64449 | IWB64449 | RFL_Contig3674_847           | 33.7 |
| 5211 | 5A | 77739 | IWA3365  | wsnp_Ex_c31830_40573624      | 33.7 |
| 5212 | 5A | 12627 | IWB12627 | BS00111119_51                | 33.7 |
| 5213 | 5A | 76028 | IWA1062  | wsnp_CAP7_c2282_1107112      | 33.7 |
| 5214 | 5A | 48151 | IWB48151 | Kukri_c8835_112              | 33.7 |
| 5215 | 5A | 40035 | IWB40035 | Ku_c7910_1651                | 33.7 |
| 5216 | 5A | 78284 | IWA4069  | wsnp_Ex_c5013_8914160        | 33.7 |
| 5217 | 5A | 61904 | IWB61904 | RAC875_rep_c109661_107       | 33.7 |
| 5218 | 5A | 79495 | IWA5615  | wsnp_Ex_rep_c69526_68472787  | 33.7 |
| 5219 | 5A | 76999 | IWA2378  | wsnp_Ex_c19134_28056012      | 33.7 |
| 5220 | 5A | 72119 | IWB72119 | Tdurum_contig50779_383       | 33.7 |
| 5221 | 5A | 41931 | IWB41931 | Kukri_c18268_79              | 33.7 |
| 5222 | 5A | 48152 | IWB48152 | Kukri_c8835_579              | 33.7 |
| 5223 | 5A | 78080 | IWA3811  | wsnp_Ex_c4211_7606269        | 33.7 |
| 5224 | 5A | 52605 | IWB52605 | Ra_c7322_2294                | 33.7 |
| 5225 | 5A | 4848  | IWB4848  | BobWhite_rep_c50145_387      | 33.9 |
| 5226 | 5A | 8252  | IWB8252  | BS00040933_51                | 33.9 |
| 5227 | 5A | 79581 | IWA5728  | wsnp_Ex_rep_c71219_70023450  | 33.9 |
| 5228 | 5A | 59634 | IWB59634 | RAC875_c61887_194            | 34.5 |
| 5229 | 5A | 68312 | IWB68312 | Tdurum_contig14863_916       | 37.4 |
| 5230 | 5A | 43006 | IWB43006 | Kukri_c24642_426             | 38.0 |
| 5231 | 5A | 25073 | IWB25073 | Excalibur_c31194_404         | 38.8 |
| 5232 | 5A | 32340 | IWB32340 | GENE-1265_290                | 39.1 |
| 5233 | 5A | 75913 | IWA825   | wsnp_CAP11_c951_572693       | 39.4 |

|      |    |       |          |                             |      |
|------|----|-------|----------|-----------------------------|------|
| 5234 | 5A | 46908 | IWB46908 | Kukri_c61108_900            | 40.2 |
| 5235 | 5A | 66960 | IWB66960 | Tdurum_contig11173_79       | 42.0 |
| 5236 | 5A | 61548 | IWB61548 | RAC875_rep_c106118_339      | 42.0 |
| 5237 | 5A | 9955  | IWB9955  | BS00067096_51               | 42.0 |
| 5238 | 5A | 76689 | IWA1973  | wsnp_Ex_c15046_23216392     | 42.2 |
| 5239 | 5A | 25262 | IWB25262 | Excalibur_c32833_466        | 42.2 |
| 5240 | 5A | 27070 | IWB27070 | Excalibur_c4964_275         | 42.2 |
| 5241 | 5A | 11167 | IWB11167 | BS00081120_51               | 42.2 |
| 5242 | 5A | 77864 | IWA3530  | wsnp_Ex_c356_698872         | 42.2 |
| 5243 | 5A | 80508 | IWA7061  | wsnp_Ku_c4389_7970859       | 42.2 |
| 5244 | 5A | 63885 | IWB63885 | RFL_Contig2251_434          | 43.1 |
| 5245 | 5A | 81308 | IWA8154  | wsnp_Ra_rep_c69221_66574148 | 44.8 |
| 5246 | 5A | 79947 | IWA6287  | wsnp_JD_rep_c61843_39601402 | 44.8 |
| 5247 | 5A | 52454 | IWB52454 | Ra_c69221_1167              | 44.8 |
| 5248 | 5A | 77589 | IWA3190  | wsnp_Ex_c28827_37918346     | 44.8 |
| 5249 | 5A | 7718  | IWB7718  | BS00029347_51               | 48.1 |
| 5250 | 5A | 10981 | IWB10981 | BS00077990_51               | 48.1 |
| 5251 | 5A | 8401  | IWB8401  | BS00045473_51               | 48.1 |
| 5252 | 5A | 51581 | IWB51581 | Ra_c24707_827               | 48.1 |
| 5253 | 5A | 81037 | IWA7777  | wsnp_Ra_c24707_34262900     | 48.1 |
| 5254 | 5A | 8266  | IWB8266  | BS00041219_51               | 48.1 |
| 5255 | 5A | 76153 | IWA1301  | wsnp_Ex_c10231_16783750     | 48.4 |
| 5256 | 5A | 31051 | IWB31051 | Excalibur_rep_c69282_651    | 49.2 |
| 5257 | 5A | 73385 | IWB73385 | Tdurum_contig76578_537      | 49.2 |
| 5258 | 5A | 80724 | IWA7351  | wsnp_Ku_c933_1913402        | 49.2 |
| 5259 | 5A | 79428 | IWA5521  | wsnp_Ex_rep_c68269_67060931 | 49.2 |
| 5260 | 5A | 77077 | IWA2480  | wsnp_Ex_c19892_28910730     | 49.2 |
| 5261 | 5A | 79409 | IWA5496  | wsnp_Ex_rep_c68117_66883366 | 49.2 |
| 5262 | 5A | 8975  | IWB8975  | BS00062996_51               | 50.1 |
| 5263 | 5A | 27297 | IWB27297 | Excalibur_c52165_93         | 50.1 |
| 5264 | 5A | 78786 | IWA4710  | wsnp_Ex_c7668_13089715      | 50.3 |
| 5265 | 5A | 78806 | IWA4736  | wsnp_Ex_c7841_13337935      | 50.3 |
| 5266 | 5A | 76811 | IWA2120  | wsnp_Ex_c16317_24795290     | 50.3 |
| 5267 | 5A | 40883 | IWB40883 | Kukri_c12738_882            | 50.3 |
| 5268 | 5A | 81559 | IWA8582  | wsnp_RFL_Contig4307_5006558 | 50.9 |
| 5269 | 5A | 77068 | IWA2467  | wsnp_Ex_c19820_28829623     | 51.2 |
| 5270 | 5A | 61543 | IWB61543 | RAC875_rep_c106044_137      | 51.2 |
| 5271 | 5A | 30993 | IWB30993 | Excalibur_rep_c68784_1193   | 51.5 |
| 5272 | 5A | 26943 | IWB26943 | Excalibur_c4834_1733        | 52.0 |
| 5273 | 5A | 4824  | IWB4824  | BobWhite_rep_c49979_373     | 52.0 |
| 5274 | 5A | 2909  | IWB2909  | BobWhite_c37466_227         | 52.0 |
| 5275 | 5A | 76667 | IWA1943  | wsnp_Ex_c14812_22928900     | 52.0 |
| 5276 | 5A | 53023 | IWB53023 | RAC875_c103787_233          | 52.0 |
| 5277 | 5A | 29431 | IWB29431 | Excalibur_c9356_783         | 52.0 |
| 5278 | 5A | 24934 | IWB24934 | Excalibur_c30148_589        | 52.0 |
| 5279 | 5A | 4800  | IWB4800  | BobWhite_rep_c49700_452     | 52.0 |
| 5280 | 5A | 12787 | IWB12787 | CAP11_c2503_103             | 52.0 |
| 5281 | 5A | 65499 | IWB65499 | TA002096-0945               | 53.8 |
| 5282 | 5A | 65663 | IWB65663 | TA003225-1427               | 53.8 |
| 5283 | 5A | 80908 | IWA7597  | wsnp_Ra_c13_24576           | 53.8 |
| 5284 | 5A | 80563 | IWA7129  | wsnp_Ku_c5071_9049540       | 53.8 |
| 5285 | 5A | 78211 | IWA3975  | wsnp_Ex_c4666_8349206       | 53.8 |
| 5286 | 5A | 9138  | IWB9138  | BS00063822_51               | 53.8 |
| 5287 | 5A | 53637 | IWB53637 | RAC875_c13_1458             | 53.8 |

|      |    |       |          |                             |      |
|------|----|-------|----------|-----------------------------|------|
| 5288 | 5A | 53644 | IWB53644 | RAC875_c13_2330             | 53.8 |
| 5289 | 5A | 79442 | IWA5539  | wsnp_Ex_rep_c68515_67349904 | 53.8 |
| 5290 | 5A | 72022 | IWB72022 | Tdurum_contig49844_958      | 53.8 |
| 5291 | 5A | 10513 | IWB10513 | BS00070903_51               | 53.8 |
| 5292 | 5A | 13508 | IWB13508 | CAP12_c667_143              | 53.8 |
| 5293 | 5A | 11474 | IWB11474 | BS00086963_51               | 53.8 |
| 5294 | 5A | 65662 | IWB65662 | TA003225-0566               | 53.8 |
| 5295 | 5A | 27439 | IWB27439 | Excalibur_c53930_53         | 53.8 |
| 5296 | 5A | 51106 | IWB51106 | Ra_c144_1023                | 53.8 |
| 5297 | 5A | 8862  | IWB8862  | BS00062427_51               | 53.8 |
| 5298 | 5A | 53643 | IWB53643 | RAC875_c13_2258             | 53.8 |
| 5299 | 5A | 9139  | IWB9139  | BS00063823_51               | 53.8 |
| 5300 | 5A | 53638 | IWB53638 | RAC875_c13_1589             | 53.8 |
| 5301 | 5A | 38790 | IWB38790 | Ku_c21587_754               | 53.8 |
| 5302 | 5A | 66579 | IWB66579 | Tdurum_contig10546_273      | 53.8 |
| 5303 | 5A | 45248 | IWB45248 | Kukri_c42466_392            | 53.8 |
| 5304 | 5A | 71584 | IWB71584 | Tdurum_contig45240_1309     | 53.8 |
| 5305 | 5A | 9056  | IWB9056  | BS00063425_51               | 53.8 |
| 5306 | 5A | 74436 | IWB74436 | tplb0031i04_452             | 53.8 |
| 5307 | 5A | 80564 | IWA7130  | wsnp_Ku_c5071_9050628       | 53.8 |
| 5308 | 5A | 34498 | IWB34498 | IAAV2080                    | 53.8 |
| 5309 | 5A | 7966  | IWB7966  | BS00034303_51               | 53.8 |
| 5310 | 5A | 7967  | IWB7967  | BS00034304_51               | 53.8 |
| 5311 | 5A | 61629 | IWB61629 | RAC875_rep_c106700_77       | 53.8 |
| 5312 | 5A | 33359 | IWB33359 | GENE-3370_463               | 53.8 |
| 5313 | 5A | 79441 | IWA5538  | wsnp_Ex_rep_c68515_67349716 | 54.6 |
| 5314 | 5A | 79587 | IWA5735  | wsnp_Ex_rep_c72507_70869798 | 54.6 |
| 5315 | 5A | 53640 | IWB53640 | RAC875_c13_1965             | 54.6 |
| 5316 | 5A | 80907 | IWA7596  | wsnp_Ra_c13_24540           | 54.6 |
| 5317 | 5A | 787   | IWB787   | BobWhite_c15454_63          | 54.6 |
| 5318 | 5A | 9723  | IWB9723  | BS00066127_51               | 54.6 |
| 5319 | 5A | 1040  | IWB1040  | BobWhite_c17440_130         | 55.8 |
| 5320 | 5A | 79684 | IWA5884  | wsnp_JD_c1796_2496653       | 56.4 |
| 5321 | 5A | 61122 | IWB61122 | RAC875_c95309_460           | 56.7 |
| 5322 | 5A | 33480 | IWB33480 | GENE-3583_319               | 56.7 |
| 5323 | 5A | 35587 | IWB35587 | IAAV9057                    | 56.7 |
| 5324 | 5A | 9838  | IWB9838  | BS00066569_51               | 56.9 |
| 5325 | 5A | 688   | IWB688   | BobWhite_c14705_487         | 57.2 |
| 5326 | 5A | 79434 | IWA5528  | wsnp_Ex_rep_c68441_67261679 | 57.2 |
| 5327 | 5A | 6002  | IWB6002  | BS00005311_51               | 57.2 |
| 5328 | 5A | 71919 | IWB71919 | Tdurum_contig48766_257      | 58.1 |
| 5329 | 5A | 12396 | IWB12396 | BS00109052_51               | 58.4 |
| 5330 | 5A | 21005 | IWB21005 | Ex_c6161_335                | 58.9 |
| 5331 | 5A | 79323 | IWA5380  | wsnp_Ex_rep_c67292_65834396 | 59.5 |
| 5332 | 5A | 10855 | IWB10855 | BS00076190_51               | 59.8 |
| 5333 | 5A | 77393 | IWA2926  | wsnp_Ex_c2474_4619730       | 60.0 |
| 5334 | 5A | 10795 | IWB10795 | BS00075308_51               | 60.0 |
| 5335 | 5A | 21834 | IWB21834 | Excalibur_c112658_300       | 60.0 |
| 5336 | 5A | 64901 | IWB64901 | RFL_Contig5137_917          | 60.0 |
| 5337 | 5A | 76793 | IWA2101  | wsnp_Ex_c16127_24561453     | 60.0 |
| 5338 | 5A | 81033 | IWA7773  | wsnp_Ra_c23878_33418076     | 62.0 |
| 5339 | 5A | 78594 | IWA4477  | wsnp_Ex_c6314_10993582      | 62.0 |
| 5340 | 5A | 36452 | IWB36452 | Jagger_c1611_158            | 62.0 |
| 5341 | 5A | 81204 | IWA8009  | wsnp_Ra_c5651_9978896       | 62.0 |

|      |    |       |          |                              |      |
|------|----|-------|----------|------------------------------|------|
| 5342 | 5A | 11111 | IWB11111 | BS00080093_51                | 62.0 |
| 5343 | 5A | 57809 | IWB57809 | RAC875_c42037_363            | 62.0 |
| 5344 | 5A | 73422 | IWB73422 | Tdurum_contig77524_228       | 62.0 |
| 5345 | 5A | 79915 | IWA6232  | wsnp_JD_c9510_10342018       | 62.0 |
| 5346 | 5A | 10055 | IWB10055 | BS00067456_51                | 62.0 |
| 5347 | 5A | 22565 | IWB22565 | Excalibur_c15134_889         | 62.0 |
| 5348 | 5A | 56276 | IWB56276 | RAC875_c29072_75             | 62.0 |
| 5349 | 5A | 69450 | IWB69450 | Tdurum_contig28179_189       | 62.0 |
| 5350 | 5A | 14779 | IWB14779 | CAP8_c4920_219               | 62.0 |
| 5351 | 5A | 33420 | IWB33420 | GENE-3493_612                | 62.0 |
| 5352 | 5A | 45690 | IWB45690 | Kukri_c46666_171             | 62.0 |
| 5353 | 5A | 71631 | IWB71631 | Tdurum_contig4567_312        | 62.0 |
| 5354 | 5A | 81203 | IWA8008  | wsnp_Ra_c5651_9978752        | 62.0 |
| 5355 | 5A | 73545 | IWB73545 | Tdurum_contig82048_224       | 62.0 |
| 5356 | 5A | 75927 | IWA850   | wsnp_CAP11_rep_c4151_1963100 | 62.0 |
| 5357 | 5A | 75399 | IWA104   | wsnp_BE442676A_Ta_2_1        | 62.0 |
| 5358 | 5A | 4680  | IWB4680  | BobWhite_c9931_915           | 62.0 |
| 5359 | 5A | 56142 | IWB56142 | RAC875_c27967_1477           | 62.0 |
| 5360 | 5A | 59706 | IWB59706 | RAC875_c62685_520            | 62.0 |
| 5361 | 5A | 28986 | IWB28986 | Excalibur_c8110_231          | 62.0 |
| 5362 | 5A | 218   | IWB218   | BobWhite_c11405_356          | 62.0 |
| 5363 | 5A | 79785 | IWA6036  | wsnp_JD_c3867_4934646        | 62.0 |
| 5364 | 5A | 78593 | IWA4476  | wsnp_Ex_c6314_10992814       | 62.0 |
| 5365 | 5A | 33227 | IWB33227 | GENE-3101_137                | 62.0 |
| 5366 | 5A | 3119  | IWB3119  | BobWhite_c40449_189          | 62.0 |
| 5367 | 5A | 71455 | IWB71455 | Tdurum_contig43874_1129      | 62.0 |
| 5368 | 5A | 5642  | IWB5642  | BobWhite_rep_c67156_244      | 62.0 |
| 5369 | 5A | 77049 | IWA2445  | wsnp_Ex_c19647_28632659      | 62.8 |
| 5370 | 5A | 53498 | IWB53498 | RAC875_c1219_1258            | 65.7 |
| 5371 | 5A | 42775 | IWB42775 | Kukri_c2326_659              | 65.7 |
| 5372 | 5A | 58797 | IWB58797 | RAC875_c52086_340            | 65.7 |
| 5373 | 5A | 78269 | IWA4049  | wsnp_Ex_c4921_8764088        | 65.7 |
| 5374 | 5A | 14582 | IWB14582 | CAP8_c2014_192               | 65.7 |
| 5375 | 5A | 42777 | IWB42777 | Kukri_c2326_995              | 65.7 |
| 5376 | 5A | 42774 | IWB42774 | Kukri_c2326_1037             | 65.7 |
| 5377 | 5A | 5443  | IWB5443  | BobWhite_rep_c64197_143      | 65.7 |
| 5378 | 5A | 69484 | IWB69484 | Tdurum_contig28282_184       | 65.7 |
| 5379 | 5A | 6959  | IWB6959  | BS00022191_51                | 65.7 |
| 5380 | 5A | 77986 | IWA3683  | wsnp_Ex_c39592_46849607      | 65.7 |
| 5381 | 5A | 11967 | IWB11967 | BS00096688_51                | 65.7 |
| 5382 | 5A | 11226 | IWB11226 | BS00082002_51                | 65.7 |
| 5383 | 5A | 20824 | IWB20824 | Ex_c4921_742                 | 66.0 |
| 5384 | 5A | 14825 | IWB14825 | CAP8_c5592_77                | 66.0 |
| 5385 | 5A | 2190  | IWB2190  | BobWhite_c28317_190          | 66.6 |
| 5386 | 5A | 34728 | IWB34728 | IAAV3514                     | 66.8 |
| 5387 | 5A | 41181 | IWB41181 | Kukri_c14275_674             | 66.8 |
| 5388 | 5A | 80105 | IWA6522  | wsnp_Ku_c14275_22535576      | 66.8 |
| 5389 | 5A | 80106 | IWA6523  | wsnp_Ku_c14275_22535693      | 66.8 |
| 5390 | 5A | 12306 | IWB12306 | BS00107192_51                | 66.8 |
| 5391 | 5A | 5278  | IWB5278  | BobWhite_rep_c61813_322      | 66.8 |
| 5392 | 5A | 468   | IWB468   | BobWhite_c13238_386          | 66.8 |
| 5393 | 5A | 12933 | IWB12933 | CAP11_c528_76                | 68.2 |
| 5394 | 5A | 49048 | IWB49048 | Kukri_rep_c104877_2166       | 68.5 |
| 5395 | 5A | 39499 | IWB39499 | Ku_c47168_563                | 70.9 |

|      |    |       |          |                         |      |
|------|----|-------|----------|-------------------------|------|
| 5396 | 5A | 31570 | IWB31570 | Excalibur_s114708_55    | 71.7 |
| 5397 | 5A | 14493 | IWB14493 | CAP8_c1066_309          | 71.7 |
| 5398 | 5A | 78720 | IWA4629  | wsnp_Ex_c7168_12311649  | 72.3 |
| 5399 | 5A | 4229  | IWB4229  | BobWhite_c6759_365      | 72.3 |
| 5400 | 5A | 76456 | IWA1686  | wsnp_Ex_c1279_2451699   | 72.5 |
| 5401 | 5A | 53912 | IWB53912 | RAC875_c1437_1644       | 72.5 |
| 5402 | 5A | 76455 | IWA1685  | wsnp_Ex_c1279_2451582   | 72.5 |
| 5403 | 5A | 61293 | IWB61293 | RAC875_c99519_227       | 72.5 |
| 5404 | 5A | 78948 | IWA4914  | wsnp_Ex_c94356_82888150 | 72.5 |
| 5405 | 5A | 73963 | IWB73963 | Tdurum_contig96830_155  | 72.5 |
| 5406 | 5A | 73348 | IWB73348 | Tdurum_contig76136_404  | 72.5 |
| 5407 | 5A | 71850 | IWB71850 | Tdurum_contig47852_422  | 72.5 |
| 5408 | 5A | 71451 | IWB71451 | Tdurum_contig43844_1266 | 72.5 |
| 5409 | 5A | 72632 | IWB72632 | Tdurum_contig59338_1902 | 72.5 |
| 5410 | 5A | 21444 | IWB21444 | Ex_c9327_1907           | 72.5 |
| 5411 | 5A | 21442 | IWB21442 | Ex_c9327_1198           | 72.5 |
| 5412 | 5A | 35206 | IWB35206 | IAAV6488                | 72.5 |
| 5413 | 5A | 80423 | IWA6949  | wsnp_Ku_c35386_44598937 | 72.8 |
| 5414 | 5A | 33345 | IWB33345 | GENE-3344_224           | 73.1 |
| 5415 | 5A | 35355 | IWB35355 | IAAV7514                | 73.1 |
| 5416 | 5A | 43972 | IWB43972 | Kukri_c31411_690        | 73.1 |
| 5417 | 5A | 11865 | IWB11865 | BS00094342_51           | 73.1 |
| 5418 | 5A | 22035 | IWB22035 | Excalibur_c1208_72      | 74.5 |
| 5419 | 5A | 75517 | IWA263   | wsnp_BE495277A_Ta_2_5   | 76.8 |
| 5420 | 5A | 75505 | IWA247   | wsnp_BE494426A_Ta_1_2   | 76.8 |
| 5421 | 5A | 41144 | IWB41144 | Kukri_c14056_497        | 76.8 |
| 5422 | 5A | 75516 | IWA262   | wsnp_BE495277A_Ta_2_1   | 76.8 |
| 5423 | 5A | 4568  | IWB4568  | BobWhite_c9057_118      | 76.8 |
| 5424 | 5A | 5459  | IWB5459  | BobWhite_rep_c64318_615 | 76.8 |
| 5425 | 5A | 56234 | IWB56234 | RAC875_c28819_320       | 76.8 |
| 5426 | 5A | 3848  | IWB3848  | BobWhite_c5457_1440     | 76.8 |
| 5427 | 5A | 4912  | IWB4912  | BobWhite_rep_c50888_306 | 76.8 |
| 5428 | 5A | 48920 | IWB48920 | Kukri_rep_c103857_458   | 76.8 |
| 5429 | 5A | 35949 | IWB35949 | IACX424                 | 76.8 |
| 5430 | 5A | 58598 | IWB58598 | RAC875_c49940_385       | 76.8 |
| 5431 | 5A | 75097 | IWB75097 | tplb0056b09_1000        | 76.8 |
| 5432 | 5A | 52993 | IWB52993 | RAC875_c10310_1486      | 77.4 |
| 5433 | 5A | 66106 | IWB66106 | TA012788-0448           | 77.4 |
| 5434 | 5A | 62312 | IWB62312 | RAC875_rep_c115230_87   | 77.4 |
| 5435 | 5A | 5565  | IWB5565  | BobWhite_rep_c65811_114 | 77.7 |
| 5436 | 5A | 50745 | IWB50745 | Ra_c10310_595           | 77.7 |
| 5437 | 5A | 233   | IWB233   | BobWhite_c11512_157     | 78.2 |
| 5438 | 5A | 52461 | IWB52461 | Ra_c6930_1753           | 79.1 |
| 5439 | 5A | 29626 | IWB29626 | Excalibur_c9846_1720    | 80.5 |
| 5440 | 5A | 9731  | IWB9731  | BS00066143_51           | 80.5 |
| 5441 | 5A | 52919 | IWB52919 | RAC875_c101391_521      | 80.5 |
| 5442 | 5A | 59682 | IWB59682 | RAC875_c62327_65        | 80.5 |
| 5443 | 5A | 80569 | IWA7135  | wsnp_Ku_c51039_56457361 | 80.5 |
| 5444 | 5A | 12854 | IWB12854 | CAP11_c3591_72          | 80.5 |
| 5445 | 5A | 1253  | IWB1253  | BobWhite_c19155_246     | 80.5 |
| 5446 | 5A | 73631 | IWB73631 | Tdurum_contig83412_270  | 81.3 |
| 5447 | 5A | 61032 | IWB61032 | RAC875_c91464_170       | 81.3 |
| 5448 | 5A | 6762  | IWB6762  | BS00021805_51           | 81.3 |
| 5449 | 5A | 75269 | IWB75269 | tplb0060m15_257         | 82.2 |

|      |    |       |          |                         |      |
|------|----|-------|----------|-------------------------|------|
| 5450 | 5A | 47184 | IWB47184 | Kukri_c6477_696         | 82.2 |
| 5451 | 5A | 34336 | IWB34336 | IAAV1179                | 82.2 |
| 5452 | 5A | 45474 | IWB45474 | Kukri_c44685_238        | 82.2 |
| 5453 | 5A | 72977 | IWB72977 | Tdurum_contig64337_158  | 82.4 |
| 5454 | 5A | 50648 | IWB50648 | Kukri_s112978_54        | 83.3 |
| 5455 | 5A | 41287 | IWB41287 | Kukri_c14889_1086       | 83.3 |
| 5456 | 5A | 33279 | IWB33279 | GENE-3189_377           | 83.3 |
| 5457 | 5A | 36671 | IWB36671 | Jagger_c6106_119        | 83.3 |
| 5458 | 5A | 47646 | IWB47646 | Kukri_c75754_239        | 83.3 |
| 5459 | 5A | 10250 | IWB10250 | BS00068178_51           | 83.3 |
| 5460 | 5A | 12027 | IWB12027 | BS00098207_51           | 83.3 |
| 5461 | 5A | 68661 | IWB68661 | Tdurum_contig17500_876  | 83.6 |
| 5462 | 5A | 33329 | IWB33329 | GENE-3318_556           | 83.6 |
| 5463 | 5A | 45155 | IWB45155 | Kukri_c41594_74         | 87.8 |
| 5464 | 5A | 42941 | IWB42941 | Kukri_c24211_1034       | 88.3 |
| 5465 | 5A | 76988 | IWA2364  | wsnp_Ex_c18941_27840933 | 88.3 |
| 5466 | 5A | 76989 | IWA2365  | wsnp_Ex_c18941_27841286 | 88.3 |
| 5467 | 5A | 7725  | IWB7725  | BS00029412_51           | 88.3 |
| 5468 | 5A | 27298 | IWB27298 | Excalibur_c52167_355    | 88.9 |
| 5469 | 5A | 3341  | IWB3341  | BobWhite_c43981_90      | 88.9 |
| 5470 | 5A | 80050 | IWA6456  | wsnp_Ku_c12211_19780409 | 88.9 |
| 5471 | 5A | 3340  | IWB3340  | BobWhite_c43981_59      | 88.9 |
| 5472 | 5A | 80956 | IWA7665  | wsnp_Ra_c17216_26044790 | 88.9 |
| 5473 | 5A | 6708  | IWB6708  | BS00021678_51           | 89.2 |
| 5474 | 5A | 12467 | IWB12467 | BS00110075_51           | 89.2 |
| 5475 | 5A | 6702  | IWB6702  | BS00021669_51           | 89.2 |
| 5476 | 5A | 10117 | IWB10117 | BS00067676_51           | 90.0 |
| 5477 | 5A | 34534 | IWB34534 | IAAV2328                | 90.3 |
| 5478 | 5A | 78229 | IWA3996  | wsnp_Ex_c47684_52820187 | 91.2 |
| 5479 | 5A | 75341 | IWA12    | wsnp_BE399939A_Ta_2_1   | 91.2 |
| 5480 | 5A | 4234  | IWB4234  | BobWhite_c6782_180      | 92.6 |
| 5481 | 5A | 10966 | IWB10966 | BS00077858_51           | 92.6 |
| 5482 | 5A | 10965 | IWB10965 | BS00077855_51           | 92.6 |
| 5483 | 5A | 6184  | IWB6184  | BS00010179_51           | 92.6 |
| 5484 | 5A | 55492 | IWB55492 | RAC875_c23340_2243      | 92.8 |
| 5485 | 5A | 35938 | IWB35938 | IACX3911                | 93.1 |
| 5486 | 5A | 73294 | IWB73294 | Tdurum_contig75699_1053 | 94.2 |
| 5487 | 5A | 40582 | IWB40582 | Kukri_c1137_411         | 94.2 |
| 5488 | 5A | 71641 | IWB71641 | Tdurum_contig4576_1153  | 94.2 |
| 5489 | 5A | 50059 | IWB50059 | Kukri_rep_c70839_205    | 94.2 |
| 5490 | 5A | 72998 | IWB72998 | Tdurum_contig64715_774  | 94.2 |
| 5491 | 5A | 71643 | IWB71643 | Tdurum_contig4576_603   | 94.2 |
| 5492 | 5A | 71983 | IWB71983 | Tdurum_contig49576_134  | 94.2 |
| 5493 | 5A | 73295 | IWB73295 | Tdurum_contig75699_984  | 94.2 |
| 5494 | 5A | 69159 | IWB69159 | Tdurum_contig25656_240  | 94.2 |
| 5495 | 5A | 71642 | IWB71642 | Tdurum_contig4576_1646  | 94.2 |
| 5496 | 5A | 71984 | IWB71984 | Tdurum_contig49576_75   | 94.2 |
| 5497 | 5A | 59852 | IWB59852 | RAC875_c64253_435       | 94.5 |
| 5498 | 5A | 59853 | IWB59853 | RAC875_c64253_666       | 94.5 |
| 5499 | 5A | 25846 | IWB25846 | Excalibur_c37642_800    | 95.6 |
| 5500 | 5A | 25845 | IWB25845 | Excalibur_c37642_493    | 95.6 |
| 5501 | 5A | 46889 | IWB46889 | Kukri_c60913_155        | 97.6 |
| 5502 | 5A | 47196 | IWB47196 | Kukri_c6492_375         | 97.6 |
| 5503 | 5A | 26844 | IWB26844 | Excalibur_c472_914      | 97.6 |

|      |    |       |          |                             |       |
|------|----|-------|----------|-----------------------------|-------|
| 5504 | 5A | 25393 | IWB25393 | Excalibur_c33923_592        | 97.6  |
| 5505 | 5A | 66355 | IWB66355 | Tdurum_contig10210_425      | 97.9  |
| 5506 | 5A | 55564 | IWB55564 | RAC875_c23775_406           | 97.9  |
| 5507 | 5A | 25715 | IWB25715 | Excalibur_c36447_516        | 97.9  |
| 5508 | 5A | 76720 | IWA2014  | wsnp_Ex_c15342_23592789     | 97.9  |
| 5509 | 5A | 79503 | IWA5623  | wsnp_Ex_rep_c69647_68598463 | 97.9  |
| 5510 | 5A | 52187 | IWB52187 | Ra_c50261_717               | 97.9  |
| 5511 | 5A | 35586 | IWB35586 | IAAV9053                    | 97.9  |
| 5512 | 5A | 10684 | IWB10684 | BS00073670_51               | 97.9  |
| 5513 | 5A | 43526 | IWB43526 | Kukri_c28080_887            | 98.2  |
| 5514 | 5A | 79504 | IWA5624  | wsnp_Ex_rep_c69647_68598487 | 98.8  |
| 5515 | 5A | 7746  | IWB7746  | BS00029871_51               | 99.1  |
| 5516 | 5A | 62170 | IWB62170 | RAC875_rep_c112751_303      | 99.1  |
| 5517 | 5A | 73200 | IWB73200 | Tdurum_contig71499_211      | 99.1  |
| 5518 | 5A | 55779 | IWB55779 | RAC875_c25339_200           | 99.1  |
| 5519 | 5A | 70567 | IWB70567 | Tdurum_contig36142_150      | 99.1  |
| 5520 | 5A | 46815 | IWB46815 | Kukri_c5967_586             | 99.1  |
| 5521 | 5A | 3131  | IWB3131  | BobWhite_c40633_308         | 99.1  |
| 5522 | 5A | 76297 | IWA1486  | wsnp_Ex_c1138_2185522       | 99.1  |
| 5523 | 5A | 10766 | IWB10766 | BS00074876_51               | 99.1  |
| 5524 | 5A | 38386 | IWB38386 | Ku_c13370_656               | 99.3  |
| 5525 | 5A | 73552 | IWB73552 | Tdurum_contig82190_124      | 99.3  |
| 5526 | 5A | 71521 | IWB71521 | Tdurum_contig44343_1039     | 99.6  |
| 5527 | 5A | 6049  | IWB6049  | BS00009369_51               | 100.4 |
| 5528 | 5A | 72992 | IWB72992 | Tdurum_contig64587_107      | 100.4 |
| 5529 | 5A | 73058 | IWB73058 | Tdurum_contig67291_367      | 100.4 |
| 5530 | 5A | 66717 | IWB66717 | Tdurum_contig10759_260      | 100.4 |
| 5531 | 5A | 10726 | IWB10726 | BS00074299_51               | 103.7 |
| 5532 | 5A | 73710 | IWB73710 | Tdurum_contig86202_175      | 103.7 |
| 5533 | 5A | 1737  | IWB1737  | BobWhite_c23736_153         | 103.7 |
| 5534 | 5A | 73709 | IWB73709 | Tdurum_contig86202_145      | 103.7 |
| 5535 | 5A | 72283 | IWB72283 | Tdurum_contig52695_388      | 103.7 |
| 5536 | 5A | 10862 | IWB10862 | BS00076246_51               | 103.7 |
| 5537 | 5A | 10727 | IWB10727 | BS00074301_51               | 103.7 |
| 5538 | 5A | 35164 | IWB35164 | IAAV619                     | 104.0 |
| 5539 | 5A | 33488 | IWB33488 | GENE-3601_145               | 104.0 |
| 5540 | 5A | 78793 | IWA4719  | wsnp_Ex_c7729_13177883      | 105.1 |
| 5541 | 5A | 36383 | IWB36383 | IACX9410                    | 105.1 |
| 5542 | 5A | 62360 | IWB62360 | RAC875_rep_c116420_103      | 105.1 |
| 5543 | 5A | 77737 | IWA3363  | wsnp_Ex_c31799_40545478     | 105.1 |
| 5544 | 5A | 62203 | IWB62203 | RAC875_rep_c113313_607      | 105.1 |
| 5545 | 5A | 40218 | IWB40218 | Kukri_c10033_724            | 105.1 |
| 5546 | 5A | 20403 | IWB20403 | Ex_c2840_1013               | 105.4 |
| 5547 | 5A | 79251 | IWA5287  | wsnp_Ex_rep_c66689_65010988 | 106.0 |
| 5548 | 5A | 61301 | IWB61301 | RAC875_c9984_1003           | 106.0 |
| 5549 | 5A | 74648 | IWB74648 | tplb0038h19_1394            | 106.0 |
| 5550 | 5A | 12023 | IWB12023 | BS00098062_51               | 106.0 |
| 5551 | 5A | 61908 | IWB61908 | RAC875_rep_c109716_67       | 106.2 |
| 5552 | 5A | 48364 | IWB48364 | Kukri_c9411_676             | 106.2 |
| 5553 | 5A | 35961 | IWB35961 | IACX448                     | 106.2 |
| 5554 | 5A | 23954 | IWB23954 | Excalibur_c23354_187        | 106.2 |
| 5555 | 5A | 7820  | IWB7820  | BS00031117_51               | 106.2 |
| 5556 | 5A | 6893  | IWB6893  | BS00022071_51               | 106.2 |
| 5557 | 5A | 77269 | IWA2743  | wsnp_Ex_c22727_31934296     | 106.2 |

|      |    |       |          |                              |       |
|------|----|-------|----------|------------------------------|-------|
| 5558 | 5A | 75334 | IWA1     | wsnp_AJ612027A_Ta_2_1        | 106.2 |
| 5559 | 5A | 78406 | IWA4221  | wsnp_Ex_c54193_57155632      | 106.2 |
| 5560 | 5A | 78405 | IWA4220  | wsnp_Ex_c54193_57155537      | 106.2 |
| 5561 | 5A | 78540 | IWA4398  | wsnp_Ex_c5998_10513766       | 106.2 |
| 5562 | 5A | 10843 | IWB10843 | BS00075959_51                | 106.2 |
| 5563 | 5A | 34703 | IWB34703 | IAAV3365                     | 106.2 |
| 5564 | 5A | 23955 | IWB23955 | Excalibur_c23354_306         | 106.2 |
| 5565 | 5A | 40810 | IWB40810 | Kukri_c12384_430             | 106.5 |
| 5566 | 5A | 47327 | IWB47327 | Kukri_c6669_145              | 106.5 |
| 5567 | 5A | 44169 | IWB44169 | Kukri_c33022_198             | 106.5 |
| 5568 | 5A | 76913 | IWA2256  | wsnp_Ex_c17763_26513562      | 108.2 |
| 5569 | 5A | 35506 | IWB35506 | IAAV8629                     | 108.2 |
| 5570 | 5A | 12839 | IWB12839 | CAP11_c3209_76               | 108.8 |
| 5571 | 5A | 76888 | IWA2223  | wsnp_Ex_c17476_26190830      | 108.8 |
| 5572 | 5A | 63075 | IWB63075 | RAC875_rep_c76193_513        | 108.8 |
| 5573 | 5A | 66780 | IWB66780 | Tdurum_contig10843_745       | 109.6 |
| 5574 | 5A | 64235 | IWB64235 | RFL_Contig316_572            | 109.6 |
| 5575 | 5A | 72051 | IWB72051 | Tdurum_contig50175_875       | 109.6 |
| 5576 | 5A | 78872 | IWA4813  | wsnp_Ex_c8543_14357051       | 109.6 |
| 5577 | 5A | 8767  | IWB8767  | BS00059098_51                | 109.6 |
| 5578 | 5A | 26265 | IWB26265 | Excalibur_c41710_417         | 109.6 |
| 5579 | 5A | 37063 | IWB37063 | JD_c15758_288                | 109.6 |
| 5580 | 5A | 75918 | IWA835   | wsnp_CAP11_rep_c4073_1924782 | 109.6 |
| 5581 | 5A | 74800 | IWB74800 | tplb0044j06_689              | 109.9 |
| 5582 | 5A | 12135 | IWB12135 | BS00100510_51                | 109.9 |
| 5583 | 5A | 12366 | IWB12366 | BS00108474_51                | 109.9 |
| 5584 | 5A | 78536 | IWA4394  | wsnp_Ex_c5978_10478584       | 109.9 |
| 5585 | 5A | 81135 | IWA7911  | wsnp_Ra_c3966_7286546        | 109.9 |
| 5586 | 5A | 1041  | IWB1041  | BobWhite_c17445_83           | 111.3 |
| 5587 | 5A | 75736 | IWA576   | wsnp_BG606780A_Td_2_1        | 114.3 |
| 5588 | 5A | 12711 | IWB12711 | CAP11_c1685_149              | 115.1 |
| 5589 | 5A | 47006 | IWB47006 | Kukri_c6266_260              | 115.1 |
| 5590 | 5A | 78004 | IWA3705  | wsnp_Ex_c40019_47166980      | 115.7 |
| 5591 | 5A | 5457  | IWB5457  | BobWhite_rep_c64315_180      | 116.0 |
| 5592 | 5A | 29406 | IWB29406 | Excalibur_c92705_94          | 116.0 |
| 5593 | 5A | 32889 | IWB32889 | GENE-2344_73                 | 116.0 |
| 5594 | 5A | 912   | IWB912   | BobWhite_c16397_524          | 116.9 |
| 5595 | 5A | 35862 | IWB35862 | IACX2539                     | 116.9 |
| 5596 | 5A | 15392 | IWB15392 | D_contig06709_822            | 117.1 |
| 5597 | 5A | 71377 | IWB71377 | Tdurum_contig42905_282       | 118.0 |
| 5598 | 5A | 59523 | IWB59523 | RAC875_c60453_122            | 118.6 |
| 5599 | 5A | 75347 | IWA21    | wsnp_BE403211A_Td_2_1        | 118.6 |
| 5600 | 5A | 66044 | IWB66044 | TA006037-0261                | 118.6 |
| 5601 | 5A | 53729 | IWB53729 | RAC875_c13490_1344           | 118.6 |
| 5602 | 5A | 76124 | IWA1258  | wsnp_CD454152A_Ta_2_1        | 120.0 |
| 5603 | 5A | 12226 | IWB12226 | BS00104432_51                | 124.0 |
| 5604 | 5A | 12442 | IWB12442 | BS00109908_51                | 124.3 |
| 5605 | 5A | 43714 | IWB43714 | Kukri_c29475_380             | 124.5 |
| 5606 | 5A | 43581 | IWB43581 | Kukri_c28555_114             | 124.8 |
| 5607 | 5A | 76804 | IWA2113  | wsnp_Ex_c16295_24772663      | 133.6 |
| 5608 | 5A | 77346 | IWA2856  | wsnp_Ex_c23968_33209660      | 133.6 |
| 5609 | 5A | 11420 | IWB11420 | BS00085711_51                | 133.6 |
| 5610 | 5A | 79792 | IWA6049  | wsnp_JD_c43389_30288993      | 133.6 |
| 5611 | 5A | 78417 | IWA4239  | wsnp_Ex_c54655_57455562      | 133.6 |



|      |    |       |          |                              |       |
|------|----|-------|----------|------------------------------|-------|
| 5612 | 5A | 77348 | IWA2858  | wsnp_Ex_c23968_33210208      | 133.6 |
| 5613 | 5A | 77349 | IWA2859  | wsnp_Ex_c23968_33210344      | 133.6 |
| 5614 | 5A | 65730 | IWB65730 | TA003720-0955                | 133.6 |
| 5615 | 5A | 77347 | IWA2857  | wsnp_Ex_c23968_33209733      | 133.6 |
| 5616 | 5A | 80467 | IWA7009  | wsnp_Ku_c3953_7233359        | 133.6 |
| 5617 | 5A | 75911 | IWA821   | wsnp_CAP11_c923_558715       | 133.6 |
| 5618 | 5A | 76805 | IWA2114  | wsnp_Ex_c16295_24772702      | 133.6 |
| 5619 | 5A | 59148 | IWB59148 | RAC875_c55872_149            | 133.6 |
| 5620 | 5A | 34731 | IWB34731 | IAAV3527                     | 133.9 |
| 5621 | 5A | 15035 | IWB15035 | CAP8_rep_c4852_130           | 134.4 |
| 5622 | 5A | 15981 | IWB15981 | D_contig19808_203            | 135.0 |
| 5623 | 5A | 65415 | IWB65415 | TA001523-1009                | 135.3 |
| 5624 | 5A | 61152 | IWB61152 | RAC875_c9617_395             | 135.5 |
| 5625 | 5A | 41168 | IWB41168 | Kukri_c14187_243             | 135.5 |
| 5626 | 5A | 61151 | IWB61151 | RAC875_c9617_373             | 135.5 |
| 5627 | 5A | 77703 | IWA3323  | wsnp_Ex_c31154_39982416      | 136.4 |
| 5628 | 5A | 58284 | IWB58284 | RAC875_c46811_128            | 136.4 |
| 5629 | 5A | 79138 | IWA5154  | wsnp_Ex_rep_c107017_90850230 | 136.4 |
| 5630 | 5A | 33038 | IWB33038 | GENE-2725_217                | 136.4 |
| 5631 | 5A | 66080 | IWB66080 | TA006296-0731                | 136.4 |
| 5632 | 5A | 7052  | IWB7052  | BS00022378_51                | 136.4 |
| 5633 | 5A | 11676 | IWB11676 | BS00090847_51                | 136.4 |
| 5634 | 5A | 8349  | IWB8349  | BS00043676_51                | 136.4 |
| 5635 | 5A | 27941 | IWB27941 | Excalibur_c60150_107         | 136.4 |
| 5636 | 5A | 5821  | IWB5821  | BS00003088_51                | 136.4 |
| 5637 | 5A | 2075  | IWB2075  | BobWhite_c27193_217          | 136.4 |
| 5638 | 5A | 48095 | IWB48095 | Kukri_c86812_193             | 136.4 |
| 5639 | 5A | 10909 | IWB10909 | BS00076948_51                | 136.4 |
| 5640 | 5A | 3232  | IWB3232  | BobWhite_c42349_99           | 136.4 |
| 5641 | 5A | 54225 | IWB54225 | RAC875_c16137_633            | 136.9 |
| 5642 | 5A | 59300 | IWB59300 | RAC875_c57603_144            | 137.2 |
| 5643 | 5A | 65128 | IWB65128 | RFL_Contig5787_2311          | 137.2 |
| 5644 | 5A | 11590 | IWB11590 | BS00089076_51                | 137.7 |
| 5645 | 5A | 69884 | IWB69884 | Tdurum_contig29770_177       | 137.7 |
| 5646 | 5A | 80888 | IWA7568  | wsnp_Ra_c11532_18688426      | 137.7 |
| 5647 | 5A | 990   | IWB990   | BobWhite_c17045_186          | 137.7 |
| 5648 | 5A | 11245 | IWB11245 | BS00082219_51                | 138.0 |
| 5649 | 5A | 29171 | IWB29171 | Excalibur_c8647_252          | 138.3 |
| 5650 | 5A | 2919  | IWB2919  | BobWhite_c37652_272          | 138.3 |
| 5651 | 5A | 9130  | IWB9130  | BS00063793_51                | 140.0 |
| 5652 | 5A | 80586 | IWA7162  | wsnp_Ku_c5445_9668131        | 140.0 |
| 5653 | 5A | 77328 | IWA2828  | wsnp_Ex_c23689_32927141      | 140.0 |
| 5654 | 5A | 76442 | IWA1670  | wsnp_Ex_c12684_20157261      | 140.0 |
| 5655 | 5A | 54928 | IWB54928 | RAC875_c19999_341            | 140.3 |
| 5656 | 5A | 5368  | IWB5368  | BobWhite_rep_c63332_67       | 140.6 |
| 5657 | 5A | 7282  | IWB7282  | BS00022838_51                | 140.6 |
| 5658 | 5A | 45943 | IWB45943 | Kukri_c49033_52              | 140.6 |
| 5659 | 5A | 14661 | IWB14661 | CAP8_c3064_95                | 140.6 |
| 5660 | 5A | 6827  | IWB6827  | BS00021968_51                | 140.6 |
| 5661 | 5A | 69108 | IWB69108 | Tdurum_contig25487_857       | 141.1 |
| 5662 | 5A | 10802 | IWB10802 | BS00075379_51                | 141.7 |
| 5663 | 5A | 77335 | IWA2839  | wsnp_Ex_c23795_33033959      | 0.0   |
| 5664 | 5A | 64432 | IWB64432 | RFL_Contig3629_1465          | 142.0 |
| 5665 | 5A | 4836  | IWB4836  | BobWhite_rep_c50013_65       | 142.2 |

|      |    |       |          |                              |       |
|------|----|-------|----------|------------------------------|-------|
| 5666 | 5A | 23336 | IWB23336 | Excalibur_c1954_930          | 142.2 |
| 5667 | 5A | 71385 | IWB71385 | Tdurum_contig42962_2138      | 142.2 |
| 5668 | 5A | 5178  | IWB5178  | BobWhite_rep_c57286_122      | 142.8 |
| 5669 | 5A | 7409  | IWB7409  | BS00023070_51                | 143.1 |
| 5670 | 5A | 13571 | IWB13571 | CAP12_c956_61                | 143.9 |
| 5671 | 5A | 34800 | IWB34800 | IAAV3916                     | 143.9 |
| 5672 | 5A | 43734 | IWB43734 | Kukri_c29521_123             | 143.9 |
| 5673 | 5A | 72378 | IWB72378 | Tdurum_contig54689_646       | 143.9 |
| 5674 | 5A | 75796 | IWA649   | wsnp_CAP11_c1116_654975      | 143.9 |
| 5675 | 5A | 75795 | IWA648   | wsnp_CAP11_c1116_654940      | 143.9 |
| 5676 | 5A | 14333 | IWB14333 | CAP7_c9530_138               | 144.2 |
| 5677 | 5A | 8070  | IWB8070  | BS00036851_51                | 144.2 |
| 5678 | 5A | 77714 | IWA3335  | wsnp_Ex_c3136_5798236        | 144.2 |
| 5679 | 5A | 79015 | IWA5003  | wsnp_Ex_rep_c101323_86702546 | 145.0 |
| 5680 | 5A | 79014 | IWA5002  | wsnp_Ex_rep_c101323_86702413 | 145.6 |
| 5681 | 5A | 14077 | IWB14077 | CAP7_c4064_162               | 150.2 |
| 5682 | 5A | 7449  | IWB7449  | BS00023152_51                | 150.7 |
| 5683 | 5A | 9620  | IWB9620  | BS00065714_51                | 151.0 |
| 5684 | 5A | 9855  | IWB9855  | BS00066652_51                | 151.0 |
| 5685 | 5A | 30349 | IWB30349 | Excalibur_rep_c108520_84     | 154.7 |
| 5686 | 5A | 43227 | IWB43227 | Kukri_c25994_609             | 154.7 |
| 5687 | 5A | 73634 | IWB73634 | Tdurum_contig8348_831        | 155.3 |
| 5688 | 5A | 69406 | IWB69406 | Tdurum_contig28001_110       | 155.9 |
| 5689 | 5B | 28541 | IWB28541 | Excalibur_c6967_1852         | 0.0   |
| 5690 | 5B | 7564  | IWB7564  | BS00024992_51                | 0.0   |
| 5691 | 5B | 64852 | IWB64852 | RFL_Contig4979_965           | 0.0   |
| 5692 | 5B | 47271 | IWB47271 | Kukri_c65921_274             | 0.0   |
| 5693 | 5B | 28540 | IWB28540 | Excalibur_c6967_1233         | 0.0   |
| 5694 | 5B | 5398  | IWB5398  | BobWhite_rep_c63710_181      | 0.0   |
| 5695 | 5B | 6180  | IWB6180  | BS00010153_51                | 0.0   |
| 5696 | 5B | 28542 | IWB28542 | Excalibur_c6967_553          | 0.0   |
| 5697 | 5B | 1736  | IWB1736  | BobWhite_c23714_130          | 0.0   |
| 5698 | 5B | 50052 | IWB50052 | Kukri_rep_c70770_1937        | 0.0   |
| 5699 | 5B | 7565  | IWB7565  | BS00024993_51                | 0.0   |
| 5700 | 5B | 25183 | IWB25183 | Excalibur_c32189_998         | 0.0   |
| 5701 | 5B | 60572 | IWB60572 | RAC875_c79649_582            | 3.6   |
| 5702 | 5B | 68149 | IWB68149 | Tdurum_contig14130_245       | 3.6   |
| 5703 | 5B | 78852 | IWA4790  | wsnp_Ex_c831_1625061         | 3.6   |
| 5704 | 5B | 7137  | IWB7137  | BS00022525_51                | 3.6   |
| 5705 | 5B | 11318 | IWB11318 | BS00083715_51                | 3.6   |
| 5706 | 5B | 10074 | IWB10074 | BS00067550_51                | 3.6   |
| 5707 | 5B | 68150 | IWB68150 | Tdurum_contig14130_315       | 3.6   |
| 5708 | 5B | 71482 | IWB71482 | Tdurum_contig44048_276       | 7.9   |
| 5709 | 5B | 58325 | IWB58325 | RAC875_c47212_309            | 7.9   |
| 5710 | 5B | 73718 | IWB73718 | Tdurum_contig8695_379        | 7.9   |
| 5711 | 5B | 72326 | IWB72326 | Tdurum_contig53796_360       | 7.9   |
| 5712 | 5B | 37583 | IWB37583 | JD_c51907_59                 | 7.9   |
| 5713 | 5B | 11140 | IWB11140 | BS00080746_51                | 7.9   |
| 5714 | 5B | 79689 | IWA5891  | wsnp_JD_c1845_2564931        | 7.9   |
| 5715 | 5B | 35324 | IWB35324 | IAAV731                      | 7.9   |
| 5716 | 5B | 20597 | IWB20597 | Ex_c37410_1026               | 7.9   |
| 5717 | 5B | 56396 | IWB56396 | RAC875_c29907_293            | 8.4   |
| 5718 | 5B | 56395 | IWB56395 | RAC875_c29907_115            | 8.4   |
| 5719 | 5B | 11067 | IWB11067 | BS00079185_51                | 8.4   |

|      |    |       |          |                              |      |
|------|----|-------|----------|------------------------------|------|
| 5720 | 5B | 7035  | IWB7035  | BS00022336_51                | 8.4  |
| 5721 | 5B | 24915 | IWB24915 | Excalibur_c29975_333         | 8.4  |
| 5722 | 5B | 33287 | IWB33287 | GENE-3207_134                | 9.8  |
| 5723 | 5B | 42850 | IWB42850 | Kukri_c23694_370             | 9.8  |
| 5724 | 5B | 73786 | IWB73786 | Tdurum_contig92396_380       | 9.8  |
| 5725 | 5B | 9577  | IWB9577  | BS00065543_51                | 9.8  |
| 5726 | 5B | 21933 | IWB21933 | Excalibur_c11605_156         | 10.1 |
| 5727 | 5B | 69077 | IWB69077 | Tdurum_contig25432_1020      | 11.3 |
| 5728 | 5B | 10125 | IWB10125 | BS00067701_51                | 11.3 |
| 5729 | 5B | 69078 | IWB69078 | Tdurum_contig25432_1218      | 11.3 |
| 5730 | 5B | 69079 | IWB69079 | Tdurum_contig25432_1377      | 11.3 |
| 5731 | 5B | 75624 | IWA420   | wsnp_BF201102B_Ta_2_1        | 12.1 |
| 5732 | 5B | 66121 | IWB66121 | TA014612-0744                | 12.1 |
| 5733 | 5B | 80631 | IWA7223  | wsnp_Ku_c64203_64579087      | 12.1 |
| 5734 | 5B | 66134 | IWB66134 | TA015732-1144                | 12.1 |
| 5735 | 5B | 49399 | IWB49399 | Kukri_rep_c109397_59         | 12.1 |
| 5736 | 5B | 73191 | IWB73191 | Tdurum_contig71099_245       | 12.1 |
| 5737 | 5B | 48848 | IWB48848 | Kukri_rep_c103150_398        | 14.7 |
| 5738 | 5B | 80602 | IWA7181  | wsnp_Ku_c568_1187615         | 14.7 |
| 5739 | 5B | 14983 | IWB14983 | CAP8_c909_312                | 14.7 |
| 5740 | 5B | 14332 | IWB14332 | CAP7_c9506_174               | 15.3 |
| 5741 | 5B | 76070 | IWA1144  | wsnp_CAP8_c1210_739429       | 15.3 |
| 5742 | 5B | 27819 | IWB27819 | Excalibur_c58520_78          | 15.3 |
| 5743 | 5B | 14163 | IWB14163 | CAP7_c5481_96                | 15.3 |
| 5744 | 5B | 77609 | IWA3211  | wsnp_Ex_c29051_38120784      | 15.6 |
| 5745 | 5B | 77477 | IWA3033  | wsnp_Ex_c26252_35497729      | 15.6 |
| 5746 | 5B | 47615 | IWB47615 | Kukri_c74960_427             | 15.6 |
| 5747 | 5B | 7932  | IWB7932  | BS00033612_51                | 15.6 |
| 5748 | 5B | 80420 | IWA6946  | wsnp_Ku_c35090_44349446      | 15.6 |
| 5749 | 5B | 62348 | IWB62348 | RAC875_rep_c116173_605       | 16.7 |
| 5750 | 5B | 26650 | IWB26650 | Excalibur_c45323_708         | 16.7 |
| 5751 | 5B | 10350 | IWB10350 | BS00068592_51                | 17.2 |
| 5752 | 5B | 22465 | IWB22465 | Excalibur_c14594_182         | 17.2 |
| 5753 | 5B | 54368 | IWB54368 | RAC875_c16827_292            | 18.4 |
| 5754 | 5B | 51376 | IWB51376 | Ra_c19837_1031               | 19.2 |
| 5755 | 5B | 20310 | IWB20310 | Ex_c2571_842                 | 19.2 |
| 5756 | 5B | 56578 | IWB56578 | RAC875_c31197_62             | 19.2 |
| 5757 | 5B | 77444 | IWA2992  | wsnp_Ex_c2571_4784380        | 19.2 |
| 5758 | 5B | 58506 | IWB58506 | RAC875_c49044_335            | 19.2 |
| 5759 | 5B | 58508 | IWB58508 | RAC875_c49044_445            | 19.2 |
| 5760 | 5B | 79097 | IWA5108  | wsnp_Ex_rep_c104041_88855253 | 19.2 |
| 5761 | 5B | 78505 | IWA4353  | wsnp_Ex_c58012_59490259      | 19.2 |
| 5762 | 5B | 20311 | IWB20311 | Ex_c2571_987                 | 19.2 |
| 5763 | 5B | 35827 | IWB35827 | IACX20330                    | 19.2 |
| 5764 | 5B | 32093 | IWB32093 | GENE-0782_747                | 19.2 |
| 5765 | 5B | 78447 | IWA4282  | wsnp_Ex_c5598_9855436        | 19.2 |
| 5766 | 5B | 80684 | IWA7300  | wsnp_Ku_c7872_13484038       | 19.2 |
| 5767 | 5B | 10728 | IWB10728 | BS00074315_51                | 19.5 |
| 5768 | 5B | 9675  | IWB9675  | BS00065930_51                | 19.5 |
| 5769 | 5B | 76684 | IWA1965  | wsnp_Ex_c1498_2868339        | 19.5 |
| 5770 | 5B | 25964 | IWB25964 | Excalibur_c38701_537         | 19.5 |
| 5771 | 5B | 34566 | IWB34566 | IAAV2507                     | 19.5 |
| 5772 | 5B | 46117 | IWB46117 | Kukri_c51_98                 | 19.5 |
| 5773 | 5B | 78524 | IWA4378  | wsnp_Ex_c5915_10378807       | 19.5 |

|      |    |       |          |                              |      |
|------|----|-------|----------|------------------------------|------|
| 5774 | 5B | 49199 | IWB49199 | Kukri_rep_c106665_549        | 19.5 |
| 5775 | 5B | 23028 | IWB23028 | Excalibur_c17843_812         | 19.5 |
| 5776 | 5B | 49174 | IWB49174 | Kukri_rep_c106411_137        | 19.5 |
| 5777 | 5B | 72886 | IWB72886 | Tdurum_contig62320_141       | 19.5 |
| 5778 | 5B | 79076 | IWA5079  | wsnp_Ex_rep_c103024_88075650 | 19.5 |
| 5779 | 5B | 79407 | IWA5494  | wsnp_Ex_rep_c68091_66846454  | 19.8 |
| 5780 | 5B | 34854 | IWB34854 | IAAV4252                     | 19.8 |
| 5781 | 5B | 76082 | IWA1176  | wsnp_CAP8_c2693_1401039      | 19.8 |
| 5782 | 5B | 27562 | IWB27562 | Excalibur_c5540_1197         | 19.8 |
| 5783 | 5B | 816   | IWB816   | BobWhite_c15585_87           | 19.8 |
| 5784 | 5B | 80104 | IWA6521  | wsnp_Ku_c14252_22506286      | 19.8 |
| 5785 | 5B | 69536 | IWB69536 | Tdurum_contig28482_427       | 19.8 |
| 5786 | 5B | 8592  | IWB8592  | BS00050709_51                | 19.8 |
| 5787 | 5B | 39446 | IWB39446 | Ku_c439_1308                 | 19.8 |
| 5788 | 5B | 71752 | IWB71752 | Tdurum_contig4708_1648       | 19.8 |
| 5789 | 5B | 80318 | IWA6816  | wsnp_Ku_c27243_37190781      | 19.8 |
| 5790 | 5B | 76538 | IWA1779  | wsnp_Ex_c13468_21202450      | 20.1 |
| 5791 | 5B | 33374 | IWB33374 | GENE-3385_255                | 20.1 |
| 5792 | 5B | 3193  | IWB3193  | BobWhite_c41725_430          | 20.1 |
| 5793 | 5B | 22696 | IWB22696 | Excalibur_c15838_305         | 20.1 |
| 5794 | 5B | 80389 | IWA6909  | wsnp_Ku_c32477_42086760      | 20.1 |
| 5795 | 5B | 36690 | IWB36690 | Jagger_c6508_51              | 20.1 |
| 5796 | 5B | 80626 | IWA7217  | wsnp_Ku_c61976_63270478      | 20.1 |
| 5797 | 5B | 34841 | IWB34841 | IAAV4162                     | 20.1 |
| 5798 | 5B | 80390 | IWA6910  | wsnp_Ku_c32477_42087329      | 20.1 |
| 5799 | 5B | 66052 | IWB66052 | TA006084-0922                | 20.1 |
| 5800 | 5B | 81189 | IWA7988  | wsnp_Ra_c5210_9289264        | 20.1 |
| 5801 | 5B | 59100 | IWB59100 | RAC875_c5518_1401            | 20.1 |
| 5802 | 5B | 34515 | IWB34515 | IAAV2194                     | 20.1 |
| 5803 | 5B | 50091 | IWB50091 | Kukri_rep_c71114_838         | 20.1 |
| 5804 | 5B | 63922 | IWB63922 | RFL_Contig2368_1958          | 20.1 |
| 5805 | 5B | 13805 | IWB13805 | CAP7_c1403_70                | 20.1 |
| 5806 | 5B | 79113 | IWA5126  | wsnp_Ex_rep_c104986_89538820 | 20.1 |
| 5807 | 5B | 12207 | IWB12207 | BS00103625_51                | 20.1 |
| 5808 | 5B | 28646 | IWB28646 | Excalibur_c7286_975          | 20.1 |
| 5809 | 5B | 69058 | IWB69058 | Tdurum_contig25393_218       | 20.1 |
| 5810 | 5B | 69307 | IWB69307 | Tdurum_contig27441_373       | 20.1 |
| 5811 | 5B | 9938  | IWB9938  | BS00067028_51                | 20.1 |
| 5812 | 5B | 5119  | IWB5119  | BobWhite_rep_c55336_265      | 20.1 |
| 5813 | 5B | 15500 | IWB15500 | D_contig09110_430            | 20.7 |
| 5814 | 5B | 35306 | IWB35306 | IAAV7187                     | 22.5 |
| 5815 | 5B | 65254 | IWB65254 | RFL_Contig707_2297           | 22.5 |
| 5816 | 5B | 4337  | IWB4337  | BobWhite_c7406_394           | 22.5 |
| 5817 | 5B | 81573 | IWA8604  | wsnp_RFL_Contig4574_5416228  | 22.5 |
| 5818 | 5B | 56366 | IWB56366 | RAC875_c29665_205            | 22.5 |
| 5819 | 5B | 76076 | IWA1155  | wsnp_CAP8_c1594_914839       | 22.5 |
| 5820 | 5B | 3400  | IWB3400  | BobWhite_c44797_294          | 22.5 |
| 5821 | 5B | 58992 | IWB58992 | RAC875_c53903_318            | 22.5 |
| 5822 | 5B | 42305 | IWB42305 | Kukri_c20396_3072            | 22.5 |
| 5823 | 5B | 78826 | IWA4757  | wsnp_Ex_c7988_13555166       | 22.5 |
| 5824 | 5B | 37830 | IWB37830 | JD_c8050_978                 | 22.5 |
| 5825 | 5B | 78889 | IWA4836  | wsnp_Ex_c8676_14535174       | 22.5 |
| 5826 | 5B | 49609 | IWB49609 | Kukri_rep_c113387_369        | 22.5 |
| 5827 | 5B | 61863 | IWB61863 | RAC875_rep_c109210_88        | 22.5 |

|      |    |       |          |                             |      |
|------|----|-------|----------|-----------------------------|------|
| 5828 | 5B | 56814 | IWB56814 | RAC875_c33156_101           | 22.5 |
| 5829 | 5B | 42078 | IWB42078 | Kukri_c19116_170            | 22.5 |
| 5830 | 5B | 65840 | IWB65840 | TA004455-0314               | 22.5 |
| 5831 | 5B | 58047 | IWB58047 | RAC875_c44540_51            | 22.5 |
| 5832 | 5B | 52106 | IWB52106 | Ra_c44540_304               | 22.5 |
| 5833 | 5B | 66116 | IWB66116 | TA013656-0196               | 22.5 |
| 5834 | 5B | 6012  | IWB6012  | BS00007437_51               | 22.5 |
| 5835 | 5B | 33591 | IWB33591 | GENE-3763_35                | 22.5 |
| 5836 | 5B | 77494 | IWA3056  | wsnp_Ex_c26616_35855805     | 22.5 |
| 5837 | 5B | 76914 | IWA2257  | wsnp_Ex_c17768_26519434     | 22.5 |
| 5838 | 5B | 48707 | IWB48707 | Kukri_rep_c101981_260       | 22.5 |
| 5839 | 5B | 33424 | IWB33424 | GENE-3499_134               | 22.5 |
| 5840 | 5B | 35163 | IWB35163 | IAAV6189                    | 22.5 |
| 5841 | 5B | 29025 | IWB29025 | Excalibur_c8224_1447        | 22.5 |
| 5842 | 5B | 11753 | IWB11753 | BS00092354_51               | 22.5 |
| 5843 | 5B | 31404 | IWB31404 | Excalibur_rep_c91489_103    | 22.5 |
| 5844 | 5B | 34529 | IWB34529 | IAAV2293                    | 22.5 |
| 5845 | 5B | 79512 | IWA5634  | wsnp_Ex_rep_c69760_68719014 | 22.5 |
| 5846 | 5B | 44326 | IWB44326 | Kukri_c34434_1037           | 22.5 |
| 5847 | 5B | 37799 | IWB37799 | JD_c7452_825                | 22.5 |
| 5848 | 5B | 81442 | IWA8378  | wsnp_RFL_Contig2731_2449789 | 22.5 |
| 5849 | 5B | 30637 | IWB30637 | Excalibur_rep_c113602_93    | 22.5 |
| 5850 | 5B | 45426 | IWB45426 | Kukri_c44284_80             | 22.5 |
| 5851 | 5B | 52230 | IWB52230 | Ra_c53208_433               | 22.5 |
| 5852 | 5B | 9850  | IWB9850  | BS00066628_51               | 22.5 |
| 5853 | 5B | 12549 | IWB12549 | BS00110489_51               | 22.8 |
| 5854 | 5B | 21107 | IWB21107 | Ex_c67244_1229              | 22.8 |
| 5855 | 5B | 79369 | IWA5440  | wsnp_Ex_rep_c67690_66354931 | 22.8 |
| 5856 | 5B | 13269 | IWB13269 | CAP12_c2009_335             | 22.8 |
| 5857 | 5B | 36491 | IWB36491 | Jagger_c249_279             | 22.8 |
| 5858 | 5B | 36643 | IWB36643 | Jagger_c5539_105            | 22.8 |
| 5859 | 5B | 78245 | IWA4015  | wsnp_Ex_c48257_53217539     | 22.8 |
| 5860 | 5B | 81553 | IWA8569  | wsnp_RFL_Contig4207_4836784 | 22.8 |
| 5861 | 5B | 79368 | IWA5439  | wsnp_Ex_rep_c67690_66354791 | 22.8 |
| 5862 | 5B | 68299 | IWB68299 | Tdurum_contig14784_676      | 22.8 |
| 5863 | 5B | 47295 | IWB47295 | Kukri_c6633_674             | 22.8 |
| 5864 | 5B | 35388 | IWB35388 | IAAV7800                    | 22.8 |
| 5865 | 5B | 10925 | IWB10925 | BS00077423_51               | 22.8 |
| 5866 | 5B | 71274 | IWB71274 | Tdurum_contig42527_298      | 22.8 |
| 5867 | 5B | 10657 | IWB10657 | BS00073261_51               | 23.4 |
| 5868 | 5B | 41816 | IWB41816 | Kukri_c17783_58             | 23.4 |
| 5869 | 5B | 44691 | IWB44691 | Kukri_c37442_662            | 23.4 |
| 5870 | 5B | 5805  | IWB5805  | BS00002191_51               | 23.4 |
| 5871 | 5B | 44690 | IWB44690 | Kukri_c37442_1002           | 23.4 |
| 5872 | 5B | 42745 | IWB42745 | Kukri_c23070_350            | 23.4 |
| 5873 | 5B | 77164 | IWA2597  | wsnp_Ex_c2132_4006417       | 23.4 |
| 5874 | 5B | 66093 | IWB66093 | TA008675-0589               | 23.4 |
| 5875 | 5B | 77163 | IWA2596  | wsnp_Ex_c2132_4004831       | 23.4 |
| 5876 | 5B | 20936 | IWB20936 | Ex_c5632_778                | 23.4 |
| 5877 | 5B | 44611 | IWB44611 | Kukri_c36789_230            | 23.4 |
| 5878 | 5B | 78462 | IWA4300  | wsnp_Ex_c5632_9904112       | 23.4 |
| 5879 | 5B | 14580 | IWB14580 | CAP8_c1968_64               | 23.6 |
| 5880 | 5B | 70531 | IWB70531 | Tdurum_contig35291_134      | 23.6 |
| 5881 | 5B | 78354 | IWA4158  | wsnp_Ex_c53011_56395185     | 23.6 |

|      |    |       |          |                         |      |
|------|----|-------|----------|-------------------------|------|
| 5882 | 5B | 47892 | IWB47892 | Kukri_c8168_290         | 23.6 |
| 5883 | 5B | 65517 | IWB65517 | TA002230-0886           | 23.6 |
| 5884 | 5B | 58307 | IWB58307 | RAC875_c47060_61        | 23.6 |
| 5885 | 5B | 80665 | IWA7272  | wsnp_Ku_c7199_12444840  | 23.6 |
| 5886 | 5B | 26138 | IWB26138 | Excalibur_c40439_75     | 23.6 |
| 5887 | 5B | 34781 | IWB34781 | IAAV3825                | 23.6 |
| 5888 | 5B | 4516  | IWB4516  | BobWhite_c8764_219      | 23.6 |
| 5889 | 5B | 21305 | IWB21305 | Ex_c7603_1315           | 23.6 |
| 5890 | 5B | 81201 | IWA8005  | wsnp_Ra_c5634_9952011   | 23.6 |
| 5891 | 5B | 78005 | IWA3706  | wsnp_Ex_c40022_47169698 | 23.6 |
| 5892 | 5B | 27987 | IWB27987 | Excalibur_c60683_908    | 23.6 |
| 5893 | 5B | 78553 | IWA4414  | wsnp_Ex_c60683_61038062 | 23.6 |
| 5894 | 5B | 78006 | IWA3707  | wsnp_Ex_c40022_47169752 | 23.6 |
| 5895 | 5B | 35584 | IWB35584 | IAAV9048                | 23.6 |
| 5896 | 5B | 13201 | IWB13201 | CAP12_c1419_574         | 23.6 |
| 5897 | 5B | 7200  | IWB7200  | BS00022662_51           | 23.6 |
| 5898 | 5B | 6899  | IWB6899  | BS00022086_51           | 23.6 |
| 5899 | 5B | 26887 | IWB26887 | Excalibur_c4765_1557    | 23.6 |
| 5900 | 5B | 20644 | IWB20644 | Ex_c40022_873           | 23.6 |
| 5901 | 5B | 24999 | IWB24999 | Excalibur_c30667_102    | 24.5 |
| 5902 | 5B | 69519 | IWB69519 | Tdurum_contig28408_340  | 24.7 |
| 5903 | 5B | 74026 | IWB74026 | Tdurum_contig98095_134  | 24.7 |
| 5904 | 5B | 8505  | IWB8505  | BS00048572_51           | 24.7 |
| 5905 | 5B | 12463 | IWB12463 | BS00110064_51           | 24.7 |
| 5906 | 5B | 70100 | IWB70100 | Tdurum_contig30729_263  | 24.7 |
| 5907 | 5B | 24957 | IWB24957 | Excalibur_c30346_54     | 24.7 |
| 5908 | 5B | 80634 | IWA7227  | wsnp_Ku_c6464_11320381  | 24.7 |
| 5909 | 5B | 12348 | IWB12348 | BS00108062_51           | 24.7 |
| 5910 | 5B | 67284 | IWB67284 | Tdurum_contig11757_575  | 24.7 |
| 5911 | 5B | 71914 | IWB71914 | Tdurum_contig48658_802  | 25.0 |
| 5912 | 5B | 70171 | IWB70171 | Tdurum_contig31131_198  | 25.0 |
| 5913 | 5B | 71912 | IWB71912 | Tdurum_contig48658_1022 | 25.0 |
| 5914 | 5B | 45956 | IWB45956 | Kukri_c49151_139        | 25.0 |
| 5915 | 5B | 78560 | IWA4422  | wsnp_Ex_c6100_10676217  | 25.0 |
| 5916 | 5B | 25222 | IWB25222 | Excalibur_c32630_104    | 27.0 |
| 5917 | 5B | 55844 | IWB55844 | RAC875_c25756_279       | 27.0 |
| 5918 | 5B | 44988 | IWB44988 | Kukri_c40046_237        | 33.3 |
| 5919 | 5B | 61034 | IWB61034 | RAC875_c9150_2945       | 33.3 |
| 5920 | 5B | 24022 | IWB24022 | Excalibur_c23709_358    | 33.3 |
| 5921 | 5B | 34986 | IWB34986 | IAAV52                  | 33.3 |
| 5922 | 5B | 24023 | IWB24023 | Excalibur_c23709_938    | 33.3 |
| 5923 | 5B | 65250 | IWB65250 | RFL_Contig697_1463      | 33.3 |
| 5924 | 5B | 40368 | IWB40368 | Kukri_c10530_1013       | 33.3 |
| 5925 | 5B | 76213 | IWA1380  | wsnp_Ex_c10674_17400603 | 33.3 |
| 5926 | 5B | 24385 | IWB24385 | Excalibur_c25948_366    | 33.3 |
| 5927 | 5B | 35160 | IWB35160 | IAAV6174                | 33.3 |
| 5928 | 5B | 40369 | IWB40369 | Kukri_c10530_1044       | 33.3 |
| 5929 | 5B | 66815 | IWB66815 | Tdurum_contig10911_155  | 33.3 |
| 5930 | 5B | 65958 | IWB65958 | TA005322-0586           | 33.3 |
| 5931 | 5B | 63206 | IWB63206 | RAC875_rep_c83825_236   | 33.5 |
| 5932 | 5B | 47848 | IWB47848 | Kukri_c805_325          | 34.4 |
| 5933 | 5B | 11879 | IWB11879 | BS00094480_51           | 34.4 |
| 5934 | 5B | 49648 | IWB49648 | Kukri_rep_c114331_346   | 35.2 |
| 5935 | 5B | 5390  | IWB5390  | BobWhite_rep_c63648_306 | 35.2 |

|      |    |       |          |                             |      |
|------|----|-------|----------|-----------------------------|------|
| 5936 | 5B | 37690 | IWB37690 | JD_c63005_896               | 35.2 |
| 5937 | 5B | 20326 | IWB20326 | Ex_c2615_564                | 35.2 |
| 5938 | 5B | 40314 | IWB40314 | Kukri_c10296_1074           | 35.2 |
| 5939 | 5B | 40315 | IWB40315 | Kukri_c10296_1512           | 35.2 |
| 5940 | 5B | 72937 | IWB72937 | Tdurum_contig63161_121      | 35.2 |
| 5941 | 5B | 79997 | IWA6383  | wsnp_Ku_c10296_17072695     | 35.2 |
| 5942 | 5B | 80355 | IWA6867  | wsnp_Ku_c29780_39658445     | 35.2 |
| 5943 | 5B | 77471 | IWA3025  | wsnp_Ex_c2615_4862266       | 35.2 |
| 5944 | 5B | 57415 | IWB57415 | RAC875_c38511_91            | 35.2 |
| 5945 | 5B | 78220 | IWA3985  | wsnp_Ex_c47152_52446529     | 35.2 |
| 5946 | 5B | 40681 | IWB40681 | Kukri_c11815_706            | 35.2 |
| 5947 | 5B | 79247 | IWA5283  | wsnp_Ex_rep_c66667_64981526 | 35.2 |
| 5948 | 5B | 78289 | IWA4074  | wsnp_Ex_c50413_54706626     | 35.2 |
| 5949 | 5B | 38178 | IWB38178 | Ku_c1083_1314               | 35.8 |
| 5950 | 5B | 40845 | IWB40845 | Kukri_c12562_453            | 35.8 |
| 5951 | 5B | 22738 | IWB22738 | Excalibur_c16135_253        | 35.8 |
| 5952 | 5B | 38179 | IWB38179 | Ku_c1083_375                | 35.8 |
| 5953 | 5B | 32971 | IWB32971 | GENE-2550_181               | 35.8 |
| 5954 | 5B | 77055 | IWA2453  | wsnp_Ex_c19724_28720939     | 35.8 |
| 5955 | 5B | 80060 | IWA6468  | wsnp_Ku_c12562_20256747     | 35.8 |
| 5956 | 5B | 77056 | IWA2454  | wsnp_Ex_c19724_28721128     | 35.8 |
| 5957 | 5B | 65086 | IWB65086 | RFL_Contig570_515           | 35.8 |
| 5958 | 5B | 38177 | IWB38177 | Ku_c1083_1261               | 35.8 |
| 5959 | 5B | 73106 | IWB73106 | Tdurum_contig68343_339      | 35.8 |
| 5960 | 5B | 70679 | IWB70679 | Tdurum_contig41907_1014     | 35.8 |
| 5961 | 5B | 76208 | IWA1374  | wsnp_Ex_c10644_17356566     | 35.8 |
| 5962 | 5B | 72578 | IWB72578 | Tdurum_contig57403_311      | 36.3 |
| 5963 | 5B | 28823 | IWB28823 | Excalibur_c76979_970        | 36.3 |
| 5964 | 5B | 45662 | IWB45662 | Kukri_c46476_551            | 36.3 |
| 5965 | 5B | 55641 | IWB55641 | RAC875_c2437_1569           | 36.3 |
| 5966 | 5B | 9767  | IWB9767  | BS00066289_51               | 36.3 |
| 5967 | 5B | 55646 | IWB55646 | RAC875_c24376_704           | 36.3 |
| 5968 | 5B | 65241 | IWB65241 | RFL_Contig658_1166          | 36.3 |
| 5969 | 5B | 66311 | IWB66311 | Tdurum_contig10172_176      | 36.3 |
| 5970 | 5B | 66469 | IWB66469 | Tdurum_contig10338_566      | 36.3 |
| 5971 | 5B | 73111 | IWB73111 | Tdurum_contig68472_291      | 36.3 |
| 5972 | 5B | 75518 | IWA265   | wsnp_BE495277B_Ta_2_5       | 36.3 |
| 5973 | 5B | 45559 | IWB45559 | Kukri_c45713_151            | 36.3 |
| 5974 | 5B | 57484 | IWB57484 | RAC875_c39141_55            | 36.3 |
| 5975 | 5B | 57882 | IWB57882 | RAC875_c4287_2984           | 36.3 |
| 5976 | 5B | 21641 | IWB21641 | Excalibur_c10444_2056       | 36.3 |
| 5977 | 5B | 73110 | IWB73110 | Tdurum_contig68472_115      | 36.3 |
| 5978 | 5B | 73416 | IWB73416 | Tdurum_contig77275_259      | 36.3 |
| 5979 | 5B | 72579 | IWB72579 | Tdurum_contig57403_589      | 36.3 |
| 5980 | 5B | 45663 | IWB45663 | Kukri_c46476_647            | 36.3 |
| 5981 | 5B | 54612 | IWB54612 | RAC875_c18106_421           | 36.6 |
| 5982 | 5B | 66934 | IWB66934 | Tdurum_contig11113_985      | 36.6 |
| 5983 | 5B | 35031 | IWB35031 | IAAV547                     | 37.5 |
| 5984 | 5B | 13747 | IWB13747 | CAP7_c1155_57               | 41.7 |
| 5985 | 5B | 20925 | IWB20925 | Ex_c5594_2630               | 41.7 |
| 5986 | 5B | 54773 | IWB54773 | RAC875_c19099_434           | 41.7 |
| 5987 | 5B | 54772 | IWB54772 | RAC875_c19099_308           | 41.7 |
| 5988 | 5B | 33476 | IWB33476 | GENE-3574_643               | 41.7 |
| 5989 | 5B | 8298  | IWB8298  | BS00042014_51               | 41.7 |

|      |    |       |          |                           |      |
|------|----|-------|----------|---------------------------|------|
| 5990 | 5B | 54653 | IWB54653 | RAC875_c18335_443         | 42.5 |
| 5991 | 5B | 6144  | IWB6144  | BS00009987_51             | 42.5 |
| 5992 | 5B | 26788 | IWB26788 | Excalibur_c4656_168       | 42.5 |
| 5993 | 5B | 35215 | IWB35215 | IAAV659                   | 42.5 |
| 5994 | 5B | 31745 | IWB31745 | GENE-0209_733             | 42.5 |
| 5995 | 5B | 28901 | IWB28901 | Excalibur_c79041_63       | 42.5 |
| 5996 | 5B | 47922 | IWB47922 | Kukri_c82296_367          | 42.5 |
| 5997 | 5B | 34489 | IWB34489 | IAAV2002                  | 42.5 |
| 5998 | 5B | 35784 | IWB35784 | IACX17304                 | 42.5 |
| 5999 | 5B | 42881 | IWB42881 | Kukri_c23894_464          | 42.5 |
| 6000 | 5B | 57803 | IWB57803 | RAC875_c42009_247         | 42.5 |
| 6001 | 5B | 63903 | IWB63903 | RFL_Contig2304_1569       | 43.1 |
| 6002 | 5B | 10479 | IWB10479 | BS00070613_51             | 43.1 |
| 6003 | 5B | 48402 | IWB48402 | Kukri_c95103_97           | 43.1 |
| 6004 | 5B | 35563 | IWB35563 | IAAV8929                  | 43.1 |
| 6005 | 5B | 982   | IWB982   | BobWhite_c16987_106       | 43.4 |
| 6006 | 5B | 7364  | IWB7364  | BS00022999_51             | 43.4 |
| 6007 | 5B | 31288 | IWB31288 | Excalibur_rep_c78514_400  | 43.4 |
| 6008 | 5B | 41225 | IWB41225 | Kukri_c14564_1108         | 43.4 |
| 6009 | 5B | 4204  | IWB4204  | BobWhite_c6633_240        | 43.4 |
| 6010 | 5B | 34364 | IWB34364 | IAAV1358                  | 43.4 |
| 6011 | 5B | 22494 | IWB22494 | Excalibur_c14753_899      | 43.4 |
| 6012 | 5B | 60388 | IWB60388 | RAC875_c7585_1097         | 43.4 |
| 6013 | 5B | 5915  | IWB5915  | BS00003879_51             | 43.4 |
| 6014 | 5B | 36091 | IWB36091 | IACX6009                  | 43.4 |
| 6015 | 5B | 59362 | IWB59362 | RAC875_c58316_428         | 43.4 |
| 6016 | 5B | 44284 | IWB44284 | Kukri_c34173_518          | 43.4 |
| 6017 | 5B | 47164 | IWB47164 | Kukri_c64573_443          | 43.4 |
| 6018 | 5B | 8427  | IWB8427  | BS00046512_51             | 43.4 |
| 6019 | 5B | 29576 | IWB29576 | Excalibur_c97089_263      | 43.4 |
| 6020 | 5B | 53032 | IWB53032 | RAC875_c10394_828         | 43.4 |
| 6021 | 5B | 65688 | IWB65688 | TA003435-0313             | 43.4 |
| 6022 | 5B | 65106 | IWB65106 | RFL_Contig5739_1542       | 43.4 |
| 6023 | 5B | 4206  | IWB4206  | BobWhite_c6633_395        | 43.4 |
| 6024 | 5B | 60155 | IWB60155 | RAC875_c68097_62          | 43.4 |
| 6025 | 5B | 80247 | IWA6721  | wsnp_Ku_c2185_4218722     | 43.4 |
| 6026 | 5B | 3630  | IWB3630  | BobWhite_c47964_969       | 43.4 |
| 6027 | 5B | 65107 | IWB65107 | RFL_Contig5739_641        | 43.4 |
| 6028 | 5B | 62712 | IWB62712 | RAC875_rep_c70643_107     | 43.4 |
| 6029 | 5B | 5301  | IWB5301  | BobWhite_rep_c62475_70    | 43.4 |
| 6030 | 5B | 4207  | IWB4207  | BobWhite_c6633_476        | 43.4 |
| 6031 | 5B | 3615  | IWB3615  | BobWhite_c4773_85         | 43.4 |
| 6032 | 5B | 79836 | IWA6112  | wsnp_JD_c5795_6955627     | 43.4 |
| 6033 | 5B | 5567  | IWB5567  | BobWhite_rep_c65835_277   | 43.4 |
| 6034 | 5B | 35154 | IWB35154 | IAAV6140                  | 43.4 |
| 6035 | 5B | 45713 | IWB45713 | Kukri_c46932_155          | 43.4 |
| 6036 | 5B | 29731 | IWB29731 | Excalibur_rep_c101527_180 | 43.4 |
| 6037 | 5B | 45399 | IWB45399 | Kukri_c43972_367          | 43.4 |
| 6038 | 5B | 56499 | IWB56499 | RAC875_c30584_75          | 43.4 |
| 6039 | 5B | 50323 | IWB50323 | Kukri_rep_c75841_121      | 43.4 |
| 6040 | 5B | 66159 | IWB66159 | Tdurum_contig100174_60    | 43.4 |
| 6041 | 5B | 69885 | IWB69885 | Tdurum_contig29771_76     | 47.0 |
| 6042 | 5B | 25367 | IWB25367 | Excalibur_c33675_410      | 59.1 |
| 6043 | 5B | 10362 | IWB10362 | BS00068805_51             | 59.1 |



|      |    |       |          |                             |      |
|------|----|-------|----------|-----------------------------|------|
| 6044 | 5B | 7745  | IWB7745  | BS00029869_51               | 59.1 |
| 6045 | 5B | 78854 | IWA4793  | wsnp_Ex_c8322_14030310      | 59.1 |
| 6046 | 5B | 6687  | IWB6687  | BS00020982_51               | 59.1 |
| 6047 | 5B | 70159 | IWB70159 | Tdurum_contig31075_260      | 59.1 |
| 6048 | 5B | 10167 | IWB10167 | BS00067841_51               | 59.1 |
| 6049 | 5B | 76945 | IWA2306  | wsnp_Ex_c1838_3461594       | 59.1 |
| 6050 | 5B | 38237 | IWB38237 | Ku_c11429_519               | 59.1 |
| 6051 | 5B | 6516  | IWB6516  | BS00012038_51               | 59.1 |
| 6052 | 5B | 25366 | IWB25366 | Excalibur_c33675_201        | 59.1 |
| 6053 | 5B | 72969 | IWB72969 | Tdurum_contig63997_587      | 59.1 |
| 6054 | 5B | 80053 | IWA6459  | wsnp_Ku_c12464_20125626     | 59.7 |
| 6055 | 5B | 2723  | IWB2723  | BobWhite_c34759_227         | 59.9 |
| 6056 | 5B | 3693  | IWB3693  | BobWhite_c48730_575         | 59.9 |
| 6057 | 5B | 12416 | IWB12416 | BS00109560_51               | 59.9 |
| 6058 | 5B | 46909 | IWB46909 | Kukri_c6113_189             | 59.9 |
| 6059 | 5B | 5476  | IWB5476  | BobWhite_rep_c64527_134     | 59.9 |
| 6060 | 5B | 49876 | IWB49876 | Kukri_rep_c69276_59         | 59.9 |
| 6061 | 5B | 72302 | IWB72302 | Tdurum_contig53072_1935     | 59.9 |
| 6062 | 5B | 53035 | IWB53035 | RAC875_c103988_92           | 59.9 |
| 6063 | 5B | 72624 | IWB72624 | Tdurum_contig58669_273      | 60.8 |
| 6064 | 5B | 10018 | IWB10018 | BS00067328_51               | 61.6 |
| 6065 | 5B | 39412 | IWB39412 | Ku_c4240_216                | 62.2 |
| 6066 | 5B | 69410 | IWB69410 | Tdurum_contig28016_254      | 62.2 |
| 6067 | 5B | 6424  | IWB6424  | BS00011514_51               | 62.8 |
| 6068 | 5B | 81457 | IWA8395  | wsnp_RFL_Contig2809_2587619 | 62.8 |
| 6069 | 5B | 22029 | IWB22029 | Excalibur_c12048_1756       | 63.9 |
| 6070 | 5B | 21097 | IWB21097 | Ex_c67086_584               | 63.9 |
| 6071 | 5B | 35480 | IWB35480 | IAAV8463                    | 63.9 |
| 6072 | 5B | 2786  | IWB2786  | BobWhite_c3552_1303         | 63.9 |
| 6073 | 5B | 76370 | IWA1577  | wsnp_Ex_c12048_19288999     | 63.9 |
| 6074 | 5B | 32852 | IWB32852 | GENE-2239_795               | 63.9 |
| 6075 | 5B | 81004 | IWA7733  | wsnp_Ra_c20970_30293227     | 63.9 |
| 6076 | 5B | 56628 | IWB56628 | RAC875_c31614_450           | 63.9 |
| 6077 | 5B | 2787  | IWB2787  | BobWhite_c3552_1588         | 63.9 |
| 6078 | 5B | 81003 | IWA7732  | wsnp_Ra_c20970_30293078     | 63.9 |
| 6079 | 5B | 66067 | IWB66067 | TA006199-1015               | 63.9 |
| 6080 | 5B | 34518 | IWB34518 | IAAV2219                    | 63.9 |
| 6081 | 5B | 58682 | IWB58682 | RAC875_c50755_244           | 63.9 |
| 6082 | 5B | 51408 | IWB51408 | Ra_c20970_500               | 63.9 |
| 6083 | 5B | 34511 | IWB34511 | IAAV2160                    | 63.9 |
| 6084 | 5B | 29442 | IWB29442 | Excalibur_c9391_1016        | 64.4 |
| 6085 | 5B | 31717 | IWB31717 | GENE-0168_7                 | 64.7 |
| 6086 | 5B | 65012 | IWB65012 | RFL_Contig5461_683          | 64.7 |
| 6087 | 5B | 7415  | IWB7415  | BS00023077_51               | 64.7 |
| 6088 | 5B | 27379 | IWB27379 | Excalibur_c5329_1335        | 65.3 |
| 6089 | 5B | 40210 | IWB40210 | Kukri_c10016_369            | 66.1 |
| 6090 | 5B | 46235 | IWB46235 | Kukri_c52257_991            | 66.7 |
| 6091 | 5B | 11984 | IWB11984 | BS00097066_51               | 66.7 |
| 6092 | 5B | 60268 | IWB60268 | RAC875_c7011_435            | 66.7 |
| 6093 | 5B | 49340 | IWB49340 | Kukri_rep_c108378_52        | 66.7 |
| 6094 | 5B | 230   | IWB230   | BobWhite_c11495_120         | 66.9 |
| 6095 | 5B | 7441  | IWB7441  | BS00023139_51               | 66.9 |
| 6096 | 5B | 64998 | IWB64998 | RFL_Contig539_1789          | 66.9 |
| 6097 | 5B | 67069 | IWB67069 | Tdurum_contig11411_100      | 67.5 |

|      |    |       |          |                         |      |
|------|----|-------|----------|-------------------------|------|
| 6098 | 5B | 65348 | IWB65348 | TA001138-0446           | 68.4 |
| 6099 | 5B | 6003  | IWB6003  | BS00005860_51           | 69.2 |
| 6100 | 5B | 36364 | IWB36364 | IACX9238                | 69.5 |
| 6101 | 5B | 6245  | IWB6245  | BS00010573_51           | 69.5 |
| 6102 | 5B | 76276 | IWA1460  | wsnp_Ex_c11265_18216936 | 69.5 |
| 6103 | 5B | 69502 | IWB69502 | Tdurum_contig28353_1110 | 71.8 |
| 6104 | 5B | 54309 | IWB54309 | RAC875_c16536_80        | 73.2 |
| 6105 | 5B | 6641  | IWB6641  | BS00017233_51           | 73.2 |
| 6106 | 5B | 7213  | IWB7213  | BS00022689_51           | 73.5 |
| 6107 | 5B | 7405  | IWB7405  | BS00023064_51           | 74.1 |
| 6108 | 5B | 68074 | IWB68074 | Tdurum_contig13773_321  | 74.1 |
| 6109 | 5B | 73174 | IWB73174 | Tdurum_contig70554_1004 | 75.2 |
| 6110 | 5B | 73175 | IWB73175 | Tdurum_contig70554_1006 | 75.2 |
| 6111 | 5B | 36025 | IWB36025 | IACX5792                | 75.2 |
| 6112 | 5B | 29637 | IWB29637 | Excalibur_c9868_1206    | 75.2 |
| 6113 | 5B | 5858  | IWB5858  | BS00003655_51           | 75.2 |
| 6114 | 5B | 64048 | IWB64048 | RFL_Contig2772_1693     | 75.2 |
| 6115 | 5B | 71849 | IWB71849 | Tdurum_contig47833_484  | 75.2 |
| 6116 | 5B | 68186 | IWB68186 | Tdurum_contig14326_597  | 75.8 |
| 6117 | 5B | 71390 | IWB71390 | Tdurum_contig43078_437  | 75.8 |
| 6118 | 5B | 6889  | IWB6889  | BS00022065_51           | 75.8 |
| 6119 | 5B | 21051 | IWB21051 | Ex_c6571_224            | 76.1 |
| 6120 | 5B | 72182 | IWB72182 | Tdurum_contig51422_127  | 78.3 |
| 6121 | 5B | 80289 | IWA6779  | wsnp_Ku_c25613_35580381 | 78.3 |
| 6122 | 5B | 73678 | IWB73678 | Tdurum_contig85060_121  | 78.3 |
| 6123 | 5B | 69164 | IWB69164 | Tdurum_contig25692_435  | 78.6 |
| 6124 | 5B | 8086  | IWB8086  | BS00037104_51           | 78.6 |
| 6125 | 5B | 73902 | IWB73902 | Tdurum_contig94033_717  | 78.6 |
| 6126 | 5B | 67067 | IWB67067 | Tdurum_contig11399_221  | 78.6 |
| 6127 | 5B | 73901 | IWB73901 | Tdurum_contig94033_487  | 78.6 |
| 6128 | 5B | 4061  | IWB4061  | BobWhite_c6017_1096     | 78.6 |
| 6129 | 5B | 8085  | IWB8085  | BS00037103_51           | 78.6 |
| 6130 | 5B | 4062  | IWB4062  | BobWhite_c6017_1147     | 78.6 |
| 6131 | 5B | 45589 | IWB45589 | Kukri_c45951_367        | 78.6 |
| 6132 | 5B | 6823  | IWB6823  | BS00021960_51           | 79.4 |
| 6133 | 5B | 73511 | IWB73511 | Tdurum_contig81548_426  | 79.4 |
| 6134 | 5B | 70781 | IWB70781 | Tdurum_contig42069_208  | 81.7 |
| 6135 | 5B | 71831 | IWB71831 | Tdurum_contig47627_442  | 84.0 |
| 6136 | 5B | 47014 | IWB47014 | Kukri_c62719_188        | 84.3 |
| 6137 | 5B | 79795 | IWA6053  | wsnp_JD_c4372_5494161   | 84.3 |
| 6138 | 5B | 26219 | IWB26219 | Excalibur_c41369_258    | 84.3 |
| 6139 | 5B | 423   | IWB423   | BobWhite_c12883_272     | 84.3 |
| 6140 | 5B | 73991 | IWB73991 | Tdurum_contig97407_196  | 84.3 |
| 6141 | 5B | 35993 | IWB35993 | IACX546                 | 84.6 |
| 6142 | 5B | 64707 | IWB64707 | RFL_Contig4520_749      | 84.6 |
| 6143 | 5B | 73816 | IWB73816 | Tdurum_contig92805_92   | 84.6 |
| 6144 | 5B | 73815 | IWB73815 | Tdurum_contig92805_226  | 84.6 |
| 6145 | 5B | 73814 | IWB73814 | Tdurum_contig92805_192  | 84.6 |
| 6146 | 5B | 72680 | IWB72680 | Tdurum_contig59729_196  | 84.8 |
| 6147 | 5B | 72681 | IWB72681 | Tdurum_contig59729_272  | 84.8 |
| 6148 | 5B | 12511 | IWB12511 | BS00110293_51           | 85.1 |
| 6149 | 5B | 6980  | IWB6980  | BS00022231_51           | 85.1 |
| 6150 | 5B | 7105  | IWB7105  | BS00022477_51           | 85.1 |
| 6151 | 5B | 36134 | IWB36134 | IACX6288                | 85.1 |

|      |    |       |          |                         |      |
|------|----|-------|----------|-------------------------|------|
| 6152 | 5B | 72666 | IWB72666 | Tdurum_contig59606_1754 | 85.1 |
| 6153 | 5B | 7744  | IWB7744  | BS00029852_51           | 85.1 |
| 6154 | 5B | 72667 | IWB72667 | Tdurum_contig59606_2411 | 85.1 |
| 6155 | 5B | 71387 | IWB71387 | Tdurum_contig43012_1520 | 85.1 |
| 6156 | 5B | 162   | IWB162   | BobWhite_c11038_605     | 85.1 |
| 6157 | 5B | 75132 | IWB75132 | tplb0057d20_531         | 85.1 |
| 6158 | 5B | 64600 | IWB64600 | RFL_Contig4167_1164     | 85.1 |
| 6159 | 5B | 73499 | IWB73499 | Tdurum_contig81373_116  | 85.1 |
| 6160 | 5B | 8083  | IWB8083  | BS00037023_51           | 85.1 |
| 6161 | 5B | 3521  | IWB3521  | BobWhite_c46573_367     | 85.4 |
| 6162 | 5B | 2125  | IWB2125  | BobWhite_c2767_72       | 86.8 |
| 6163 | 5B | 11985 | IWB11985 | BS00097105_51           | 86.8 |
| 6164 | 5B | 2969  | IWB2969  | BobWhite_c38408_71      | 86.8 |
| 6165 | 5B | 47938 | IWB47938 | Kukri_c8267_88          | 86.8 |
| 6166 | 5B | 73524 | IWB73524 | Tdurum_contig8171_1680  | 86.8 |
| 6167 | 5B | 73523 | IWB73523 | Tdurum_contig8171_1602  | 86.8 |
| 6168 | 5B | 73526 | IWB73526 | Tdurum_contig8171_1772  | 86.8 |
| 6169 | 5B | 73525 | IWB73525 | Tdurum_contig8171_1712  | 86.8 |
| 6170 | 5B | 49556 | IWB49556 | Kukri_rep_c112425_98    | 86.8 |
| 6171 | 5B | 73522 | IWB73522 | Tdurum_contig8171_1548  | 86.8 |
| 6172 | 5B | 73527 | IWB73527 | Tdurum_contig8171_1783  | 86.8 |
| 6173 | 5B | 60224 | IWB60224 | RAC875_c6890_150        | 86.8 |
| 6174 | 5B | 8583  | IWB8583  | BS00050057_51           | 86.8 |
| 6175 | 5B | 6532  | IWB6532  | BS00012140_51           | 92.2 |
| 6176 | 5B | 71624 | IWB71624 | Tdurum_contig45588_730  | 92.2 |
| 6177 | 5B | 56345 | IWB56345 | RAC875_c29488_56        | 92.8 |
| 6178 | 5B | 70546 | IWB70546 | Tdurum_contig35470_227  | 92.8 |
| 6179 | 5B | 8173  | IWB8173  | BS00039487_51           | 92.8 |
| 6180 | 5B | 78209 | IWA3972  | wsnp_Ex_c46494_51987109 | 92.8 |
| 6181 | 5B | 12043 | IWB12043 | BS00098520_51           | 93.3 |
| 6182 | 5B | 5837  | IWB5837  | BS00003586_51           | 93.3 |
| 6183 | 5B | 50470 | IWB50470 | Kukri_rep_c89008_974    | 93.3 |
| 6184 | 5B | 71748 | IWB71748 | Tdurum_contig47033_241  | 93.3 |
| 6185 | 5B | 71749 | IWB71749 | Tdurum_contig47033_367  | 93.3 |
| 6186 | 5B | 76360 | IWA1564  | wsnp_Ex_c11951_19164786 | 93.6 |
| 6187 | 5B | 73180 | IWB73180 | Tdurum_contig70651_234  | 93.6 |
| 6188 | 5B | 26671 | IWB26671 | Excalibur_c45488_148    | 93.6 |
| 6189 | 5B | 52117 | IWB52117 | Ra_c45135_456           | 93.6 |
| 6190 | 5B | 73548 | IWB73548 | Tdurum_contig8210_317   | 93.9 |
| 6191 | 5B | 68167 | IWB68167 | Tdurum_contig14200_240  | 93.9 |
| 6192 | 5B | 71491 | IWB71491 | Tdurum_contig44115_720  | 93.9 |
| 6193 | 5B | 71489 | IWB71489 | Tdurum_contig44115_405  | 93.9 |
| 6194 | 5B | 11579 | IWB11579 | BS00088733_51           | 93.9 |
| 6195 | 5B | 71820 | IWB71820 | Tdurum_contig47512_576  | 93.9 |
| 6196 | 5B | 71488 | IWB71488 | Tdurum_contig44115_132  | 93.9 |
| 6197 | 5B | 71490 | IWB71490 | Tdurum_contig44115_561  | 93.9 |
| 6198 | 5B | 71818 | IWB71818 | Tdurum_contig47512_1124 | 93.9 |
| 6199 | 5B | 7308  | IWB7308  | BS00022886_51           | 93.9 |
| 6200 | 5B | 71821 | IWB71821 | Tdurum_contig47512_972  | 93.9 |
| 6201 | 5B | 59686 | IWB59686 | RAC875_c62400_267       | 93.9 |
| 6202 | 5B | 59688 | IWB59688 | RAC875_c62400_840       | 93.9 |
| 6203 | 5B | 73833 | IWB73833 | Tdurum_contig92938_632  | 93.9 |
| 6204 | 5B | 59689 | IWB59689 | RAC875_c62400_924       | 93.9 |
| 6205 | 5B | 65531 | IWB65531 | TA002298-1315           | 93.9 |

|      |    |       |          |                             |       |
|------|----|-------|----------|-----------------------------|-------|
| 6206 | 5B | 44481 | IWB44481 | Kukri_c3576_1212            | 93.9  |
| 6207 | 5B | 71819 | IWB71819 | Tdurum_contig47512_1217     | 93.9  |
| 6208 | 5B | 59687 | IWB59687 | RAC875_c62400_639           | 93.9  |
| 6209 | 5B | 62048 | IWB62048 | RAC875_rep_c111379_703      | 93.9  |
| 6210 | 5B | 64466 | IWB64466 | RFL_Contig372_339           | 94.2  |
| 6211 | 5B | 11392 | IWB11392 | BS00084907_51               | 94.5  |
| 6212 | 5B | 6924  | IWB6924  | BS00022139_51               | 94.5  |
| 6213 | 5B | 7556  | IWB7556  | BS00024814_51               | 94.7  |
| 6214 | 5B | 12106 | IWB12106 | BS00099986_51               | 94.7  |
| 6215 | 5B | 48112 | IWB48112 | Kukri_c87328_116            | 95.0  |
| 6216 | 5B | 72617 | IWB72617 | Tdurum_contig58293_582      | 95.6  |
| 6217 | 5B | 72615 | IWB72615 | Tdurum_contig58293_437      | 95.6  |
| 6218 | 5B | 72616 | IWB72616 | Tdurum_contig58293_440      | 95.6  |
| 6219 | 5B | 72618 | IWB72618 | Tdurum_contig58293_755      | 95.6  |
| 6220 | 5B | 27453 | IWB27453 | Excalibur_c54134_84         | 95.6  |
| 6221 | 5B | 5599  | IWB5599  | BobWhite_rep_c66196_464     | 95.6  |
| 6222 | 5B | 63462 | IWB63462 | RAC875_s117042_147          | 95.6  |
| 6223 | 5B | 8195  | IWB8195  | BS00039874_51               | 95.6  |
| 6224 | 5B | 74041 | IWB74041 | Tdurum_contig98477_350      | 95.6  |
| 6225 | 5B | 26458 | IWB26458 | Excalibur_c43534_878        | 96.1  |
| 6226 | 5B | 29437 | IWB29437 | Excalibur_c9370_944         | 97.6  |
| 6227 | 5B | 764   | IWB764   | BobWhite_c15241_604         | 103.0 |
| 6228 | 5B | 9523  | IWB9523  | BS00065352_51               | 103.0 |
| 6229 | 5B | 3327  | IWB3327  | BobWhite_c43731_313         | 103.3 |
| 6230 | 5B | 71986 | IWB71986 | Tdurum_contig49583_669      | 103.3 |
| 6231 | 5B | 64985 | IWB64985 | RFL_Contig5337_1453         | 103.3 |
| 6232 | 5B | 69394 | IWB69394 | Tdurum_contig27973_306      | 103.3 |
| 6233 | 5B | 56115 | IWB56115 | RAC875_c278_1801            | 103.3 |
| 6234 | 5B | 9652  | IWB9652  | BS00065864_51               | 104.7 |
| 6235 | 5B | 26719 | IWB26719 | Excalibur_c46000_203        | 105.0 |
| 6236 | 5B | 27497 | IWB27497 | Excalibur_c54637_123        | 109.2 |
| 6237 | 5B | 40757 | IWB40757 | Kukri_c1214_544             | 109.8 |
| 6238 | 5B | 40755 | IWB40755 | Kukri_c1214_437             | 109.8 |
| 6239 | 5B | 77733 | IWA3359  | wsnp_Ex_c3175_5864335       | 109.8 |
| 6240 | 5B | 40759 | IWB40759 | Kukri_c1214_948             | 109.8 |
| 6241 | 5B | 79940 | IWA6271  | wsnp_JD_rep_c50403_34392266 | 109.8 |
| 6242 | 5B | 65055 | IWB65055 | RFL_Contig5616_1779         | 109.8 |
| 6243 | 5B | 77734 | IWA3360  | wsnp_Ex_c3175_5864594       | 109.8 |
| 6244 | 5B | 40750 | IWB40750 | Kukri_c1214_2247            | 109.8 |
| 6245 | 5B | 77732 | IWA3358  | wsnp_Ex_c3175_5864291       | 109.8 |
| 6246 | 5B | 40754 | IWB40754 | Kukri_c1214_2686            | 109.8 |
| 6247 | 5B | 63871 | IWB63871 | RFL_Contig2219_1304         | 109.8 |
| 6248 | 5B | 46814 | IWB46814 | Kukri_c59657_805            | 109.8 |
| 6249 | 5B | 23974 | IWB23974 | Excalibur_c23452_401        | 109.8 |
| 6250 | 5B | 46237 | IWB46237 | Kukri_c5228_1011            | 109.8 |
| 6251 | 5B | 4387  | IWB4387  | BobWhite_c7818_278          | 110.3 |
| 6252 | 5B | 24417 | IWB24417 | Excalibur_c2618_1412        | 110.6 |
| 6253 | 5B | 74021 | IWB74021 | Tdurum_contig97942_51       | 110.6 |
| 6254 | 5B | 74020 | IWB74020 | Tdurum_contig97942_163      | 110.6 |
| 6255 | 5B | 24418 | IWB24418 | Excalibur_c2618_1723        | 110.6 |
| 6256 | 5B | 28628 | IWB28628 | Excalibur_c72450_483        | 111.7 |
| 6257 | 5B | 29462 | IWB29462 | Excalibur_c94390_60         | 115.6 |
| 6258 | 5B | 10359 | IWB10359 | BS00068775_51               | 115.6 |
| 6259 | 5B | 66258 | IWB66258 | Tdurum_contig10100_659      | 116.2 |

|      |    |       |          |                             |       |
|------|----|-------|----------|-----------------------------|-------|
| 6260 | 5B | 72674 | IWB72674 | Tdurum_contig59667_225      | 116.2 |
| 6261 | 5B | 28602 | IWB28602 | Excalibur_c71712_180        | 116.2 |
| 6262 | 5B | 64287 | IWB64287 | RFL_Contig3285_1009         | 116.4 |
| 6263 | 5B | 29686 | IWB29686 | Excalibur_rep_c100012_1145  | 117.6 |
| 6264 | 5B | 73352 | IWB73352 | Tdurum_contig76150_816      | 117.6 |
| 6265 | 5B | 25477 | IWB25477 | Excalibur_c34579_263        | 117.6 |
| 6266 | 5B | 61646 | IWB61646 | RAC875_rep_c106941_128      | 117.6 |
| 6267 | 5B | 79637 | IWA5802  | wsnp_JD_c12221_12509932     | 117.6 |
| 6268 | 5B | 78486 | IWA4329  | wsnp_Ex_c57209_59016692     | 117.6 |
| 6269 | 5B | 39994 | IWB39994 | Ku_c7546_861                | 117.6 |
| 6270 | 5B | 28158 | IWB28158 | Excalibur_c62990_114        | 117.6 |
| 6271 | 5B | 47640 | IWB47640 | Kukri_c7546_3035            | 117.6 |
| 6272 | 5B | 54957 | IWB54957 | RAC875_c20161_821           | 117.6 |
| 6273 | 5B | 64061 | IWB64061 | RFL_Contig2791_1541         | 117.6 |
| 6274 | 5B | 79638 | IWA5803  | wsnp_JD_c12221_12509984     | 117.6 |
| 6275 | 5B | 71272 | IWB71272 | Tdurum_contig42526_73       | 117.6 |
| 6276 | 5B | 40466 | IWB40466 | Kukri_c10913_480            | 117.6 |
| 6277 | 5B | 11015 | IWB11015 | BS00078515_51               | 118.1 |
| 6278 | 5B | 46089 | IWB46089 | Kukri_c50720_397            | 118.1 |
| 6279 | 5B | 54609 | IWB54609 | RAC875_c18094_69            | 118.1 |
| 6280 | 5B | 23976 | IWB23976 | Excalibur_c23457_225        | 118.1 |
| 6281 | 5B | 78940 | IWA4903  | wsnp_Ex_c9362_15546626      | 118.1 |
| 6282 | 5B | 28598 | IWB28598 | Excalibur_c71602_591        | 130.3 |
| 6283 | 5B | 29548 | IWB29548 | Excalibur_c96435_216        | 130.3 |
| 6284 | 5B | 28597 | IWB28597 | Excalibur_c71602_420        | 130.3 |
| 6285 | 5B | 29164 | IWB29164 | Excalibur_c86388_413        | 130.3 |
| 6286 | 5B | 80146 | IWA6578  | wsnp_Ku_c16116_24914991     | 130.6 |
| 6287 | 5B | 26850 | IWB26850 | Excalibur_c47234_1012       | 130.6 |
| 6288 | 5B | 24987 | IWB24987 | Excalibur_c30587_599        | 130.6 |
| 6289 | 5B | 61527 | IWB61527 | RAC875_rep_c105927_650      | 130.6 |
| 6290 | 5B | 77228 | IWA2682  | wsnp_Ex_c2207_4136036       | 130.6 |
| 6291 | 5B | 45643 | IWB45643 | Kukri_c46310_84             | 130.6 |
| 6292 | 5B | 47085 | IWB47085 | Kukri_c637_1679             | 130.6 |
| 6293 | 5B | 47089 | IWB47089 | Kukri_c637_583              | 130.6 |
| 6294 | 5B | 77227 | IWA2681  | wsnp_Ex_c2207_4135530       | 130.6 |
| 6295 | 5B | 44679 | IWB44679 | Kukri_c3734_400             | 130.6 |
| 6296 | 5B | 44680 | IWB44680 | Kukri_c3734_438             | 130.6 |
| 6297 | 5B | 46556 | IWB46556 | Kukri_c55885_110            | 130.6 |
| 6298 | 5B | 46557 | IWB46557 | Kukri_c55885_139            | 130.6 |
| 6299 | 5B | 47087 | IWB47087 | Kukri_c637_517              | 130.6 |
| 6300 | 5B | 47090 | IWB47090 | Kukri_c637_827              | 130.6 |
| 6301 | 5B | 47091 | IWB47091 | Kukri_c637_974              | 130.6 |
| 6302 | 5D | 5730  | IWB5730  | BobWhite_s67669_117         | 0.0   |
| 6303 | 5D | 5734  | IWB5734  | BS00000020_51               | 0.0   |
| 6304 | 5D | 780   | IWB780   | BobWhite_c15390_95          | 0.0   |
| 6305 | 5D | 15785 | IWB15785 | D_contig15408_376           | 0.9   |
| 6306 | 5D | 6100  | IWB6100  | BS00009699_51               | 3.8   |
| 6307 | 5D | 15297 | IWB15297 | D_contig04203_490           | 4.4   |
| 6308 | 5D | 16748 | IWB16748 | D_contig38148_212           | 5.5   |
| 6309 | 5D | 81512 | IWA8499  | wsnp_RFL_Contig3661_3867818 | 5.8   |
| 6310 | 5D | 18626 | IWB18626 | D_GBUVHFX01D3ZGK_243        | 6.1   |
| 6311 | 5D | 57782 | IWB57782 | RAC875_c41830_186           | 8.1   |
| 6312 | 5D | 63046 | IWB63046 | RAC875_rep_c74985_362       | 8.1   |
| 6313 | 5D | 35558 | IWB35558 | IAAV8896                    | 8.6   |

|      |    |       |          |                             |      |
|------|----|-------|----------|-----------------------------|------|
| 6314 | 5D | 45153 | IWB45153 | Kukri_c4158_753             | 8.6  |
| 6315 | 5D | 42321 | IWB42321 | Kukri_c20444_1238           | 8.6  |
| 6316 | 5D | 52486 | IWB52486 | Ra_c6993_1750               | 10.7 |
| 6317 | 5D | 16805 | IWB16805 | D_contig47905_414           | 11.0 |
| 6318 | 5D | 25818 | IWB25818 | Excalibur_c37393_75         | 13.1 |
| 6319 | 5D | 16123 | IWB16123 | D_contig23016_198           | 13.6 |
| 6320 | 5D | 6703  | IWB6703  | BS00021670_51               | 13.9 |
| 6321 | 5D | 4166  | IWB4166  | BobWhite_c6444_66           | 13.9 |
| 6322 | 5D | 80654 | IWA7254  | wsnp_Ku_c6950_12032896      | 14.5 |
| 6323 | 5D | 81460 | IWA8400  | wsnp_RFL_Contig2840_2647753 | 14.5 |
| 6324 | 5D | 16728 | IWB16728 | D_contig37534_218           | 14.5 |
| 6325 | 5D | 18848 | IWB18848 | D_GCE8AKX01EN4D2_337        | 15.0 |
| 6326 | 5D | 16856 | IWB16856 | D_contig52724_224           | 15.3 |
| 6327 | 5D | 18383 | IWB18383 | D_GBF1XID01CPTHP_149        | 15.3 |
| 6328 | 5D | 58749 | IWB58749 | RAC875_c51455_182           | 15.8 |
| 6329 | 5D | 541   | IWB541   | BobWhite_c1372_133          | 15.8 |
| 6330 | 5D | 65574 | IWB65574 | TA002565-0478               | 16.1 |
| 6331 | 5D | 39447 | IWB39447 | Ku_c4397_1536               | 16.1 |
| 6332 | 5D | 79314 | IWA5366  | wsnp_Ex_rep_c67164_65655648 | 16.1 |
| 6333 | 5D | 62739 | IWB62739 | RAC875_rep_c70941_685       | 16.9 |
| 6334 | 5D | 6788  | IWB6788  | BS00021901_51               | 16.9 |
| 6335 | 5D | 60391 | IWB60391 | RAC875_c7587_211            | 16.9 |
| 6336 | 5D | 78655 | IWA4550  | wsnp_Ex_c65985_64188864     | 16.9 |
| 6337 | 5D | 80850 | IWA7517  | wsnp_Ku_rep_c72922_72561803 | 16.9 |
| 6338 | 5D | 58605 | IWB58605 | RAC875_c50011_126           | 17.2 |
| 6339 | 5D | 55914 | IWB55914 | RAC875_c26265_117           | 17.2 |
| 6340 | 5D | 18686 | IWB18686 | D_GBUVHFX02FY8QG_158        | 17.2 |
| 6341 | 5D | 79794 | IWA6052  | wsnp_JD_c43684_30430706     | 17.2 |
| 6342 | 5D | 56458 | IWB56458 | RAC875_c30315_692           | 17.2 |
| 6343 | 5D | 55915 | IWB55915 | RAC875_c26265_146           | 17.2 |
| 6344 | 5D | 58111 | IWB58111 | RAC875_c4504_51             | 17.5 |
| 6345 | 5D | 40957 | IWB40957 | Kukri_c13045_302            | 18.6 |
| 6346 | 5D | 63711 | IWB63711 | RFL_Contig1702_460          | 19.8 |
| 6347 | 5D | 50247 | IWB50247 | Kukri_rep_c73094_348        | 20.6 |
| 6348 | 5D | 17594 | IWB17594 | D_F5XZDLF02F2TKA_173        | 20.6 |
| 6349 | 5D | 47309 | IWB47309 | Kukri_c6649_641             | 20.6 |
| 6350 | 5D | 42072 | IWB42072 | Kukri_c19108_2614           | 20.6 |
| 6351 | 5D | 46229 | IWB46229 | Kukri_c52161_263            | 20.6 |
| 6352 | 5D | 30040 | IWB30040 | Excalibur_rep_c104569_101   | 20.9 |
| 6353 | 5D | 53304 | IWB53304 | RAC875_c11298_245           | 21.4 |
| 6354 | 5D | 5485  | IWB5485  | BobWhite_rep_c64642_64      | 21.4 |
| 6355 | 5D | 59917 | IWB59917 | RAC875_c65147_730           | 21.4 |
| 6356 | 5D | 63812 | IWB63812 | RFL_Contig2033_482          | 22.6 |
| 6357 | 5D | 22092 | IWB22092 | Excalibur_c12440_1292       | 22.9 |
| 6358 | 5D | 17026 | IWB17026 | D_contig66399_332           | 22.9 |
| 6359 | 5D | 36656 | IWB36656 | Jagger_c5801_167            | 23.4 |
| 6360 | 5D | 62829 | IWB62829 | RAC875_rep_c72023_267       | 27.7 |
| 6361 | 5D | 35889 | IWB35889 | IACX2960                    | 28.8 |
| 6362 | 5D | 17898 | IWB17898 | D_GA8KES402HYT7F_263        | 30.8 |
| 6363 | 5D | 18994 | IWB18994 | D_GDEEGVY01CEIGE_161        | 32.0 |
| 6364 | 5D | 25542 | IWB25542 | Excalibur_c35047_271        | 35.2 |
| 6365 | 5D | 13843 | IWB13843 | CAP7_c1669_191              | 37.6 |
| 6366 | 5D | 18463 | IWB18463 | D_GBF1XID02ILGAO_466        | 45.7 |
| 6367 | 5D | 58392 | IWB58392 | RAC875_c47962_259           | 45.7 |

|      |    |       |          |                             |       |
|------|----|-------|----------|-----------------------------|-------|
| 6368 | 5D | 29114 | IWB29114 | Excalibur_c8478_273         | 46.5  |
| 6369 | 5D | 19312 | IWB19312 | D_GDS7LZN01CYS6N_229        | 46.5  |
| 6370 | 5D | 1781  | IWB1781  | BobWhite_c23972_967         | 49.8  |
| 6371 | 5D | 18281 | IWB18281 | D_GBB4FNX02HAJIG_61         | 50.1  |
| 6372 | 5D | 18140 | IWB18140 | D_GB5Y7FA02JG2TQ_264        | 51.3  |
| 6373 | 5D | 11972 | IWB11972 | BS00096756_51               | 51.6  |
| 6374 | 5D | 15299 | IWB15299 | D_contig04281_502           | 51.6  |
| 6375 | 5D | 24958 | IWB24958 | Excalibur_c30358_1147       | 51.6  |
| 6376 | 5D | 60109 | IWB60109 | RAC875_c67549_101           | 51.6  |
| 6377 | 5D | 15782 | IWB15782 | D_contig15384_170           | 52.7  |
| 6378 | 5D | 31214 | IWB31214 | Excalibur_rep_c73156_287    | 59.2  |
| 6379 | 5D | 15463 | IWB15463 | D_contig08129_415           | 59.2  |
| 6380 | 5D | 6794  | IWB6794  | BS00021911_51               | 61.2  |
| 6381 | 5D | 7550  | IWB7550  | BS00024761_51               | 61.2  |
| 6382 | 5D | 7425  | IWB7425  | BS00023103_51               | 61.2  |
| 6383 | 5D | 11816 | IWB11816 | BS00093588_51               | 61.2  |
| 6384 | 5D | 50039 | IWB50039 | Kukri_rep_c70578_346        | 65.1  |
| 6385 | 5D | 19279 | IWB19279 | D_GDS7LZN01AWY50_206        | 69.0  |
| 6386 | 5D | 18134 | IWB18134 | D_GB5Y7FA02IZ73U_152        | 72.3  |
| 6387 | 5D | 17912 | IWB17912 | D_GA8KES402IPEKV_90         | 75.6  |
| 6388 | 5D | 19332 | IWB19332 | D_GDS7LZN01DW87V_234        | 75.9  |
| 6389 | 5D | 81417 | IWA8327  | wsnp_RFL_Contig2346_1854360 | 75.9  |
| 6390 | 5D | 15934 | IWB15934 | D_contig18655_445           | 75.9  |
| 6391 | 5D | 16966 | IWB16966 | D_contig62661_72            | 75.9  |
| 6392 | 5D | 75071 | IWB75071 | tplb0055c05_1689            | 75.9  |
| 6393 | 5D | 18271 | IWB18271 | D_GBB4FNX02GXFL1_268        | 75.9  |
| 6394 | 5D | 2148  | IWB2148  | BobWhite_c27870_103         | 75.9  |
| 6395 | 5D | 17676 | IWB17676 | D_F5XZDLF02IP5IR_228        | 76.4  |
| 6396 | 5D | 18497 | IWB18497 | D_GBQ4KXB01BMEK8_423        | 77.6  |
| 6397 | 5D | 28790 | IWB28790 | Excalibur_c76347_77         | 78.2  |
| 6398 | 5D | 67148 | IWB67148 | Tdurum_contig11553_534      | 78.5  |
| 6399 | 5D | 39731 | IWB39731 | Ku_c6176_938                | 79.0  |
| 6400 | 5D | 36749 | IWB36749 | Jagger_c754_272             | 82.3  |
| 6401 | 5D | 18389 | IWB18389 | D_GBF1XID01CVZMX_132        | 82.3  |
| 6402 | 5D | 16900 | IWB16900 | D_contig56923_144           | 83.5  |
| 6403 | 5D | 65770 | IWB65770 | TA004010-0869               | 83.5  |
| 6404 | 5D | 31501 | IWB31501 | Excalibur_s107041_192       | 89.4  |
| 6405 | 5D | 2089  | IWB2089  | BobWhite_c2730_245          | 93.2  |
| 6406 | 5D | 53151 | IWB53151 | RAC875_c107024_454          | 95.2  |
| 6407 | 5D | 37349 | IWB37349 | JD_c330_1246                | 96.0  |
| 6408 | 5D | 65355 | IWB65355 | TA001166-0603               | 96.9  |
| 6409 | 5D | 15855 | IWB15855 | D_contig17143_54            | 100.7 |
| 6410 | 5D | 21491 | IWB21491 | Excalibur_c10003_683        | 100.7 |
| 6411 | 5D | 22975 | IWB22975 | Excalibur_c17489_843        | 104.2 |
| 6412 | 5D | 29990 | IWB29990 | Excalibur_rep_c103850_753   | 106.8 |
| 6413 | 5D | 49837 | IWB49837 | Kukri_rep_c69008_811        | 107.4 |
| 6414 | 5D | 80599 | IWA7177  | wsnp_Ku_c55961_59662821     | 109.4 |
| 6415 | 5D | 29359 | IWB29359 | Excalibur_c91745_337        | 109.4 |
| 6416 | 5D | 17208 | IWB17208 | D_contig78113_349           | 110.0 |
| 6417 | 5D | 80016 | IWA6409  | wsnp_Ku_c10877_17896883     | 110.8 |
| 6418 | 5D | 4550  | IWB4550  | BobWhite_c8945_134          | 110.8 |
| 6419 | 5D | 41848 | IWB41848 | Kukri_c17942_239            | 110.8 |
| 6420 | 5D | 17228 | IWB17228 | D_contig79410_237           | 110.8 |
| 6421 | 5D | 37841 | IWB37841 | JD_c825_1450                | 111.1 |

|      |    |       |          |                         |       |
|------|----|-------|----------|-------------------------|-------|
| 6422 | 5D | 14252 | IWB14252 | CAP7_c756_531           | 111.4 |
| 6423 | 5D | 26695 | IWB26695 | Excalibur_c4570_451     | 111.4 |
| 6424 | 5D | 6593  | IWB6593  | BS00013935_51           | 111.9 |
| 6425 | 5D | 12263 | IWB12263 | BS00105939_51           | 111.9 |
| 6426 | 5D | 24419 | IWB24419 | Excalibur_c2618_468     | 111.9 |
| 6427 | 5D | 17701 | IWB17701 | D_GA8KES401AL4GG_122    | 111.9 |
| 6428 | 5D | 11592 | IWB11592 | BS00089081_51           | 111.9 |
| 6429 | 5D | 41252 | IWB41252 | Kukri_c14692_75         | 111.9 |
| 6430 | 5D | 24648 | IWB24648 | Excalibur_c2795_1518    | 111.9 |
| 6431 | 5D | 19299 | IWB19299 | D_GDS7LZN01CBWNE_99     | 111.9 |
| 6432 | 5D | 39469 | IWB39469 | Ku_c45387_733           | 111.9 |
| 6433 | 5D | 51496 | IWB51496 | Ra_c2279_718            | 111.9 |
| 6434 | 5D | 39574 | IWB39574 | Ku_c5228_417            | 111.9 |
| 6435 | 5D | 39573 | IWB39573 | Ku_c5228_402            | 111.9 |
| 6436 | 5D | 43020 | IWB43020 | Kukri_c24695_273        | 111.9 |
| 6437 | 5D | 17362 | IWB17362 | D_F1BEJMU02I00U2_83     | 111.9 |
| 6438 | 5D | 443   | IWB443   | BobWhite_c13030_406     | 111.9 |
| 6439 | 5D | 35046 | IWB35046 | IAAV5570                | 111.9 |
| 6440 | 5D | 45525 | IWB45525 | Kukri_c45387_380        | 111.9 |
| 6441 | 5D | 76927 | IWA2276  | wsnp_Ex_c17928_26697183 | 111.9 |
| 6442 | 5D | 53671 | IWB53671 | RAC875_c13169_459       | 111.9 |
| 6443 | 5D | 11591 | IWB11591 | BS00089078_51           | 111.9 |
| 6444 | 5D | 51498 | IWB51498 | Ra_c2279_730            | 111.9 |
| 6445 | 5D | 40756 | IWB40756 | Kukri_c1214_474         | 111.9 |
| 6446 | 5D | 22335 | IWB22335 | Excalibur_c13901_98     | 111.9 |
| 6447 | 5D | 47729 | IWB47729 | Kukri_c7786_81          | 111.9 |
| 6448 | 5D | 56960 | IWB56960 | RAC875_c34515_86        | 112.2 |
| 6449 | 5D | 9561  | IWB9561  | BS00065473_51           | 117.8 |
| 6450 | 5D | 15705 | IWB15705 | D_contig13855_208       | 123.3 |
| 6451 | 5D | 26811 | IWB26811 | Excalibur_c46789_702    | 123.9 |
| 6452 | 6A | 2381  | IWB2381  | BobWhite_c30632_331     | 0.0   |
| 6453 | 6A | 9013  | IWB9013  | BS00063170_51           | 0.6   |
| 6454 | 6A | 47513 | IWB47513 | Kukri_c7146_870         | 0.8   |
| 6455 | 6A | 44270 | IWB44270 | Kukri_c34036_229        | 0.8   |
| 6456 | 6A | 54332 | IWB54332 | RAC875_c16649_322       | 0.8   |
| 6457 | 6A | 71551 | IWB71551 | Tdurum_contig44853_1083 | 0.8   |
| 6458 | 6A | 35508 | IWB35508 | IAAV8633                | 0.8   |
| 6459 | 6A | 11199 | IWB11199 | BS00081603_51           | 0.8   |
| 6460 | 6A | 69382 | IWB69382 | Tdurum_contig27939_357  | 0.8   |
| 6461 | 6A | 4181  | IWB4181  | BobWhite_c6527_222      | 0.8   |
| 6462 | 6A | 2694  | IWB2694  | BobWhite_c344_317       | 0.8   |
| 6463 | 6A | 32641 | IWB32641 | GENE-1756_564           | 2.0   |
| 6464 | 6A | 11959 | IWB11959 | BS00096519_51           | 2.0   |
| 6465 | 6A | 64917 | IWB64917 | RFL_Contig5170_1904     | 2.8   |
| 6466 | 6A | 22216 | IWB22216 | Excalibur_c13115_348    | 5.4   |
| 6467 | 6A | 72905 | IWB72905 | Tdurum_contig62593_410  | 5.4   |
| 6468 | 6A | 2886  | IWB2886  | BobWhite_c3714_659      | 5.4   |
| 6469 | 6A | 65436 | IWB65436 | TA001680-1191           | 5.7   |
| 6470 | 6A | 65474 | IWB65474 | TA001907-0759           | 7.4   |
| 6471 | 6A | 7330  | IWB7330  | BS00022938_51           | 7.4   |
| 6472 | 6A | 63694 | IWB63694 | RFL_Contig1622_1259     | 7.4   |
| 6473 | 6A | 9357  | IWB9357  | BS00064730_51           | 7.4   |
| 6474 | 6A | 80459 | IWA6999  | wsnp_Ku_c38982_47513233 | 7.4   |
| 6475 | 6A | 80676 | IWA7288  | wsnp_Ku_c7471_12865509  | 7.4   |



|      |    |       |          |                             |      |
|------|----|-------|----------|-----------------------------|------|
| 6476 | 6A | 76511 | IWA1749  | wsnp_Ex_c13230_20872924     | 7.4  |
| 6477 | 6A | 63698 | IWB63698 | RFL_Contig1622_923          | 7.4  |
| 6478 | 6A | 36275 | IWB36275 | IACX8154                    | 8.3  |
| 6479 | 6A | 9898  | IWB9898  | BS00066872_51               | 8.3  |
| 6480 | 6A | 41245 | IWB41245 | Kukri_c14679_1082           | 11.6 |
| 6481 | 6A | 49468 | IWB49468 | Kukri_rep_c110681_178       | 11.8 |
| 6482 | 6A | 80838 | IWA7502  | wsnp_Ku_rep_c71785_71517370 | 11.8 |
| 6483 | 6A | 81343 | IWA8208  | wsnp_Ra_rep_c79566_75592262 | 11.8 |
| 6484 | 6A | 30287 | IWB30287 | Excalibur_rep_c107698_85    | 11.8 |
| 6485 | 6A | 10743 | IWB10743 | BS00074487_51               | 11.8 |
| 6486 | 6A | 29014 | IWB29014 | Excalibur_c8197_381         | 15.7 |
| 6487 | 6A | 28198 | IWB28198 | Excalibur_c63353_363        | 15.7 |
| 6488 | 6A | 28199 | IWB28199 | Excalibur_c63353_712        | 15.7 |
| 6489 | 6A | 20823 | IWB20823 | Ex_c49131_219               | 15.7 |
| 6490 | 6A | 8780  | IWB8780  | BS00059475_51               | 15.7 |
| 6491 | 6A | 28201 | IWB28201 | Excalibur_c63353_965        | 15.7 |
| 6492 | 6A | 29624 | IWB29624 | Excalibur_c9835_91          | 15.7 |
| 6493 | 6A | 33749 | IWB33749 | GENE-4050_396               | 15.7 |
| 6494 | 6A | 6440  | IWB6440  | BS00011591_51               | 15.7 |
| 6495 | 6A | 10775 | IWB10775 | BS00074991_51               | 15.7 |
| 6496 | 6A | 28559 | IWB28559 | Excalibur_c7044_243         | 15.7 |
| 6497 | 6A | 55352 | IWB55352 | RAC875_c2253_1255           | 15.7 |
| 6498 | 6A | 55849 | IWB55849 | RAC875_c25800_836           | 15.7 |
| 6499 | 6A | 40335 | IWB40335 | Kukri_c10377_88             | 15.7 |
| 6500 | 6A | 73285 | IWB73285 | Tdurum_contig75595_1072     | 15.7 |
| 6501 | 6A | 33750 | IWB33750 | GENE-4050_57                | 15.7 |
| 6502 | 6A | 55355 | IWB55355 | RAC875_c2253_238            | 15.7 |
| 6503 | 6A | 66600 | IWB66600 | Tdurum_contig10572_201      | 15.7 |
| 6504 | 6A | 71485 | IWB71485 | Tdurum_contig44092_939      | 15.7 |
| 6505 | 6A | 73288 | IWB73288 | Tdurum_contig75595_886      | 15.7 |
| 6506 | 6A | 43021 | IWB43021 | Kukri_c24705_248            | 15.7 |
| 6507 | 6A | 553   | IWB553   | BobWhite_c13839_78          | 15.7 |
| 6508 | 6A | 11433 | IWB11433 | BS00085980_51               | 15.7 |
| 6509 | 6A | 75134 | IWB75134 | tplb0057e06_1607            | 15.7 |
| 6510 | 6A | 80002 | IWA6390  | wsnp_Ku_c10377_17181816     | 15.7 |
| 6511 | 6A | 10776 | IWB10776 | BS00074992_51               | 15.7 |
| 6512 | 6A | 10958 | IWB10958 | BS00077789_51               | 15.7 |
| 6513 | 6A | 67933 | IWB67933 | Tdurum_contig13287_203      | 15.7 |
| 6514 | 6A | 75264 | IWB75264 | tplb0060j17_879             | 15.7 |
| 6515 | 6A | 1211  | IWB1211  | BobWhite_c18721_190         | 15.7 |
| 6516 | 6A | 77553 | IWA3137  | wsnp_Ex_c280_541960         | 15.7 |
| 6517 | 6A | 7337  | IWB7337  | BS00022951_51               | 15.7 |
| 6518 | 6A | 73286 | IWB73286 | Tdurum_contig75595_586      | 15.7 |
| 6519 | 6A | 51478 | IWB51478 | Ra_c2253_1271               | 15.7 |
| 6520 | 6A | 80177 | IWA6630  | wsnp_Ku_c17618_26749729     | 15.7 |
| 6521 | 6A | 552   | IWB552   | BobWhite_c13839_135         | 15.7 |
| 6522 | 6A | 78983 | IWA4961  | wsnp_Ex_c9763_16125630      | 15.7 |
| 6523 | 6A | 36242 | IWB36242 | IACX7801                    | 15.7 |
| 6524 | 6A | 55353 | IWB55353 | RAC875_c2253_1756           | 15.7 |
| 6525 | 6A | 36543 | IWB36543 | Jagger_c3477_441            | 15.7 |
| 6526 | 6A | 71874 | IWB71874 | Tdurum_contig48179_1197     | 15.7 |
| 6527 | 6A | 6044  | IWB6044  | BS00009331_51               | 15.7 |
| 6528 | 6A | 81575 | IWA8608  | wsnp_RFL_Contig4601_5473822 | 15.7 |
| 6529 | 6A | 73287 | IWB73287 | Tdurum_contig75595_643      | 15.7 |

|      |    |       |          |                             |      |
|------|----|-------|----------|-----------------------------|------|
| 6530 | 6A | 67935 | IWB67935 | Tdurum_contig13287_703      | 15.7 |
| 6531 | 6A | 53462 | IWB53462 | RAC875_c12015_576           | 15.7 |
| 6532 | 6A | 45189 | IWB45189 | Kukri_c42078_708            | 15.7 |
| 6533 | 6A | 44959 | IWB44959 | Kukri_c3986_346             | 15.7 |
| 6534 | 6A | 41785 | IWB41785 | Kukri_c17618_874            | 15.7 |
| 6535 | 6A | 40703 | IWB40703 | Kukri_c1192_825             | 15.7 |
| 6536 | 6A | 40333 | IWB40333 | Kukri_c10377_3453           | 15.7 |
| 6537 | 6A | 26040 | IWB26040 | Excalibur_c39390_303        | 15.7 |
| 6538 | 6A | 76510 | IWA1748  | wsnp_Ex_c13223_20866191     | 15.7 |
| 6539 | 6A | 66606 | IWB66606 | Tdurum_contig10572_840      | 15.7 |
| 6540 | 6A | 44659 | IWB44659 | Kukri_c37241_513            | 15.7 |
| 6541 | 6A | 36255 | IWB36255 | IACX7895                    | 15.7 |
| 6542 | 6A | 33864 | IWB33864 | GENE-4235_196               | 15.7 |
| 6543 | 6A | 29622 | IWB29622 | Excalibur_c98315_309        | 15.7 |
| 6544 | 6A | 27480 | IWB27480 | Excalibur_c5442_1691        | 15.7 |
| 6545 | 6A | 22233 | IWB22233 | Excalibur_c13223_117        | 15.7 |
| 6546 | 6A | 11955 | IWB11955 | BS00096301_51               | 15.7 |
| 6547 | 6A | 6401  | IWB6401  | BS00011436_51               | 15.7 |
| 6548 | 6A | 54076 | IWB54076 | RAC875_c15233_366           | 15.7 |
| 6549 | 6A | 40518 | IWB40518 | Kukri_c11106_292            | 16.2 |
| 6550 | 6A | 24037 | IWB24037 | Excalibur_c23748_452        | 16.8 |
| 6551 | 6A | 72039 | IWB72039 | Tdurum_contig50062_934      | 18.1 |
| 6552 | 6A | 61585 | IWB61585 | RAC875_rep_c106371_205      | 18.1 |
| 6553 | 6A | 75794 | IWA647   | wsnp_CAP11_c1114_653767     | 20.7 |
| 6554 | 6A | 62193 | IWB62193 | RAC875_rep_c113205_124      | 20.7 |
| 6555 | 6A | 33735 | IWB33735 | GENE-4011_91                | 20.7 |
| 6556 | 6A | 14461 | IWB14461 | CAP7_rep_c8019_110          | 20.7 |
| 6557 | 6A | 61283 | IWB61283 | RAC875_c99286_60            | 20.7 |
| 6558 | 6A | 58955 | IWB58955 | RAC875_c53520_103           | 20.7 |
| 6559 | 6A | 22389 | IWB22389 | Excalibur_c14222_179        | 20.7 |
| 6560 | 6A | 11844 | IWB11844 | BS00093964_51               | 20.7 |
| 6561 | 6A | 25592 | IWB25592 | Excalibur_c35324_183        | 20.7 |
| 6562 | 6A | 12491 | IWB12491 | BS00110201_51               | 20.7 |
| 6563 | 6A | 67079 | IWB67079 | Tdurum_contig11414_478      | 20.7 |
| 6564 | 6A | 71930 | IWB71930 | Tdurum_contig4885_1870      | 20.7 |
| 6565 | 6A | 73937 | IWB73937 | Tdurum_contig9544_2233      | 30.8 |
| 6566 | 6A | 39835 | IWB39835 | Ku_c68790_566               | 30.8 |
| 6567 | 6A | 66392 | IWB66392 | Tdurum_contig102404_127     | 30.8 |
| 6568 | 6A | 72866 | IWB72866 | Tdurum_contig62141_148      | 30.8 |
| 6569 | 6A | 56969 | IWB56969 | RAC875_c34617_143           | 30.8 |
| 6570 | 6A | 79337 | IWA5401  | wsnp_Ex_rep_c67468_66068960 | 30.8 |
| 6571 | 6A | 73939 | IWB73939 | Tdurum_contig9544_978       | 30.8 |
| 6572 | 6A | 72868 | IWB72868 | Tdurum_contig62141_496      | 30.8 |
| 6573 | 6A | 71378 | IWB71378 | Tdurum_contig42906_732      | 30.8 |
| 6574 | 6A | 39323 | IWB39323 | Ku_c37893_495               | 30.8 |
| 6575 | 6A | 24278 | IWB24278 | Excalibur_c25211_828        | 30.8 |
| 6576 | 6A | 66393 | IWB66393 | Tdurum_contig102404_298     | 30.8 |
| 6577 | 6A | 35338 | IWB35338 | IAAV7418                    | 30.8 |
| 6578 | 6A | 73938 | IWB73938 | Tdurum_contig9544_675       | 30.8 |
| 6579 | 6A | 65434 | IWB65434 | TA001668-0792               | 30.8 |
| 6580 | 6A | 14403 | IWB14403 | CAP7_rep_c13246_103         | 30.8 |
| 6581 | 6A | 10887 | IWB10887 | BS00076530_51               | 30.8 |
| 6582 | 6A | 79338 | IWA5402  | wsnp_Ex_rep_c67468_66069282 | 30.8 |
| 6583 | 6A | 77702 | IWA3322  | wsnp_Ex_c31149_39976103     | 30.8 |

|      |    |       |          |                              |      |
|------|----|-------|----------|------------------------------|------|
| 6584 | 6A | 72867 | IWB72867 | Tdurum_contig62141_295       | 30.8 |
| 6585 | 6A | 44471 | IWB44471 | Kukri_c35661_63              | 30.8 |
| 6586 | 6A | 32525 | IWB32525 | GENE-1530_594                | 30.8 |
| 6587 | 6A | 73265 | IWB73265 | Tdurum_contig75292_933       | 30.8 |
| 6588 | 6A | 65923 | IWB65923 | TA005058-0493                | 30.8 |
| 6589 | 6A | 32524 | IWB32524 | GENE-1530_548                | 30.8 |
| 6590 | 6A | 32523 | IWB32523 | GENE-1530_263                | 30.8 |
| 6591 | 6A | 7442  | IWB7442  | BS00023140_51                | 30.8 |
| 6592 | 6A | 56842 | IWB56842 | RAC875_c33488_549            | 31.9 |
| 6593 | 6A | 12244 | IWB12244 | BS00105466_51                | 34.8 |
| 6594 | 6A | 62874 | IWB62874 | RAC875_rep_c72457_638        | 34.8 |
| 6595 | 6A | 69994 | IWB69994 | Tdurum_contig30286_549       | 34.8 |
| 6596 | 6A | 63050 | IWB63050 | RAC875_rep_c75189_110        | 34.8 |
| 6597 | 6A | 40829 | IWB40829 | Kukri_c12478_628             | 34.8 |
| 6598 | 6A | 48600 | IWB48600 | Kukri_rep_c101121_477        | 34.8 |
| 6599 | 6A | 7500  | IWB7500  | BS00023627_51                | 35.0 |
| 6600 | 6A | 76723 | IWA2018  | wsnp_Ex_c15378_23639387      | 37.3 |
| 6601 | 6A | 76722 | IWA2017  | wsnp_Ex_c15378_23638822      | 37.3 |
| 6602 | 6A | 13025 | IWB13025 | CAP11_c6962_208              | 42.0 |
| 6603 | 6A | 9036  | IWB9036  | BS00063296_51                | 42.0 |
| 6604 | 6A | 10644 | IWB10644 | BS00073124_51                | 42.3 |
| 6605 | 6A | 26966 | IWB26966 | Excalibur_c48569_78          | 42.5 |
| 6606 | 6A | 56139 | IWB56139 | RAC875_c27962_61             | 42.5 |
| 6607 | 6A | 35011 | IWB35011 | IAAV5346                     | 43.7 |
| 6608 | 6A | 9804  | IWB9804  | BS00066438_51                | 43.7 |
| 6609 | 6A | 10605 | IWB10605 | BS00072286_51                | 43.7 |
| 6610 | 6A | 6447  | IWB6447  | BS00011607_51                | 43.7 |
| 6611 | 6A | 58234 | IWB58234 | RAC875_c4632_934             | 43.7 |
| 6612 | 6A | 63546 | IWB63546 | RFL_Contig1038_942           | 43.7 |
| 6613 | 6A | 77419 | IWA2960  | wsnp_Ex_c25300_34566908      | 43.7 |
| 6614 | 6A | 61658 | IWB61658 | RAC875_rep_c107081_918       | 43.7 |
| 6615 | 6A | 77232 | IWA2687  | wsnp_Ex_c22089_31270755      | 43.7 |
| 6616 | 6A | 80194 | IWA6654  | wsnp_Ku_c18534_27848426      | 43.7 |
| 6617 | 6A | 62950 | IWB62950 | RAC875_rep_c73318_362        | 43.7 |
| 6618 | 6A | 58233 | IWB58233 | RAC875_c4632_1681            | 43.7 |
| 6619 | 6A | 10234 | IWB10234 | BS00068106_51                | 43.7 |
| 6620 | 6A | 7221  | IWB7221  | BS00022704_51                | 43.7 |
| 6621 | 6A | 56677 | IWB56677 | RAC875_c31973_225            | 43.7 |
| 6622 | 6A | 78437 | IWA4262  | wsnp_Ex_c55340_57883276      | 43.7 |
| 6623 | 6A | 40867 | IWB40867 | Kukri_c12641_1185            | 43.7 |
| 6624 | 6A | 33609 | IWB33609 | GENE-3798_1143               | 43.7 |
| 6625 | 6A | 78438 | IWA4263  | wsnp_Ex_c55340_57883479      | 43.7 |
| 6626 | 6A | 27978 | IWB27978 | Excalibur_c6057_281          | 43.7 |
| 6627 | 6A | 3322  | IWB3322  | BobWhite_c43699_393          | 43.7 |
| 6628 | 6A | 75953 | IWA902   | wsnp_CAP11_rep_c8811_3803397 | 43.7 |
| 6629 | 6A | 65836 | IWB65836 | TA004440-0664                | 43.7 |
| 6630 | 6A | 13914 | IWB13914 | CAP7_c2381_149               | 43.7 |
| 6631 | 6A | 13089 | IWB13089 | CAP11_c989_113               | 43.7 |
| 6632 | 6A | 77773 | IWA3412  | wsnp_Ex_c32765_41369642      | 43.7 |
| 6633 | 6A | 20150 | IWB20150 | Ex_c22089_1077               | 43.7 |
| 6634 | 6A | 13069 | IWB13069 | CAP11_c862_116               | 43.7 |
| 6635 | 6A | 11680 | IWB11680 | BS00090928_51                | 43.7 |
| 6636 | 6A | 6851  | IWB6851  | BS00021999_51                | 43.7 |
| 6637 | 6A | 80734 | IWA7362  | wsnp_Ku_c9583_16038698       | 43.7 |

|      |    |       |          |                             |      |
|------|----|-------|----------|-----------------------------|------|
| 6638 | 6A | 79475 | IWA5589  | wsnp_Ex_rep_c69191_68104835 | 43.7 |
| 6639 | 6A | 77233 | IWA2688  | wsnp_Ex_c22089_31270950     | 43.7 |
| 6640 | 6A | 77230 | IWA2685  | wsnp_Ex_c22089_31269531     | 43.7 |
| 6641 | 6A | 65945 | IWB65945 | TA005243-1174               | 43.7 |
| 6642 | 6A | 59901 | IWB59901 | RAC875_c64852_655           | 43.7 |
| 6643 | 6A | 42573 | IWB42573 | Kukri_c21943_466            | 43.7 |
| 6644 | 6A | 14307 | IWB14307 | CAP7_c900_114               | 43.7 |
| 6645 | 6A | 9647  | IWB9647  | BS00065852_51               | 43.7 |
| 6646 | 6A | 10097 | IWB10097 | BS00067618_51               | 43.9 |
| 6647 | 6A | 26570 | IWB26570 | Excalibur_c44694_414        | 43.9 |
| 6648 | 6A | 38287 | IWB38287 | Ku_c11950_931               | 43.9 |
| 6649 | 6A | 38469 | IWB38469 | Ku_c14907_456               | 43.9 |
| 6650 | 6A | 78809 | IWA4739  | wsnp_Ex_c7876_13389437      | 43.9 |
| 6651 | 6A | 80640 | IWA7237  | wsnp_Ku_c67_136981          | 43.9 |
| 6652 | 6A | 854   | IWB854   | BobWhite_c15977_107         | 43.9 |
| 6653 | 6A | 6293  | IWB6293  | BS00010811_51               | 43.9 |
| 6654 | 6A | 24955 | IWB24955 | Excalibur_c30324_564        | 43.9 |
| 6655 | 6A | 34596 | IWB34596 | IAAV2681                    | 43.9 |
| 6656 | 6A | 51699 | IWB51699 | Ra_c28284_223               | 43.9 |
| 6657 | 6A | 76681 | IWA1962  | wsnp_Ex_c14975_23127669     | 43.9 |
| 6658 | 6A | 77399 | IWA2936  | wsnp_Ex_c24958_34212226     | 43.9 |
| 6659 | 6A | 78000 | IWA3700  | wsnp_Ex_c3997_7238372       | 43.9 |
| 6660 | 6A | 47355 | IWB47355 | Kukri_c67_1504              | 43.9 |
| 6661 | 6A | 77835 | IWA3495  | wsnp_Ex_c3472_6358437       | 43.9 |
| 6662 | 6A | 75685 | IWA508   | wsnp_BF483993A_Ta_2_1       | 43.9 |
| 6663 | 6A | 77977 | IWA3670  | wsnp_Ex_c3913_7100986       | 43.9 |
| 6664 | 6A | 6225  | IWB6225  | BS00010441_51               | 43.9 |
| 6665 | 6A | 34343 | IWB34343 | IAAV1234                    | 43.9 |
| 6666 | 6A | 40185 | IWB40185 | Ku_c97015_209               | 43.9 |
| 6667 | 6A | 78127 | IWA3866  | wsnp_Ex_c43412_49738738     | 43.9 |
| 6668 | 6A | 78808 | IWA4738  | wsnp_Ex_c7876_13389283      | 43.9 |
| 6669 | 6A | 8442  | IWB8442  | BS00046964_51               | 43.9 |
| 6670 | 6A | 78996 | IWA4979  | wsnp_Ex_c99215_85409445     | 43.9 |
| 6671 | 6A | 34985 | IWB34985 | IAAV5188                    | 43.9 |
| 6672 | 6A | 10098 | IWB10098 | BS00067619_51               | 43.9 |
| 6673 | 6A | 72208 | IWB72208 | Tdurum_contig51717_1582     | 43.9 |
| 6674 | 6A | 34654 | IWB34654 | IAAV3046                    | 43.9 |
| 6675 | 6A | 80449 | IWA6986  | wsnp_Ku_c38451_47086066     | 48.3 |
| 6676 | 6A | 26244 | IWB26244 | Excalibur_c4152_1031        | 48.3 |
| 6677 | 6A | 24032 | IWB24032 | Excalibur_c23740_225        | 48.5 |
| 6678 | 6A | 60499 | IWB60499 | RAC875_c7804_236            | 48.8 |
| 6679 | 6A | 73396 | IWB73396 | Tdurum_contig76709_195      | 49.9 |
| 6680 | 6A | 7421  | IWB7421  | BS00023092_51               | 49.9 |
| 6681 | 6A | 27650 | IWB27650 | Excalibur_c56264_188        | 49.9 |
| 6682 | 6A | 6691  | IWB6691  | BS00021376_51               | 49.9 |
| 6683 | 6A | 31234 | IWB31234 | Excalibur_rep_c74709_56     | 51.3 |
| 6684 | 6A | 67403 | IWB67403 | Tdurum_contig12033_275      | 51.3 |
| 6685 | 6A | 73642 | IWB73642 | Tdurum_contig83570_288      | 51.3 |
| 6686 | 6A | 30925 | IWB30925 | Excalibur_rep_c68125_1097   | 51.6 |
| 6687 | 6A | 52504 | IWB52504 | Ra_c70188_270               | 51.8 |
| 6688 | 6A | 33830 | IWB33830 | GENE-4200_87                | 51.8 |
| 6689 | 6A | 36012 | IWB36012 | IACX5753                    | 51.8 |
| 6690 | 6A | 10186 | IWB10186 | BS00067934_51               | 51.8 |
| 6691 | 6A | 9763  | IWB9763  | BS00066274_51               | 51.8 |

|      |    |       |          |                              |      |
|------|----|-------|----------|------------------------------|------|
| 6692 | 6A | 8206  | IWB8206  | BS00040124_51                | 51.8 |
| 6693 | 6A | 63294 | IWB63294 | RAC875_rep_c91575_101        | 51.8 |
| 6694 | 6A | 62830 | IWB62830 | RAC875_rep_c72029_380        | 51.8 |
| 6695 | 6A | 36195 | IWB36195 | IACX7439                     | 51.8 |
| 6696 | 6A | 5848  | IWB5848  | BS00003616_51                | 51.8 |
| 6697 | 6A | 6191  | IWB6191  | BS00010221_51                | 51.8 |
| 6698 | 6A | 34964 | IWB34964 | IAAV5035                     | 52.4 |
| 6699 | 6A | 79783 | IWA6033  | wsnp_JD_c3839_4902725        | 52.4 |
| 6700 | 6A | 78894 | IWA4842  | wsnp_Ex_c8741_14630167       | 52.4 |
| 6701 | 6A | 60379 | IWB60379 | RAC875_c7560_398             | 52.4 |
| 6702 | 6A | 75956 | IWA911   | wsnp_CAP12_c1226_628910      | 52.4 |
| 6703 | 6A | 6511  | IWB6511  | BS00012028_51                | 52.6 |
| 6704 | 6A | 76443 | IWA1671  | wsnp_Ex_c1269_2435294        | 53.2 |
| 6705 | 6A | 36794 | IWB36794 | Jagger_c8913_220             | 53.2 |
| 6706 | 6A | 51205 | IWB51205 | Ra_c16143_1157               | 53.2 |
| 6707 | 6A | 10995 | IWB10995 | BS00078213_51                | 53.2 |
| 6708 | 6A | 34914 | IWB34914 | IAAV4703                     | 53.2 |
| 6709 | 6A | 10600 | IWB10600 | BS00072216_51                | 53.2 |
| 6710 | 6A | 110   | IWB110   | BobWhite_c1082_134           | 53.2 |
| 6711 | 6A | 1314  | IWB1314  | BobWhite_c19820_129          | 53.2 |
| 6712 | 6A | 80157 | IWA6596  | wsnp_Ku_c16432_25320146      | 53.2 |
| 6713 | 6A | 79072 | IWA5074  | wsnp_Ex_rep_c102807_87894833 | 53.2 |
| 6714 | 6A | 47270 | IWB47270 | Kukri_c65887_282             | 54.0 |
| 6715 | 6A | 5338  | IWB5338  | BobWhite_rep_c63152_444      | 54.0 |
| 6716 | 6A | 75106 | IWB75106 | tplb0056d17_78               | 54.0 |
| 6717 | 6A | 75144 | IWB75144 | tplb0057g20_780              | 54.3 |
| 6718 | 6A | 42205 | IWB42205 | Kukri_c19802_710             | 54.3 |
| 6719 | 6A | 50266 | IWB50266 | Kukri_rep_c73457_419         | 54.3 |
| 6720 | 6A | 13180 | IWB13180 | CAP12_c118_95                | 54.3 |
| 6721 | 6A | 24701 | IWB24701 | Excalibur_c2834_397          | 54.3 |
| 6722 | 6A | 61092 | IWB61092 | RAC875_c93959_96             | 89.0 |
| 6723 | 6A | 69770 | IWB69770 | Tdurum_contig29357_338       | 89.0 |
| 6724 | 6A | 64875 | IWB64875 | RFL_Contig5037_560           | 89.0 |
| 6725 | 6A | 71441 | IWB71441 | Tdurum_contig43566_801       | 89.0 |
| 6726 | 6A | 6825  | IWB6825  | BS00021965_51                | 89.5 |
| 6727 | 6A | 24870 | IWB24870 | Excalibur_c29639_65          | 89.5 |
| 6728 | 6A | 27303 | IWB27303 | Excalibur_c52196_235         | 89.5 |
| 6729 | 6A | 50538 | IWB50538 | Kukri_rep_c95718_868         | 94.8 |
| 6730 | 6A | 63000 | IWB63000 | RAC875_rep_c74051_276        | 94.8 |
| 6731 | 6A | 12203 | IWB12203 | BS00103442_51                | 94.8 |
| 6732 | 6A | 69637 | IWB69637 | Tdurum_contig28802_213       | 94.8 |
| 6733 | 6A | 65198 | IWB65198 | RFL_Contig6053_3082          | 94.8 |
| 6734 | 6A | 77830 | IWA3488  | wsnp_Ex_c34597_42879718      | 94.8 |
| 6735 | 6A | 77829 | IWA3487  | wsnp_Ex_c34597_42879693      | 94.8 |
| 6736 | 6A | 7048  | IWB7048  | BS00022372_51                | 95.4 |
| 6737 | 6A | 28546 | IWB28546 | Excalibur_c7002_314          | 97.1 |
| 6738 | 6A | 79839 | IWA6117  | wsnp_JD_c5872_7032403        | 97.1 |
| 6739 | 6A | 75682 | IWA504   | wsnp_BF483091A_Ta_2_5        | 97.1 |
| 6740 | 6A | 4014  | IWB4014  | BobWhite_c5872_589           | 97.1 |
| 6741 | 6A | 12266 | IWB12266 | BS00105965_51                | 97.1 |
| 6742 | 6A | 35343 | IWB35343 | IAAV7452                     | 97.1 |
| 6743 | 6A | 80892 | IWA7572  | wsnp_Ra_c11651_18855691      | 97.1 |
| 6744 | 6A | 37899 | IWB37899 | JD_c9656_680                 | 97.3 |
| 6745 | 6A | 29501 | IWB29501 | Excalibur_c95213_449         | 97.6 |

|      |    |       |          |                              |      |
|------|----|-------|----------|------------------------------|------|
| 6746 | 6A | 34813 | IWB34813 | IAAV40                       | 97.9 |
| 6747 | 6A | 24946 | IWB24946 | Excalibur_c30234_130         | 97.9 |
| 6748 | 6A | 34392 | IWB34392 | IAAV1495                     | 97.9 |
| 6749 | 6A | 4933  | IWB4933  | BobWhite_rep_c51132_85       | 97.9 |
| 6750 | 6A | 2747  | IWB2747  | BobWhite_c35035_85           | 97.9 |
| 6751 | 6A | 71119 | IWB71119 | Tdurum_contig42418_1811      | 97.9 |
| 6752 | 6A | 64260 | IWB64260 | RFL_Contig3175_749           | 97.9 |
| 6753 | 6A | 64259 | IWB64259 | RFL_Contig3175_482           | 97.9 |
| 6754 | 6A | 64255 | IWB64255 | RFL_Contig3175_1217          | 97.9 |
| 6755 | 6A | 35265 | IWB35265 | IAAV6895                     | 97.9 |
| 6756 | 6A | 81481 | IWA8438  | wsnp_RFL_Contig3175_3154256  | 97.9 |
| 6757 | 6A | 81448 | IWA8386  | wsnp_RFL_Contig2765_2513854  | 97.9 |
| 6758 | 6A | 71973 | IWB71973 | Tdurum_contig49511_330       | 97.9 |
| 6759 | 6A | 29913 | IWB29913 | Excalibur_rep_c103170_504    | 97.9 |
| 6760 | 6A | 28231 | IWB28231 | Excalibur_c63713_892         | 97.9 |
| 6761 | 6A | 28230 | IWB28230 | Excalibur_c63713_871         | 97.9 |
| 6762 | 6A | 11675 | IWB11675 | BS00090829_51                | 97.9 |
| 6763 | 6A | 11554 | IWB11554 | BS00088274_51                | 97.9 |
| 6764 | 6A | 75963 | IWA928   | wsnp_CAP12_c1663_836753      | 97.9 |
| 6765 | 6A | 64047 | IWB64047 | RFL_Contig2765_669           | 97.9 |
| 6766 | 6A | 75641 | IWA441   | wsnp_BF291974A_Ta_2_1        | 98.2 |
| 6767 | 6A | 75996 | IWA1000  | wsnp_CAP12_rep_c4048_1842112 | 98.2 |
| 6768 | 6A | 7970  | IWB7970  | BS00034337_51                | 98.5 |
| 6769 | 6A | 8819  | IWB8819  | BS00060796_51                | 98.7 |
| 6770 | 6A | 60883 | IWB60883 | RAC875_c8721_212             | 99.3 |
| 6771 | 6A | 8631  | IWB8631  | BS00053588_51                | 99.3 |
| 6772 | 6A | 30812 | IWB30812 | Excalibur_rep_c67100_635     | 99.3 |
| 6773 | 6A | 46593 | IWB46593 | Kukri_c5631_770              | 99.3 |
| 6774 | 6A | 3130  | IWB3130  | BobWhite_c40602_313          | 99.3 |
| 6775 | 6A | 36427 | IWB36427 | Jagger_c1134_353             | 99.3 |
| 6776 | 6A | 77601 | IWA3202  | wsnp_Ex_c28973_38050174      | 99.3 |
| 6777 | 6A | 34434 | IWB34434 | IAAV173                      | 99.3 |
| 6778 | 6A | 47486 | IWB47486 | Kukri_c6972_240              | 99.3 |
| 6779 | 6A | 48235 | IWB48235 | Kukri_c90942_274             | 99.3 |
| 6780 | 6A | 42057 | IWB42057 | Kukri_c18955_73              | 99.3 |
| 6781 | 6A | 46592 | IWB46592 | Kukri_c5631_1514             | 99.3 |
| 6782 | 6A | 53433 | IWB53433 | RAC875_c11876_120            | 99.3 |
| 6783 | 6A | 77193 | IWA2639  | wsnp_Ex_c21688_30847181      | 99.3 |
| 6784 | 6A | 65928 | IWB65928 | TA005098-0959                | 99.3 |
| 6785 | 6A | 50    | IWB50    | BobWhite_c10343_320          | 99.3 |
| 6786 | 6A | 45148 | IWB45148 | Kukri_c41482_311             | 99.3 |
| 6787 | 6A | 8718  | IWB8718  | BS00057486_51                | 99.3 |
| 6788 | 6A | 31394 | IWB31394 | Excalibur_rep_c90454_251     | 99.3 |
| 6789 | 6A | 77153 | IWA2580  | wsnp_Ex_c21129_30256617      | 99.3 |
| 6790 | 6A | 8923  | IWB8923  | BS00062776_51                | 99.3 |
| 6791 | 6A | 70657 | IWB70657 | Tdurum_contig413_220         | 99.3 |
| 6792 | 6A | 36618 | IWB36618 | Jagger_c5046_63              | 99.3 |
| 6793 | 6A | 69846 | IWB69846 | Tdurum_contig29607_413       | 99.3 |
| 6794 | 6A | 74002 | IWB74002 | Tdurum_contig97520_902       | 99.3 |
| 6795 | 6A | 31025 | IWB31025 | Excalibur_rep_c69054_960     | 99.3 |
| 6796 | 6A | 53748 | IWB53748 | RAC875_c13595_669            | 99.3 |
| 6797 | 6A | 75607 | IWA400   | wsnp_BE636872A_Ta_2_6        | 99.3 |
| 6798 | 6A | 58370 | IWB58370 | RAC875_c47588_250            | 99.3 |
| 6799 | 6A | 80753 | IWA7386  | wsnp_Ku_rep_c102077_89125383 | 99.3 |

|      |    |       |          |                             |       |
|------|----|-------|----------|-----------------------------|-------|
| 6800 | 6A | 27507 | IWB27507 | Excalibur_c54765_156        | 99.3  |
| 6801 | 6A | 48492 | IWB48492 | Kukri_c9805_696             | 99.3  |
| 6802 | 6A | 76318 | IWA1510  | wsnp_Ex_c1153_2213588       | 99.3  |
| 6803 | 6A | 81122 | IWA7894  | wsnp_Ra_c36410_44760538     | 99.3  |
| 6804 | 6A | 8248  | IWB8248  | BS00040814_51               | 99.3  |
| 6805 | 6A | 21174 | IWB21174 | Ex_c69054_723               | 99.3  |
| 6806 | 6A | 66989 | IWB66989 | Tdurum_contig11275_461      | 99.3  |
| 6807 | 6A | 77500 | IWA3066  | wsnp_Ex_c26771_35998435     | 99.3  |
| 6808 | 6A | 8423  | IWB8423  | BS00046261_51               | 99.3  |
| 6809 | 6A | 60590 | IWB60590 | RAC875_c79898_255           | 99.3  |
| 6810 | 6A | 35122 | IWB35122 | IAAV5969                    | 99.3  |
| 6811 | 6A | 56108 | IWB56108 | RAC875_c27781_591           | 99.3  |
| 6812 | 6A | 33839 | IWB33839 | GENE-4208_788               | 99.3  |
| 6813 | 6A | 72197 | IWB72197 | Tdurum_contig51627_1211     | 99.3  |
| 6814 | 6A | 74304 | IWB74304 | tplb0026o20_691             | 99.3  |
| 6815 | 6A | 29924 | IWB29924 | Excalibur_rep_c103232_355   | 99.3  |
| 6816 | 6A | 75006 | IWB75006 | tplb0052j03_499             | 99.3  |
| 6817 | 6A | 35994 | IWB35994 | IACX5481                    | 99.3  |
| 6818 | 6A | 79968 | IWA6316  | wsnp_JD_rep_c65886_41872083 | 99.3  |
| 6819 | 6A | 80115 | IWA6537  | wsnp_Ku_c1468_2912654       | 99.3  |
| 6820 | 6A | 33662 | IWB33662 | GENE-3911_120               | 99.3  |
| 6821 | 6A | 59857 | IWB59857 | RAC875_c6429_55             | 99.6  |
| 6822 | 6A | 68646 | IWB68646 | Tdurum_contig17378_299      | 99.6  |
| 6823 | 6A | 51469 | IWB51469 | Ra_c2235_1339               | 99.8  |
| 6824 | 6A | 3554  | IWB3554  | BobWhite_c47040_305         | 100.4 |
| 6825 | 6A | 8389  | IWB8389  | BS00045156_51               | 100.7 |
| 6826 | 6A | 57517 | IWB57517 | RAC875_c39433_564           | 100.7 |
| 6827 | 6A | 60184 | IWB60184 | RAC875_c685_120             | 100.7 |
| 6828 | 6A | 60185 | IWB60185 | RAC875_c685_1246            | 100.7 |
| 6829 | 6A | 80920 | IWA7621  | wsnp_Ra_c13998_21994095     | 100.7 |
| 6830 | 6A | 55490 | IWB55490 | RAC875_c23338_792           | 100.7 |
| 6831 | 6A | 13936 | IWB13936 | CAP7_c2559_63               | 100.7 |
| 6832 | 6A | 11258 | IWB11258 | BS00082460_51               | 100.7 |
| 6833 | 6A | 50130 | IWB50130 | Kukri_rep_c71567_475        | 100.7 |
| 6834 | 6A | 76603 | IWA1866  | wsnp_Ex_c14156_22088518     | 100.7 |
| 6835 | 6A | 80833 | IWA7497  | wsnp_Ku_rep_c71567_71302229 | 100.7 |
| 6836 | 6A | 34589 | IWB34589 | IAAV2636                    | 100.7 |
| 6837 | 6A | 45429 | IWB45429 | Kukri_c44291_138            | 100.7 |
| 6838 | 6A | 45431 | IWB45431 | Kukri_c44291_223            | 100.7 |
| 6839 | 6A | 44475 | IWB44475 | Kukri_c3570_1418            | 100.7 |
| 6840 | 6A | 57516 | IWB57516 | RAC875_c39433_285           | 100.7 |
| 6841 | 6A | 34398 | IWB34398 | IAAV1529                    | 100.7 |
| 6842 | 6A | 45106 | IWB45106 | Kukri_c41157_315            | 100.7 |
| 6843 | 6A | 11446 | IWB11446 | BS00086174_51               | 100.7 |
| 6844 | 6A | 44476 | IWB44476 | Kukri_c3570_1817            | 100.7 |
| 6845 | 6A | 77306 | IWA2795  | wsnp_Ex_c2325_4355706       | 100.7 |
| 6846 | 6A | 80832 | IWA7496  | wsnp_Ku_rep_c71567_71302046 | 100.7 |
| 6847 | 6A | 45430 | IWB45430 | Kukri_c44291_192            | 100.7 |
| 6848 | 6A | 71327 | IWB71327 | Tdurum_contig42643_335      | 100.7 |
| 6849 | 6A | 50129 | IWB50129 | Kukri_rep_c71567_1037       | 100.7 |
| 6850 | 6A | 25644 | IWB25644 | Excalibur_c35871_596        | 101.0 |
| 6851 | 6B | 76790 | IWA2098  | wsnp_Ex_c16090_24522660     | 0.0   |
| 6852 | 6B | 3282  | IWB3282  | BobWhite_c43135_397         | 0.3   |
| 6853 | 6B | 36361 | IWB36361 | IACX9205                    | 0.3   |

|      |    |       |          |                             |      |
|------|----|-------|----------|-----------------------------|------|
| 6854 | 6B | 56605 | IWB56605 | RAC875_c31381_820           | 0.3  |
| 6855 | 6B | 67725 | IWB67725 | Tdurum_contig12749_284      | 0.3  |
| 6856 | 6B | 25711 | IWB25711 | Excalibur_c36398_69         | 0.3  |
| 6857 | 6B | 59377 | IWB59377 | RAC875_c58425_286           | 1.1  |
| 6858 | 6B | 59378 | IWB59378 | RAC875_c58425_331           | 1.1  |
| 6859 | 6B | 63100 | IWB63100 | RAC875_rep_c77197_187       | 1.1  |
| 6860 | 6B | 80514 | IWA7070  | wsnp_Ku_c4446_8062906       | 1.1  |
| 6861 | 6B | 7673  | IWB7673  | BS00028088_51               | 1.1  |
| 6862 | 6B | 416   | IWB416   | BobWhite_c12846_389         | 1.7  |
| 6863 | 6B | 58009 | IWB58009 | RAC875_c44002_81            | 1.7  |
| 6864 | 6B | 81499 | IWA8477  | wsnp_RFL_Contig3512_3672726 | 1.7  |
| 6865 | 6B | 8673  | IWB8673  | BS00055768_51               | 3.1  |
| 6866 | 6B | 9057  | IWB9057  | BS00063429_51               | 3.1  |
| 6867 | 6B | 10964 | IWB10964 | BS00077844_51               | 3.1  |
| 6868 | 6B | 59649 | IWB59649 | RAC875_c61989_92            | 3.1  |
| 6869 | 6B | 8674  | IWB8674  | BS00055769_51               | 3.1  |
| 6870 | 6B | 70382 | IWB70382 | Tdurum_contig32779_217      | 3.3  |
| 6871 | 6B | 61429 | IWB61429 | RAC875_rep_c105224_352      | 3.9  |
| 6872 | 6B | 72322 | IWB72322 | Tdurum_contig53646_799      | 3.9  |
| 6873 | 6B | 28633 | IWB28633 | Excalibur_c72517_227        | 6.2  |
| 6874 | 6B | 74087 | IWB74087 | tplb0021d05_204             | 6.2  |
| 6875 | 6B | 13056 | IWB13056 | CAP11_c7959_386             | 6.2  |
| 6876 | 6B | 75959 | IWA921   | wsnp_CAP12_c1388_706924     | 6.2  |
| 6877 | 6B | 28262 | IWB28262 | Excalibur_c64119_345        | 6.2  |
| 6878 | 6B | 42821 | IWB42821 | Kukri_c23491_274            | 6.2  |
| 6879 | 6B | 76633 | IWA1901  | wsnp_Ex_c14481_22485922     | 13.7 |
| 6880 | 6B | 48833 | IWB48833 | Kukri_rep_c103034_636       | 13.7 |
| 6881 | 6B | 57422 | IWB57422 | RAC875_c38592_229           | 13.7 |
| 6882 | 6B | 30654 | IWB30654 | Excalibur_rep_c114123_366   | 13.7 |
| 6883 | 6B | 61523 | IWB61523 | RAC875_rep_c105906_124      | 13.7 |
| 6884 | 6B | 13906 | IWB13906 | CAP7_c2260_110              | 13.7 |
| 6885 | 6B | 28339 | IWB28339 | Excalibur_c64989_556        | 13.7 |
| 6886 | 6B | 44590 | IWB44590 | Kukri_c3664_1071            | 13.7 |
| 6887 | 6B | 23381 | IWB23381 | Excalibur_c19747_53         | 13.7 |
| 6888 | 6B | 43037 | IWB43037 | Kukri_c24795_267            | 13.7 |
| 6889 | 6B | 7119  | IWB7119  | BS00022499_51               | 13.7 |
| 6890 | 6B | 29457 | IWB29457 | Excalibur_c94362_397        | 13.7 |
| 6891 | 6B | 52739 | IWB52739 | Ra_c8396_465                | 13.7 |
| 6892 | 6B | 52738 | IWB52738 | Ra_c8396_464                | 13.7 |
| 6893 | 6B | 45870 | IWB45870 | Kukri_c48410_604            | 13.7 |
| 6894 | 6B | 79723 | IWA5943  | wsnp_JD_c23373_19987039     | 13.7 |
| 6895 | 6B | 78705 | IWA4612  | wsnp_Ex_c702_1383612        | 13.7 |
| 6896 | 6B | 48831 | IWB48831 | Kukri_rep_c103009_826       | 13.7 |
| 6897 | 6B | 81083 | IWA7841  | wsnp_Ra_c30621_39857295     | 13.7 |
| 6898 | 6B | 61321 | IWB61321 | RAC875_rep_c101299_88       | 13.7 |
| 6899 | 6B | 57334 | IWB57334 | RAC875_c37759_711           | 13.7 |
| 6900 | 6B | 7937  | IWB7937  | BS00033642_51               | 18.2 |
| 6901 | 6B | 73576 | IWB73576 | Tdurum_contig82504_154      | 19.3 |
| 6902 | 6B | 72921 | IWB72921 | Tdurum_contig62941_85       | 24.1 |
| 6903 | 6B | 49049 | IWB49049 | Kukri_rep_c104879_103       | 24.1 |
| 6904 | 6B | 12597 | IWB12597 | BS00110803_51               | 24.4 |
| 6905 | 6B | 55422 | IWB55422 | RAC875_c2291_123            | 24.4 |
| 6906 | 6B | 35525 | IWB35525 | IAAV8704                    | 24.4 |
| 6907 | 6B | 48897 | IWB48897 | Kukri_rep_c103613_253       | 24.9 |



|      |    |       |          |                              |      |
|------|----|-------|----------|------------------------------|------|
| 6908 | 6B | 46453 | IWB46453 | Kukri_c54773_76              | 24.9 |
| 6909 | 6B | 71392 | IWB71392 | Tdurum_contig43092_876       | 24.9 |
| 6910 | 6B | 11641 | IWB11641 | BS00090069_51                | 24.9 |
| 6911 | 6B | 11643 | IWB11643 | BS00090073_51                | 24.9 |
| 6912 | 6B | 53807 | IWB53807 | RAC875_c13920_747            | 25.2 |
| 6913 | 6B | 2076  | IWB2076  | BobWhite_c27216_137          | 28.7 |
| 6914 | 6B | 69190 | IWB69190 | Tdurum_contig25819_527       | 28.7 |
| 6915 | 6B | 71937 | IWB71937 | Tdurum_contig48939_754       | 29.6 |
| 6916 | 6B | 72401 | IWB72401 | Tdurum_contig5486_177        | 29.6 |
| 6917 | 6B | 60177 | IWB60177 | RAC875_c6837_468             | 29.6 |
| 6918 | 6B | 13395 | IWB13395 | CAP12_c4100_640              | 29.8 |
| 6919 | 6B | 39117 | IWB39117 | Ku_c30637_1294               | 29.8 |
| 6920 | 6B | 35654 | IWB35654 | IACX11060                    | 30.1 |
| 6921 | 6B | 26976 | IWB26976 | Excalibur_c4867_370          | 30.1 |
| 6922 | 6B | 72771 | IWB72771 | Tdurum_contig6121_947        | 30.1 |
| 6923 | 6B | 74027 | IWB74027 | Tdurum_contig98106_715       | 30.1 |
| 6924 | 6B | 68130 | IWB68130 | Tdurum_contig14046_364       | 30.1 |
| 6925 | 6B | 55825 | IWB55825 | RAC875_c25672_473            | 30.1 |
| 6926 | 6B | 5824  | IWB5824  | BS00003214_51                | 30.1 |
| 6927 | 6B | 81293 | IWA8134  | wsnp_Ra_rep_c108218_91556581 | 30.1 |
| 6928 | 6B | 52667 | IWB52667 | Ra_c7721_225                 | 30.1 |
| 6929 | 6B | 55364 | IWB55364 | RAC875_c22549_1037           | 30.1 |
| 6930 | 6B | 44025 | IWB44025 | Kukri_c31822_568             | 30.1 |
| 6931 | 6B | 77981 | IWA3676  | wsnp_Ex_c39304_46634878      | 30.1 |
| 6932 | 6B | 54009 | IWB54009 | RAC875_c14852_2171           | 30.1 |
| 6933 | 6B | 43822 | IWB43822 | Kukri_c3018_865              | 30.1 |
| 6934 | 6B | 25374 | IWB25374 | Excalibur_c33724_303         | 30.1 |
| 6935 | 6B | 19578 | IWB19578 | Ex_c102862_798               | 30.1 |
| 6936 | 6B | 163   | IWB163   | BobWhite_c11042_284          | 30.1 |
| 6937 | 6B | 79687 | IWA5888  | wsnp_JD_c18284_16822042      | 30.1 |
| 6938 | 6B | 90    | IWB90    | BobWhite_c10614_157          | 30.1 |
| 6939 | 6B | 34357 | IWB34357 | IAAV1319                     | 30.1 |
| 6940 | 6B | 25897 | IWB25897 | Excalibur_c3795_198          | 30.1 |
| 6941 | 6B | 79048 | IWA5043  | wsnp_Ex_rep_c102044_87297599 | 30.1 |
| 6942 | 6B | 77431 | IWA2975  | wsnp_Ex_c25505_34771897      | 30.1 |
| 6943 | 6B | 30223 | IWB30223 | Excalibur_rep_c106789_271    | 30.1 |
| 6944 | 6B | 25217 | IWB25217 | Excalibur_c3259_379          | 30.1 |
| 6945 | 6B | 9517  | IWB9517  | BS00065335_51                | 30.1 |
| 6946 | 6B | 9091  | IWB9091  | BS00063608_51                | 30.1 |
| 6947 | 6B | 10803 | IWB10803 | BS00075406_51                | 30.1 |
| 6948 | 6B | 25986 | IWB25986 | Excalibur_c38928_307         | 30.1 |
| 6949 | 6B | 33618 | IWB33618 | GENE-3813_174                | 30.1 |
| 6950 | 6B | 44892 | IWB44892 | Kukri_c39151_460             | 30.1 |
| 6951 | 6B | 65137 | IWB65137 | RFL_Contig5844_291           | 30.1 |
| 6952 | 6B | 77771 | IWA3410  | wsnp_Ex_c3267_6026545        | 30.1 |
| 6953 | 6B | 73067 | IWB73067 | Tdurum_contig67567_93        | 30.1 |
| 6954 | 6B | 77400 | IWA2937  | wsnp_Ex_c24963_34217997      | 30.1 |
| 6955 | 6B | 76096 | IWA1212  | wsnp_CAP8_c7510_3461645      | 30.1 |
| 6956 | 6B | 77841 | IWA3501  | wsnp_Ex_c34962_43193869      | 30.1 |
| 6957 | 6B | 80973 | IWA7689  | wsnp_Ra_c18735_27835674      | 30.1 |
| 6958 | 6B | 12330 | IWB12330 | BS00107795_51                | 30.1 |
| 6959 | 6B | 49791 | IWB49791 | Kukri_rep_c68415_936         | 30.1 |
| 6960 | 6B | 55803 | IWB55803 | RAC875_c25489_1208           | 30.1 |
| 6961 | 6B | 79047 | IWA5042  | wsnp_Ex_rep_c102044_87296690 | 30.1 |

|      |    |       |          |                              |      |
|------|----|-------|----------|------------------------------|------|
| 6962 | 6B | 81184 | IWA7974  | wsnp_Ra_c48999_54089942      | 30.1 |
| 6963 | 6B | 77982 | IWA3677  | wsnp_Ex_c39304_46635517      | 30.1 |
| 6964 | 6B | 2007  | IWB2007  | BobWhite_c26504_163          | 30.1 |
| 6965 | 6B | 44910 | IWB44910 | Kukri_c39321_112             | 30.1 |
| 6966 | 6B | 7680  | IWB7680  | BS00028217_51                | 30.1 |
| 6967 | 6B | 33273 | IWB33273 | GENE-3171_203                | 30.1 |
| 6968 | 6B | 56800 | IWB56800 | RAC875_c33034_408            | 30.1 |
| 6969 | 6B | 77772 | IWA3411  | wsnp_Ex_c3267_6026676        | 30.1 |
| 6970 | 6B | 58376 | IWB58376 | RAC875_c47717_388            | 30.1 |
| 6971 | 6B | 71284 | IWB71284 | Tdurum_contig42557_78        | 30.1 |
| 6972 | 6B | 51136 | IWB51136 | Ra_c14852_1487               | 30.1 |
| 6973 | 6B | 6601  | IWB6601  | BS00014588_51                | 30.1 |
| 6974 | 6B | 10553 | IWB10553 | BS00071498_51                | 30.1 |
| 6975 | 6B | 71712 | IWB71712 | Tdurum_contig46732_711       | 30.1 |
| 6976 | 6B | 11485 | IWB11485 | BS00087190_51                | 30.1 |
| 6977 | 6B | 11233 | IWB11233 | BS00082086_51                | 30.1 |
| 6978 | 6B | 33858 | IWB33858 | GENE-4231_195                | 30.1 |
| 6979 | 6B | 35569 | IWB35569 | IAAV8967                     | 30.1 |
| 6980 | 6B | 7098  | IWB7098  | BS00022462_51                | 30.1 |
| 6981 | 6B | 58613 | IWB58613 | RAC875_c50143_604            | 31.2 |
| 6982 | 6B | 10993 | IWB10993 | BS00078150_51                | 32.3 |
| 6983 | 6B | 17741 | IWB17741 | D_GA8KES401C8IH7_354         | 32.6 |
| 6984 | 6B | 26479 | IWB26479 | Excalibur_c43691_336         | 32.9 |
| 6985 | 6B | 48399 | IWB48399 | Kukri_c9507_142              | 33.1 |
| 6986 | 6B | 1636  | IWB1636  | BobWhite_c22767_189          | 33.1 |
| 6987 | 6B | 14571 | IWB14571 | CAP8_c1851_62                | 33.1 |
| 6988 | 6B | 29847 | IWB29847 | Excalibur_rep_c102619_754    | 33.1 |
| 6989 | 6B | 53597 | IWB53597 | RAC875_c12805_908            | 33.1 |
| 6990 | 6B | 62097 | IWB62097 | RAC875_rep_c111901_103       | 33.1 |
| 6991 | 6B | 65932 | IWB65932 | TA005139-0719                | 33.1 |
| 6992 | 6B | 76345 | IWA1545  | wsnp_Ex_c11873_19047792      | 33.1 |
| 6993 | 6B | 76638 | IWA1911  | wsnp_Ex_c14586_22625563      | 33.1 |
| 6994 | 6B | 77313 | IWA2811  | wsnp_Ex_c23474_32717535      | 33.1 |
| 6995 | 6B | 79091 | IWA5098  | wsnp_Ex_rep_c103497_88437811 | 33.1 |
| 6996 | 6B | 79596 | IWA5748  | wsnp_Ex_rep_c77942_74309566  | 33.1 |
| 6997 | 6B | 79953 | IWA6293  | wsnp_JD_rep_c63108_40258378  | 33.1 |
| 6998 | 6B | 81039 | IWA7783  | wsnp_Ra_c24962_34524602      | 33.1 |
| 6999 | 6B | 81329 | IWA8189  | wsnp_Ra_rep_c73725_71801046  | 33.1 |
| 7000 | 6B | 4623  | IWB4623  | BobWhite_c9563_377           | 33.1 |
| 7001 | 6B | 8461  | IWB8461  | BS00047254_51                | 33.1 |
| 7002 | 6B | 11064 | IWB11064 | BS00079127_51                | 33.1 |
| 7003 | 6B | 23505 | IWB23505 | Excalibur_c20503_382         | 33.1 |
| 7004 | 6B | 25832 | IWB25832 | Excalibur_c37474_868         | 33.1 |
| 7005 | 6B | 26894 | IWB26894 | Excalibur_c47738_334         | 33.1 |
| 7006 | 6B | 29940 | IWB29940 | Excalibur_rep_c103447_433    | 33.1 |
| 7007 | 6B | 43390 | IWB43390 | Kukri_c27172_757             | 33.1 |
| 7008 | 6B | 44956 | IWB44956 | Kukri_c3983_670              | 33.1 |
| 7009 | 6B | 45168 | IWB45168 | Kukri_c41694_285             | 33.1 |
| 7010 | 6B | 55923 | IWB55923 | RAC875_c26400_88             | 33.1 |
| 7011 | 6B | 59821 | IWB59821 | RAC875_c63892_678            | 33.1 |
| 7012 | 6B | 65505 | IWB65505 | TA002165-1178                | 33.1 |
| 7013 | 6B | 66075 | IWB66075 | TA006276-0443                | 33.1 |
| 7014 | 6B | 70154 | IWB70154 | Tdurum_contig31043_89        | 33.1 |
| 7015 | 6B | 75634 | IWA434   | wsnp_BF291478B_Ta_2_1        | 33.1 |

|      |    |       |          |                              |      |
|------|----|-------|----------|------------------------------|------|
| 7016 | 6B | 75771 | IWA617   | wsnp_BQ161448B_Ta_2_1        | 33.1 |
| 7017 | 6B | 77550 | IWA3131  | wsnp_Ex_c27934_37093614      | 33.1 |
| 7018 | 6B | 77941 | IWA3632  | wsnp_Ex_c38150_45749359      | 33.1 |
| 7019 | 6B | 78283 | IWA4065  | wsnp_Ex_c50022_54446632      | 33.1 |
| 7020 | 6B | 78624 | IWA4515  | wsnp_Ex_c6466_11234080       | 33.1 |
| 7021 | 6B | 79088 | IWA5095  | wsnp_Ex_rep_c103466_88415738 | 33.1 |
| 7022 | 6B | 79436 | IWA5531  | wsnp_Ex_rep_c68480_67305954  | 33.1 |
| 7023 | 6B | 80766 | IWA7401  | wsnp_Ku_rep_c103569_90279488 | 33.1 |
| 7024 | 6B | 81193 | IWA7995  | wsnp_Ra_c54050_57499377      | 33.1 |
| 7025 | 6B | 8414  | IWB8414  | BS00045761_51                | 33.1 |
| 7026 | 6B | 8576  | IWB8576  | BS00049942_51                | 33.1 |
| 7027 | 6B | 22608 | IWB22608 | Excalibur_c15335_197         | 33.1 |
| 7028 | 6B | 79211 | IWA5241  | wsnp_Ex_rep_c66458_64697718  | 33.1 |
| 7029 | 6B | 29073 | IWB29073 | Excalibur_c83451_218         | 33.1 |
| 7030 | 6B | 35426 | IWB35426 | IAAV8065                     | 33.1 |
| 7031 | 6B | 8737  | IWB8737  | BS00058305_51                | 33.1 |
| 7032 | 6B | 24410 | IWB24410 | Excalibur_c26143_832         | 33.1 |
| 7033 | 6B | 24414 | IWB24414 | Excalibur_c26172_359         | 33.1 |
| 7034 | 6B | 31272 | IWB31272 | Excalibur_rep_c77166_95      | 33.1 |
| 7035 | 6B | 52913 | IWB52913 | RAC875_c10122_113            | 33.1 |
| 7036 | 6B | 60925 | IWB60925 | RAC875_c88279_291            | 33.1 |
| 7037 | 6B | 78298 | IWA4086  | wsnp_Ex_c5075_9013594        | 33.1 |
| 7038 | 6B | 571   | IWB571   | BobWhite_c13977_91           | 33.1 |
| 7039 | 6B | 78092 | IWA3825  | wsnp_Ex_c42372_48966781      | 33.1 |
| 7040 | 6B | 81322 | IWA8175  | wsnp_Ra_rep_c70906_68868576  | 33.1 |
| 7041 | 6B | 32974 | IWB32974 | GENE-2561_575                | 33.1 |
| 7042 | 6B | 36647 | IWB36647 | Jagger_c555_818              | 33.1 |
| 7043 | 6B | 49077 | IWB49077 | Kukri_rep_c105243_341        | 33.1 |
| 7044 | 6B | 73415 | IWB73415 | Tdurum_contig77234_467       | 33.1 |
| 7045 | 6B | 10170 | IWB10170 | BS00067871_51                | 33.1 |
| 7046 | 6B | 58178 | IWB58178 | RAC875_c45791_450            | 33.1 |
| 7047 | 6B | 59819 | IWB59819 | RAC875_c63892_170            | 33.1 |
| 7048 | 6B | 77053 | IWA2451  | wsnp_Ex_c19707_28702378      | 33.1 |
| 7049 | 6B | 77204 | IWA2652  | wsnp_Ex_c21783_30944914      | 33.1 |
| 7050 | 6B | 81291 | IWA8129  | wsnp_Ra_rep_c106754_90462550 | 33.1 |
| 7051 | 6B | 826   | IWB826   | BobWhite_c15653_484          | 33.1 |
| 7052 | 6B | 20822 | IWB20822 | Ex_c49055_617                | 33.1 |
| 7053 | 6B | 42338 | IWB42338 | Kukri_c20529_1006            | 33.1 |
| 7054 | 6B | 59820 | IWB59820 | RAC875_c63892_604            | 33.1 |
| 7055 | 6B | 63659 | IWB63659 | RFL_Contig1492_1183          | 33.1 |
| 7056 | 6B | 68374 | IWB68374 | Tdurum_contig15235_951       | 33.1 |
| 7057 | 6B | 78846 | IWA4783  | wsnp_Ex_c8267_13954978       | 33.1 |
| 7058 | 6B | 81205 | IWA8011  | wsnp_Ra_c57648_59682822      | 33.1 |
| 7059 | 6B | 43114 | IWB43114 | Kukri_c25377_106             | 33.1 |
| 7060 | 6B | 29201 | IWB29201 | Excalibur_c8724_348          | 33.1 |
| 7061 | 6B | 9173  | IWB9173  | BS00064028_51                | 33.1 |
| 7062 | 6B | 38105 | IWB38105 | Ku_c1044_1007                | 33.1 |
| 7063 | 6B | 23092 | IWB23092 | Excalibur_c18182_760         | 33.1 |
| 7064 | 6B | 42994 | IWB42994 | Kukri_c24590_532             | 33.1 |
| 7065 | 6B | 49834 | IWB49834 | Kukri_rep_c68962_1971        | 33.1 |
| 7066 | 6B | 79202 | IWA5231  | wsnp_Ex_rep_c66409_64618153  | 33.1 |
| 7067 | 6B | 38805 | IWB38805 | Ku_c22026_1410               | 33.1 |
| 7068 | 6B | 66024 | IWB66024 | TA005843-0691                | 33.1 |
| 7069 | 6B | 55937 | IWB55937 | RAC875_c26487_118            | 33.1 |

|      |    |       |          |                              |      |
|------|----|-------|----------|------------------------------|------|
| 7070 | 6B | 51636 | IWB51636 | Ra_c26597_342                | 33.1 |
| 7071 | 6B | 76800 | IWA2109  | wsnp_Ex_c16243_24699942      | 33.1 |
| 7072 | 6B | 8543  | IWB8543  | BS00049565_51                | 33.1 |
| 7073 | 6B | 35826 | IWB35826 | IACX203                      | 33.1 |
| 7074 | 6B | 32983 | IWB32983 | GENE-2606_197                | 33.1 |
| 7075 | 6B | 1670  | IWB1670  | BobWhite_c23142_415          | 33.1 |
| 7076 | 6B | 56066 | IWB56066 | RAC875_c27431_212            | 33.1 |
| 7077 | 6B | 7574  | IWB7574  | BS00025302_51                | 33.1 |
| 7078 | 6B | 743   | IWB743   | BobWhite_c1509_622           | 33.4 |
| 7079 | 6B | 20804 | IWB20804 | Ex_c4801_295                 | 33.4 |
| 7080 | 6B | 57854 | IWB57854 | RAC875_c42551_141            | 33.4 |
| 7081 | 6B | 5780  | IWB5780  | BS00001100_51                | 33.4 |
| 7082 | 6B | 8690  | IWB8690  | BS00056278_51                | 33.4 |
| 7083 | 6B | 4511  | IWB4511  | BobWhite_c872_620            | 33.4 |
| 7084 | 6B | 27622 | IWB27622 | Excalibur_c56046_379         | 34.0 |
| 7085 | 6B | 9097  | IWB9097  | BS00063631_51                | 34.6 |
| 7086 | 6B | 7047  | IWB7047  | BS00022370_51                | 34.6 |
| 7087 | 6B | 81332 | IWA8192  | wsnp_Ra_rep_c73731_71807419  | 34.6 |
| 7088 | 6B | 78208 | IWA3971  | wsnp_Ex_c46392_51913200      | 34.6 |
| 7089 | 6B | 57747 | IWB57747 | RAC875_c41604_1001           | 34.6 |
| 7090 | 6B | 43115 | IWB43115 | Kukri_c25377_240             | 34.6 |
| 7091 | 6B | 6978  | IWB6978  | BS00022226_51                | 34.6 |
| 7092 | 6B | 8966  | IWB8966  | BS00062970_51                | 34.6 |
| 7093 | 6B | 6714  | IWB6714  | BS00021686_51                | 34.6 |
| 7094 | 6B | 55718 | IWB55718 | RAC875_c24962_1326           | 34.6 |
| 7095 | 6B | 5932  | IWB5932  | BS00003955_51                | 34.6 |
| 7096 | 6B | 902   | IWB902   | BobWhite_c16301_60           | 34.6 |
| 7097 | 6B | 81330 | IWA8190  | wsnp_Ra_rep_c73725_71801179  | 34.6 |
| 7098 | 6B | 80747 | IWA7380  | wsnp_Ku_rep_c101389_88563086 | 34.6 |
| 7099 | 6B | 78130 | IWA3869  | wsnp_Ex_c43499_49801559      | 34.6 |
| 7100 | 6B | 56000 | IWB56000 | RAC875_c26887_562            | 34.6 |
| 7101 | 6B | 55300 | IWB55300 | RAC875_c22101_656            | 34.6 |
| 7102 | 6B | 50529 | IWB50529 | Kukri_rep_c94998_153         | 34.6 |
| 7103 | 6B | 32014 | IWB32014 | GENE-0659_105                | 34.6 |
| 7104 | 6B | 8575  | IWB8575  | BS00049941_51                | 34.6 |
| 7105 | 6B | 8249  | IWB8249  | BS00040868_51                | 34.6 |
| 7106 | 6B | 3623  | IWB3623  | BobWhite_c47831_87           | 34.6 |
| 7107 | 6B | 78204 | IWA3963  | wsnp_Ex_c46160_51746546      | 34.6 |
| 7108 | 6B | 76507 | IWA1743  | wsnp_Ex_c1319_2522992        | 34.6 |
| 7109 | 6B | 46262 | IWB46262 | Kukri_c52515_442             | 34.6 |
| 7110 | 6B | 5090  | IWB5090  | BobWhite_rep_c54531_95       | 34.6 |
| 7111 | 6B | 672   | IWB672   | BobWhite_c14575_323          | 34.6 |
| 7112 | 6B | 80955 | IWA7663  | wsnp_Ra_c16850_25605248      | 34.6 |
| 7113 | 6B | 43271 | IWB43271 | Kukri_c26279_503             | 34.6 |
| 7114 | 6B | 37060 | IWB37060 | JD_c15653_302                | 34.6 |
| 7115 | 6B | 33714 | IWB33714 | GENE-3990_27                 | 34.6 |
| 7116 | 6B | 10399 | IWB10399 | BS00069368_51                | 34.6 |
| 7117 | 6B | 2587  | IWB2587  | BobWhite_c32911_243          | 34.6 |
| 7118 | 6B | 81301 | IWA8144  | wsnp_Ra_rep_c111161_93528347 | 34.6 |
| 7119 | 6B | 80926 | IWA7628  | wsnp_Ra_c14498_22667649      | 34.6 |
| 7120 | 6B | 80324 | IWA6826  | wsnp_Ku_c27423_37369377      | 34.6 |
| 7121 | 6B | 80323 | IWA6825  | wsnp_Ku_c27423_37369145      | 34.6 |
| 7122 | 6B | 79852 | IWA6142  | wsnp_JD_c6448_7610859        | 34.6 |
| 7123 | 6B | 79212 | IWA5242  | wsnp_Ex_rep_c66458_64698299  | 34.6 |

|      |    |       |          |                              |      |
|------|----|-------|----------|------------------------------|------|
| 7124 | 6B | 79141 | IWA5157  | wsnp_Ex_rep_c107572_91149113 | 34.6 |
| 7125 | 6B | 79094 | IWA5104  | wsnp_Ex_rep_c103767_88641111 | 34.6 |
| 7126 | 6B | 79089 | IWA5096  | wsnp_Ex_rep_c103466_88415994 | 34.6 |
| 7127 | 6B | 78601 | IWA4487  | wsnp_Ex_c6358_11058700       | 34.6 |
| 7128 | 6B | 77801 | IWA3450  | wsnp_Ex_c33813_42239400      | 34.6 |
| 7129 | 6B | 76860 | IWA2185  | wsnp_Ex_c17051_25671072      | 34.6 |
| 7130 | 6B | 76565 | IWA1815  | wsnp_Ex_c13816_21656469      | 34.6 |
| 7131 | 6B | 76308 | IWA1499  | wsnp_Ex_c1145_2198295        | 34.6 |
| 7132 | 6B | 65595 | IWB65595 | TA002706-2669                | 34.6 |
| 7133 | 6B | 52675 | IWB52675 | Ra_c77985_260                | 34.6 |
| 7134 | 6B | 45150 | IWB45150 | Kukri_c41527_436             | 34.6 |
| 7135 | 6B | 43519 | IWB43519 | Kukri_c2800_103              | 34.6 |
| 7136 | 6B | 42501 | IWB42501 | Kukri_c21409_283             | 34.6 |
| 7137 | 6B | 40081 | IWB40081 | Ku_c8353_937                 | 34.6 |
| 7138 | 6B | 39181 | IWB39181 | Ku_c32537_241                | 34.6 |
| 7139 | 6B | 38978 | IWB38978 | Ku_c2606_779                 | 34.6 |
| 7140 | 6B | 38340 | IWB38340 | Ku_c12681_198                | 34.6 |
| 7141 | 6B | 34882 | IWB34882 | IAAV4514                     | 34.6 |
| 7142 | 6B | 34512 | IWB34512 | IAAV2161                     | 34.6 |
| 7143 | 6B | 33747 | IWB33747 | GENE-4048_299                | 34.6 |
| 7144 | 6B | 28993 | IWB28993 | Excalibur_c81461_138         | 34.6 |
| 7145 | 6B | 28902 | IWB28902 | Excalibur_c79066_165         | 34.6 |
| 7146 | 6B | 27425 | IWB27425 | Excalibur_c53834_416         | 34.6 |
| 7147 | 6B | 27220 | IWB27220 | Excalibur_c5136_2314         | 34.6 |
| 7148 | 6B | 23978 | IWB23978 | Excalibur_c23462_677         | 34.6 |
| 7149 | 6B | 23897 | IWB23897 | Excalibur_c22998_621         | 34.6 |
| 7150 | 6B | 23220 | IWB23220 | Excalibur_c18881_383         | 34.6 |
| 7151 | 6B | 19685 | IWB19685 | Ex_c1145_552                 | 34.6 |
| 7152 | 6B | 11021 | IWB11021 | BS00078597_51                | 34.6 |
| 7153 | 6B | 9338  | IWB9338  | BS00064654_51                | 34.6 |
| 7154 | 6B | 8644  | IWB8644  | BS00054287_51                | 34.6 |
| 7155 | 6B | 2875  | IWB2875  | BobWhite_c36911_355          | 34.6 |
| 7156 | 6B | 1106  | IWB1106  | BobWhite_c17876_192          | 34.6 |
| 7157 | 6B | 71602 | IWB71602 | Tdurum_contig45370_324       | 34.6 |
| 7158 | 6B | 66131 | IWB66131 | TA015451-0472                | 34.6 |
| 7159 | 6B | 65914 | IWB65914 | TA005016-0827                | 34.6 |
| 7160 | 6B | 33826 | IWB33826 | GENE-4195_165                | 34.6 |
| 7161 | 6B | 26526 | IWB26526 | Excalibur_c44109_144         | 34.6 |
| 7162 | 6B | 2737  | IWB2737  | BobWhite_c34920_228          | 34.6 |
| 7163 | 6B | 78291 | IWA4078  | wsnp_Ex_c5058_8981554        | 34.6 |
| 7164 | 6B | 76783 | IWA2090  | wsnp_Ex_c1603_3056226        | 34.6 |
| 7165 | 6B | 75969 | IWA941   | wsnp_CAP12_c242_135767       | 34.6 |
| 7166 | 6B | 69753 | IWB69753 | Tdurum_contig29294_171       | 34.6 |
| 7167 | 6B | 49923 | IWB49923 | Kukri_rep_c69660_52          | 34.6 |
| 7168 | 6B | 46081 | IWB46081 | Kukri_c50603_164             | 34.6 |
| 7169 | 6B | 42209 | IWB42209 | Kukri_c1982_1406             | 34.6 |
| 7170 | 6B | 39182 | IWB39182 | Ku_c32537_247                | 34.6 |
| 7171 | 6B | 38393 | IWB38393 | Ku_c13514_146                | 34.6 |
| 7172 | 6B | 38106 | IWB38106 | Ku_c1044_2005                | 34.6 |
| 7173 | 6B | 31833 | IWB31833 | GENE-0363_168                | 34.6 |
| 7174 | 6B | 13931 | IWB13931 | CAP7_c2536_65                | 34.6 |
| 7175 | 6B | 12289 | IWB12289 | BS00106588_51                | 34.6 |
| 7176 | 6B | 76118 | IWA1251  | wsnp_CD452643B_Ta_2_1        | 35.4 |
| 7177 | 6B | 9950  | IWB9950  | BS00067073_51                | 35.4 |

|      |    |       |          |                             |      |
|------|----|-------|----------|-----------------------------|------|
| 7178 | 6B | 53703 | IWB53703 | RAC875_c13325_109           | 35.4 |
| 7179 | 6B | 36146 | IWB36146 | IACX6349                    | 35.4 |
| 7180 | 6B | 12855 | IWB12855 | CAP11_c3599_113             | 35.7 |
| 7181 | 6B | 72677 | IWB72677 | Tdurum_contig5968_365       | 37.1 |
| 7182 | 6B | 75985 | IWA971   | wsnp_CAP12_c527_285541      | 37.1 |
| 7183 | 6B | 78614 | IWA4502  | wsnp_Ex_c6401_11124792      | 37.1 |
| 7184 | 6B | 11619 | IWB11619 | BS00089580_51               | 37.1 |
| 7185 | 6B | 78612 | IWA4500  | wsnp_Ex_c6401_11124462      | 37.1 |
| 7186 | 6B | 81174 | IWA7962  | wsnp_Ra_c47601_53118036     | 37.1 |
| 7187 | 6B | 43566 | IWB43566 | Kukri_c2842_248             | 37.1 |
| 7188 | 6B | 78613 | IWA4501  | wsnp_Ex_c6401_11124623      | 37.1 |
| 7189 | 6B | 75868 | IWA755   | wsnp_CAP11_c3599_1741800    | 37.1 |
| 7190 | 6B | 8492  | IWB8492  | BS00048191_51               | 37.1 |
| 7191 | 6B | 68061 | IWB68061 | Tdurum_contig13698_141      | 37.1 |
| 7192 | 6B | 46344 | IWB46344 | Kukri_c53506_1141           | 37.1 |
| 7193 | 6B | 23743 | IWB23743 | Excalibur_c22075_166        | 37.1 |
| 7194 | 6B | 21249 | IWB21249 | Ex_c7101_596                | 37.1 |
| 7195 | 6B | 70448 | IWB70448 | Tdurum_contig33717_301      | 37.3 |
| 7196 | 6B | 79973 | IWA6329  | wsnp_JG_c1834_901723        | 37.3 |
| 7197 | 6B | 23748 | IWB23748 | Excalibur_c22106_190        | 37.3 |
| 7198 | 6B | 73860 | IWB73860 | Tdurum_contig93283_513      | 37.3 |
| 7199 | 6B | 25654 | IWB25654 | Excalibur_c35964_205        | 39.3 |
| 7200 | 6B | 71546 | IWB71546 | Tdurum_contig44825_307      | 39.3 |
| 7201 | 6B | 73225 | IWB73225 | Tdurum_contig74717_436      | 39.3 |
| 7202 | 6B | 75807 | IWA670   | wsnp_CAP11_c1432_806102     | 39.5 |
| 7203 | 6B | 14152 | IWB14152 | CAP7_c5075_412              | 39.5 |
| 7204 | 6B | 47763 | IWB47763 | Kukri_c78348_266            | 42.1 |
| 7205 | 6B | 76129 | IWA1267  | wsnp_CV776265A_Ta_2_1       | 42.1 |
| 7206 | 6B | 21972 | IWB21972 | Excalibur_c11817_1125       | 42.1 |
| 7207 | 6B | 81445 | IWA8383  | wsnp_RFL_Contig2747_2479869 | 42.1 |
| 7208 | 6B | 46624 | IWB46624 | Kukri_c56955_282            | 42.1 |
| 7209 | 6B | 44150 | IWB44150 | Kukri_c3292_670             | 42.4 |
| 7210 | 6B | 33843 | IWB33843 | GENE-4221_94                | 46.1 |
| 7211 | 6B | 63931 | IWB63931 | RFL_Contig2387_1410         | 46.1 |
| 7212 | 6B | 75981 | IWA967   | wsnp_CAP12_c475_258416      | 46.1 |
| 7213 | 6B | 13414 | IWB13414 | CAP12_c475_289              | 46.1 |
| 7214 | 6B | 33842 | IWB33842 | GENE-4221_519               | 46.1 |
| 7215 | 6B | 35772 | IWB35772 | IACX1609                    | 46.1 |
| 7216 | 6B | 13413 | IWB13413 | CAP12_c475_166              | 46.1 |
| 7217 | 6B | 12395 | IWB12395 | BS00109036_51               | 46.7 |
| 7218 | 6B | 59482 | IWB59482 | RAC875_c60007_199           | 46.7 |
| 7219 | 6B | 58733 | IWB58733 | RAC875_c5129_280            | 46.9 |
| 7220 | 6B | 290   | IWB290   | BobWhite_c12013_977         | 47.2 |
| 7221 | 6B | 288   | IWB288   | BobWhite_c12013_1151        | 47.2 |
| 7222 | 6B | 10702 | IWB10702 | BS00074024_51               | 47.2 |
| 7223 | 6B | 62307 | IWB62307 | RAC875_rep_c115149_515      | 47.2 |
| 7224 | 6B | 65851 | IWB65851 | TA004523-0997               | 47.2 |
| 7225 | 6B | 62306 | IWB62306 | RAC875_rep_c115149_377      | 47.2 |
| 7226 | 6B | 62308 | IWB62308 | RAC875_rep_c115149_85       | 47.2 |
| 7227 | 6B | 29867 | IWB29867 | Excalibur_rep_c102798_288   | 47.2 |
| 7228 | 6B | 66124 | IWB66124 | TA014972-0344               | 47.5 |
| 7229 | 6B | 33761 | IWB33761 | GENE-4069_85                | 48.3 |
| 7230 | 6B | 9273  | IWB9273  | BS00064409_51               | 48.3 |
| 7231 | 6B | 9004  | IWB9004  | BS00063103_51               | 48.3 |

|      |    |       |          |                         |      |
|------|----|-------|----------|-------------------------|------|
| 7232 | 6B | 25445 | IWB25445 | Excalibur_c3432_459     | 48.3 |
| 7233 | 6B | 906   | IWB906   | BobWhite_c1633_643      | 48.3 |
| 7234 | 6B | 77617 | IWA3221  | wsnp_Ex_c2925_5397331   | 48.3 |
| 7235 | 6B | 75611 | IWA404   | wsnp_BE637911B_Ta_2_1   | 48.3 |
| 7236 | 6B | 58494 | IWB58494 | RAC875_c4891_99         | 48.3 |
| 7237 | 6B | 35681 | IWB35681 | IACX11289               | 48.3 |
| 7238 | 6B | 29386 | IWB29386 | Excalibur_c92249_102    | 48.3 |
| 7239 | 6B | 72325 | IWB72325 | Tdurum_contig53779_1074 | 48.3 |
| 7240 | 6B | 10330 | IWB10330 | BS00068506_51           | 48.3 |
| 7241 | 6B | 71722 | IWB71722 | Tdurum_contig46808_4106 | 48.3 |
| 7242 | 6B | 76408 | IWA1628  | wsnp_Ex_c12433_19826311 | 48.3 |
| 7243 | 6B | 60413 | IWB60413 | RAC875_c7630_1383       | 48.3 |
| 7244 | 6B | 75612 | IWA405   | wsnp_BE637911B_Ta_2_2   | 48.3 |
| 7245 | 6B | 8110  | IWB8110  | BS00037464_51           | 48.3 |
| 7246 | 6B | 33781 | IWB33781 | GENE-4093_178           | 48.3 |
| 7247 | 6B | 33589 | IWB33589 | GENE-3758_627           | 48.3 |
| 7248 | 6B | 76409 | IWA1629  | wsnp_Ex_c12433_19827016 | 48.3 |
| 7249 | 6B | 58149 | IWB58149 | RAC875_c45515_65        | 48.3 |
| 7250 | 6B | 55511 | IWB55511 | RAC875_c23461_428       | 48.3 |
| 7251 | 6B | 45810 | IWB45810 | Kukri_c4780_395         | 48.3 |
| 7252 | 6B | 25446 | IWB25446 | Excalibur_c3432_98      | 48.3 |
| 7253 | 6B | 14386 | IWB14386 | CAP7_rep_c12929_169     | 48.3 |
| 7254 | 6B | 8109  | IWB8109  | BS00037462_51           | 48.3 |
| 7255 | 6B | 14387 | IWB14387 | CAP7_rep_c12929_224     | 48.3 |
| 7256 | 6B | 77073 | IWA2474  | wsnp_Ex_c19874_28891457 | 48.3 |
| 7257 | 6B | 24572 | IWB24572 | Excalibur_c2737_197     | 48.3 |
| 7258 | 6B | 46771 | IWB46771 | Kukri_c58961_76         | 48.3 |
| 7259 | 6B | 46184 | IWB46184 | Kukri_c5168_162         | 49.7 |
| 7260 | 6B | 72198 | IWB72198 | Tdurum_contig51640_847  | 49.7 |
| 7261 | 6B | 22095 | IWB22095 | Excalibur_c12464_390    | 49.7 |
| 7262 | 6B | 51320 | IWB51320 | Ra_c18658_1048          | 49.7 |
| 7263 | 6B | 7881  | IWB7881  | BS00032243_51           | 50.0 |
| 7264 | 6B | 9964  | IWB9964  | BS00067129_51           | 50.2 |
| 7265 | 6B | 70366 | IWB70366 | Tdurum_contig32579_121  | 50.2 |
| 7266 | 6B | 22960 | IWB22960 | Excalibur_c17348_264    | 50.2 |
| 7267 | 6B | 12742 | IWB12742 | CAP11_c204_238          | 50.2 |
| 7268 | 6B | 36530 | IWB36530 | Jagger_c3235_381        | 50.2 |
| 7269 | 6B | 81245 | IWA8064  | wsnp_Ra_c7468_12851157  | 50.2 |
| 7270 | 6B | 22961 | IWB22961 | Excalibur_c17348_300    | 50.2 |
| 7271 | 6B | 77141 | IWA2564  | wsnp_Ex_c20999_30122041 | 50.2 |
| 7272 | 6B | 74080 | IWB74080 | tplb0021a17_853         | 50.2 |
| 7273 | 6B | 45036 | IWB45036 | Kukri_c40428_72         | 50.8 |
| 7274 | 6B | 78792 | IWA4717  | wsnp_Ex_c7713_13153321  | 51.0 |
| 7275 | 6B | 26890 | IWB26890 | Excalibur_c47675_176    | 51.0 |
| 7276 | 6B | 10199 | IWB10199 | BS00067983_51           | 51.0 |
| 7277 | 6B | 39172 | IWB39172 | Ku_c32100_105           | 51.0 |
| 7278 | 6B | 47632 | IWB47632 | Kukri_c75359_152        | 51.0 |
| 7279 | 6B | 76566 | IWA1816  | wsnp_Ex_c1383_2651887   | 51.0 |
| 7280 | 6B | 76567 | IWA1817  | wsnp_Ex_c1383_2652398   | 51.0 |
| 7281 | 6B | 60708 | IWB60708 | RAC875_c82640_416       | 51.6 |
| 7282 | 6B | 2759  | IWB2759  | BobWhite_c3514_717      | 51.6 |
| 7283 | 6B | 52227 | IWB52227 | Ra_c5297_2104           | 51.6 |
| 7284 | 6B | 73204 | IWB73204 | Tdurum_contig71517_158  | 51.6 |
| 7285 | 6B | 50537 | IWB50537 | Kukri_rep_c95718_805    | 51.6 |

|      |    |       |          |                             |      |
|------|----|-------|----------|-----------------------------|------|
| 7286 | 6B | 8068  | IWB8068  | BS00036830_51               | 52.1 |
| 7287 | 6B | 68655 | IWB68655 | Tdurum_contig17421_310      | 52.1 |
| 7288 | 6B | 34340 | IWB34340 | IAAV1218                    | 52.1 |
| 7289 | 6B | 7417  | IWB7417  | BS00023080_51               | 52.1 |
| 7290 | 6B | 30504 | IWB30504 | Excalibur_rep_c110824_66    | 52.1 |
| 7291 | 6B | 12425 | IWB12425 | BS00109717_51               | 52.1 |
| 7292 | 6B | 65959 | IWB65959 | TA005327-0480               | 53.8 |
| 7293 | 6B | 27812 | IWB27812 | Excalibur_c58410_729        | 53.8 |
| 7294 | 6B | 63870 | IWB63870 | RFL_Contig2206_1694         | 53.8 |
| 7295 | 6B | 79538 | IWA5666  | wsnp_Ex_rep_c70036_68988728 | 53.8 |
| 7296 | 6B | 19986 | IWB19986 | Ex_c17379_1431              | 55.8 |
| 7297 | 6B | 76881 | IWA2212  | wsnp_Ex_c17379_26073344     | 55.8 |
| 7298 | 6B | 24596 | IWB24596 | Excalibur_c276_1585         | 58.7 |
| 7299 | 6B | 49568 | IWB49568 | Kukri_rep_c112678_555       | 58.7 |
| 7300 | 6B | 10268 | IWB10268 | BS00068245_51               | 58.7 |
| 7301 | 6B | 36435 | IWB36435 | Jagger_c1231_85             | 76.7 |
| 7302 | 6B | 64113 | IWB64113 | RFL_Contig2877_804          | 76.7 |
| 7303 | 6B | 71379 | IWB71379 | Tdurum_contig42927_1141     | 77.5 |
| 7304 | 6B | 59005 | IWB59005 | RAC875_c5413_1237           | 77.8 |
| 7305 | 6B | 78423 | IWA4246  | wsnp_Ex_c54772_57528275     | 77.8 |
| 7306 | 6B | 67459 | IWB67459 | Tdurum_contig12123_197      | 77.8 |
| 7307 | 6B | 72761 | IWB72761 | Tdurum_contig60988_365      | 77.8 |
| 7308 | 6B | 13085 | IWB13085 | CAP11_c949_196              | 77.8 |
| 7309 | 6B | 72471 | IWB72471 | Tdurum_contig55744_822      | 77.8 |
| 7310 | 6B | 30288 | IWB30288 | Excalibur_rep_c107705_351   | 77.8 |
| 7311 | 6B | 31243 | IWB31243 | Excalibur_rep_c75101_108    | 77.8 |
| 7312 | 6B | 70317 | IWB70317 | Tdurum_contig3203_291       | 77.8 |
| 7313 | 6B | 14375 | IWB14375 | CAP7_rep_c12573_126         | 77.8 |
| 7314 | 6B | 70316 | IWB70316 | Tdurum_contig3203_208       | 77.8 |
| 7315 | 6B | 30438 | IWB30438 | Excalibur_rep_c109798_389   | 77.8 |
| 7316 | 6B | 30284 | IWB30284 | Excalibur_rep_c107658_638   | 77.8 |
| 7317 | 6B | 59006 | IWB59006 | RAC875_c5413_1266           | 77.8 |
| 7318 | 6B | 3121  | IWB3121  | BobWhite_c40465_344         | 78.1 |
| 7319 | 6B | 58199 | IWB58199 | RAC875_c45987_106           | 78.9 |
| 7320 | 6B | 33694 | IWB33694 | GENE-3965_471               | 79.1 |
| 7321 | 6B | 59306 | IWB59306 | RAC875_c57692_88            | 79.7 |
| 7322 | 6B | 72122 | IWB72122 | Tdurum_contig50822_456      | 79.7 |
| 7323 | 6B | 33847 | IWB33847 | GENE-4225_117               | 80.0 |
| 7324 | 6B | 10851 | IWB10851 | BS00076101_51               | 83.4 |
| 7325 | 6B | 54633 | IWB54633 | RAC875_c1823_1681           | 83.7 |
| 7326 | 6B | 65615 | IWB65615 | TA002907-0816               | 83.7 |
| 7327 | 6B | 54402 | IWB54402 | RAC875_c17011_717           | 83.7 |
| 7328 | 6B | 46894 | IWB46894 | Kukri_c60966_261            | 83.7 |
| 7329 | 6D | 78233 | IWA4000  | wsnp_Ex_c4789_8550135       | 0.0  |
| 7330 | 6D | 80209 | IWA6673  | wsnp_Ku_c19587_29102203     | 0.3  |
| 7331 | 6D | 206   | IWB206   | BobWhite_c11347_194         | 0.3  |
| 7332 | 6D | 46507 | IWB46507 | Kukri_c55362_75             | 0.3  |
| 7333 | 6D | 64081 | IWB64081 | RFL_Contig2815_1135         | 0.3  |
| 7334 | 6D | 55116 | IWB55116 | RAC875_c2102_3487           | 0.3  |
| 7335 | 6D | 65608 | IWB65608 | TA002853-0110-w             | 0.3  |
| 7336 | 6D | 76629 | IWA1896  | wsnp_Ex_c14439_22426200     | 0.3  |
| 7337 | 6D | 77810 | IWA3461  | wsnp_Ex_c3405_6252997       | 1.1  |
| 7338 | 6D | 61233 | IWB61233 | RAC875_c98242_422           | 1.1  |
| 7339 | 6D | 59282 | IWB59282 | RAC875_c57371_238           | 1.1  |



|      |    |       |          |                             |       |
|------|----|-------|----------|-----------------------------|-------|
| 7340 | 6D | 48184 | IWB48184 | Kukri_c89555_57             | 1.1   |
| 7341 | 6D | 20535 | IWB20535 | Ex_c3405_203                | 1.1   |
| 7342 | 6D | 4285  | IWB4285  | BobWhite_c7090_522          | 1.4   |
| 7343 | 6D | 4286  | IWB4286  | BobWhite_c7090_778          | 1.4   |
| 7344 | 6D | 31346 | IWB31346 | Excalibur_rep_c84264_67     | 1.7   |
| 7345 | 6D | 49820 | IWB49820 | Kukri_rep_c68823_315        | 1.9   |
| 7346 | 6D | 31561 | IWB31561 | Excalibur_s114066_247       | 1.9   |
| 7347 | 6D | 9065  | IWB9065  | BS00063476_51               | 1.9   |
| 7348 | 6D | 49821 | IWB49821 | Kukri_rep_c68823_696        | 1.9   |
| 7349 | 6D | 15852 | IWB15852 | D_contig17056_55            | 2.5   |
| 7350 | 6D | 18587 | IWB18587 | D_GBUVHFX01BJVOK_322        | 12.8  |
| 7351 | 6D | 75262 | IWB75262 | tplb0060j17_363             | 16.4  |
| 7352 | 6D | 74251 | IWB74251 | tplb0025k19_1539            | 16.6  |
| 7353 | 6D | 5908  | IWB5908  | BS00003852_51               | 26.4  |
| 7354 | 6D | 55904 | IWB55904 | RAC875_c26177_632           | 26.4  |
| 7355 | 6D | 74684 | IWB74684 | tplb0040h19_458             | 30.7  |
| 7356 | 6D | 15253 | IWB15253 | D_contig03207_141           | 40.6  |
| 7357 | 6D | 81537 | IWA8540  | wsnp_RFL_Contig3946_4380285 | 40.8  |
| 7358 | 6D | 56138 | IWB56138 | RAC875_c27962_341           | 43.1  |
| 7359 | 6D | 65231 | IWB65231 | RFL_Contig6162_597          | 44.2  |
| 7360 | 6D | 29676 | IWB29676 | Excalibur_c9970_273         | 49.0  |
| 7361 | 6D | 18875 | IWB18875 | D_GCE8AKX02GZU30_69         | 49.5  |
| 7362 | 6D | 49888 | IWB49888 | Kukri_rep_c69358_828        | 49.5  |
| 7363 | 6D | 44500 | IWB44500 | Kukri_c35949_523            | 49.8  |
| 7364 | 6D | 64459 | IWB64459 | RFL_Contig3710_359          | 52.1  |
| 7365 | 6D | 16167 | IWB16167 | D_contig24171_152           | 57.6  |
| 7366 | 6D | 16888 | IWB16888 | D_contig55758_483           | 57.6  |
| 7367 | 6D | 16191 | IWB16191 | D_contig24690_252           | 57.6  |
| 7368 | 6D | 26326 | IWB26326 | Excalibur_c42372_1617       | 57.6  |
| 7369 | 6D | 81364 | IWA8245  | wsnp_RFL_Contig1427_580520  | 57.8  |
| 7370 | 6D | 44501 | IWB44501 | Kukri_c35951_337            | 58.1  |
| 7371 | 6D | 35645 | IWB35645 | IACX10982                   | 60.7  |
| 7372 | 6D | 18817 | IWB18817 | D_GCE8AKX01CTXDI_46         | 62.3  |
| 7373 | 6D | 81394 | IWA8292  | wsnp_RFL_Contig2100_1362130 | 62.6  |
| 7374 | 6D | 29064 | IWB29064 | Excalibur_c8325_1317        | 62.6  |
| 7375 | 6D | 18096 | IWB18096 | D_GB5Y7FA02HFOHW_127        | 68.7  |
| 7376 | 6D | 19509 | IWB19509 | D_wsnpbe497701_Contig1_2    | 68.7  |
| 7377 | 6D | 15745 | IWB15745 | D_contig14679_369           | 68.7  |
| 7378 | 6D | 26550 | IWB26550 | Excalibur_c4445_307         | 68.7  |
| 7379 | 6D | 41519 | IWB41519 | Kukri_c16093_636            | 68.7  |
| 7380 | 6D | 17634 | IWB17634 | D_F5XZDLF02HAE1S_321        | 68.7  |
| 7381 | 6D | 80917 | IWA7616  | wsnp_Ra_c13881_21836489     | 70.7  |
| 7382 | 6D | 25578 | IWB25578 | Excalibur_c3526_106         | 89.8  |
| 7383 | 6D | 42267 | IWB42267 | Kukri_c20152_490            | 91.8  |
| 7384 | 6D | 54977 | IWB54977 | RAC875_c20242_284           | 93.0  |
| 7385 | 6D | 17785 | IWB17785 | D_GA8KES401DM316_316        | 93.2  |
| 7386 | 6D | 45922 | IWB45922 | Kukri_c48922_244            | 93.2  |
| 7387 | 6D | 18838 | IWB18838 | D_GCE8AKX01DVTYJ_306        | 93.2  |
| 7388 | 6D | 45921 | IWB45921 | Kukri_c48922_152            | 93.2  |
| 7389 | 6D | 63310 | IWB63310 | RAC875_rep_c92223_254       | 93.5  |
| 7390 | 6D | 46628 | IWB46628 | Kukri_c57006_127            | 97.7  |
| 7391 | 6D | 24811 | IWB24811 | Excalibur_c2925_238         | 98.8  |
| 7392 | 6D | 81464 | IWA8408  | wsnp_RFL_Contig2937_2798959 | 105.6 |
| 7393 | 6D | 81465 | IWA8412  | wsnp_RFL_Contig2978_2848362 | 105.6 |

|      |    |       |          |                              |       |
|------|----|-------|----------|------------------------------|-------|
| 7394 | 6D | 6336  | IWB6336  | BS00011061_51                | 105.6 |
| 7395 | 6D | 81513 | IWA8503  | wsnp_RFL_Contig3708_3946935  | 109.1 |
| 7396 | 6D | 17801 | IWB17801 | D_GA8KES401EBZR6_76          | 110.3 |
| 7397 | 6D | 2065  | IWB2065  | BobWhite_c27145_731          | 110.8 |
| 7398 | 6D | 34557 | IWB34557 | IAAV2433                     | 111.1 |
| 7399 | 6D | 48102 | IWB48102 | Kukri_c8698_292              | 111.6 |
| 7400 | 6D | 33813 | IWB33813 | GENE-4178_89                 | 112.5 |
| 7401 | 6D | 34979 | IWB34979 | IAAV5158                     | 114.1 |
| 7402 | 6D | 34586 | IWB34586 | IAAV262                      | 114.1 |
| 7403 | 6D | 12800 | IWB12800 | CAP11_c2649_327              | 114.1 |
| 7404 | 6D | 20283 | IWB20283 | Ex_c25390_395                | 114.1 |
| 7405 | 6D | 74822 | IWB74822 | tplb0045d23_567              | 114.1 |
| 7406 | 6D | 79162 | IWA5180  | wsnp_Ex_rep_c110800_93013978 | 114.1 |
| 7407 | 6D | 62192 | IWB62192 | RAC875_rep_c113188_81        | 114.1 |
| 7408 | 6D | 14382 | IWB14382 | CAP7_rep_c12716_77           | 114.1 |
| 7409 | 6D | 20284 | IWB20284 | Ex_c25390_404                | 114.1 |
| 7410 | 6D | 77424 | IWA2965  | wsnp_Ex_c25390_34654575      | 114.1 |
| 7411 | 6D | 27423 | IWB27423 | Excalibur_c53816_233         | 114.1 |
| 7412 | 6D | 54104 | IWB54104 | RAC875_c15525_271            | 114.1 |
| 7413 | 6D | 34312 | IWB34312 | IAAV1012                     | 114.4 |
| 7414 | 6D | 24926 | IWB24926 | Excalibur_c30035_368         | 114.4 |
| 7415 | 6D | 21244 | IWB21244 | Ex_c7086_154                 | 114.7 |
| 7416 | 6D | 34805 | IWB34805 | IAAV3944                     | 114.7 |
| 7417 | 6D | 29056 | IWB29056 | Excalibur_c83056_83          | 114.7 |
| 7418 | 6D | 27630 | IWB27630 | Excalibur_c5612_711          | 114.7 |
| 7419 | 6D | 26363 | IWB26363 | Excalibur_c4261_1098         | 114.7 |
| 7420 | 6D | 28990 | IWB28990 | Excalibur_c8134_1319         | 115.2 |
| 7421 | 6D | 20472 | IWB20472 | Ex_c31468_598                | 115.2 |
| 7422 | 6D | 76234 | IWA1406  | wsnp_Ex_c10910_17729008      | 115.5 |
| 7423 | 6D | 15598 | IWB15598 | D_contig10996_530            | 116.0 |
| 7424 | 6D | 22598 | IWB22598 | Excalibur_c15309_646         | 116.0 |
| 7425 | 6D | 53907 | IWB53907 | RAC875_c14354_907            | 116.3 |
| 7426 | 6D | 53908 | IWB53908 | RAC875_c14354_934            | 116.3 |
| 7427 | 6D | 80533 | IWA7091  | wsnp_Ku_c4603_8305972        | 116.6 |
| 7428 | 6D | 76505 | IWA1741  | wsnp_Ex_c13188_20825019      | 116.9 |
| 7429 | 6D | 30619 | IWB30619 | Excalibur_rep_c113131_624    | 117.1 |
| 7430 | 6D | 65984 | IWB65984 | TA005561-0543                | 117.1 |
| 7431 | 6D | 80827 | IWA7490  | wsnp_Ku_rep_c71225_70941765  | 117.1 |
| 7432 | 6D | 78163 | IWA3911  | wsnp_Ex_c4480_8055475        | 117.1 |
| 7433 | 6D | 78164 | IWA3912  | wsnp_Ex_c4480_8056013        | 117.1 |
| 7434 | 6D | 78166 | IWA3914  | wsnp_Ex_c4480_8057184        | 117.1 |
| 7435 | 6D | 40695 | IWB40695 | Kukri_c11902_580             | 117.1 |
| 7436 | 6D | 23673 | IWB23673 | Excalibur_c21688_724         | 117.1 |
| 7437 | 6D | 78162 | IWA3910  | wsnp_Ex_c4480_8055163        | 117.4 |
| 7438 | 6D | 1134  | IWB1134  | BobWhite_c18136_441          | 117.4 |
| 7439 | 6D | 49920 | IWB49920 | Kukri_rep_c69637_318         | 117.4 |
| 7440 | 6D | 78165 | IWA3913  | wsnp_Ex_c4480_8056354        | 117.4 |
| 7441 | 6D | 11495 | IWB11495 | BS00087343_51                | 117.7 |
| 7442 | 6D | 11494 | IWB11494 | BS00087334_51                | 117.7 |
| 7443 | 6D | 4005  | IWB4005  | BobWhite_c5847_919           | 117.7 |
| 7444 | 6D | 50622 | IWB50622 | Kukri_s109823_59             | 117.7 |
| 7445 | 6D | 57502 | IWB57502 | RAC875_c3928_422             | 118.0 |
| 7446 | 6D | 51207 | IWB51207 | Ra_c16172_309                | 118.2 |
| 7447 | 6D | 36074 | IWB36074 | IACX5958                     | 118.2 |

|      |    |       |          |                              |       |
|------|----|-------|----------|------------------------------|-------|
| 7448 | 6D | 66694 | IWB66694 | Tdurum_contig10729_502       | 121.4 |
| 7449 | 6D | 58585 | IWB58585 | RAC875_c49751_75             | 121.4 |
| 7450 | 6D | 55265 | IWB55265 | RAC875_c21938_1270           | 121.4 |
| 7451 | 6D | 32150 | IWB32150 | GENE-0925_515                | 121.7 |
| 7452 | 6D | 41219 | IWB41219 | Kukri_c14511_217             | 121.7 |
| 7453 | 6D | 77726 | IWA3350  | wsnp_Ex_c31584_40355363      | 121.7 |
| 7454 | 6D | 505   | IWB505   | BobWhite_c13435_700          | 121.7 |
| 7455 | 6D | 13935 | IWB13935 | CAP7_c2559_543               | 121.7 |
| 7456 | 6D | 16198 | IWB16198 | D_contig24848_84             | 122.3 |
| 7457 | 6D | 75474 | IWA203   | wsnp_BE471213D_Ta_2_1        | 122.3 |
| 7458 | 6D | 10505 | IWB10505 | BS00070856_51                | 122.3 |
| 7459 | 6D | 64010 | IWB64010 | RFL_Contig2615_982           | 122.3 |
| 7460 | 7A | 33906 | IWB33906 | GENE-4335_35                 | 0.0   |
| 7461 | 7A | 9323  | IWB9323  | BS00064576_51                | 0.3   |
| 7462 | 7A | 11368 | IWB11368 | BS00084477_51                | 0.5   |
| 7463 | 7A | 44621 | IWB44621 | Kukri_c36885_58              | 7.8   |
| 7464 | 7A | 67845 | IWB67845 | Tdurum_contig13048_89        | 9.5   |
| 7465 | 7A | 40741 | IWB40741 | Kukri_c12113_837             | 9.5   |
| 7466 | 7A | 38593 | IWB38593 | Ku_c1738_2299                | 9.5   |
| 7467 | 7A | 47685 | IWB47685 | Kukri_c76470_79              | 9.5   |
| 7468 | 7A | 2606  | IWB2606  | BobWhite_c33103_439          | 9.5   |
| 7469 | 7A | 72404 | IWB72404 | Tdurum_contig54860_525       | 9.5   |
| 7470 | 7A | 43608 | IWB43608 | Kukri_c28866_183             | 9.5   |
| 7471 | 7A | 54330 | IWB54330 | RAC875_c16644_1722           | 9.5   |
| 7472 | 7A | 54331 | IWB54331 | RAC875_c16644_491            | 9.5   |
| 7473 | 7A | 2607  | IWB2607  | BobWhite_c33103_476          | 9.5   |
| 7474 | 7A | 65328 | IWB65328 | TA001002-0479                | 9.5   |
| 7475 | 7A | 24232 | IWB24232 | Excalibur_c24882_848         | 9.5   |
| 7476 | 7A | 67844 | IWB67844 | Tdurum_contig13048_450       | 9.5   |
| 7477 | 7A | 54421 | IWB54421 | RAC875_c17185_90             | 9.5   |
| 7478 | 7A | 55129 | IWB55129 | RAC875_c21119_305            | 9.5   |
| 7479 | 7A | 12708 | IWB12708 | CAP11_c1661_59               | 9.5   |
| 7480 | 7A | 11337 | IWB11337 | BS00084039_51                | 9.5   |
| 7481 | 7A | 11336 | IWB11336 | BS00084036_51                | 9.5   |
| 7482 | 7A | 7062  | IWB7062  | BS00022404_51                | 9.5   |
| 7483 | 7A | 2340  | IWB2340  | BobWhite_c30138_69           | 9.5   |
| 7484 | 7A | 65964 | IWB65964 | TA005348-0816                | 9.5   |
| 7485 | 7A | 73889 | IWB73889 | Tdurum_contig93663_457       | 9.5   |
| 7486 | 7A | 41940 | IWB41940 | Kukri_c1831_1243             | 9.5   |
| 7487 | 7A | 73823 | IWB73823 | Tdurum_contig92906_272       | 9.5   |
| 7488 | 7A | 32052 | IWB32052 | GENE-0689_601                | 9.8   |
| 7489 | 7A | 6597  | IWB6597  | BS00014126_51                | 11.8  |
| 7490 | 7A | 61248 | IWB61248 | RAC875_c98675_226            | 11.8  |
| 7491 | 7A | 10181 | IWB10181 | BS00067904_51                | 12.9  |
| 7492 | 7A | 11150 | IWB11150 | BS00080831_51                | 13.2  |
| 7493 | 7A | 6096  | IWB6096  | BS00009677_51                | 13.2  |
| 7494 | 7A | 27935 | IWB27935 | Excalibur_c60134_182         | 14.3  |
| 7495 | 7A | 81220 | IWA8032  | wsnp_Ra_c63822_63288359      | 14.3  |
| 7496 | 7A | 59812 | IWB59812 | RAC875_c63822_185            | 14.3  |
| 7497 | 7A | 73682 | IWB73682 | Tdurum_contig85217_206       | 19.8  |
| 7498 | 7A | 75917 | IWA834   | wsnp_CAP11_rep_c4066_1921894 | 21.8  |
| 7499 | 7A | 44377 | IWB44377 | Kukri_c34887_734             | 22.1  |
| 7500 | 7A | 65343 | IWB65343 | TA001117-0895                | 22.1  |
| 7501 | 7A | 59995 | IWB59995 | RAC875_c6600_716             | 22.4  |

|      |    |       |          |                           |      |
|------|----|-------|----------|---------------------------|------|
| 7502 | 7A | 10757 | IWB10757 | BS00074731_51             | 23.2 |
| 7503 | 7A | 12296 | IWB12296 | BS00106739_51             | 23.2 |
| 7504 | 7A | 7349  | IWB7349  | BS00022970_51             | 23.2 |
| 7505 | 7A | 7431  | IWB7431  | BS00023117_51             | 23.2 |
| 7506 | 7A | 24322 | IWB24322 | Excalibur_c25471_225      | 23.2 |
| 7507 | 7A | 30960 | IWB30960 | Excalibur_rep_c68458_1536 | 24.9 |
| 7508 | 7A | 29333 | IWB29333 | Excalibur_c9109_428       | 26.6 |
| 7509 | 7A | 31010 | IWB31010 | Excalibur_rep_c68955_286  | 26.9 |
| 7510 | 7A | 71609 | IWB71609 | Tdurum_contig45437_1667   | 28.6 |
| 7511 | 7A | 9397  | IWB9397  | BS00064892_51             | 30.0 |
| 7512 | 7A | 67721 | IWB67721 | Tdurum_contig12722_779    | 30.0 |
| 7513 | 7A | 71683 | IWB71683 | Tdurum_contig46393_3115   | 30.0 |
| 7514 | 7A | 65110 | IWB65110 | RFL_Contig5743_2000       | 30.0 |
| 7515 | 7A | 10168 | IWB10168 | BS00067845_51             | 30.0 |
| 7516 | 7A | 9078  | IWB9078  | BS00063549_51             | 30.0 |
| 7517 | 7A | 75977 | IWA954   | wsnp_CAP12_c3056_1439567  | 30.5 |
| 7518 | 7A | 74238 | IWB74238 | tplb0025h15_643           | 30.8 |
| 7519 | 7A | 207   | IWB207   | BobWhite_c11354_376       | 30.8 |
| 7520 | 7A | 55491 | IWB55491 | RAC875_c23339_236         | 30.8 |
| 7521 | 7A | 73582 | IWB73582 | Tdurum_contig82572_327    | 32.4 |
| 7522 | 7A | 73583 | IWB73583 | Tdurum_contig82572_392    | 32.4 |
| 7523 | 7A | 68730 | IWB68730 | Tdurum_contig18446_225    | 32.4 |
| 7524 | 7A | 73584 | IWB73584 | Tdurum_contig82572_442    | 32.4 |
| 7525 | 7A | 73581 | IWB73581 | Tdurum_contig82572_293    | 32.4 |
| 7526 | 7A | 73571 | IWB73571 | Tdurum_contig82438_73     | 34.1 |
| 7527 | 7A | 59817 | IWB59817 | RAC875_c63889_486         | 34.1 |
| 7528 | 7A | 73570 | IWB73570 | Tdurum_contig82438_136    | 34.1 |
| 7529 | 7A | 12626 | IWB12626 | BS00111112_51             | 43.2 |
| 7530 | 7A | 40574 | IWB40574 | Kukri_c11325_337          | 43.2 |
| 7531 | 7A | 3609  | IWB3609  | BobWhite_c47709_141       | 43.2 |
| 7532 | 7A | 67315 | IWB67315 | Tdurum_contig11827_216    | 43.2 |
| 7533 | 7A | 49383 | IWB49383 | Kukri_rep_c109098_132     | 43.2 |
| 7534 | 7A | 67316 | IWB67316 | Tdurum_contig11827_678    | 43.2 |
| 7535 | 7A | 78046 | IWA3760  | wsnp_Ex_c41150_48040078   | 51.1 |
| 7536 | 7A | 52818 | IWB52818 | Ra_c9427_300              | 51.1 |
| 7537 | 7A | 56953 | IWB56953 | RAC875_c3450_836          | 51.1 |
| 7538 | 7A | 6927  | IWB6927  | BS00022145_51             | 53.9 |
| 7539 | 7A | 20735 | IWB20735 | Ex_c4463_146              | 53.9 |
| 7540 | 7A | 10719 | IWB10719 | BS00074230_51             | 53.9 |
| 7541 | 7A | 11091 | IWB11091 | BS00079614_51             | 55.0 |
| 7542 | 7A | 48426 | IWB48426 | Kukri_c96054_123          | 55.8 |
| 7543 | 7A | 78530 | IWA4386  | wsnp_Ex_c5939_10417052    | 55.8 |
| 7544 | 7A | 46670 | IWB46670 | Kukri_c5757_530           | 56.1 |
| 7545 | 7A | 7985  | IWB7985  | BS00034689_51             | 56.6 |
| 7546 | 7A | 8234  | IWB8234  | BS00040600_51             | 56.6 |
| 7547 | 7A | 80621 | IWA7205  | wsnp_Ku_c6065_10682531    | 56.6 |
| 7548 | 7A | 8235  | IWB8235  | BS00040601_51             | 56.6 |
| 7549 | 7A | 34025 | IWB34025 | GENE-4587_50              | 56.6 |
| 7550 | 7A | 25357 | IWB25357 | Excalibur_c33589_373      | 56.6 |
| 7551 | 7A | 60588 | IWB60588 | RAC875_c7988_1588         | 56.6 |
| 7552 | 7A | 52939 | IWB52939 | RAC875_c101928_381        | 56.6 |
| 7553 | 7A | 12628 | IWB12628 | BS00111120_51             | 57.1 |
| 7554 | 7A | 72818 | IWB72818 | Tdurum_contig61653_948    | 57.1 |
| 7555 | 7A | 7104  | IWB7104  | BS00022475_51             | 57.7 |

|      |    |       |          |                             |      |
|------|----|-------|----------|-----------------------------|------|
| 7556 | 7A | 25263 | IWB25263 | Excalibur_c32859_652        | 58.2 |
| 7557 | 7A | 11775 | IWB11775 | BS00092805_51               | 61.5 |
| 7558 | 7A | 10156 | IWB10156 | BS00067808_51               | 61.8 |
| 7559 | 7A | 12099 | IWB12099 | BS00099876_51               | 61.8 |
| 7560 | 7A | 18841 | IWB18841 | D_GCE8AKX01EG53N_294        | 61.8 |
| 7561 | 7A | 9633  | IWB9633  | BS00065789_51               | 62.0 |
| 7562 | 7A | 75548 | IWA305   | wsnp_BE498209A_Ta_2_1       | 62.3 |
| 7563 | 7A | 40447 | IWB40447 | Kukri_c108278_520           | 64.0 |
| 7564 | 7A | 76245 | IWA1418  | wsnp_Ex_c10988_17836981     | 64.0 |
| 7565 | 7A | 39180 | IWB39180 | Ku_c3251_1103               | 64.0 |
| 7566 | 7A | 62936 | IWB62936 | RAC875_rep_c73101_932       | 64.0 |
| 7567 | 7A | 69646 | IWB69646 | Tdurum_contig28838_226      | 64.0 |
| 7568 | 7A | 51943 | IWB51943 | Ra_c3705_2101               | 64.0 |
| 7569 | 7A | 11089 | IWB11089 | BS00079591_51               | 64.0 |
| 7570 | 7A | 9983  | IWB9983  | BS00067200_51               | 64.0 |
| 7571 | 7A | 72880 | IWB72880 | Tdurum_contig62237_531      | 64.0 |
| 7572 | 7A | 34519 | IWB34519 | IAAV222                     | 64.0 |
| 7573 | 7A | 5607  | IWB5607  | BobWhite_rep_c66337_650     | 64.0 |
| 7574 | 7A | 52367 | IWB52367 | Ra_c64159_441               | 64.0 |
| 7575 | 7A | 45583 | IWB45583 | Kukri_c45895_132            | 64.0 |
| 7576 | 7A | 28701 | IWB28701 | Excalibur_c7415_148         | 64.0 |
| 7577 | 7A | 81046 | IWA7792  | wsnp_Ra_c25918_35485125     | 64.0 |
| 7578 | 7A | 77002 | IWA2381  | wsnp_Ex_c19198_28115812     | 64.0 |
| 7579 | 7A | 60298 | IWB60298 | RAC875_c7138_264            | 64.0 |
| 7580 | 7A | 59874 | IWB59874 | RAC875_c64450_145           | 64.0 |
| 7581 | 7A | 35503 | IWB35503 | IAAV8611                    | 64.0 |
| 7582 | 7A | 23482 | IWB23482 | Excalibur_c20450_230        | 64.0 |
| 7583 | 7A | 80998 | IWA7724  | wsnp_Ra_c20371_29633358     | 64.0 |
| 7584 | 7A | 79882 | IWA6183  | wsnp_JD_c7987_9038994       | 64.0 |
| 7585 | 7A | 59583 | IWB59583 | RAC875_c61210_285           | 64.0 |
| 7586 | 7A | 52438 | IWB52438 | Ra_c6845_1501               | 64.0 |
| 7587 | 7A | 50244 | IWB50244 | Kukri_rep_c73018_94         | 64.0 |
| 7588 | 7A | 20679 | IWB20679 | Ex_c41740_166               | 64.0 |
| 7589 | 7A | 39122 | IWB39122 | Ku_c307_1994                | 64.0 |
| 7590 | 7A | 19819 | IWB19819 | Ex_c13716_356               | 64.0 |
| 7591 | 7A | 10939 | IWB10939 | BS00077560_51               | 64.0 |
| 7592 | 7A | 9156  | IWB9156  | BS00063933_51               | 64.0 |
| 7593 | 7A | 9049  | IWB9049  | BS00063383_51               | 64.0 |
| 7594 | 7A | 75892 | IWA788   | wsnp_CAP11_c592_400447      | 64.0 |
| 7595 | 7A | 70239 | IWB70239 | Tdurum_contig31407_132      | 64.0 |
| 7596 | 7A | 65015 | IWB65015 | RFL_Contig5478_741          | 64.0 |
| 7597 | 7A | 52898 | IWB52898 | RAC875_c10054_2066          | 64.0 |
| 7598 | 7A | 81319 | IWA8171  | wsnp_Ra_rep_c70756_68674560 | 64.0 |
| 7599 | 7A | 9602  | IWB9602  | BS00065647_51               | 64.0 |
| 7600 | 7A | 67471 | IWB67471 | Tdurum_contig12156_160      | 64.0 |
| 7601 | 7A | 9702  | IWB9702  | BS00066045_51               | 64.0 |
| 7602 | 7A | 36723 | IWB36723 | Jagger_c7141_114            | 64.0 |
| 7603 | 7A | 80818 | IWA7472  | wsnp_Ku_rep_c70256_69818445 | 64.0 |
| 7604 | 7A | 6806  | IWB6806  | BS00021936_51               | 64.0 |
| 7605 | 7A | 38806 | IWB38806 | Ku_c2205_1317               | 64.0 |
| 7606 | 7A | 8022  | IWB8022  | BS00035678_51               | 64.0 |
| 7607 | 7A | 69937 | IWB69937 | Tdurum_contig29988_148      | 64.3 |
| 7608 | 7A | 8935  | IWB8935  | BS00062829_51               | 68.1 |
| 7609 | 7A | 65698 | IWB65698 | TA003505-0833               | 68.1 |

|      |    |       |          |                             |      |
|------|----|-------|----------|-----------------------------|------|
| 7610 | 7A | 3398  | IWB3398  | BobWhite_c44762_182         | 68.9 |
| 7611 | 7A | 8256  | IWB8256  | BS00040992_51               | 69.7 |
| 7612 | 7A | 81373 | IWA8258  | wsnp_RFL_Contig1800_931423  | 69.7 |
| 7613 | 7A | 13779 | IWB13779 | CAP7_c12333_392             | 69.7 |
| 7614 | 7A | 5246  | IWB5246  | BobWhite_rep_c60436_231     | 69.7 |
| 7615 | 7A | 77513 | IWA3082  | wsnp_Ex_c26923_36144147     | 70.0 |
| 7616 | 7A | 53344 | IWB53344 | RAC875_c114809_130          | 70.0 |
| 7617 | 7A | 35428 | IWB35428 | IAAV8081                    | 70.0 |
| 7618 | 7A | 32596 | IWB32596 | GENE-1685_148               | 70.0 |
| 7619 | 7A | 13686 | IWB13686 | CAP7_c10038_214             | 70.0 |
| 7620 | 7A | 23998 | IWB23998 | Excalibur_c2359_1511        | 70.2 |
| 7621 | 7A | 81030 | IWA7770  | wsnp_Ra_c23285_32795964     | 70.2 |
| 7622 | 7A | 80532 | IWA7089  | wsnp_Ku_c4591_8286583       | 70.2 |
| 7623 | 7A | 80531 | IWA7088  | wsnp_Ku_c4591_8286024       | 70.2 |
| 7624 | 7A | 27404 | IWB27404 | Excalibur_c53632_204        | 70.2 |
| 7625 | 7A | 46770 | IWB46770 | Kukri_c58950_69             | 70.2 |
| 7626 | 7A | 72485 | IWB72485 | Tdurum_contig56144_277      | 70.2 |
| 7627 | 7A | 79009 | IWA4996  | wsnp_Ex_c9982_16429661      | 70.2 |
| 7628 | 7A | 72620 | IWB72620 | Tdurum_contig58312_119      | 70.2 |
| 7629 | 7A | 72486 | IWB72486 | Tdurum_contig56144_369      | 70.2 |
| 7630 | 7A | 75646 | IWA448   | wsnp_BF293181A_Ta_2_4       | 70.2 |
| 7631 | 7A | 58340 | IWB58340 | RAC875_c4732_1672           | 70.2 |
| 7632 | 7A | 63636 | IWB63636 | RFL_Contig1433_929          | 70.5 |
| 7633 | 7A | 21330 | IWB21330 | Ex_c7833_486                | 70.8 |
| 7634 | 7A | 8790  | IWB8790  | BS00059928_51               | 71.1 |
| 7635 | 7A | 76717 | IWA2011  | wsnp_Ex_c15341_23592075     | 76.1 |
| 7636 | 7A | 78452 | IWA4288  | wsnp_Ex_c5608_9867710       | 76.1 |
| 7637 | 7A | 11795 | IWB11795 | BS00093156_51               | 76.1 |
| 7638 | 7A | 76718 | IWA2012  | wsnp_Ex_c15341_23592177     | 76.1 |
| 7639 | 7A | 79767 | IWA6004  | wsnp_JD_c3225_4227048       | 76.7 |
| 7640 | 7A | 8359  | IWB8359  | BS00044234_51               | 76.7 |
| 7641 | 7A | 10547 | IWB10547 | BS00071424_51               | 76.7 |
| 7642 | 7A | 72494 | IWB72494 | Tdurum_contig56175_791      | 77.0 |
| 7643 | 7A | 4809  | IWB4809  | BobWhite_rep_c49790_351     | 77.0 |
| 7644 | 7A | 9062  | IWB9062  | BS00063458_51               | 78.4 |
| 7645 | 7A | 9063  | IWB9063  | BS00063460_51               | 78.4 |
| 7646 | 7A | 14235 | IWB14235 | CAP7_c7296_88               | 78.4 |
| 7647 | 7A | 4764  | IWB4764  | BobWhite_rep_c49367_405     | 78.6 |
| 7648 | 7A | 10968 | IWB10968 | BS00077891_51               | 80.3 |
| 7649 | 7A | 6963  | IWB6963  | BS00022202_51               | 80.3 |
| 7650 | 7A | 52737 | IWB52737 | Ra_c8394_1381               | 80.3 |
| 7651 | 7A | 42182 | IWB42182 | Kukri_c19696_60             | 81.7 |
| 7652 | 7A | 57103 | IWB57103 | RAC875_c35723_106           | 83.1 |
| 7653 | 7A | 9769  | IWB9769  | BS00066295_51               | 83.1 |
| 7654 | 7A | 73704 | IWB73704 | Tdurum_contig8615_230       | 83.1 |
| 7655 | 7A | 23775 | IWB23775 | Excalibur_c22219_254        | 83.1 |
| 7656 | 7A | 11812 | IWB11812 | BS00093512_51               | 83.1 |
| 7657 | 7A | 77291 | IWA2776  | wsnp_Ex_c23102_32328852     | 83.1 |
| 7658 | 7A | 77290 | IWA2775  | wsnp_Ex_c23102_32328851     | 83.1 |
| 7659 | 7A | 72845 | IWB72845 | Tdurum_contig61966_1069     | 83.1 |
| 7660 | 7A | 75768 | IWA614   | wsnp_BQ160404A_Ta_1_1       | 83.4 |
| 7661 | 7A | 79403 | IWA5489  | wsnp_Ex_rep_c68047_66792559 | 83.7 |
| 7662 | 7A | 50294 | IWB50294 | Kukri_rep_c74538_62         | 83.7 |
| 7663 | 7A | 73139 | IWB73139 | Tdurum_contig69067_405      | 83.7 |

|      |    |       |          |                             |       |
|------|----|-------|----------|-----------------------------|-------|
| 7664 | 7A | 71382 | IWB71382 | Tdurum_contig42954_1081     | 83.7  |
| 7665 | 7A | 26183 | IWB26183 | Excalibur_c40881_182        | 85.4  |
| 7666 | 7A | 10044 | IWB10044 | BS00067425_51               | 86.6  |
| 7667 | 7A | 59224 | IWB59224 | RAC875_c56692_170           | 86.6  |
| 7668 | 7A | 778   | IWB778   | BobWhite_c15352_394         | 86.6  |
| 7669 | 7A | 35291 | IWB35291 | IAAV7117                    | 86.6  |
| 7670 | 7A | 10552 | IWB10552 | BS00071478_51               | 86.6  |
| 7671 | 7A | 11584 | IWB11584 | BS00088825_51               | 86.6  |
| 7672 | 7A | 6690  | IWB6690  | BS00021261_51               | 86.6  |
| 7673 | 7A | 10093 | IWB10093 | BS00067610_51               | 86.6  |
| 7674 | 7A | 57762 | IWB57762 | RAC875_c41659_794           | 86.6  |
| 7675 | 7A | 335   | IWB335   | BobWhite_c12302_368         | 87.1  |
| 7676 | 7A | 6138  | IWB6138  | BS00009926_51               | 87.1  |
| 7677 | 7A | 712   | IWB712   | BobWhite_c149_1839          | 87.1  |
| 7678 | 7A | 21786 | IWB21786 | Excalibur_c11047_424        | 87.1  |
| 7679 | 7A | 21785 | IWB21785 | Excalibur_c11047_160        | 87.1  |
| 7680 | 7A | 76490 | IWA1725  | wsnp_Ex_c1309_2503093       | 87.1  |
| 7681 | 7A | 71670 | IWB71670 | Tdurum_contig46334_832      | 87.1  |
| 7682 | 7A | 57246 | IWB57246 | RAC875_c37085_317           | 87.1  |
| 7683 | 7A | 79667 | IWA5852  | wsnp_JD_c149_238783         | 87.1  |
| 7684 | 7A | 80496 | IWA7046  | wsnp_Ku_c42539_50247426     | 87.1  |
| 7685 | 7A | 80495 | IWA7045  | wsnp_Ku_c42539_50247333     | 87.1  |
| 7686 | 7A | 79628 | IWA5790  | wsnp_JD_c1201_1745713       | 87.4  |
| 7687 | 7A | 53267 | IWB53267 | RAC875_c1115_341            | 87.7  |
| 7688 | 7A | 51129 | IWB51129 | Ra_c14761_1468              | 87.7  |
| 7689 | 7A | 713   | IWB713   | BobWhite_c149_3064          | 87.7  |
| 7690 | 7A | 78944 | IWA4910  | wsnp_Ex_c9428_15641609      | 88.2  |
| 7691 | 7A | 78945 | IWA4911  | wsnp_Ex_c9428_15641639      | 88.2  |
| 7692 | 7A | 13913 | IWB13913 | CAP7_c2350_105              | 88.8  |
| 7693 | 7A | 29518 | IWB29518 | Excalibur_c95707_285        | 89.1  |
| 7694 | 7A | 79705 | IWA5912  | wsnp_JD_c20555_18262260     | 89.1  |
| 7695 | 7A | 79706 | IWA5913  | wsnp_JD_c20555_18262317     | 89.1  |
| 7696 | 7A | 6693  | IWB6693  | BS00021657_51               | 89.1  |
| 7697 | 7A | 58299 | IWB58299 | RAC875_c46980_148           | 90.5  |
| 7698 | 7A | 45057 | IWB45057 | Kukri_c40735_318            | 95.9  |
| 7699 | 7A | 81398 | IWA8297  | wsnp_RFL_Contig2136_1423367 | 95.9  |
| 7700 | 7A | 27037 | IWB27037 | Excalibur_c49272_174        | 96.2  |
| 7701 | 7A | 45565 | IWB45565 | Kukri_c45763_319            | 99.8  |
| 7702 | 7A | 41336 | IWB41336 | Kukri_c15151_249            | 99.8  |
| 7703 | 7A | 44281 | IWB44281 | Kukri_c34147_152            | 99.8  |
| 7704 | 7A | 78598 | IWA4483  | wsnp_Ex_c6354_11053460      | 100.9 |
| 7705 | 7A | 54820 | IWB54820 | RAC875_c19332_645           | 100.9 |
| 7706 | 7A | 78378 | IWA4187  | wsnp_Ex_c53442_56678505     | 100.9 |
| 7707 | 7A | 70291 | IWB70291 | Tdurum_contig31699_276      | 106.6 |
| 7708 | 7A | 70292 | IWB70292 | Tdurum_contig31699_300      | 106.6 |
| 7709 | 7A | 44026 | IWB44026 | Kukri_c31824_636            | 106.6 |
| 7710 | 7A | 12038 | IWB12038 | BS00098482_51               | 108.0 |
| 7711 | 7A | 79006 | IWA4993  | wsnp_Ex_c9971_16412615      | 108.0 |
| 7712 | 7A | 79005 | IWA4992  | wsnp_Ex_c9971_16412345      | 108.0 |
| 7713 | 7A | 80144 | IWA6576  | wsnp_Ku_c16022_24798741     | 128.5 |
| 7714 | 7A | 10682 | IWB10682 | BS00073644_51               | 129.9 |
| 7715 | 7A | 7367  | IWB7367  | BS00023003_51               | 129.9 |
| 7716 | 7A | 8841  | IWB8841  | BS00061593_51               | 130.5 |
| 7717 | 7A | 80464 | IWA7005  | wsnp_Ku_c3929_7189422       | 130.5 |

|      |    |       |          |                             |       |
|------|----|-------|----------|-----------------------------|-------|
| 7718 | 7A | 79701 | IWA5904  | wsnp_JD_c19925_17854742     | 130.5 |
| 7719 | 7A | 6923  | IWB6923  | BS00022137_51               | 130.5 |
| 7720 | 7A | 6675  | IWB6675  | BS00020236_51               | 130.5 |
| 7721 | 7A | 9244  | IWB9244  | BS00064302_51               | 130.7 |
| 7722 | 7A | 6132  | IWB6132  | BS00009886_51               | 131.0 |
| 7723 | 7A | 36289 | IWB36289 | IACX8328                    | 131.0 |
| 7724 | 7A | 41099 | IWB41099 | Kukri_c13821_1990           | 131.5 |
| 7725 | 7A | 67930 | IWB67930 | Tdurum_contig13276_115      | 131.5 |
| 7726 | 7A | 41880 | IWB41880 | Kukri_c18055_1740           | 131.5 |
| 7727 | 7A | 29740 | IWB29740 | Excalibur_rep_c101582_828   | 131.5 |
| 7728 | 7A | 73544 | IWB73544 | Tdurum_contig81947_779      | 131.5 |
| 7729 | 7A | 69525 | IWB69525 | Tdurum_contig28435_107      | 131.5 |
| 7730 | 7B | 72316 | IWB72316 | Tdurum_contig5352_556       | 0.0   |
| 7731 | 7B | 70085 | IWB70085 | Tdurum_contig30677_55       | 2.0   |
| 7732 | 7B | 25434 | IWB25434 | Excalibur_c3423_994         | 2.0   |
| 7733 | 7B | 76084 | IWA1181  | wsnp_CAP8_c334_304253       | 2.0   |
| 7734 | 7B | 57207 | IWB57207 | RAC875_c36670_72            | 2.3   |
| 7735 | 7B | 34191 | IWB34191 | GENE-4833_102               | 8.5   |
| 7736 | 7B | 35038 | IWB35038 | IAAV5530                    | 9.6   |
| 7737 | 7B | 76049 | IWA1089  | wsnp_CAP7_c44_26549         | 9.6   |
| 7738 | 7B | 76102 | IWA1220  | wsnp_CAP8_rep_c3687_1819173 | 11.4  |
| 7739 | 7B | 26212 | IWB26212 | Excalibur_c41298_459        | 11.6  |
| 7740 | 7B | 65586 | IWB65586 | TA002655-1964               | 11.6  |
| 7741 | 7B | 12630 | IWB12630 | BS00111144_51               | 11.9  |
| 7742 | 7B | 35941 | IWB35941 | IACX3991                    | 13.3  |
| 7743 | 7B | 6883  | IWB6883  | BS00022056_51               | 13.3  |
| 7744 | 7B | 7029  | IWB7029  | BS00022326_51               | 13.3  |
| 7745 | 7B | 53146 | IWB53146 | RAC875_c10672_440           | 14.4  |
| 7746 | 7B | 36633 | IWB36633 | Jagger_c5321_98             | 14.7  |
| 7747 | 7B | 39492 | IWB39492 | Ku_c46689_1653              | 14.7  |
| 7748 | 7B | 8652  | IWB8652  | BS00054881_51               | 14.7  |
| 7749 | 7B | 34205 | IWB34205 | GENE-4862_1104              | 14.7  |
| 7750 | 7B | 34206 | IWB34206 | GENE-4862_674               | 14.7  |
| 7751 | 7B | 75691 | IWA518   | wsnp_BF485380B_Ta_2_1       | 14.7  |
| 7752 | 7B | 34204 | IWB34204 | GENE-4862_1014              | 14.7  |
| 7753 | 7B | 60479 | IWB60479 | RAC875_c77603_334           | 14.7  |
| 7754 | 7B | 36476 | IWB36476 | Jagger_c2161_211            | 14.7  |
| 7755 | 7B | 23883 | IWB23883 | Excalibur_c22903_710        | 14.7  |
| 7756 | 7B | 34207 | IWB34207 | GENE-4862_901               | 14.7  |
| 7757 | 7B | 26214 | IWB26214 | Excalibur_c41318_159        | 14.7  |
| 7758 | 7B | 65888 | IWB65888 | TA004831-0260               | 14.7  |
| 7759 | 7B | 34035 | IWB34035 | GENE-4598_467               | 14.7  |
| 7760 | 7B | 26490 | IWB26490 | Excalibur_c43793_81         | 15.0  |
| 7761 | 7B | 40119 | IWB40119 | Ku_c884_2297                | 15.3  |
| 7762 | 7B | 40120 | IWB40120 | Ku_c884_736                 | 15.3  |
| 7763 | 7B | 78200 | IWA3958  | wsnp_Ex_c46061_51675763     | 15.3  |
| 7764 | 7B | 48960 | IWB48960 | Kukri_rep_c104213_234       | 15.3  |
| 7765 | 7B | 80382 | IWA6901  | wsnp_Ku_c31419_41152151     | 15.3  |
| 7766 | 7B | 71429 | IWB71429 | Tdurum_contig43523_1458     | 15.3  |
| 7767 | 7B | 42527 | IWB42527 | Kukri_c21624_91             | 15.3  |
| 7768 | 7B | 79459 | IWA5565  | wsnp_Ex_rep_c68815_67687712 | 15.3  |
| 7769 | 7B | 50233 | IWB50233 | Kukri_rep_c72909_657        | 15.3  |
| 7770 | 7B | 55563 | IWB55563 | RAC875_c23774_595           | 15.3  |
| 7771 | 7B | 66897 | IWB66897 | Tdurum_contig11028_398      | 15.3  |



|      |    |       |          |                         |      |
|------|----|-------|----------|-------------------------|------|
| 7772 | 7B | 66896 | IWB66896 | Tdurum_contig11028_236  | 15.3 |
| 7773 | 7B | 64830 | IWB64830 | RFL_Contig492_751       | 15.3 |
| 7774 | 7B | 41986 | IWB41986 | Kukri_c18530_1054       | 15.3 |
| 7775 | 7B | 78654 | IWA4549  | wsnp_Ex_c6590_11419735  | 15.3 |
| 7776 | 7B | 73519 | IWB73519 | Tdurum_contig81683_217  | 15.3 |
| 7777 | 7B | 66898 | IWB66898 | Tdurum_contig11028_533  | 15.3 |
| 7778 | 7B | 38023 | IWB38023 | Ku_c10026_349           | 15.3 |
| 7779 | 7B | 36099 | IWB36099 | IACX6036                | 15.3 |
| 7780 | 7B | 8019  | IWB8019  | BS00035630_51           | 15.3 |
| 7781 | 7B | 71728 | IWB71728 | Tdurum_contig46877_173  | 15.3 |
| 7782 | 7B | 44432 | IWB44432 | Kukri_c35354_321        | 15.3 |
| 7783 | 7B | 36813 | IWB36813 | Jagger_c9314_100        | 15.3 |
| 7784 | 7B | 54370 | IWB54370 | RAC875_c16839_188       | 15.3 |
| 7785 | 7B | 72575 | IWB72575 | Tdurum_contig57370_318  | 15.5 |
| 7786 | 7B | 72576 | IWB72576 | Tdurum_contig57370_82   | 15.5 |
| 7787 | 7B | 44542 | IWB44542 | Kukri_c36225_133        | 15.8 |
| 7788 | 7B | 35528 | IWB35528 | IAAV872                 | 16.4 |
| 7789 | 7B | 34186 | IWB34186 | GENE-4826_641           | 16.4 |
| 7790 | 7B | 56817 | IWB56817 | RAC875_c33179_244       | 16.4 |
| 7791 | 7B | 33909 | IWB33909 | GENE-4337_558           | 16.4 |
| 7792 | 7B | 66826 | IWB66826 | Tdurum_contig10932_375  | 16.4 |
| 7793 | 7B | 6364  | IWB6364  | BS00011186_51           | 16.4 |
| 7794 | 7B | 10705 | IWB10705 | BS00074083_51           | 16.4 |
| 7795 | 7B | 1666  | IWB1666  | BobWhite_c23074_304     | 16.4 |
| 7796 | 7B | 1369  | IWB1369  | BobWhite_c20266_115     | 16.6 |
| 7797 | 7B | 5875  | IWB5875  | BS00003726_51           | 16.9 |
| 7798 | 7B | 11703 | IWB11703 | BS00091302_51           | 16.9 |
| 7799 | 7B | 53206 | IWB53206 | RAC875_c10932_1697      | 16.9 |
| 7800 | 7B | 80706 | IWA7326  | wsnp_Ku_c8497_14429303  | 16.9 |
| 7801 | 7B | 78625 | IWA4516  | wsnp_Ex_c64709_63402325 | 16.9 |
| 7802 | 7B | 60    | IWB60    | BobWhite_c10448_80      | 16.9 |
| 7803 | 7B | 36566 | IWB36566 | Jagger_c3811_65         | 17.2 |
| 7804 | 7B | 34211 | IWB34211 | GENE-4869_117           | 17.8 |
| 7805 | 7B | 65376 | IWB65376 | TA001320-0384           | 18.9 |
| 7806 | 7B | 34143 | IWB34143 | GENE-4750_46            | 18.9 |
| 7807 | 7B | 11385 | IWB11385 | BS00084788_51           | 19.2 |
| 7808 | 7B | 7150  | IWB7150  | BS00022550_51           | 19.2 |
| 7809 | 7B | 33883 | IWB33883 | GENE-4273_67            | 19.2 |
| 7810 | 7B | 7527  | IWB7527  | BS00024215_51           | 19.2 |
| 7811 | 7B | 5739  | IWB5739  | BS00000170_51           | 21.8 |
| 7812 | 7B | 67979 | IWB67979 | Tdurum_contig13431_127  | 21.8 |
| 7813 | 7B | 12657 | IWB12657 | CAP11_c106_97           | 23.5 |
| 7814 | 7B | 78920 | IWA4873  | wsnp_Ex_c908_1754208    | 24.1 |
| 7815 | 7B | 73107 | IWB73107 | Tdurum_contig68347_605  | 24.1 |
| 7816 | 7B | 3531  | IWB3531  | BobWhite_c46772_564     | 24.6 |
| 7817 | 7B | 54284 | IWB54284 | RAC875_c1638_165        | 24.9 |
| 7818 | 7B | 63589 | IWB63589 | RFL_Contig124_558       | 25.7 |
| 7819 | 7B | 69576 | IWB69576 | Tdurum_contig28644_281  | 26.6 |
| 7820 | 7B | 76344 | IWA1543  | wsnp_Ex_c11860_19030807 | 27.4 |
| 7821 | 7B | 34169 | IWB34169 | GENE-4790_279           | 29.4 |
| 7822 | 7B | 33246 | IWB33246 | GENE-3132_118           | 29.7 |
| 7823 | 7B | 35807 | IWB35807 | IACX1871                | 29.7 |
| 7824 | 7B | 26171 | IWB26171 | Excalibur_c40829_188    | 34.2 |
| 7825 | 7B | 24436 | IWB24436 | Excalibur_c26387_87     | 34.2 |

|      |    |       |          |                              |      |
|------|----|-------|----------|------------------------------|------|
| 7826 | 7B | 61728 | IWB61728 | RAC875_rep_c107704_155       | 34.2 |
| 7827 | 7B | 71924 | IWB71924 | Tdurum_contig48847_202       | 34.2 |
| 7828 | 7B | 73909 | IWB73909 | Tdurum_contig94390_406       | 34.2 |
| 7829 | 7B | 71926 | IWB71926 | Tdurum_contig48847_852       | 34.2 |
| 7830 | 7B | 71838 | IWB71838 | Tdurum_contig47735_380       | 34.2 |
| 7831 | 7B | 40982 | IWB40982 | Kukri_c13142_974             | 34.2 |
| 7832 | 7B | 68015 | IWB68015 | Tdurum_contig13565_755       | 34.2 |
| 7833 | 7B | 69050 | IWB69050 | Tdurum_contig25380_205       | 34.2 |
| 7834 | 7B | 58270 | IWB58270 | RAC875_c46662_95             | 34.2 |
| 7835 | 7B | 69052 | IWB69052 | Tdurum_contig25380_69        | 34.2 |
| 7836 | 7B | 72925 | IWB72925 | Tdurum_contig62981_75        | 35.6 |
| 7837 | 7B | 70349 | IWB70349 | Tdurum_contig32378_439       | 40.4 |
| 7838 | 7B | 60292 | IWB60292 | RAC875_c7123_1703            | 42.0 |
| 7839 | 7B | 27833 | IWB27833 | Excalibur_c58742_144         | 42.6 |
| 7840 | 7B | 66025 | IWB66025 | TA005844-0160                | 42.8 |
| 7841 | 7B | 65673 | IWB65673 | TA003316-1486                | 43.6 |
| 7842 | 7B | 55600 | IWB55600 | RAC875_c24101_284            | 45.6 |
| 7843 | 7B | 38052 | IWB38052 | Ku_c10179_1837               | 45.6 |
| 7844 | 7B | 69178 | IWB69178 | Tdurum_contig25773_174       | 45.6 |
| 7845 | 7B | 23685 | IWB23685 | Excalibur_c21739_688         | 45.6 |
| 7846 | 7B | 57705 | IWB57705 | RAC875_c4128_926             | 45.6 |
| 7847 | 7B | 9018  | IWB9018  | BS00063208_51                | 46.5 |
| 7848 | 7B | 7711  | IWB7711  | BS00029287_51                | 47.8 |
| 7849 | 7B | 74015 | IWB74015 | Tdurum_contig97814_355       | 48.7 |
| 7850 | 7B | 80152 | IWA6589  | wsnp_Ku_c16295_25149034      | 50.4 |
| 7851 | 7B | 38566 | IWB38566 | Ku_c16895_793                | 50.4 |
| 7852 | 7B | 80167 | IWA6608  | wsnp_Ku_c16895_25861847      | 50.4 |
| 7853 | 7B | 80151 | IWA6588  | wsnp_Ku_c16295_25148628      | 50.4 |
| 7854 | 7B | 78178 | IWA3928  | wsnp_Ex_c45195_51056617      | 50.4 |
| 7855 | 7B | 76194 | IWA1354  | wsnp_Ex_c10571_17258682      | 50.4 |
| 7856 | 7B | 38567 | IWB38567 | Ku_c16895_803                | 50.4 |
| 7857 | 7B | 9120  | IWB9120  | BS00063744_51                | 50.4 |
| 7858 | 7B | 29268 | IWB29268 | Excalibur_c8931_432          | 50.4 |
| 7859 | 7B | 7682  | IWB7682  | BS00028279_51                | 50.4 |
| 7860 | 7B | 73542 | IWB73542 | Tdurum_contig81911_179       | 51.0 |
| 7861 | 7B | 40924 | IWB40924 | Kukri_c12901_706             | 51.0 |
| 7862 | 7B | 58468 | IWB58468 | RAC875_c48766_224            | 51.3 |
| 7863 | 7B | 69489 | IWB69489 | Tdurum_contig28304_335       | 54.8 |
| 7864 | 7B | 9204  | IWB9204  | BS00064146_51                | 54.8 |
| 7865 | 7B | 7643  | IWB7643  | BS00027058_51                | 54.8 |
| 7866 | 7B | 11033 | IWB11033 | BS00078785_51                | 54.8 |
| 7867 | 7B | 7642  | IWB7642  | BS00027054_51                | 54.8 |
| 7868 | 7B | 13136 | IWB13136 | CAP11_rep_c7351_157          | 54.8 |
| 7869 | 7B | 31227 | IWB31227 | Excalibur_rep_c74234_183     | 54.8 |
| 7870 | 7B | 75919 | IWA836   | wsnp_CAP11_rep_c4076_1926235 | 54.8 |
| 7871 | 7B | 7218  | IWB7218  | BS00022700_51                | 54.8 |
| 7872 | 7B | 69481 | IWB69481 | Tdurum_contig28276_849       | 55.6 |
| 7873 | 7B | 70061 | IWB70061 | Tdurum_contig30580_219       | 57.0 |
| 7874 | 7B | 40527 | IWB40527 | Kukri_c11141_203             | 57.8 |
| 7875 | 7B | 41484 | IWB41484 | Kukri_c15912_812             | 58.1 |
| 7876 | 7B | 41485 | IWB41485 | Kukri_c15912_860             | 58.1 |
| 7877 | 7B | 9261  | IWB9261  | BS00064367_51                | 58.7 |
| 7878 | 7B | 35490 | IWB35490 | IAAV8521                     | 58.9 |
| 7879 | 7B | 25127 | IWB25127 | Excalibur_c31707_302         | 59.8 |

|      |    |       |          |                             |      |
|------|----|-------|----------|-----------------------------|------|
| 7880 | 7B | 8451  | IWB8451  | BS00047083_51               | 60.3 |
| 7881 | 7B | 71692 | IWB71692 | Tdurum_contig4658_418       | 60.6 |
| 7882 | 7B | 1121  | IWB1121  | BobWhite_c1802_456          | 60.6 |
| 7883 | 7B | 71691 | IWB71691 | Tdurum_contig4658_346       | 60.6 |
| 7884 | 7B | 9373  | IWB9373  | BS00064808_51               | 60.9 |
| 7885 | 7B | 39661 | IWB39661 | Ku_c5789_663                | 61.4 |
| 7886 | 7B | 23527 | IWB23527 | Excalibur_c2062_383         | 63.1 |
| 7887 | 7B | 54048 | IWB54048 | RAC875_c15057_1050          | 63.4 |
| 7888 | 7B | 726   | IWB726   | BobWhite_c14966_231         | 63.9 |
| 7889 | 7B | 29313 | IWB29313 | Excalibur_c90713_226        | 63.9 |
| 7890 | 7B | 79926 | IWA6246  | wsnp_JD_rep_c48755_32989025 | 67.8 |
| 7891 | 7B | 76866 | IWA2193  | wsnp_Ex_c1721_3261986       | 67.8 |
| 7892 | 7B | 78818 | IWA4749  | wsnp_Ex_c7934_13467335      | 67.8 |
| 7893 | 7B | 72479 | IWB72479 | Tdurum_contig55961_526      | 68.4 |
| 7894 | 7B | 27158 | IWB27158 | Excalibur_c50612_409        | 68.4 |
| 7895 | 7B | 76864 | IWA2191  | wsnp_Ex_c17176_25816766     | 68.4 |
| 7896 | 7B | 49960 | IWB49960 | Kukri_rep_c69900_197        | 68.4 |
| 7897 | 7B | 73409 | IWB73409 | Tdurum_contig77073_193      | 68.4 |
| 7898 | 7B | 47991 | IWB47991 | Kukri_c8405_1394            | 68.4 |
| 7899 | 7B | 52637 | IWB52637 | Ra_c74686_615               | 68.9 |
| 7900 | 7B | 22031 | IWB22031 | Excalibur_c12064_78         | 68.9 |
| 7901 | 7B | 71574 | IWB71574 | Tdurum_contig44948_2175     | 68.9 |
| 7902 | 7B | 31241 | IWB31241 | Excalibur_rep_c75066_126    | 68.9 |
| 7903 | 7B | 48453 | IWB48453 | Kukri_c9683_150             | 68.9 |
| 7904 | 7B | 48454 | IWB48454 | Kukri_c9683_723             | 68.9 |
| 7905 | 7B | 71572 | IWB71572 | Tdurum_contig44948_1809     | 68.9 |
| 7906 | 7B | 31273 | IWB31273 | Excalibur_rep_c77206_397    | 68.9 |
| 7907 | 7B | 37730 | IWB37730 | JD_c6531_201                | 68.9 |
| 7908 | 7B | 71571 | IWB71571 | Tdurum_contig44948_1132     | 68.9 |
| 7909 | 7B | 71573 | IWB71573 | Tdurum_contig44948_1812     | 68.9 |
| 7910 | 7B | 71575 | IWB71575 | Tdurum_contig44948_2237     | 68.9 |
| 7911 | 7B | 59455 | IWB59455 | RAC875_c59682_222           | 68.9 |
| 7912 | 7B | 68494 | IWB68494 | Tdurum_contig16065_567      | 68.9 |
| 7913 | 7B | 63339 | IWB63339 | RAC875_rep_c95897_119       | 68.9 |
| 7914 | 7B | 61547 | IWB61547 | RAC875_rep_c106109_130      | 68.9 |
| 7915 | 7B | 54361 | IWB54361 | RAC875_c1679_539            | 68.9 |
| 7916 | 7B | 34928 | IWB34928 | IAAV4818                    | 68.9 |
| 7917 | 7B | 75419 | IWA130   | wsnp_BE443521B_Ta_2_1       | 68.9 |
| 7918 | 7B | 35376 | IWB35376 | IAAV7708                    | 68.9 |
| 7919 | 7B | 35300 | IWB35300 | IAAV7151                    | 68.9 |
| 7920 | 7B | 34981 | IWB34981 | IAAV5167                    | 68.9 |
| 7921 | 7B | 27142 | IWB27142 | Excalibur_c50408_663        | 68.9 |
| 7922 | 7B | 68676 | IWB68676 | Tdurum_contig17697_671      | 69.2 |
| 7923 | 7B | 6594  | IWB6594  | BS00013985_51               | 69.5 |
| 7924 | 7B | 40712 | IWB40712 | Kukri_c11959_587            | 70.0 |
| 7925 | 7B | 41653 | IWB41653 | Kukri_c16814_103            | 70.0 |
| 7926 | 7B | 6544  | IWB6544  | BS00012264_51               | 70.3 |
| 7927 | 7B | 35653 | IWB35653 | IACX11047                   | 70.3 |
| 7928 | 7B | 60879 | IWB60879 | RAC875_c871_1345            | 70.3 |
| 7929 | 7B | 35704 | IWB35704 | IACX11443                   | 70.3 |
| 7930 | 7B | 21669 | IWB21669 | Excalibur_c1055_565         | 70.3 |
| 7931 | 7B | 28666 | IWB28666 | Excalibur_c7338_563         | 70.3 |
| 7932 | 7B | 78911 | IWA4864  | wsnp_Ex_c9017_15025720      | 70.3 |
| 7933 | 7B | 71622 | IWB71622 | Tdurum_contig45585_432      | 70.3 |

|      |    |       |          |                         |      |
|------|----|-------|----------|-------------------------|------|
| 7934 | 7B | 2656  | IWB2656  | BobWhite_c3385_64       | 70.3 |
| 7935 | 7B | 34699 | IWB34699 | IAAV3313                | 70.8 |
| 7936 | 7B | 7134  | IWB7134  | BS00022522_51           | 70.8 |
| 7937 | 7B | 71465 | IWB71465 | Tdurum_contig43954_1287 | 70.8 |
| 7938 | 7B | 63121 | IWB63121 | RAC875_rep_c78007_394   | 71.1 |
| 7939 | 7B | 57797 | IWB57797 | RAC875_c41938_471       | 71.1 |
| 7940 | 7B | 45187 | IWB45187 | Kukri_c42052_491        | 72.5 |
| 7941 | 7B | 48348 | IWB48348 | Kukri_c93758_111        | 72.5 |
| 7942 | 7B | 40181 | IWB40181 | Ku_c9679_441            | 72.8 |
| 7943 | 7B | 72241 | IWB72241 | Tdurum_contig52079_1174 | 72.8 |
| 7944 | 7B | 64121 | IWB64121 | RFL_Contig2905_931      | 73.1 |
| 7945 | 7B | 73580 | IWB73580 | Tdurum_contig82534_311  | 73.1 |
| 7946 | 7B | 332   | IWB332   | BobWhite_c12264_248     | 73.1 |
| 7947 | 7B | 57616 | IWB57616 | RAC875_c40383_124       | 73.1 |
| 7948 | 7B | 73579 | IWB73579 | Tdurum_contig82534_237  | 73.1 |
| 7949 | 7B | 65953 | IWB65953 | TA005284-0990           | 73.1 |
| 7950 | 7B | 42933 | IWB42933 | Kukri_c24148_254        | 73.1 |
| 7951 | 7B | 1307  | IWB1307  | BobWhite_c19752_293     | 73.1 |
| 7952 | 7B | 7388  | IWB7388  | BS00023034_51           | 73.1 |
| 7953 | 7B | 7861  | IWB7861  | BS00031923_51           | 73.1 |
| 7954 | 7B | 10912 | IWB10912 | BS00077049_51           | 73.3 |
| 7955 | 7B | 5626  | IWB5626  | BobWhite_rep_c66883_80  | 73.6 |
| 7956 | 7B | 27699 | IWB27699 | Excalibur_c57071_177    | 73.6 |
| 7957 | 7B | 65152 | IWB65152 | RFL_Contig5898_1464     | 73.6 |
| 7958 | 7B | 72828 | IWB72828 | Tdurum_contig61856_628  | 73.6 |
| 7959 | 7B | 1799  | IWB1799  | BobWhite_c24096_215     | 73.6 |
| 7960 | 7B | 39684 | IWB39684 | Ku_c5969_1667           | 73.6 |
| 7961 | 7B | 65154 | IWB65154 | RFL_Contig5898_807      | 73.6 |
| 7962 | 7B | 3163  | IWB3163  | BobWhite_c4134_984      | 73.6 |
| 7963 | 7B | 72829 | IWB72829 | Tdurum_contig61856_900  | 73.6 |
| 7964 | 7B | 72830 | IWB72830 | Tdurum_contig61856_957  | 73.6 |
| 7965 | 7B | 5034  | IWB5034  | BobWhite_rep_c53128_119 | 73.9 |
| 7966 | 7B | 38836 | IWB38836 | Ku_c22990_969           | 74.2 |
| 7967 | 7B | 62409 | IWB62409 | RAC875_rep_c117259_207  | 74.2 |
| 7968 | 7B | 22760 | IWB22760 | Excalibur_c16245_840    | 74.4 |
| 7969 | 7B | 22759 | IWB22759 | Excalibur_c16245_801    | 74.7 |
| 7970 | 7B | 49105 | IWB49105 | Kukri_rep_c105704_342   | 75.0 |
| 7971 | 7B | 5370  | IWB5370  | BobWhite_rep_c63346_248 | 75.3 |
| 7972 | 7B | 34000 | IWB34000 | GENE-4528_511           | 76.2 |
| 7973 | 7B | 9367  | IWB9367  | BS00064783_51           | 77.0 |
| 7974 | 7B | 25689 | IWB25689 | Excalibur_c36221_1031   | 77.6 |
| 7975 | 7B | 8868  | IWB8868  | BS00062611_51           | 77.9 |
| 7976 | 7B | 69562 | IWB69562 | Tdurum_contig28598_245  | 79.3 |
| 7977 | 7B | 2238  | IWB2238  | BobWhite_c2892_167      | 79.5 |
| 7978 | 7B | 71995 | IWB71995 | Tdurum_contig49656_679  | 79.5 |
| 7979 | 7B | 2239  | IWB2239  | BobWhite_c2892_211      | 79.5 |
| 7980 | 7B | 77980 | IWA3675  | wsnp_Ex_c3930_7127883   | 80.1 |
| 7981 | 7B | 29360 | IWB29360 | Excalibur_c9179_2416    | 80.1 |
| 7982 | 7B | 78631 | IWA4522  | wsnp_Ex_c64848_63486322 | 80.1 |
| 7983 | 7B | 80610 | IWA7190  | wsnp_Ku_c5745_10169129  | 80.1 |
| 7984 | 7B | 78931 | IWA4888  | wsnp_Ex_c9179_15264221  | 80.1 |
| 7985 | 7B | 7512  | IWB7512  | BS00023884_51           | 85.7 |
| 7986 | 7B | 45006 | IWB45006 | Kukri_c40149_436        | 85.7 |
| 7987 | 7B | 21792 | IWB21792 | Excalibur_c11062_582    | 87.1 |

|      |    |       |          |                             |      |
|------|----|-------|----------|-----------------------------|------|
| 7988 | 7B | 25083 | IWB25083 | Excalibur_c3129_4903        | 87.1 |
| 7989 | 7B | 27880 | IWB27880 | Excalibur_c5938_301         | 87.1 |
| 7990 | 7B | 45529 | IWB45529 | Kukri_c45404_121            | 87.1 |
| 7991 | 7B | 27883 | IWB27883 | Excalibur_c5938_994         | 87.1 |
| 7992 | 7B | 61977 | IWB61977 | RAC875_rep_c110526_229      | 87.1 |
| 7993 | 7B | 77776 | IWA3415  | wsnp_Ex_c32905_41484291     | 87.1 |
| 7994 | 7B | 30725 | IWB30725 | Excalibur_rep_c66257_477    | 87.1 |
| 7995 | 7B | 49181 | IWB49181 | Kukri_rep_c106477_365       | 87.1 |
| 7996 | 7B | 5972  | IWB5972  | BS00004376_51               | 87.1 |
| 7997 | 7B | 6736  | IWB6736  | BS00021717_51               | 87.1 |
| 7998 | 7B | 27877 | IWB27877 | Excalibur_c5938_1703        | 87.1 |
| 7999 | 7B | 34196 | IWB34196 | GENE-4848_95                | 87.1 |
| 8000 | 7B | 34230 | IWB34230 | GENE-4900_136               | 87.1 |
| 8001 | 7B | 44608 | IWB44608 | Kukri_c3676_483             | 87.1 |
| 8002 | 7B | 61541 | IWB61541 | RAC875_rep_c106035_443      | 87.1 |
| 8003 | 7B | 27876 | IWB27876 | Excalibur_c5938_1669        | 87.1 |
| 8004 | 7B | 23318 | IWB23318 | Excalibur_c19455_3496       | 87.1 |
| 8005 | 7B | 27881 | IWB27881 | Excalibur_c5938_371         | 87.1 |
| 8006 | 7B | 73667 | IWB73667 | Tdurum_contig8448_363       | 87.1 |
| 8007 | 7B | 9811  | IWB9811  | BS00066456_51               | 87.1 |
| 8008 | 7B | 24264 | IWB24264 | Excalibur_c25090_830        | 87.1 |
| 8009 | 7B | 25962 | IWB25962 | Excalibur_c3870_288         | 87.1 |
| 8010 | 7B | 62681 | IWB62681 | RAC875_rep_c70367_158       | 87.1 |
| 8011 | 7B | 74283 | IWB74283 | tplb0026f23_1134            | 87.1 |
| 8012 | 7B | 22872 | IWB22872 | Excalibur_c1688_436         | 87.1 |
| 8013 | 7B | 57955 | IWB57955 | RAC875_c43579_80            | 87.1 |
| 8014 | 7B | 47876 | IWB47876 | Kukri_c81094_434            | 87.1 |
| 8015 | 7B | 25963 | IWB25963 | Excalibur_c3870_89          | 87.1 |
| 8016 | 7B | 62682 | IWB62682 | RAC875_rep_c70367_185       | 87.1 |
| 8017 | 7B | 53111 | IWB53111 | RAC875_c10585_181           | 87.1 |
| 8018 | 7B | 51145 | IWB51145 | Ra_c14987_667               | 87.1 |
| 8019 | 7D | 56616 | IWB56616 | RAC875_c31483_117           | 0.0  |
| 8020 | 7D | 15481 | IWB15481 | D_contig08599_465           | 0.3  |
| 8021 | 7D | 19363 | IWB19363 | D_GDS7LZN02F7CND_99         | 0.3  |
| 8022 | 7D | 9595  | IWB9595  | BS00065623_51               | 3.2  |
| 8023 | 7D | 45523 | IWB45523 | Kukri_c45368_300            | 3.7  |
| 8024 | 7D | 47867 | IWB47867 | Kukri_c80931_147            | 4.0  |
| 8025 | 7D | 29254 | IWB29254 | Excalibur_c88899_626        | 4.0  |
| 8026 | 7D | 55455 | IWB55455 | RAC875_c23140_909           | 4.6  |
| 8027 | 7D | 50978 | IWB50978 | Ra_c11887_1826              | 4.6  |
| 8028 | 7D | 22849 | IWB22849 | Excalibur_c16775_1833       | 4.6  |
| 8029 | 7D | 340   | IWB340   | BobWhite_c1234_238          | 7.9  |
| 8030 | 7D | 8938  | IWB8938  | BS00062860_51               | 7.9  |
| 8031 | 7D | 80807 | IWA7455  | wsnp_Ku_rep_c69533_68919669 | 8.2  |
| 8032 | 7D | 48611 | IWB48611 | Kukri_rep_c101179_404       | 8.2  |
| 8033 | 7D | 16682 | IWB16682 | D_contig36176_338           | 8.2  |
| 8034 | 7D | 16214 | IWB16214 | D_contig25144_46            | 8.2  |
| 8035 | 7D | 10326 | IWB10326 | BS00068485_51               | 8.2  |
| 8036 | 7D | 12476 | IWB12476 | BS00110124_51               | 9.0  |
| 8037 | 7D | 20272 | IWB20272 | Ex_c25027_535               | 9.0  |
| 8038 | 7D | 20013 | IWB20013 | Ex_c18266_680               | 9.0  |
| 8039 | 7D | 7092  | IWB7092  | BS00022449_51               | 9.0  |
| 8040 | 7D | 9967  | IWB9967  | BS00067140_51               | 9.0  |
| 8041 | 7D | 17499 | IWB17499 | D_F5XZDLF01ASSE2_190        | 9.0  |

|      |    |       |          |                         |      |
|------|----|-------|----------|-------------------------|------|
| 8042 | 7D | 15620 | IWB15620 | D_contig11494_202       | 9.0  |
| 8043 | 7D | 12582 | IWB12582 | BS00110642_51           | 9.0  |
| 8044 | 7D | 33244 | IWB33244 | GENE-3129_828           | 9.3  |
| 8045 | 7D | 4483  | IWB4483  | BobWhite_c8454_782      | 9.3  |
| 8046 | 7D | 17005 | IWB17005 | D_contig65480_176       | 17.0 |
| 8047 | 7D | 4505  | IWB4505  | BobWhite_c8680_453      | 17.5 |
| 8048 | 7D | 73843 | IWB73843 | Tdurum_contig93100_640  | 17.5 |
| 8049 | 7D | 57490 | IWB57490 | RAC875_c39217_314       | 17.5 |
| 8050 | 7D | 15569 | IWB15569 | D_contig10382_335       | 19.5 |
| 8051 | 7D | 55830 | IWB55830 | RAC875_c25695_316       | 19.8 |
| 8052 | 7D | 17232 | IWB17232 | D_contig80193_238       | 25.0 |
| 8053 | 7D | 17538 | IWB17538 | D_F5XZDLF01CQM1B_324    | 38.5 |
| 8054 | 7D | 18267 | IWB18267 | D_GBB4FNX02GS9OS_101    | 39.6 |
| 8055 | 7D | 15280 | IWB15280 | D_contig03850_135       | 41.6 |
| 8056 | 7D | 44199 | IWB44199 | Kukri_c33415_436        | 41.6 |
| 8057 | 7D | 16984 | IWB16984 | D_contig63536_65        | 42.4 |
| 8058 | 7D | 74167 | IWB74167 | tplb0024a09_919         | 43.0 |
| 8059 | 7D | 74164 | IWB74164 | tplb0024a09_2369        | 43.0 |
| 8060 | 7D | 74165 | IWB74165 | tplb0024a09_742         | 43.0 |
| 8061 | 7D | 17457 | IWB17457 | D_F5MV3MU01EDQJ4_219    | 43.0 |
| 8062 | 7D | 27288 | IWB27288 | Excalibur_c52102_630    | 44.1 |
| 8063 | 7D | 41108 | IWB41108 | Kukri_c13845_424        | 47.9 |
| 8064 | 7D | 75410 | IWA118   | wsnp_BE443044D_Ta_1_1   | 47.9 |
| 8065 | 7D | 48862 | IWB48862 | Kukri_rep_c103248_582   | 47.9 |
| 8066 | 7D | 48288 | IWB48288 | Kukri_c92151_216        | 49.6 |
| 8067 | 7D | 19377 | IWB19377 | D_GDS7LZN02FSYZC_227    | 49.6 |
| 8068 | 7D | 44140 | IWB44140 | Kukri_c32845_116        | 49.6 |
| 8069 | 7D | 72087 | IWB72087 | Tdurum_contig50560_1407 | 49.8 |
| 8070 | 7D | 16798 | IWB16798 | D_contig45163_68        | 51.5 |
| 8071 | 7D | 32144 | IWB32144 | GENE-0921_485           | 51.5 |
| 8072 | 7D | 42848 | IWB42848 | Kukri_c23682_76         | 51.5 |
| 8073 | 7D | 77128 | IWA2545  | wsnp_Ex_c2054_3852564   | 51.5 |
| 8074 | 7D | 18577 | IWB18577 | D_GBUVHFX01BEHL1_132    | 52.9 |
| 8075 | 7D | 16986 | IWB16986 | D_contig63719_554       | 53.5 |
| 8076 | 7D | 16460 | IWB16460 | D_contig30716_172       | 54.1 |
| 8077 | 7D | 17042 | IWB17042 | D_contig67456_197       | 55.3 |
| 8078 | 7D | 3530  | IWB3530  | BobWhite_c46765_212     | 55.5 |
| 8079 | 7D | 16173 | IWB16173 | D_contig24308_396       | 55.5 |
| 8080 | 7D | 16033 | IWB16033 | D_contig21057_183       | 55.5 |
| 8081 | 7D | 35888 | IWB35888 | IACX296                 | 55.5 |
| 8082 | 7D | 18724 | IWB18724 | D_GBUVHFX02I35PL_180    | 55.5 |
| 8083 | 7D | 16581 | IWB16581 | D_contig33636_348       | 55.5 |
| 8084 | 7D | 50526 | IWB50526 | Kukri_rep_c94644_137    | 55.5 |
| 8085 | 7D | 17817 | IWB17817 | D_GA8KES401EZBT8_411    | 55.5 |
| 8086 | 7D | 17090 | IWB17090 | D_contig70596_342       | 55.5 |
| 8087 | 7D | 17551 | IWB17551 | D_F5XZDLF01D9HYT_373    | 56.4 |
| 8088 | 7D | 5524  | IWB5524  | BobWhite_rep_c65034_450 | 57.2 |
| 8089 | 7D | 62197 | IWB62197 | RAC875_rep_c113244_113  | 57.7 |
| 8090 | 7D | 53819 | IWB53819 | RAC875_c13942_2973      | 58.6 |
| 8091 | 7D | 49354 | IWB49354 | Kukri_rep_c108604_858   | 59.4 |
| 8092 | 7D | 81073 | IWA7828  | wsnp_Ra_c2930_5550871   | 59.7 |
| 8093 | 7D | 63737 | IWB63737 | RFL_Contig1820_712      | 59.7 |
| 8094 | 7D | 19259 | IWB19259 | D_GDRF1KQ02JPR1A_106    | 59.7 |
| 8095 | 7D | 63738 | IWB63738 | RFL_Contig1820_846      | 59.7 |

|      |    |       |          |                             |      |
|------|----|-------|----------|-----------------------------|------|
| 8096 | 7D | 78207 | IWA3970  | wsnp_Ex_c4637_8299644       | 59.7 |
| 8097 | 7D | 81072 | IWA7827  | wsnp_Ra_c2930_5550811       | 59.7 |
| 8098 | 7D | 17768 | IWB17768 | D_GA8KES401D3GU4_112        | 60.5 |
| 8099 | 7D | 13142 | IWB13142 | CAP11_rep_c8279_82          | 60.8 |
| 8100 | 7D | 77110 | IWA2523  | wsnp_Ex_c20320_29383733     | 60.8 |
| 8101 | 7D | 54708 | IWB54708 | RAC875_c1863_3196           | 60.8 |
| 8102 | 7D | 77109 | IWA2522  | wsnp_Ex_c20320_29383710     | 60.8 |
| 8103 | 7D | 77108 | IWA2521  | wsnp_Ex_c20320_29383285     | 60.8 |
| 8104 | 7D | 60176 | IWB60176 | RAC875_c68368_99            | 61.1 |
| 8105 | 7D | 21022 | IWB21022 | Ex_c6280_1149               | 61.1 |
| 8106 | 7D | 4724  | IWB4724  | BobWhite_rep_c49048_493     | 61.1 |
| 8107 | 7D | 21023 | IWB21023 | Ex_c6280_1262               | 61.1 |
| 8108 | 7D | 81505 | IWA8486  | wsnp_RFL_Contig3557_3736656 | 63.4 |
| 8109 | 7D | 14320 | IWB14320 | CAP7_c9278_185              | 70.4 |
| 8110 | 7D | 15471 | IWB15471 | D_contig08289_112           | 73.6 |
| 8111 | 7D | 16392 | IWB16392 | D_contig29036_393           | 74.4 |
| 8112 | 7D | 15378 | IWB15378 | D_contig06235_330           | 74.4 |
| 8113 | 7D | 17647 | IWB17647 | D_F5XZDLF02HKTZA_121        | 74.4 |
| 8114 | 7D | 17767 | IWB17767 | D_GA8KES401D0K1W_269        | 75.8 |
| 8115 | 7D | 17599 | IWB17599 | D_F5XZDLF02FF9I1_181        | 76.1 |
| 8116 | 7D | 15262 | IWB15262 | D_contig03395_496           | 76.1 |
| 8117 | 7D | 17823 | IWB17823 | D_GA8KES402F8B6V_169        | 77.3 |
| 8118 | 7D | 18840 | IWB18840 | D_GCE8AKX01EF85I_287        | 77.3 |
| 8119 | 7D | 17664 | IWB17664 | D_F5XZDLF02I2FUQ_192        | 77.3 |
| 8120 | 7D | 75851 | IWA732   | wsnp_CAP11_c2839_1425826    | 77.3 |
| 8121 | 7D | 17565 | IWB17565 | D_F5XZDLF01DR0H1_266        | 77.3 |
| 8122 | 7D | 15080 | IWB15080 | CAP8_rep_c9420_186          | 77.3 |
| 8123 | 7D | 75488 | IWA223   | wsnp_be490219D_Ta_1_1       | 77.3 |
| 8124 | 7D | 19438 | IWB19438 | D_GDS7LZN02HQ1RY_252        | 77.3 |
| 8125 | 7D | 22212 | IWB22212 | Excalibur_c13094_523        | 77.6 |
| 8126 | 7D | 29923 | IWB29923 | Excalibur_rep_c103227_148   | 77.8 |
| 8127 | 7D | 75584 | IWA359   | wsnp_BE586072D_Ta_1_2       | 77.8 |
| 8128 | 7D | 81418 | IWA8330  | wsnp_RFL_Contig2400_1920978 | 77.8 |
| 8129 | 7D | 18566 | IWB18566 | D_GBUVHFX01B47JJ_155        | 77.8 |
| 8130 | 7D | 16481 | IWB16481 | D_contig31424_214           | 78.4 |
| 8131 | 7D | 18682 | IWB18682 | D_GBUVHFX02FPMHK_267        | 78.4 |
| 8132 | 7D | 39156 | IWB39156 | Ku_c31629_1269              | 78.4 |
| 8133 | 7D | 77288 | IWA2772  | wsnp_Ex_c23001_32223579     | 78.4 |
| 8134 | 7D | 36226 | IWB36226 | IACX7714                    | 78.4 |
| 8135 | 7D | 6064  | IWB6064  | BS00009457_51               | 78.4 |
| 8136 | 7D | 76877 | IWA2208  | wsnp_Ex_c17346_26030825     | 78.4 |
| 8137 | 7D | 39006 | IWB39006 | Ku_c26916_669               | 78.4 |
| 8138 | 7D | 17665 | IWB17665 | D_F5XZDLF02I35V1_104        | 78.4 |
| 8139 | 7D | 46722 | IWB46722 | Kukri_c58234_519            | 78.9 |
| 8140 | 7D | 22705 | IWB22705 | Excalibur_c1586_87          | 82.2 |
| 8141 | 7D | 21364 | IWB21364 | Ex_c8238_637                | 83.0 |
| 8142 | 7D | 18683 | IWB18683 | D_GBUVHFX02FPTA2_248        | 83.0 |
| 8143 | 7D | 18708 | IWB18708 | D_GBUVHFX02H0C6I_259        | 83.0 |
| 8144 | 7D | 16441 | IWB16441 | D_contig30228_111           | 83.0 |
| 8145 | 7D | 18618 | IWB18618 | D_GBUVHFX01CPG5E_341        | 83.3 |
| 8146 | 7D | 64547 | IWB64547 | RFL_Contig3964_661          | 83.3 |
| 8147 | 7D | 19183 | IWB19183 | D_GDRF1KQ01DXO82_144        | 84.2 |
| 8148 | 7D | 41575 | IWB41575 | Kukri_c16416_647            | 85.1 |
| 8149 | 7D | 15546 | IWB15546 | D_contig09987_661           | 85.9 |

|      |    |       |          |                         |       |
|------|----|-------|----------|-------------------------|-------|
| 8150 | 7D | 76924 | IWA2273  | wsnp_Ex_c17914_26681837 | 86.2  |
| 8151 | 7D | 16157 | IWB16157 | D_contig23954_311       | 86.5  |
| 8152 | 7D | 8024  | IWB8024  | BS00035732_51           | 87.0  |
| 8153 | 7D | 45846 | IWB45846 | Kukri_c48125_714        | 87.0  |
| 8154 | 7D | 53451 | IWB53451 | RAC875_c11933_885       | 87.0  |
| 8155 | 7D | 16883 | IWB16883 | D_contig55386_313       | 87.9  |
| 8156 | 7D | 9724  | IWB9724  | BS00066128_51           | 87.9  |
| 8157 | 7D | 8604  | IWB8604  | BS00051607_51           | 87.9  |
| 8158 | 7D | 11300 | IWB11300 | BS00083421_51           | 87.9  |
| 8159 | 7D | 76634 | IWA1902  | wsnp_Ex_c145_285194     | 88.4  |
| 8160 | 7D | 34881 | IWB34881 | IAAV4510                | 92.6  |
| 8161 | 7D | 41457 | IWB41457 | Kukri_c15768_1383       | 93.2  |
| 8162 | 7D | 7177  | IWB7177  | BS00022610_51           | 93.2  |
| 8163 | 7D | 61610 | IWB61610 | RAC875_rep_c106588_205  | 93.7  |
| 8164 | 7D | 17008 | IWB17008 | D_contig65536_79        | 93.7  |
| 8165 | 7D | 8877  | IWB8877  | BS00062644_51           | 94.0  |
| 8166 | 7D | 7276  | IWB7276  | BS00022825_51           | 94.3  |
| 8167 | 7D | 35552 | IWB35552 | IAAV8855                | 94.3  |
| 8168 | 7D | 43427 | IWB43427 | Kukri_c27397_754        | 96.5  |
| 8169 | 7D | 63887 | IWB63887 | RFL_Contig2257_810      | 97.6  |
| 8170 | 7D | 17747 | IWB17747 | D_GA8KES401CIKOJ_160    | 99.1  |
| 8171 | 7D | 74708 | IWB74708 | tplb0041e14_1096        | 100.9 |
| 8172 | 7D | 18303 | IWB18303 | D_GBB4FNX02ILZW2_114    | 100.9 |
| 8173 | 7D | 28893 | IWB28893 | Excalibur_c7895_385     | 100.9 |
| 8174 | 7D | 40258 | IWB40258 | Kukri_c101311_72        | 100.9 |
| 8175 | 7D | 75160 | IWB75160 | tplb0057p21_1042        | 100.9 |
| 8176 | 7D | 237   | IWB237   | BobWhite_c11549_468     | 100.9 |
| 8177 | 7D | 42667 | IWB42667 | Kukri_c22576_148        | 100.9 |
| 8178 | 7D | 16474 | IWB16474 | D_contig31161_94        | 100.9 |
| 8179 | 7D | 16233 | IWB16233 | D_contig25474_188       | 100.9 |
| 8180 | 7D | 16726 | IWB16726 | D_contig37514_120       | 100.9 |
| 8181 | 7D | 18531 | IWB18531 | D_GBQ4KXB01EJHOJ_221    | 106.0 |
| 8182 | 7D | 19360 | IWB19360 | D_GDS7LZN02F6AEK_164    | 108.3 |
| 8183 | 7D | 18876 | IWB18876 | D_GCE8AKX02H05OL_77     | 109.1 |
| 8184 | 7D | 25012 | IWB25012 | Excalibur_c30730_276    | 122.3 |
| 8185 | 7D | 8361  | IWB8361  | BS00044260_51           | 122.3 |
| 8186 | 7D | 27389 | IWB27389 | Excalibur_c5346_2716    | 122.3 |
| 8187 | 7D | 3827  | IWB3827  | BobWhite_c5419_165      | 122.3 |
| 8188 | 7D | 45562 | IWB45562 | Kukri_c45749_158        | 122.5 |
| 8189 | 7D | 17509 | IWB17509 | D_F5XZDLF01B8DH4_88     | 124.5 |
| 8190 | 7D | 33882 | IWB33882 | GENE-4272_165           | 127.1 |
| 8191 | 7D | 28036 | IWB28036 | Excalibur_c61318_467    | 128.6 |
| 8192 | 7D | 18483 | IWB18483 | D_GBQ4KXB01B0XFC_371    | 128.6 |
| 8193 | 7D | 48455 | IWB48455 | Kukri_c9683_804         | 129.1 |
| 8194 | 7D | 50603 | IWB50603 | Kukri_s106214_192       | 130.2 |
| 8195 | 7D | 20242 | IWB20242 | Ex_c24486_509           | 136.2 |
| 8196 | 7D | 15613 | IWB15613 | D_contig11313_286       | 137.6 |
| 8197 | 7D | 49080 | IWB49080 | Kukri_rep_c105287_311   | 145.3 |
| 8198 | 7D | 6751  | IWB6751  | BS00021745_51           | 145.3 |
| 8199 | 7D | 11947 | IWB11947 | BS00096024_51           | 145.9 |
| 8200 | 7D | 11948 | IWB11948 | BS00096025_51           | 145.9 |
| 8201 | 7D | 18349 | IWB18349 | D_GBF1XID01AXA2S_404    | 146.4 |
| 8202 | 7D | 57883 | IWB57883 | RAC875_c42884_89        | 146.4 |
| 8203 | 7D | 18541 | IWB18541 | D_GBQ4KXB02FR7XF_153    | 146.9 |
